# Supplementary material for: TDP-43 proteinopathy alters the ribosome association of multiple mRNAs including the glypican Dally-like protein (Dlp)/GPC6
Source: Acta Neuropathol Commun. 2021 Mar 24;9:52. doi: 10.1186/s40478-021-01148-z (PMC7992842; doi:10.1186/s40478-021-01148-z)
Supplement: Supplementary file 2 — Additional file 2. RNAs associated with ribosomes in controls, RNAs with altered ribosome association in TDP-43 proteinopathy and TRAP GO term analyses. [file 40478_2021_1148_MOESM2_ESM.xlsx]

## Sheet: Fig2_SupTable1
RpL10	baseMean	log2FoldChange	lfcSE	stat	pvalue	padj	symbol	X	RpL10; TDP-43-WT	baseMean	log2FoldChange	lfcSE	stat	pvalue	padj	symbol	X	RpL10; TDP-43-G298S	baseMean	log2FoldChange	lfcSE	stat	pvalue	padj	symbol	Figure 2 - Supplemental Table 1. Differential expression analysis for RpL10 co-precipitated RNAs versus the Ventral Nerve Cord transciptome. (TRAP)
FBgn0003357	26139.8	10.1231	0.268788	37.6622	0	0	Jon99Ciii	X	FBgn0034290	10593.3	10.2968	0.420417	24.492	1.8e-132	1.69e-128	CG5773	X	FBgn0031908	8704.94	7.59801	0.200506	37.8941	0	0	CG5177
FBgn0036024	25700	10.6688	0.292399	36.4872	1.77003e-291	8.651e-288	CG18180	X	FBgn0029507	12372.9	10.0743	0.43395	23.2153	3.19e-119	1.5e-115	Tsp42Ed	X	FBgn0035665	94206.8	10.9384	0.278595	39.2626	0	0	Jon65Aiii
FBgn0003356	18789	10.1777	0.283569	35.8915	4.14565e-282	1.35079e-278	Jon99Cii	X	FBgn0053306	3987.39	10.2737	0.467607	21.9708	5.48e-107	1.72e-103	CG33306	X	FBgn0036717	11166.9	9.88019	0.257798	38.3254	0	0	CG13731
FBgn0000044	54943.3	7.99966	0.232183	34.4541	3.90558e-260	9.54426e-257	Act57B	X	FBgn0051778	12274.9	9.33787	0.429594	21.7365	9.27e-105	2.18e-101	CG31778	X	FBgn0037114	50653.6	9.19846	0.227536	40.4265	0	0	Cpr78E
FBgn0085308	23681.3	11.4402	0.334096	34.2422	5.69418e-257	1.11321e-253	CG34279	X	FBgn0003149	7950.18	8.88085	0.412983	21.5042	1.42e-102	2.68e-99	Prm	X	FBgn0051439	15310.1	10.5336	0.252103	41.7829	0	0	Muc96D
FBgn0003373	928502	14.5493	0.433247	33.5819	3.0816e-247	5.02044e-244	Sgs3	X	FBgn0039474	12804	13.4493	0.631705	21.2904	1.39e-100	2.19e-97	CG6283	X	FBgn0259998	21657.6	11.4296	0.256664	44.5313	0	0	CG17571
FBgn0266446	12038	9.80566	0.294487	33.2975	4.20097e-243	5.86636e-240	CG45076	X	FBgn0030443	7921.66	11.4709	0.541429	21.1863	1.28e-99	1.72e-96	CG12715	X	FBgn0040060	102038	11.0414	0.297797	37.077	6.59578e-301	9.16908e-298	yip7
FBgn0035886	25620.7	10.321	0.321451	32.1075	3.46835e-226	4.23789e-223	Jon66Ci	X	FBgn0052656	8171	12.2053	0.587764	20.7657	8.85e-96	1.04e-92	Muc11A	X	FBgn0032075	9101.45	10.2265	0.278282	36.7486	1.22253e-295	1.48706e-292	Tsp29Fb
FBgn0030836	32881.4	10.7398	0.335114	32.0482	2.3262e-225	2.52652e-222	CG8664	X	FBgn0040732	7746.02	9.83032	0.47492	20.6989	3.54e-95	3.71e-92	CG16926	X	FBgn0036949	28559	12.0055	0.327921	36.6109	1.91679e-293	2.07247e-290	CG7290
FBgn0040565	29079.8	11.5117	0.360295	31.9509	5.25682e-224	5.13855e-221	CG7606	X	FBgn0029990	73310	10.4515	0.505307	20.6834	4.89e-95	4.6e-92	CG2233	X	FBgn0036493	7655	9.12565	0.249842	36.5256	4.3451e-292	4.22822e-289	CG7255
FBgn0051439	13549.2	10.2213	0.321079	31.8342	2.17979e-222	1.93704e-219	Muc96D	X	FBgn0034291	15047.4	12.4475	0.602041	20.6755	5.76e-95	4.93e-92	CG5770	X	FBgn0003149	12924.4	9.55571	0.261879	36.489	1.65638e-291	1.4653e-288	Prm
FBgn0004592	45189.1	11.734	0.374683	31.3172	2.72359e-215	2.21859e-212	Eig71Ee	X	FBgn0038784	8244.03	10.9607	0.530898	20.6457	1.07e-94	8.38e-92	CG4362	X	FBgn0035154	23766.6	12.145	0.333328	36.4355	1.16556e-290	9.45169e-288	CG3344
FBgn0032144	9590.57	9.53057	0.304434	31.3058	3.88543e-215	2.92155e-212	CG17633	X	FBgn0038774	7652.78	10.2747	0.499547	20.5681	5.3e-94	3.84e-91	CG5023	X	FBgn0034292	7797.46	10.7365	0.301869	35.5668	4.56467e-277	3.41683e-274	CG5767
FBgn0040959	18028.3	11.2697	0.361014	31.2169	6.28492e-214	4.38822e-211	Peritrophin-15a	X	FBgn0031908	17429.2	8.78997	0.428288	20.5235	1.33e-93	8.93e-91	CG5177	X	FBgn0038643	6005.88	10.0232	0.28673	34.957	1.01524e-267	7.05667e-265	CG14300
FBgn0003149	8308.09	9.13475	0.295217	30.9425	3.20905e-210	2.09123e-207	Prm	X	FBgn0034856	4287.3	8.77466	0.428937	20.4568	5.23e-93	3.28e-90	yellow-d2	X	FBgn0033826	6128.15	9.99971	0.288411	34.6717	2.1041e-263	1.365e-260	CG4734
FBgn0031653	13459.8	10.2955	0.333024	30.9152	7.45276e-210	4.55317e-207	Jon25Biii	X	FBgn0004117	22695	8.88219	0.438848	20.2398	4.37e-91	2.57e-88	Tm2	X	FBgn0035666	8901.45	10.4923	0.302816	34.649	4.61874e-263	2.80906e-260	Jon65Aii
FBgn0014863	11254.9	9.25949	0.304646	30.3943	6.53272e-203	3.75631e-200	Mlp84B	X	FBgn0038294	26690.6	7.96533	0.397092	20.0591	1.68e-89	9.3e-87	Mf	X	FBgn0014863	13253	9.14149	0.265363	34.4491	4.65203e-260	2.66288e-257	Mlp84B
FBgn0035917	47472.7	9.36406	0.309685	30.2374	7.64115e-201	4.14957e-198	Zasp66	X	FBgn0062412	4493.98	10.8247	0.540286	20.0351	2.73e-89	1.43e-86	Ctr1B	X	FBgn0052249	50740.4	10.7417	0.31459	34.1451	1.58349e-255	8.56054e-253	CG32249
FBgn0003374	23411.4	10.7611	0.362355	29.6977	8.22178e-194	4.22989e-191	Sgs4	X	FBgn0051901	4914.55	11.8004	0.589945	20.0025	5.24e-89	2.59e-86	Mur29B	X	FBgn0034856	4134.34	9.269	0.27388	33.8434	4.54607e-251	2.32831e-248	yellow-d2
FBgn0028544	5994.36	8.74387	0.298636	29.2793	1.90171e-188	9.29459e-186	CG16884	X	FBgn0028533	7629.39	11.5266	0.577055	19.975	9.1e-89	4.28e-86	CG7953	X	FBgn0085308	10055.5	10.1423	0.30151	33.6384	4.60488e-248	2.24051e-245	CG34279
FBgn0031908	8786.29	8.19292	0.279851	29.276	2.09501e-188	9.75176e-186	CG5177	X	FBgn0038973	9104.56	10.212	0.511336	19.9713	9.8e-89	4.39e-86	Pebp1	X	FBgn0004430	13522.6	10.3929	0.312122	33.2975	4.19105e-243	1.94205e-240	LysS
FBgn0259998	8915.09	10.6854	0.366779	29.1332	1.36261e-186	6.05434e-184	CG17571	X	FBgn0085308	29081.4	12.3104	0.616528	19.9673	1.06e-88	4.54e-86	CG34279	X	FBgn0035886	44963.6	10.8446	0.327777	33.0851	4.86045e-240	2.14987e-237	Jon66Ci
FBgn0283471	18254.9	8.40105	0.289933	28.9758	1.32747e-184	5.64176e-182	wupA	X	FBgn0002564	268330	9.52678	0.478566	19.9069	3.54e-88	1.45e-85	Lsp1gamma	X	FBgn0053128	11631	10.6774	0.323126	33.044	1.8952e-239	8.01835e-237	CG33128
FBgn0250815	159166	11.5066	0.407886	28.2103	4.37507e-175	1.78193e-172	Jon65Aiv	X	FBgn0283461	9428.67	9.61147	0.485721	19.7881	3.77e-87	1.48e-84	Drs	X	FBgn0038645	4289.83	9.61964	0.297566	32.3278	2.84744e-229	1.15452e-226	CG7714
FBgn0085311	8702.52	10.9894	0.389991	28.1786	1.06912e-174	4.18026e-172	CG34282	X	FBgn0039031	9688.91	10.756	0.551277	19.5111	8.84e-85	3.33e-82	Gbp3	X	FBgn0036422	13502.8	10.7612	0.333078	32.3083	5.35418e-229	2.08406e-226	CG3868
FBgn0039777	10314.1	10.6917	0.381988	27.9896	2.17288e-172	8.16919e-170	Jon99Fii	X	FBgn0038645	5429.41	10.202	0.524331	19.4571	2.54e-84	9.19e-82	CG7714	X	FBgn0085359	5212.82	10.5899	0.330979	31.9957	1.25331e-224	4.69075e-222	CG34330
FBgn0035887	10241.4	10.99	0.393494	27.9292	1.18112e-171	4.27611e-169	Jon66Cii	X	FBgn0034292	9405.23	12.9945	0.669125	19.4202	5.21e-84	1.82e-81	CG5767	X	FBgn0033221	2808.9	8.42986	0.266794	31.5969	4.07407e-219	1.46832e-216	CG12825
FBgn0036952	9439.67	10.6892	0.38475	27.7822	7.11073e-170	2.48241e-167	CG6933	X	FBgn0038643	11989	11.6889	0.60482	19.3262	3.23e-83	1.09e-80	CG14300	X	FBgn0030837	7018.69	10.471	0.331491	31.5875	5.47821e-219	1.90387e-216	CG8661
FBgn0036467	8960.33	11.1945	0.403426	27.7486	1.81229e-169	6.10868e-167	CG12310	X	FBgn0046302	3057.58	7.13761	0.372218	19.1759	5.89e-82	1.91e-79	CG10650	X	FBgn0265991	9686.19	8.11407	0.256933	31.5805	6.84341e-219	2.29632e-216	Zasp52
FBgn0039670	18948.2	13.1593	0.4745	27.7329	2.80378e-169	9.13565e-167	CG7567	X	FBgn0033541	3716.47	11.0922	0.579408	19.144	1.09e-81	3.3e-79	CG12934	X	FBgn0030443	11994.6	11.6701	0.371815	31.3869	3.04985e-216	9.89271e-214	CG12715
FBgn0033679	6320.74	7.98223	0.291001	27.4303	1.19441e-165	3.76623e-163	CG8888	X	FBgn0035670	6593.73	8.77223	0.45821	19.1445	1.07e-81	3.3e-79	CG10472	X	FBgn0085311	7803.77	10.1994	0.32573	31.3126	3.14402e-215	9.86917e-213	CG34282
FBgn0040827	8343.34	9.00274	0.335771	26.8121	2.3332e-158	7.12718e-156	CG13315	X	FBgn0264695	16509.1	10.2481	0.537896	19.0523	6.29e-81	1.85e-78	Mhc	X	FBgn0085256	7478.91	9.28461	0.296526	31.3113	3.27912e-215	9.97161e-213	CG34227
FBgn0035666	7605.86	10.5628	0.394815	26.7537	1.11772e-157	3.31083e-155	Jon65Aii	X	FBgn0030756	4569.52	10.7991	0.568062	19.0104	1.4e-80	3.99e-78	CG9903	X	FBgn0036362	4585.07	10.5294	0.336666	31.2755	1.00376e-214	2.95988e-212	CG10725
FBgn0003378	47066.3	10.95	0.409528	26.7381	1.69945e-157	4.88592e-155	Sgs8	X	FBgn0033137	8698.23	8.57543	0.451392	18.9977	1.78e-80	4.93e-78	Tsp42Ep	X	FBgn0035551	12753.3	11.8064	0.377803	31.2501	2.22901e-214	6.37955e-212	CG7465
FBgn0002773	37786.2	7.86275	0.294362	26.7112	3.49086e-157	9.74948e-155	Mlc2	X	FBgn0034712	20814	14.3495	0.75615	18.977	2.64e-80	7.11e-78	CG3264	X	FBgn0050029	4566.62	9.18319	0.294475	31.1849	1.70594e-213	4.743e-211	CR30029
FBgn0039778	17622.4	10.271	0.386682	26.562	1.86879e-155	5.07427e-153	Jon99Fi	X	FBgn0037065	5408.79	8.24884	0.434773	18.9727	2.87e-80	7.5e-78	CG12974	X	FBgn0002533	51487.5	10.0631	0.322969	31.1581	3.9414e-213	1.06538e-210	Lcp2
FBgn0034288	7067.41	11.0774	0.4191	26.4315	5.95618e-154	1.57356e-151	CG5084	X	FBgn0266446	15760.1	9.39464	0.495954	18.9426	5.09e-80	1.29e-77	CG45076	X	FBgn0030836	40913.6	10.6596	0.342207	31.1497	5.11689e-213	1.34574e-210	CG8664
FBgn0003375	59775.6	11.3548	0.429952	26.4095	1.0666e-153	2.7437e-151	Sgs5	X	FBgn0000044	73178.9	8.05157	0.42905	18.766	1.43e-78	3.55e-76	Act57B	X	FBgn0010425	6271.33	10.3573	0.337219	30.714	3.70587e-207	9.48996e-205	epsilonTry
FBgn0030443	9698.53	12.2144	0.464862	26.2752	3.67981e-152	9.22312e-150	CG12715	X	FBgn0053128	14829	12.4334	0.667819	18.6179	2.3e-77	5.55e-75	CG33128	X	FBgn0250815	268799	11.5003	0.376452	30.5492	5.78809e-205	1.4442e-202	Jon65Aiv
FBgn0085222	4407.09	8.2277	0.31399	26.2037	2.40928e-151	5.88769e-149	CG34193	X	FBgn0014863	14544.8	9.78992	0.5265	18.5943	3.57e-77	8.4e-75	Mlp84B	X	FBgn0035090	4218.89	8.98187	0.294087	30.5416	7.31555e-205	1.77969e-202	CG2736
FBgn0035154	9701.58	12.0865	0.469474	25.7447	3.6947e-146	8.8087e-144	CG3344	X	FBgn0000079	12209.7	11.8859	0.639408	18.589	3.95e-77	9.06e-75	Amy-p	X	FBgn0037065	3877.47	7.30658	0.239494	30.5084	2.01936e-204	4.79278e-202	CG12974
FBgn0040060	63435.6	11.1258	0.433973	25.6372	5.88034e-145	1.36858e-142	yip7	X	FBgn0036493	7919.89	8.38669	0.452013	18.5541	7.56e-77	1.69e-74	CG7255	X	FBgn0035612	6468.31	7.26413	0.238602	30.4445	1.41608e-203	3.28093e-201	frm
FBgn0036362	5703.46	10.6028	0.414128	25.6027	1.42203e-144	3.23264e-142	CG10725	X	FBgn0266448	3205.79	11.0842	0.60063	18.4543	4.82e-76	1.05e-73	CG45078	X	FBgn0030999	16330.3	12.4663	0.413176	30.1719	5.53429e-200	1.25242e-197	Mur18B
FBgn0036951	5027.8	10.5909	0.414392	25.5577	4.50615e-144	1.00108e-141	CG7017	X	FBgn0035917	94367.2	10.1738	0.552044	18.4294	7.64e-76	1.63e-73	Zasp66	X	FBgn0004169	11676.7	8.96835	0.297831	30.1122	3.34969e-199	7.40814e-197	up
FBgn0039114	7383.16	6.8453	0.268952	25.4517	6.75506e-143	1.46735e-140	Lsd-1	X	FBgn0051102	1607.91	8.39388	0.459553	18.2653	1.56e-74	3.27e-72	CG31102	X	FBgn0040959	13307.2	10.8427	0.360184	30.1031	4.41431e-199	9.5457e-197	Peritrophin-15a
FBgn0031747	3803.02	9.91678	0.390456	25.3979	2.65796e-142	5.64816e-140	CG9021	X	FBgn0034031	2404.25	8.79199	0.482646	18.2162	3.84e-74	7.85e-72	CG12963	X	FBgn0263081	11587	11.5191	0.384685	29.9443	5.22089e-197	1.10444e-194	CG43349
FBgn0003377	129415	11.0402	0.434862	25.3878	3.4422e-142	7.15904e-140	Sgs7	X	FBgn0030098	10093.7	11.829	0.650413	18.1869	6.55e-74	1.31e-71	CG12057	X	FBgn0035917	56840.6	9.24173	0.309855	29.826	1.79896e-195	3.72461e-193	Zasp66
FBgn0004117	14755.4	8.18111	0.325084	25.1661	9.41447e-140	1.91722e-137	Tm2	X	FBgn0010424	23154.4	7.25451	0.399497	18.1591	1.09e-73	2.09e-71	TpnC73F	X	FBgn0264695	31062.9	10.4738	0.351425	29.8037	3.50207e-195	7.09972e-193	Mhc
FBgn0036996	4408.21	9.92064	0.395734	25.069	1.08431e-138	2.16309e-136	mag	X	FBgn0031907	14728.4	6.95745	0.383138	18.1591	1.09e-73	2.09e-71	CG5171	X	FBgn0002773	67568.3	8.55361	0.287135	29.7895	5.34473e-195	1.06142e-192	Mlc2
FBgn0043575	7405.69	10.2609	0.409966	25.0287	2.97642e-138	5.81889e-136	PGRP-SC2	X	FBgn0039685	318383	9.50355	0.523798	18.1436	1.44e-73	2.72e-71	Obp99b	X	FBgn0035887	13011.6	11.2057	0.376445	29.7672	1.03743e-194	2.01905e-192	Jon66Cii
FBgn0002772	15142.5	7.80838	0.313353	24.9188	4.65823e-137	8.92827e-135	Mlc1	X	FBgn0260954	3808.43	9.03825	0.499127	18.1081	2.75e-73	5.08e-71	CG42586	X	FBgn0039114	7766.83	6.54855	0.221361	29.5832	2.45924e-192	4.69233e-190	Lsd-1
FBgn0263081	7369.35	11.6448	0.468792	24.84	3.31721e-136	6.23572e-134	CG43349	X	FBgn0031913	13717.4	9.5417	0.527008	18.1054	2.89e-73	5.23e-71	CG5958	X	FBgn0036985	5798.33	9.38512	0.318816	29.4374	1.82283e-190	3.41115e-188	zye
FBgn0034140	6577.99	7.53097	0.308065	24.4461	5.54197e-132	1.02213e-129	Lst	X	FBgn0000078	8489.25	12.1062	0.669659	18.0782	4.73e-73	8.41e-71	Amy-d	X	FBgn0062412	5964.4	10.2443	0.350002	29.2692	2.56212e-188	4.70415e-186	Ctr1B
FBgn0036949	14861.7	12.6473	0.519793	24.3315	9.10242e-131	1.64771e-128	CG7290	X	FBgn0032025	2606.39	8.37747	0.463509	18.074	5.11e-73	8.9e-71	CG7778	X	FBgn0003374	20418	10.8324	0.37016	29.2642	2.96594e-188	5.34473e-186	Sgs4
FBgn0263762	8298.45	11.7373	0.484391	24.231	1.04898e-129	1.86432e-127	CG43679	X	FBgn0016715	2695.03	8.16667	0.454613	17.964	3.73e-72	6.38e-70	Reg-2	X	FBgn0033367	28901.6	7.59101	0.261303	29.0507	1.50953e-185	2.67077e-183	PPO2
FBgn0264695	17245.2	9.85158	0.406743	24.2206	1.34865e-129	2.35411e-127	Mhc	X	FBgn0051439	12424.4	10.9579	0.610111	17.9605	3.97e-72	6.67e-70	Muc96D	X	FBgn0011296	2679.87	7.96966	0.274664	29.016	4.13449e-185	7.18442e-183	l(2)efl
FBgn0035781	3620.48	10.4072	0.430775	24.1591	5.98469e-129	1.02632e-126	CG8560	X	FBgn0262035	4552.34	8.87885	0.495277	17.927	7.25e-72	1.2e-69	CG42846	X	FBgn0038194	3056.39	7.98175	0.275577	28.9638	1.88316e-184	3.21492e-182	Cyp6d5
FBgn0259209	7730.3	8.90246	0.369242	24.1101	1.95785e-128	3.29966e-126	Mlp60A	X	FBgn0028381	3897.28	10.9973	0.615496	17.8674	2.12e-71	3.44e-69	Decay	X	FBgn0038784	4649.82	10.0224	0.346237	28.9467	3.09187e-184	5.18741e-182	CG4362
FBgn0283461	3365.61	8.69748	0.360764	24.1085	2.03415e-128	3.37014e-126	Drs	X	FBgn0052249	39680.4	12.6027	0.710052	17.7489	1.76e-70	2.8e-68	CG32249	X	FBgn0085334	2205.71	7.98448	0.278304	28.6898	5.11476e-181	8.43589e-179	CG34305
FBgn0034903	5781.8	8.131	0.338557	24.0166	1.86387e-127	3.03656e-125	CG9850	X	FBgn0036410	2958.84	9.14383	0.51592	17.7233	2.77e-70	4.35e-68	CG8100	X	FBgn0264750	4536.22	9.10921	0.318367	28.6123	4.72497e-180	7.66312e-178	CG44008
FBgn0014141	4897.28	5.73014	0.239168	23.9587	7.50462e-127	1.20258e-124	cher	X	FBgn0002772	34249.5	8.79059	0.496534	17.7039	3.91e-70	6.04e-68	Mlc1	X	FBgn0035781	8341.99	10.9651	0.384345	28.5293	5.07769e-179	8.10016e-177	CG8560
FBgn0031629	7529.83	8.30894	0.347624	23.9021	2.91601e-126	4.59742e-124	Clect27	X	FBgn0036553	1653.95	8.51237	0.481788	17.6683	7.36e-70	1.12e-67	CG17027	X	FBgn0034291	7562.17	10.059	0.352634	28.5253	5.68403e-179	8.92118e-177	CG5770
FBgn0062412	2625.61	9.16279	0.384098	23.8553	8.91781e-126	1.38368e-123	Ctr1B	X	FBgn0259209	17224.5	9.58978	0.54321	17.6539	9.5e-70	1.42e-67	Mlp60A	X	FBgn0030756	4375.29	10.7238	0.378414	28.3387	1.15309e-176	1.78107e-174	CG9903
FBgn0003372	35302.3	13.159	0.552345	23.8239	1.88958e-125	2.88604e-123	Sgs1	X	FBgn0003357	43998.1	12.5219	0.709376	17.652	9.82e-70	1.44e-67	Jon99Ciii	X	FBgn0039471	14477.2	11.2273	0.398821	28.1512	2.31381e-174	3.51808e-172	CG6295
FBgn0004431	5287.62	9.59835	0.404175	23.748	1.15252e-124	1.73321e-122	LysX	X	FBgn0032824	5679.02	9.98746	0.565918	17.6483	1.05e-69	1.52e-67	CG13962	X	FBgn0040759	2039.91	8.10553	0.288483	28.0971	1.06282e-173	1.59113e-171	CG13177
FBgn0033541	3112.04	9.71194	0.410862	23.638	1.56931e-123	2.32424e-121	CG12934	X	FBgn0005670	3534.47	9.61398	0.546298	17.5984	2.53e-69	3.61e-67	Cyp4d1	X	FBgn0051496	10203	12.1069	0.431094	28.0842	1.52699e-173	2.25139e-171	CG31496
FBgn0010424	10787.1	6.27267	0.26556	23.6205	2.37134e-123	3.45968e-121	TpnC73F	X	FBgn0028544	8994.64	9.77771	0.558615	17.5035	1.35e-68	1.89e-66	CG16884	X	FBgn0039474	13059	11.5067	0.410754	28.0136	1.11076e-172	1.61326e-170	CG6283
FBgn0035667	4200.29	10.8261	0.461526	23.4571	1.11768e-121	1.60666e-119	Jon65Ai	X	FBgn0038194	2892.14	8.54967	0.489396	17.4698	2.43e-68	3.37e-66	Cyp6d5	X	FBgn0000044	107667	8.44814	0.301799	27.9926	2.00012e-172	2.86223e-170	Act57B
FBgn0039474	6853.06	11.3479	0.48383	23.4543	1.19557e-121	1.69372e-119	CG6283	X	FBgn0036362	6586.28	12.1403	0.695083	17.4659	2.6e-68	3.55e-66	CG10725	X	FBgn0040950	5711.59	10.95	0.391302	27.9834	2.58591e-172	3.64688e-170	Muc26B
FBgn0030837	4798.97	10.9997	0.47077	23.3653	9.6338e-121	1.34529e-118	CG8661	X	FBgn0030041	3043.8	7.69883	0.44129	17.4462	3.68e-68	4.95e-66	CG12116	X	FBgn0031653	21966.7	10.4641	0.374907	27.9111	1.95822e-171	2.7222e-169	Jon25Biii
FBgn0004169	6317.85	8.02192	0.346145	23.175	8.13347e-119	1.11978e-116	up	X	FBgn0002562	208197	10.3447	0.593341	17.4346	4.51e-68	5.97e-66	Lsp1alpha	X	FBgn0031747	3976.07	9.33695	0.335007	27.8709	6.01642e-171	8.24588e-169	CG9021
FBgn0053128	9703.75	10.6739	0.463567	23.0256	2.58054e-117	3.50344e-115	CG33128	X	FBgn0037730	2032.94	8.15944	0.469428	17.3817	1.14e-67	1.49e-65	CG9444	X	FBgn0000046	21308	6.61387	0.237909	27.8001	4.33011e-170	5.85226e-168	Act87E
FBgn0040950	8157.29	12.728	0.559589	22.7453	1.59902e-114	2.14115e-112	Muc26B	X	FBgn0014031	1585.29	8.2655	0.478352	17.2791	6.76e-67	8.71e-65	Spat	X	FBgn0030098	9131.58	10.6165	0.382385	27.7639	1.18318e-169	1.5772e-167	CG12057
FBgn0035670	3401.85	7.90488	0.348122	22.7072	3.80401e-114	5.0249e-112	CG10472	X	FBgn0085195	168186	9.47954	0.549808	17.2416	1.3e-66	1.65e-64	CG34166	X	FBgn0015039	19884.2	10.7941	0.392258	27.5178	1.07536e-166	1.4141e-164	Cyp9b2
FBgn0038643	6305.56	10.0007	0.441665	22.6432	1.62693e-113	2.12044e-111	CG14300	X	FBgn0036364	1884.63	8.47717	0.492651	17.2073	2.34e-66	2.94e-64	CG14109	X	FBgn0038646	3274.68	10.352	0.376783	27.4747	3.52726e-166	4.5765e-164	CG7715
FBgn0028533	4686.09	8.92992	0.396131	22.5429	1.57787e-112	2.02943e-110	CG7953	X	FBgn0032669	2194.37	10.0613	0.584893	17.2019	2.57e-66	3.18e-64	CG15155	X	FBgn0010019	2244.77	8.15856	0.297262	27.4457	7.8215e-166	1.00146e-163	Cyp4g1
FBgn0032684	2301.86	8.25255	0.366863	22.4949	4.65459e-112	5.90891e-110	CG10178	X	FBgn0028920	24326.2	11.5877	0.674794	17.1722	4.29e-66	5.24e-64	CG8997	X	FBgn0039482	3863.14	10.3867	0.378846	27.4167	1.73237e-165	2.18931e-163	CG14258
FBgn0035665	51447.9	10.8195	0.482145	22.4403	1.5934e-111	1.99686e-109	Jon65Aiii	X	FBgn0028537	4387.96	9.30757	0.543052	17.1394	7.55e-66	9.11e-64	CG31775	X	FBgn0052656	9768.84	12.2207	0.446514	27.3692	6.38442e-165	7.96497e-163	Muc11A
FBgn0034296	8436.27	11.8097	0.526385	22.4355	1.77326e-111	2.19413e-109	CG10912	X	FBgn0035886	48613.4	12.1831	0.711938	17.1126	1.2e-65	1.42e-63	Jon66Ci	X	FBgn0039311	4167.2	10.9244	0.400537	27.2745	8.50939e-164	1.04816e-161	CG10513
FBgn0015039	12706.8	10.4153	0.464857	22.4053	3.4943e-111	4.2696e-109	Cyp9b2	X	FBgn0035154	13597.7	14.7542	0.868499	16.9881	1.01e-64	1.18e-62	CG3344	X	FBgn0264489	5781.54	7.08784	0.260347	27.2246	3.32017e-163	4.03857e-161	CG43897
FBgn0032075	7558.27	10.5444	0.471254	22.3753	6.8476e-111	8.26361e-109	Tsp29Fb	X	FBgn0043575	15207.2	11.6269	0.688753	16.8811	6.2e-64	7.2e-62	PGRP-SC2	X	FBgn0039897	5108.9	5.81446	0.214152	27.151	2.46247e-162	2.95831e-160	CG1674
FBgn0038194	1756.75	8.90577	0.399082	22.3157	2.60359e-110	3.10368e-108	Cyp6d5	X	FBgn0015039	19213	10.7747	0.638639	16.8714	7.3e-64	8.38e-62	Cyp9b2	X	FBgn0004592	21233.2	10.8031	0.39801	27.1427	3.08751e-162	3.66397e-160	Eig71Ee
FBgn0031249	4010.18	9.8861	0.443276	22.3023	3.50659e-110	4.12975e-108	CG11911	X	FBgn0039682	5632.48	7.79931	0.463737	16.8184	1.79e-63	2.03e-61	Obp99c	X	FBgn0034885	4529.15	7.09866	0.261916	27.1028	9.11872e-162	1.06909e-159	Eglp4
FBgn0038645	3996.57	11.4156	0.517541	22.0573	8.12154e-108	9.45096e-106	CG7714	X	FBgn0266261	5480.7	11.3384	0.674382	16.8131	1.96e-63	2.19e-61	CG44956	X	FBgn0032774	7019.4	5.5858	0.20651	27.0487	3.96137e-161	4.58905e-159	CG17549
FBgn0032773	10079	8.36884	0.379447	22.0553	8.49053e-108	9.76411e-106	fon	X	FBgn0265185	1129.24	8.44024	0.503633	16.7587	4.89e-63	5.42e-61	CG44250	X	FBgn0283479	3061.01	8.29794	0.307728	26.9652	3.7879e-160	4.33648e-158	Alp1
FBgn0051698	16289.9	14.2804	0.647733	22.0467	1.02666e-107	1.16693e-105	CG31698	X	FBgn0004592	24360	12.2671	0.732572	16.7453	6.13e-63	6.66e-61	Eig71Ee	X	FBgn0259950	3232.23	9.73945	0.362714	26.8516	8.08566e-159	9.14902e-157	CG42460
FBgn0036417	5690.07	9.34434	0.423908	22.0433	1.10713e-107	1.24393e-105	CG7906	X	FBgn0022770	3114.26	6.96393	0.415881	16.745	6.16e-63	6.66e-61	Peritrophin-A	X	FBgn0266446	11870.8	9.3214	0.347367	26.8344	1.28178e-158	1.43367e-156	CG45076
FBgn0010425	5008.46	10.1321	0.460451	22.0047	2.5978e-107	2.88563e-105	epsilonTry	X	FBgn0039800	9026.21	9.66189	0.577643	16.7264	8.42e-63	9.01e-61	Npc2g	X	FBgn0027556	4336.65	6.95692	0.261625	26.5912	8.5792e-156	9.48684e-154	CG4928
FBgn0002789	6146.23	6.7722	0.309003	21.9163	1.81541e-106	1.99389e-104	Mp20	X	FBgn0038646	4142.59	10.1643	0.609513	16.676	1.96e-62	2.07e-60	CG7715	X	FBgn0036024	54647.6	11.0216	0.414871	26.5663	1.66575e-155	1.82128e-153	CG18180
FBgn0053306	2678.91	9.36751	0.428544	21.8589	6.3957e-106	6.94644e-104	CG33306	X	FBgn0003374	22567.2	12.2578	0.737118	16.6294	4.27e-62	4.46e-60	Sgs4	X	FBgn0002562	203204	9.18263	0.345847	26.5512	2.4891e-155	2.69127e-153	Lsp1alpha
FBgn0037146	1841.03	8.63537	0.397201	21.7406	8.48141e-105	9.11053e-103	CG7470	X	FBgn0010425	12682.3	12.2344	0.737977	16.5783	1e-61	1.03e-59	epsilonTry	X	FBgn0032069	5410.03	10.9072	0.411848	26.4836	1.49843e-154	1.60233e-152	LManVI
FBgn0000046	17237.6	6.76941	0.311438	21.736	9.37482e-105	9.96075e-103	Act87E	X	FBgn0039778	19672.5	11.1847	0.677171	16.5168	2.78e-61	2.84e-59	Jon99Fi	X	FBgn0035667	5498.51	11.3217	0.427738	26.4689	2.21394e-154	2.33775e-152	Jon65Ai
FBgn0002564	250114	9.38246	0.433776	21.6297	9.43576e-104	9.91769e-102	Lsp1gamma	X	FBgn0283479	2945.41	8.78979	0.53295	16.4927	4.14e-61	4.19e-59	Alp1	X	FBgn0040565	17222.2	10.9924	0.415299	26.4685	2.2342e-154	2.33775e-152	CG7606
FBgn0032069	2914.01	10.8584	0.50343	21.5688	3.52628e-103	3.66696e-101	LManVI	X	FBgn0035915	2153.72	7.73515	0.469324	16.4815	4.98e-61	4.99e-59	S-Lap1	X	FBgn0053196	3459.16	5.09996	0.192823	26.449	3.75005e-154	3.8821e-152	dpy
FBgn0034470	3778.89	5.84734	0.271728	21.5191	1.03224e-102	1.06212e-100	Obp56d	X	FBgn0030539	2975.87	8.13615	0.49368	16.4806	5.06e-61	5.01e-59	CG1368	X	FBgn0053306	3659.84	10.0933	0.381939	26.4264	6.8102e-154	6.97579e-152	CG33306
FBgn0000079	4105.56	8.90269	0.414853	21.4599	3.69487e-102	3.76223e-100	Amy-p	X	FBgn0265356	1900.48	7.18139	0.437075	16.4306	1.16e-60	1.13e-58	tn	X	FBgn0014469	4082.29	7.11508	0.26936	26.4148	9.25812e-154	9.38446e-152	Cyp4e2
FBgn0039161	1727.38	8.97307	0.418411	21.4456	5.02069e-102	5.05951e-100	CG13606	X	FBgn0032773	14574.6	9.30967	0.566725	16.4271	1.22e-60	1.19e-58	fon	X	FBgn0037724	3336.56	10.052	0.38064	26.4082	1.10283e-153	1.10636e-151	Fst
FBgn0028381	2310.07	10.1585	0.476552	21.3167	7.93927e-101	7.91902e-99	Decay	X	FBgn0000639	208517	9.60311	0.584824	16.4205	1.36e-60	1.31e-58	Fbp1	X	FBgn0036951	3420.95	10.2101	0.386745	26.4	1.36869e-153	1.35905e-151	CG7017
FBgn0265180	3976.51	6.1926	0.292231	21.1908	1.16083e-99	1.14618e-97	CG44245	X	FBgn0002773	56141.5	8.69385	0.533951	16.2821	1.32e-59	1.26e-57	Mlc2	X	FBgn0000079	9369.92	9.86478	0.373679	26.399	1.40546e-153	1.38146e-151	Amy-p
FBgn0005670	2818.87	9.13689	0.432139	21.1434	3.17166e-99	3.1003e-97	Cyp4d1	X	FBgn0037146	2449.65	9.05169	0.556638	16.2614	1.86e-59	1.75e-57	CG7470	X	FBgn0003375	23589.4	10.3711	0.393578	26.3509	5.01008e-153	4.87531e-151	Sgs5
FBgn0036422	7535.02	9.99515	0.476547	20.9741	1.13079e-97	1.0944e-95	CG3868	X	FBgn0032638	1043.48	7.57982	0.466322	16.2545	2.08e-59	1.94e-57	SPH93	X	FBgn0041711	3624.78	10.0306	0.38098	26.3283	9.09597e-153	8.76365e-151	yellow-e
FBgn0034031	1576.78	7.13745	0.340581	20.9567	1.631e-97	1.56304e-95	CG12963	X	FBgn0000046	25091.4	6.91983	0.426685	16.2176	3.78e-59	3.49e-57	Act87E	X	FBgn0003377	72996.4	10.5811	0.40281	26.2682	4.42556e-152	4.22207e-150	Sgs7
FBgn0034885	3091.47	6.25017	0.298993	20.9041	4.91812e-97	4.66744e-95	Eglp4	X	FBgn0032538	3056.08	10.8835	0.672549	16.1824	6.71e-59	6.14e-57	CG16885	X	FBgn0032049	5003.04	11.2456	0.428655	26.2347	1.06946e-151	1.01038e-149	Bace
FBgn0033826	4623.07	10.5533	0.50554	20.8753	8.97842e-97	8.43885e-95	CG4734	X	FBgn0283471	26239.3	8.53542	0.527513	16.1805	6.93e-59	6.27e-57	wupA	X	FBgn0028855	3453.95	7.2299	0.275892	26.2055	2.29869e-151	2.15082e-149	CG15282
FBgn0040759	1847.88	8.17276	0.391929	20.8526	1.44248e-96	1.34288e-94	CG13177	X	FBgn0036024	43977.8	12.5012	0.773786	16.1558	1.03e-58	9.26e-57	CG18180	X	FBgn0033968	2786.92	6.54574	0.249929	26.1904	3.41925e-151	3.16883e-149	hui
FBgn0264488	2537.17	10.593	0.509622	20.786	5.79638e-96	5.34525e-94	CG43896	X	FBgn0002563	274862	9.57066	0.594242	16.1057	2.33e-58	2.07e-56	Lsp1beta	X	FBgn0031629	8224.3	7.81082	0.298371	26.1782	4.71006e-151	4.32392e-149	Clect27
FBgn0051901	3254.01	11.12	0.535191	20.7777	6.88935e-96	6.29378e-94	Mur29B	X	FBgn0029762	1473.58	9.98446	0.621933	16.0539	5.37e-58	4.72e-56	NAAT1	X	FBgn0033679	8403.21	8.39047	0.320522	26.1776	4.78626e-151	4.35281e-149	CG8888
FBgn0038646	2715.61	9.59564	0.462519	20.7465	1.31846e-95	1.19333e-93	CG7715	X	FBgn0002789	11851.1	7.64324	0.476298	16.0472	5.98e-58	5.21e-56	Mp20	X	FBgn0283471	24837.9	8.57951	0.328673	26.1035	3.3304e-150	3.00075e-148	wupA
FBgn0037730	1340.07	8.28369	0.399836	20.7177	2.39685e-95	2.14946e-93	CG9444	X	FBgn0033787	3428.33	10.8024	0.673257	16.0449	6.2e-58	5.36e-56	CG13321	X	FBgn0036952	10973.4	10.973	0.420881	26.0716	7.65733e-150	6.8361e-148	CG6933
FBgn0025643	1818.9	8.3929	0.407721	20.5849	3.74843e-94	3.33099e-92	CG3588	X	FBgn0264489	5136.01	6.58058	0.412092	15.9687	2.11e-57	1.81e-55	CG43897	X	FBgn0051698	5608.39	10.7169	0.412185	26.0002	4.92812e-149	4.35959e-147	CG31698
FBgn0032774	5336.26	5.40207	0.262711	20.5628	5.91543e-94	5.20931e-92	CG17549	X	FBgn0034885	5778.07	7.3364	0.459979	15.9494	2.88e-57	2.44e-55	Eglp4	X	FBgn0028534	6079.69	9.98267	0.385244	25.9126	4.7992e-148	4.2073e-146	CG7916
FBgn0040813	3581.1	5.17773	0.251948	20.5508	7.56639e-94	6.6037e-92	Nplp2	X	FBgn0039114	12168.4	6.97633	0.437858	15.9329	3.75e-57	3.15e-55	Lsd-1	X	FBgn0283437	3678.48	5.33708	0.206212	25.8815	1.07616e-147	9.35008e-146	PPO1
FBgn0036471	2502.78	10.6771	0.521193	20.486	2.87286e-93	2.48515e-91	CG13460	X	FBgn0033221	5744.16	8.85376	0.555831	15.9289	4e-57	3.33e-55	CG12825	X	FBgn0043575	16338.1	10.155	0.393842	25.7846	1.32122e-146	1.13777e-144	PGRP-SC2
FBgn0046302	2345.74	7.17543	0.352579	20.3512	4.52701e-92	3.88171e-90	CG10650	X	FBgn0039482	3436.89	8.99636	0.565041	15.9216	4.49e-57	3.71e-55	CG14258	X	FBgn0003357	46854.6	10.5747	0.412071	25.6624	3.07114e-145	2.62151e-143	Jon99Ciii
FBgn0034290	3736.79	8.73952	0.430703	20.2913	1.53562e-91	1.30528e-89	CG5773	X	FBgn0085222	11145.9	9.60765	0.604377	15.8968	6.67e-57	5.46e-55	CG34193	X	FBgn0032144	19254.3	10.409	0.405706	25.6564	3.58741e-145	3.03557e-143	CG17633
FBgn0004430	10917	10.8074	0.535756	20.1723	1.7148e-90	1.44501e-88	LysS	X	FBgn0053514	1679.38	8.10791	0.510925	15.8691	1.04e-56	8.42e-55	CG33514	X	FBgn0031249	7655.74	10.8489	0.422999	25.6476	4.49476e-145	3.77056e-143	CG11911
FBgn0038973	3655.86	9.79847	0.485828	20.1686	1.84844e-90	1.54432e-88	Pebp1	X	FBgn0030102	1251.32	9.64632	0.608282	15.8583	1.23e-56	9.91e-55	SmydA-9	X	FBgn0033222	4262.2	10.3325	0.404435	25.548	5.77818e-144	4.80577e-142	CG12824
FBgn0034292	5710.43	11.5895	0.580461	19.966	1.08765e-88	9.01001e-87	CG5767	X	FBgn0002565	31535.6	8.2184	0.518467	15.8514	1.38e-56	1.1e-54	Lsp2	X	FBgn0034288	5010.47	10.4059	0.408203	25.4919	2.42134e-143	1.99679e-141	CG5084
FBgn0001208	2066.09	8.58014	0.429867	19.96	1.22767e-88	1.00844e-86	Hn	X	FBgn0033139	3304.8	10.5602	0.668075	15.807	2.79e-56	2.2e-54	Tsp42Er	X	FBgn0035409	1309.84	6.43955	0.253584	25.3942	2.92472e-142	2.39163e-140	CG14963
FBgn0034289	5212.52	11.2927	0.565807	19.9585	1.26348e-88	1.02921e-86	CG10910	X	FBgn0024289	938.887	9.08673	0.576485	15.7623	5.65e-56	4.43e-54	Sodh-1	X	FBgn0038973	5140.24	10.2225	0.40478	25.2545	1.01015e-140	8.19146e-139	Pebp1
FBgn0086906	15217.9	6.80535	0.342715	19.8571	9.56098e-88	7.72385e-86	sls	X	FBgn0036985	4586.91	8.41873	0.53582	15.7119	1.25e-55	9.76e-54	zye	X	FBgn0034289	5084.15	10.5726	0.418911	25.2382	1.52487e-140	1.22633e-138	CG10910
FBgn0028920	12636.2	9.57751	0.487887	19.6306	8.47091e-86	6.78715e-84	CG8997	X	FBgn0031248	23967.3	11.897	0.757238	15.7111	1.27e-55	9.8e-54	CG11912	X	FBgn0051778	5177.3	7.97844	0.316701	25.1923	4.86025e-140	3.87665e-138	CG31778
FBgn0035551	5281.32	11.3402	0.580237	19.544	4.63605e-85	3.68434e-83	CG7465	X	FBgn0040609	8503.52	7.3821	0.470277	15.6973	1.58e-55	1.21e-53	CG3348	X	FBgn0038366	1488.76	7.40698	0.296007	25.023	3.43753e-138	2.71956e-136	CG4576
FBgn0036227	1826.08	9.89141	0.506342	19.535	5.5306e-85	4.35981e-83	CG17826	X	FBgn0032280	6814.71	10.2261	0.651528	15.6956	1.62e-55	1.23e-53	CG17105	X	FBgn0002531	96707	9.90569	0.397356	24.929	3.60632e-137	2.83009e-135	Lcp1
FBgn0266448	1765.96	9.59276	0.491153	19.5311	5.97364e-85	4.67139e-83	CG45078	X	FBgn0011296	3446.14	7.93856	0.507206	15.6515	3.24e-55	2.44e-53	l(2)efl	X	FBgn0053514	1564.94	7.95905	0.320617	24.8242	4.91694e-136	3.82774e-134	CG33514
FBgn0035499	18536.6	4.77921	0.244712	19.5299	6.11608e-85	4.74482e-83	Chd64	X	FBgn0034200	1457.26	8.67273	0.555879	15.6018	7.07e-55	5.28e-53	Gbp2	X	FBgn0038009	4757.93	9.2568	0.37393	24.7554	2.71144e-135	2.09405e-133	CG17738
FBgn0033787	2127.3	9.9258	0.509226	19.4919	1.28552e-84	9.89442e-83	CG13321	X	FBgn0036467	13692.6	11.6807	0.750252	15.5691	1.18e-54	8.75e-53	CG12310	X	FBgn0004117	22182.3	8.61183	0.349626	24.6316	5.80021e-134	4.44424e-132	Tm2
FBgn0014368	2519.91	9.42176	0.486279	19.3752	1.24915e-83	9.53944e-82	nol	X	FBgn0036787	1967.84	6.65565	0.42778	15.5586	1.39e-54	1.02e-52	CG4306	X	FBgn0000078	5901.19	10.3627	0.422764	24.5118	1.10488e-132	8.39967e-131	Amy-d
FBgn0265991	7093.63	7.3924	0.383492	19.2766	8.45138e-83	6.40405e-81	Zasp52	X	FBgn0033679	11370.9	8.15578	0.524377	15.5533	1.51e-54	1.1e-52	CG8888	X	FBgn0034031	2222.6	8.45077	0.344777	24.5108	1.13193e-132	8.53864e-131	CG12963
FBgn0039471	8838.01	10.9742	0.570293	19.2431	1.61312e-82	1.21295e-80	CG6295	X	FBgn0041711	3637.41	9.10318	0.585535	15.5468	1.67e-54	1.21e-52	yellow-e	X	FBgn0086906	16940.8	7.11667	0.292169	24.3581	4.76047e-131	3.5634e-129	sls
FBgn0024289	1098.94	8.35601	0.435289	19.1964	3.9636e-82	2.95757e-80	Sodh-1	X	FBgn0028396	7466.66	9.5437	0.6152	15.5132	2.83e-54	2.03e-52	TotA	X	FBgn0020508	4158.06	9.12175	0.374904	24.3309	9.23866e-131	6.8627e-129	Ag5r2
FBgn0036181	6421.08	10.9544	0.571709	19.1608	7.86686e-82	5.82565e-80	Muc68Ca	X	FBgn0030073	2111.86	8.42902	0.543395	15.5118	2.89e-54	2.06e-52	CG10962	X	FBgn0039151	3202.37	6.63441	0.272966	24.305	1.73763e-130	1.28097e-128	CG13607
FBgn0030999	7678.42	13.6404	0.713478	19.1181	1.78441e-81	1.31148e-79	Mur18B	X	FBgn0034999	3251.16	7.31079	0.471462	15.5066	3.13e-54	2.21e-52	CG3394	X	FBgn0031580	2461.22	10.5231	0.433049	24.3	1.96005e-130	1.43408e-128	CG15423
FBgn0000078	2272.27	9.26263	0.484626	19.1129	1.97061e-81	1.43751e-79	Amy-d	X	FBgn0032069	2991.41	10.7352	0.694157	15.4651	5.97e-54	4.19e-52	LManVI	X	FBgn0036996	8330.57	10.6798	0.43965	24.2915	2.40957e-130	1.74982e-128	mag
FBgn0031517	1355.55	9.14613	0.478722	19.1053	2.27984e-81	1.65077e-79	CG15406	X	FBgn0030688	1105.14	9.02062	0.583468	15.4603	6.43e-54	4.48e-52	CG8952	X	FBgn0033541	1863.09	9.15906	0.377733	24.2475	7.03105e-130	5.06808e-128	CG12934
FBgn0035090	3583.96	9.0912	0.476312	19.0866	3.26062e-81	2.34357e-79	CG2736	X	FBgn0040827	18850.3	9.79118	0.635428	15.4088	1.43e-53	9.89e-52	CG13315	X	FBgn0035743	2180.72	9.94212	0.411233	24.1764	3.94247e-129	2.8209e-127	CG15829
FBgn0028534	4128.25	9.80435	0.515812	19.0076	1.47587e-80	1.05304e-78	CG7916	X	FBgn0036877	1434.43	9.29713	0.60411	15.3898	1.92e-53	1.32e-51	CG9452	X	FBgn0038294	22593.9	7.7615	0.321333	24.1541	6.76819e-129	4.80739e-127	Mf
FBgn0035091	880.026	6.30319	0.33257	18.953	4.17251e-80	2.95553e-78	CG3829	X	FBgn0016675	1842.84	9.16687	0.596145	15.3769	2.34e-53	1.6e-51	Lectin-galC1	X	FBgn0028381	3394.62	10.2608	0.425291	24.1266	1.31333e-128	9.26087e-127	Decay
FBgn0031248	13771	9.47885	0.501068	18.9173	8.21453e-80	5.77677e-78	CG11912	X	FBgn0040682	8242.29	8.88469	0.578096	15.3689	2.65e-53	1.79e-51	CG14664	X	FBgn0031654	3556.51	9.78604	0.406234	24.0897	3.20641e-128	2.24472e-126	Jon25Bii
FBgn0260995	1631.57	-5.29679	0.280776	-18.8648	2.22108e-79	1.55079e-77	dpr21	X	FBgn0050360	1996.2	9.43475	0.61645	15.305	7.08e-53	4.76e-51	Mal-A6	X	FBgn0028544	7524.32	8.7007	0.3621	24.0285	1.40247e-127	9.74815e-126	CG16884
FBgn0028939	1740.79	9.81536	0.520319	18.8641	2.25036e-79	1.56009e-77	NimC2	X	FBgn0036875	4355.18	6.71197	0.438818	15.2956	8.18e-53	5.46e-51	CG9449	X	FBgn0039778	11884.9	9.88708	0.414737	23.8394	1.30551e-125	9.00989e-124	Jon99Fi
FBgn0032287	1283.03	8.86021	0.470091	18.8479	3.05974e-79	2.10627e-77	CG6415	X	FBgn0031580	4917.57	12.9259	0.845943	15.2799	1.04e-52	6.9e-51	CG15423	X	FBgn0036106	1716.19	9.00135	0.378641	23.7728	6.38423e-125	4.375e-123	CG6409
FBgn0034860	3247.59	5.31161	0.281874	18.8439	3.29634e-79	2.25327e-77	CG9812	X	FBgn0014000	1174.7	9.5475	0.627865	15.2063	3.21e-52	2.11e-50	Hf	X	FBgn0032284	4844.41	8.62665	0.363077	23.7598	8.69492e-125	5.9168e-123	CG7294
FBgn0063497	6547.59	6.49793	0.34604	18.778	1.14299e-78	7.75883e-77	GstE3	X	FBgn0031517	1902.67	10.7667	0.714848	15.0616	2.9e-51	1.89e-49	CG15406	X	FBgn0032068	3522.97	11.3484	0.477707	23.756	9.53507e-125	6.44345e-123	LManV
FBgn0259950	4687.91	10.2732	0.547826	18.7527	1.83955e-78	1.24011e-76	CG42460	X	FBgn0034435	917.71	6.75362	0.450222	15.0006	7.27e-51	4.72e-49	fest	X	FBgn0033268	38775	-5.51792	0.232342	-23.7491	1.12148e-124	7.5263e-123	Obp44a
FBgn0002563	242605	8.93075	0.476611	18.738	2.42445e-78	1.62322e-76	Lsp1beta	X	FBgn0033954	2563.94	11.208	0.753302	14.8786	4.54e-50	2.93e-48	CG12860	X	FBgn0036471	6592.9	11.8974	0.501599	23.7189	2.30118e-124	1.53303e-122	CG13460
FBgn0030097	1480.98	8.99366	0.481929	18.6618	1.01257e-77	6.73327e-76	CG12115	X	FBgn0052695	2007.98	9.11039	0.614231	14.8322	9.07e-50	5.81e-48	CG32695	X	FBgn0038943	5505.02	9.41768	0.397058	23.7186	2.31585e-124	1.53303e-122	CG5391
FBgn0037065	2525.72	7.31303	0.391922	18.6594	1.05883e-77	6.99326e-76	CG12974	X	FBgn0039239	1443.39	9.07248	0.611778	14.8297	9.41e-50	5.99e-48	CG13641	X	FBgn0035670	6424.12	9.2607	0.390721	23.7016	3.47175e-124	2.28268e-122	CG10472
FBgn0032049	2433.77	10.8296	0.582363	18.5959	3.46834e-77	2.27537e-75	Bace	X	FBgn0031542	776.842	7.5616	0.510375	14.8158	1.16e-49	7.32e-48	CG15414	X	FBgn0028920	12719.7	9.75448	0.411994	23.6762	6.33693e-124	4.13857e-122	CG8997
FBgn0002578	1274.24	9.40169	0.506387	18.5662	6.03071e-77	3.93001e-75	Kaz-m1	X	FBgn0040349	1192.2	10.6491	0.719118	14.8085	1.29e-49	8.1e-48	CG3699	X	FBgn0003388	1283.96	7.90816	0.33409	23.6707	7.22306e-124	4.68584e-122	shd
FBgn0044048	3289.53	-4.82548	0.260148	-18.549	8.30851e-77	5.37852e-75	Ilp5	X	FBgn0039755	872.277	8.66564	0.588335	14.7291	4.19e-49	2.61e-47	CG15531	X	FBgn0038719	2803.55	10.2057	0.432307	23.6077	3.21594e-123	2.07247e-121	CG16727
FBgn0000639	230528	9.061	0.490072	18.4891	2.52653e-76	1.62479e-74	Fbp1	X	FBgn0033725	88365	6.52151	0.442884	14.7251	4.45e-49	2.75e-47	Cpr49Ac	X	FBgn0010358	2232.44	10.065	0.427522	23.5427	1.49219e-122	9.55294e-121	deltaTry
FBgn0038774	5522.24	9.29712	0.504629	18.4237	8.48371e-76	5.42015e-74	CG5023	X	FBgn0034437	1032.6	9.11088	0.619316	14.7112	5.46e-49	3.36e-47	CG10051	X	FBgn0051004	1290.2	8.73308	0.371766	23.4908	5.06341e-122	3.2204e-120	mesh
FBgn0022770	1823.67	5.70839	0.311207	18.3427	3.773e-75	2.39488e-73	Peritrophin-A	X	FBgn0010358	3751.43	12.5341	0.853769	14.6809	8.55e-49	5.22e-47	deltaTry	X	FBgn0003356	43512.8	10.3807	0.442134	23.4786	6.74571e-122	4.2625e-120	Jon99Cii
FBgn0032068	1408.46	9.96723	0.543697	18.3323	4.57115e-75	2.88277e-73	LManV	X	FBgn0040350	739.787	8.56652	0.583532	14.6805	8.6e-49	5.22e-47	CG3690	X	FBgn0086675	13979.6	-4.3072	0.183643	-23.4542	1.19756e-121	7.51833e-120	fne
FBgn0031560	1069.71	7.47522	0.408362	18.3054	7.49575e-75	4.69686e-73	CG16713	X	FBgn0270925	1777.31	8.14797	0.555241	14.6747	9.37e-49	5.65e-47	CG4836	X	FBgn0003358	1871.9	9.90622	0.426617	23.2204	2.83211e-119	1.76662e-117	Jon99Ci
FBgn0040609	2071.56	5.54204	0.302851	18.2995	8.3444e-75	5.19532e-73	CG3348	X	FBgn0004577	1672.85	8.57216	0.585406	14.6431	1.49e-48	8.94e-47	Pxd	X	FBgn0036467	6439.58	10.2334	0.441907	23.1574	1.22548e-118	7.59562e-117	CG12310
FBgn0034052	1408.14	10.0189	0.548093	18.2796	1.20397e-74	7.44863e-73	CG8299	X	FBgn0040398	12760.5	6.41682	0.43852	14.6329	1.73e-48	1.03e-46	CG14629	X	FBgn0039312	2743.78	10.6074	0.459597	23.0797	7.40914e-118	4.56319e-116	CG10514
FBgn0037447	2328.98	6.76369	0.372636	18.1509	1.26305e-73	7.76499e-72	Neurochondrin	X	FBgn0036417	7410.8	8.60227	0.588233	14.6239	1.98e-48	1.17e-46	CG7906	X	FBgn0039299	9171.44	9.49329	0.412284	23.0261	2.55355e-117	1.56281e-115	CG11854
FBgn0035915	1936.9	7.40706	0.408379	18.1377	1.6058e-73	9.81042e-72	S-Lap1	X	FBgn0036416	24834.3	9.69655	0.663554	14.6131	2.32e-48	1.36e-46	CG7924	X	FBgn0034052	2572.36	11.0285	0.479227	23.0131	3.44913e-117	2.09771e-115	CG8299
FBgn0030102	855.505	8.1445	0.451589	18.0352	1.03122e-72	6.26097e-71	SmydA-9	X	FBgn0028543	1617.71	7.17901	0.49266	14.5719	4.24e-48	2.48e-46	NimB2	X	FBgn0014141	4898.93	5.01793	0.219602	22.8501	1.45685e-115	8.80536e-114	cher
FBgn0270925	1946.39	10.3195	0.572492	18.0255	1.22816e-72	7.41063e-71	CG4836	X	FBgn0038647	2729.45	9.65693	0.665824	14.5037	1.15e-47	6.67e-46	CG14302	X	FBgn0031248	16425.8	9.88547	0.433079	22.826	2.52897e-115	1.5191e-113	CG11912
FBgn0038074	1032.28	7.98301	0.443433	18.0027	1.85451e-72	1.11214e-70	Gnmt	X	FBgn0028939	1700.3	7.61312	0.52616	14.4692	1.9e-47	1.09e-45	NimC2	X	FBgn0039154	815.449	6.87263	0.302164	22.7447	1.61997e-114	9.67111e-113	Npc2f
FBgn0030928	1473.19	10.4051	0.579316	17.9611	3.92975e-72	2.34228e-70	CG15044	X	FBgn0039798	892.797	6.97835	0.482278	14.4696	1.89e-47	1.09e-45	CG11313	X	FBgn0034901	20739.5	12.071	0.531169	22.7254	2.51415e-114	1.49178e-112	CG11300
FBgn0034741	1024.66	8.21136	0.457522	17.9475	5.02245e-72	2.97542e-70	CG4269	X	FBgn0039897	6093.26	5.18434	0.358641	14.4555	2.31e-47	1.32e-45	CG1674	X	FBgn0033978	1779.35	8.46395	0.373089	22.6862	6.13478e-114	3.61803e-112	Cyp6a23
FBgn0052405	832.924	8.21601	0.457955	17.9406	5.68019e-72	3.34481e-70	Cpr65Av	X	FBgn0041710	4688.7	7.57721	0.524704	14.4409	2.86e-47	1.62e-45	yellow-f	X	FBgn0266448	3613.59	9.13345	0.403084	22.6589	1.1389e-113	6.67629e-112	CG45078
FBgn0033286	1156.64	8.09706	0.452677	17.887	1.48815e-71	8.71055e-70	CG2127	X	FBgn0015011	1261.21	5.73046	0.39684	14.4402	2.89e-47	1.63e-45	AhcyL2	X	FBgn0264488	2310.55	10.7539	0.476006	22.592	5.19737e-113	3.02848e-111	CG43896
FBgn0033268	100547	-6.30956	0.3529	-17.8792	1.71382e-71	9.97178e-70	Obp44a	X	FBgn0035499	29031.9	5.72698	0.396909	14.429	3.4e-47	1.91e-45	Chd64	X	FBgn0040827	14840.2	8.8169	0.390286	22.5908	5.33146e-113	3.08812e-111	CG13315
FBgn0030051	2278.21	5.55175	0.310865	17.8591	2.45773e-71	1.42156e-69	spirit	X	FBgn0028491	1312.36	6.78032	0.470056	14.4245	3.63e-47	2.02e-45	CG2930	X	FBgn0038819	2575.97	10.8964	0.482818	22.5683	8.87847e-113	5.11221e-111	Cpr92F
FBgn0039682	3908.58	7.61804	0.427977	17.8001	7.0521e-71	4.05496e-69	Obp99c	X	FBgn0040759	4205.87	8.89642	0.61725	14.413	4.29e-47	2.36e-45	CG13177	X	FBgn0259795	2028.64	10.0664	0.447685	22.4854	5.7625e-112	3.29852e-110	loopin-1
FBgn0036106	1159.32	9.50211	0.533937	17.7963	7.54655e-71	4.31389e-69	CG6409	X	FBgn0053493	1617.19	6.45243	0.447676	14.4132	4.28e-47	2.36e-45	CG33493	X	FBgn0032665	1702.63	10.2007	0.453963	22.4703	8.11048e-112	4.61538e-110	CG15152
FBgn0001285	1545.02	10.5124	0.593025	17.7268	2.60611e-70	1.48109e-68	Jon44E	X	FBgn0038181	1824.61	8.16061	0.566221	14.4124	4.32e-47	2.37e-45	CG9297	X	FBgn0020906	6824.66	10.5218	0.469703	22.4009	3.85639e-111	2.18177e-109	Jon25Bi
FBgn0038784	2937.54	7.98836	0.451734	17.6838	5.59431e-70	3.16094e-68	CG4362	X	FBgn0267726	2299.82	9.46925	0.657043	14.4119	4.35e-47	2.37e-45	CG46059	X	FBgn0030928	2179.08	10.2936	0.460333	22.3613	9.37278e-111	5.27205e-109	CG15044
FBgn0034710	1555.5	8.765	0.497363	17.6229	1.64266e-69	9.22816e-68	CG3292	X	FBgn0034907	678.772	8.47923	0.5889	14.3984	5.29e-47	2.86e-45	CG5539	X	FBgn0035427	2210.53	7.28161	0.325717	22.3556	1.06462e-110	5.9539e-109	ckd
FBgn0262035	2318.74	8.31844	0.472056	17.6217	1.67778e-69	9.37161e-68	CG42846	X	FBgn0004169	6611.1	7.85511	0.546261	14.3798	6.93e-47	3.73e-45	up	X	FBgn0035542	8404.7	3.7747	0.16928	22.2986	3.81288e-110	2.12018e-108	DOR
FBgn0035743	2768.92	10.7888	0.612265	17.6211	1.69591e-69	9.41903e-68	CG15829	X	FBgn0034497	1165.75	9.01513	0.627377	14.3695	8.04e-47	4.3e-45	CG9090	X	FBgn0036181	6451.8	10.6726	0.479293	22.2674	7.6538e-110	4.23177e-108	Muc68Ca
FBgn0264750	4009.42	8.83572	0.502703	17.5764	3.73509e-69	2.06274e-67	CG44008	X	FBgn0034741	1928.65	8.30416	0.579344	14.3337	1.35e-46	7.16e-45	CG4269	X	FBgn0033139	1576.11	8.51056	0.382334	22.2595	9.12519e-110	5.01679e-108	Tsp42Er
FBgn0039311	1963.13	9.23367	0.525388	17.575	3.83095e-69	2.1038e-67	CG10513	X	FBgn0001208	2753.02	8.51404	0.594876	14.3123	1.83e-46	9.7e-45	Hn	X	FBgn0022770	2538.19	6.3596	0.286522	22.1958	3.76886e-109	2.06038e-107	Peritrophin-A
FBgn0265356	1442.09	7.35507	0.419179	17.5464	6.34086e-69	3.46268e-67	tn	X	FBgn0038250	1480.77	6.26075	0.44154	14.1793	1.23e-45	6.47e-44	CG3505	X	FBgn0036875	4853	7.47308	0.337428	22.1472	1.11048e-108	6.03689e-107	CG9449
FBgn0036985	4700.16	8.21389	0.468974	17.5146	1.10857e-68	6.02015e-67	zye	X	FBgn0034010	1515.56	6.97261	0.492204	14.1661	1.49e-45	7.77e-44	CG8157	X	FBgn0002772	27875.6	8.61717	0.389527	22.1221	1.93664e-108	1.04697e-106	Mlc1
FBgn0086691	3019.11	4.52441	0.258595	17.4961	1.53483e-68	8.2889e-67	UK114	X	FBgn0004431	7269.32	9.6032	0.679362	14.1356	2.29e-45	1.19e-43	LysX	X	FBgn0002563	357962	9.21414	0.416888	22.1022	3.00867e-108	1.61754e-106	Lsp1beta
FBgn0030756	2309.53	10.2711	0.587305	17.4885	1.75331e-68	9.4168e-67	CG9903	X	FBgn0027556	6094.13	6.63655	0.469594	14.1325	2.39e-45	1.23e-43	CG4928	X	FBgn0036364	920.431	6.65658	0.30183	22.0541	8.72812e-108	4.66667e-106	CG14109
FBgn0021776	1979.35	-5.68885	0.325439	-17.4806	2.01544e-68	1.07655e-66	mira	X	FBgn0032652	1315.79	8.85933	0.62688	14.1324	2.4e-45	1.23e-43	CG6870	X	FBgn0001114	4172.94	5.69454	0.260496	21.8604	6.19049e-106	3.29178e-104	Glt
FBgn0029990	38030.6	9.1563	0.524213	17.4668	2.56706e-68	1.36375e-66	CG2233	X	FBgn0038943	16573.2	8.78948	0.623077	14.1066	3.46e-45	1.77e-43	CG5391	X	FBgn0036264	1161.29	6.97927	0.319753	21.8271	1.28331e-105	6.7869e-104	CG11529
FBgn0036945	3064.5	5.86305	0.337463	17.3739	1.30137e-67	6.87618e-66	Ssk	X	FBgn0033953	1406.75	9.69381	0.689194	14.0654	6.19e-45	3.13e-43	CG12861	X	FBgn0259209	12184.4	8.65871	0.397094	21.8052	2.07178e-105	1.08976e-103	Mlp60A
FBgn0033137	5469.01	7.77127	0.449981	17.2702	7.88259e-67	4.1426e-65	Tsp42Ep	X	FBgn0038292	867.259	6.54465	0.465294	14.0656	6.18e-45	3.13e-43	CG3987	X	FBgn0010482	1618.26	6.03219	0.277758	21.7174	1.40548e-104	7.35306e-103	l(2)01289
FBgn0020906	5747.99	10.9741	0.635829	17.2596	9.47839e-67	4.95461e-65	Jon25Bi	X	FBgn0015037	772.655	7.03163	0.500572	14.0472	8.01e-45	4.03e-43	Cyp4p1	X	FBgn0046302	2822.8	7.17765	0.331258	21.6679	4.12466e-104	2.14637e-102	CG10650
FBgn0033366	1049.42	5.80745	0.336765	17.2448	1.22432e-66	6.3658e-65	Ance-4	X	FBgn0050029	8691.18	9.0839	0.648193	14.0142	1.28e-44	6.39e-43	CR30029	X	FBgn0038774	11275.7	9.78342	0.451732	21.6576	5.15832e-104	2.66998e-102	CG5023
FBgn0035985	1434.64	7.75138	0.450146	17.2197	1.88965e-66	9.77317e-65	Cpr67B	X	FBgn0034860	4759.56	5.83555	0.416437	14.013	1.3e-44	6.46e-43	CG9812	X	FBgn0038312	1883.37	4.63027	0.21396	21.6408	7.41819e-104	3.79928e-102	Zip88E
FBgn0261561	843.944	6.96482	0.404655	17.2118	2.16768e-66	1.11522e-64	CG42675	X	FBgn0052652	1022.94	7.55065	0.539028	14.0079	1.39e-44	6.91e-43	CR32652	X	FBgn0038845	2543.26	11.1385	0.514696	21.6409	7.40695e-104	3.79928e-102	CG10827
FBgn0004240	2762.43	10.8418	0.63096	17.1831	3.55516e-66	1.81946e-64	DptA	X	FBgn0010423	3159.91	7.85318	0.562921	13.9508	3.11e-44	1.53e-42	TpnC47D	X	FBgn0051901	3888.19	10.3324	0.477669	21.6309	9.19038e-104	4.68228e-102	Mur29B
FBgn0031512	1576	10.5289	0.613606	17.1591	5.37267e-66	2.73531e-64	CG15404	X	FBgn0034394	625.331	7.1981	0.516174	13.9451	3.37e-44	1.65e-42	CG15096	X	FBgn0033124	2105.93	10.2053	0.47213	21.6154	1.28744e-103	6.52506e-102	Tsp42Ec
FBgn0034291	7287.19	10.2357	0.597084	17.1429	7.1053e-66	3.59867e-64	CG5770	X	FBgn0038095	957.212	8.07973	0.580194	13.9259	4.41e-44	2.15e-42	Cyp304a1	X	FBgn0028533	4545.04	8.9464	0.414523	21.5824	2.62888e-103	1.32547e-101	CG7953
FBgn0052302	2471.71	9.98183	0.582474	17.137	7.86549e-66	3.96315e-64	CG32302	X	FBgn0025620	1170.77	7.71631	0.554391	13.9185	4.89e-44	2.37e-42	CG13360	X	FBgn0026197	45177.9	-4.02793	0.186842	-21.5579	4.46488e-103	2.23958e-101	noe
FBgn0030539	1474.29	7.99579	0.467658	17.0975	1.54879e-65	7.76381e-64	CG1368	X	FBgn0052603	4034.11	13.0011	0.934368	13.9143	5.18e-44	2.5e-42	CG32603	X	FBgn0051789	2523.07	9.42624	0.437832	21.5293	8.27166e-103	4.12777e-101	CG31789
FBgn0036493	6097.57	8.46154	0.494939	17.0961	1.58558e-65	7.90766e-64	CG7255	X	FBgn0033999	815.017	8.9965	0.64675	13.9103	5.48e-44	2.63e-42	CG8093	X	FBgn0038756	956.462	7.15177	0.332206	21.5281	8.49312e-103	4.21666e-101	CG4783
FBgn0020508	5024.53	8.79081	0.514475	17.087	1.85622e-65	9.21044e-64	Ag5r2	X	FBgn0029835	1114.17	7.67487	0.551774	13.9094	5.55e-44	2.65e-42	CG5921	X	FBgn0034437	1341.76	9.58281	0.447157	21.4305	6.94029e-102	3.42822e-100	CG10051
FBgn0015011	812.357	6.02354	0.352583	17.084	1.95118e-65	9.6327e-64	AhcyL2	X	FBgn0034472	1341.98	9.43484	0.679756	13.8797	8.4e-44	4e-42	CG8517	X	FBgn0036953	1401.77	10.0319	0.46921	21.3803	2.03753e-101	1.00137e-99	CG17145
FBgn0033999	746.094	8.68661	0.50875	17.0744	2.30084e-65	1.13019e-63	CG8093	X	FBgn0033788	3156.03	10.4465	0.753004	13.8731	9.21e-44	4.36e-42	CG13323	X	FBgn0034712	2939.64	5.02818	0.236102	21.2966	1.22039e-100	5.96766e-99	CG3264
FBgn0032025	2071.9	8.46744	0.497149	17.032	4.75415e-65	2.32359e-63	CG7778	X	FBgn0086906	22866.4	6.85618	0.494492	13.8651	1.03e-43	4.85e-42	sls	X	FBgn0050163	946.021	7.73705	0.364317	21.2371	4.33483e-100	2.10911e-98	Cpr60D
FBgn0036940	1166.85	10.038	0.591582	16.9681	1.41506e-64	6.88171e-63	obst-J	X	FBgn0035409	1661.39	6.25273	0.452788	13.8094	2.24e-43	1.05e-41	CG14963	X	FBgn0003889	1866.26	6.55801	0.309679	21.1768	1.56329e-99	7.56834e-98	betaTub85D
FBgn0050345	965.57	7.525	0.444642	16.9237	3.00711e-64	1.45517e-62	CG30345	X	FBgn0028513	1253.46	7.14184	0.517237	13.8077	2.29e-43	1.07e-41	CG9254	X	FBgn0005666	11626.5	7.35223	0.347341	21.1672	1.91796e-99	9.23945e-98	bt
FBgn0038509	1198.79	10.2859	0.609258	16.8827	6.02997e-64	2.90359e-62	CG14332	X	FBgn0037114	77172.5	7.98565	0.578548	13.8029	2.45e-43	1.14e-41	Cpr78E	X	FBgn0028513	965.652	7.59966	0.360114	21.1035	7.3881e-99	3.5242e-97	CG9254
FBgn0039091	806.796	8.729	0.517895	16.8548	9.67575e-64	4.6363e-62	CG10182	X	FBgn0000615	1690.33	5.26039	0.381431	13.7912	2.88e-43	1.33e-41	exu	X	FBgn0034903	5763.2	8.17951	0.387588	21.1036	7.37045e-99	3.5242e-97	CG9850
FBgn0035770	1032.78	4.92942	0.292503	16.8525	1.00548e-63	4.79442e-62	pst	X	FBgn0051004	735.04	8.05869	0.584559	13.7859	3.1e-43	1.42e-41	mesh	X	FBgn0015037	705.515	7.87271	0.373361	21.0861	1.06785e-98	5.06889e-97	Cyp4p1
FBgn0031913	11287.4	8.9117	0.528871	16.8504	1.04158e-63	4.94244e-62	CG5958	X	FBgn0031865	1346.11	7.08824	0.514521	13.7764	3.54e-43	1.62e-41	Nha1	X	FBgn0032235	1063.95	4.80724	0.228241	21.0622	1.76831e-98	8.35313e-97	CG5096
FBgn0027111	10224.3	-4.48919	0.266655	-16.8352	1.34682e-63	6.35996e-62	miple1	X	FBgn0033294	718.194	6.54632	0.475265	13.774	3.65e-43	1.66e-41	Mal-A4	X	FBgn0002578	2166.24	11.0268	0.523609	21.0592	1.88227e-98	8.84847e-97	Kaz-m1
FBgn0005666	11641.3	7.32506	0.435317	16.8269	1.54895e-63	7.27932e-62	bt	X	FBgn0035988	756.43	6.30464	0.458048	13.7641	4.19e-43	1.9e-41	CG3982	X	FBgn0033286	1323.97	6.13886	0.291525	21.0577	1.94204e-98	9.08557e-97	CG2127
FBgn0033139	1530.43	9.55298	0.568552	16.8023	2.34795e-63	1.09814e-61	Tsp42Er	X	FBgn0259716	902.522	9.05031	0.658696	13.7397	5.87e-43	2.64e-41	CG42370	X	FBgn0038181	2367.74	7.53652	0.358321	21.0329	3.28144e-98	1.52783e-96	CG9297
FBgn0039151	2269.78	6.84954	0.40779	16.7967	2.57883e-63	1.20038e-61	CG13607	X	FBgn0052351	1084.29	7.80797	0.568337	13.7383	5.99e-43	2.68e-41	S-Lap2	X	FBgn0039777	4873.92	9.90978	0.471201	21.0309	3.42251e-98	1.58593e-96	Jon99Fii
FBgn0265185	813.667	8.85869	0.527466	16.7948	2.66381e-63	1.23406e-61	CG44250	X	FBgn0005666	14041.2	7.1954	0.524046	13.7305	6.67e-43	2.98e-41	bt	X	FBgn0039313	1311.16	9.56737	0.455163	21.0197	4.33478e-98	1.99914e-96	CG11892
FBgn0003863	7451.1	12.1374	0.722908	16.7896	2.90617e-63	1.33999e-61	alphaTry	X	FBgn0025454	2601.02	7.63646	0.556347	13.7261	7.09e-43	3.15e-41	Cyp6g1	X	FBgn0040682	3084.34	8.28698	0.394962	20.9817	9.63855e-98	4.42419e-96	CG14664
FBgn0033133	3963.09	6.12022	0.365841	16.7292	8.0311e-63	3.68563e-61	Tsp42Ek	X	FBgn0050047	638.355	7.07227	0.51581	13.711	8.73e-43	3.86e-41	CG30047	X	FBgn0261341	7753.85	3.72857	0.177938	20.9543	1.71399e-97	7.83043e-96	verm
FBgn0040349	799.349	7.95166	0.476365	16.6924	1.48933e-62	6.80289e-61	CG3699	X	FBgn0033292	801.415	10.0891	0.736874	13.6918	1.14e-42	5e-41	Cyp4ad1	X	FBgn0035770	1677.51	5.00981	0.239362	20.9299	2.86181e-97	1.30132e-95	pst
FBgn0031089	1013.89	6.68892	0.400915	16.6841	1.71028e-62	7.77581e-61	CG9572	X	FBgn0035176	1160.31	7.6998	0.562394	13.6911	1.15e-42	5.02e-41	CG13905	X	FBgn0039475	2497.9	9.84022	0.470527	20.9132	4.06111e-97	1.83808e-95	CG6277
FBgn0010019	1552.88	8.3466	0.501282	16.6505	3.00088e-62	1.35804e-60	Cyp4g1	X	FBgn0030697	613.628	8.83683	0.645635	13.687	1.21e-42	5.29e-41	CG8565	X	FBgn0004577	1962.86	9.53233	0.457174	20.8506	1.50656e-96	6.78721e-95	Pxd
FBgn0011296	2147.85	7.11938	0.428546	16.6129	5.62284e-62	2.53287e-60	l(2)efl	X	FBgn0039030	879.849	7.6198	0.55694	13.6816	1.31e-42	5.68e-41	CG6660	X	FBgn0003372	20557.8	10.8292	0.519836	20.8321	2.21674e-96	9.94058e-95	Sgs1
FBgn0034200	948.132	8.4892	0.51112	16.609	5.99744e-62	2.68922e-60	Gbp2	X	FBgn0024361	717.952	7.19373	0.526821	13.655	1.89e-42	8.14e-41	Tsp2A	X	FBgn0038718	1756.45	10.7246	0.515352	20.8102	3.49919e-96	1.56196e-94	CG17752
FBgn0020506	1192.74	10.03	0.605955	16.5525	1.53709e-61	6.86076e-60	Amyrel	X	FBgn0003507	1025.59	5.76226	0.422648	13.6337	2.52e-42	1.08e-40	srp	X	FBgn0035985	866.25	7.79449	0.376026	20.7286	1.91321e-95	8.50112e-94	Cpr67B
FBgn0267366	680.496	7.61931	0.461886	16.4961	3.91428e-61	1.73919e-59	mil	X	FBgn0035090	3498.03	9.58756	0.703764	13.6233	2.91e-42	1.25e-40	CG2736	X	FBgn0002440	1130.15	8.00545	0.387095	20.6808	5.15442e-95	2.27989e-93	l(3)mbn
FBgn0014000	676.673	8.50481	0.515894	16.4856	4.6585e-61	2.06049e-59	Hf	X	FBgn0036945	4849.26	6.32975	0.464699	13.6212	3e-42	1.28e-40	Ssk	X	FBgn0039670	18976.5	11.3749	0.550208	20.6739	5.94844e-95	2.6192e-93	CG7567
FBgn0025712	4038.31	-4.35839	0.264937	-16.4507	8.29505e-61	3.65244e-59	CG13920	X	FBgn0030148	504.043	8.68456	0.637965	13.6129	3.36e-42	1.42e-40	CG3106	X	FBgn0036553	1003.66	8.25189	0.399217	20.6702	6.42744e-95	2.81736e-93	CG17027
FBgn0041711	2441.07	10.0779	0.614185	16.4086	1.66039e-60	7.27815e-59	yellow-e	X	FBgn0036181	3134.75	10.9156	0.802464	13.6027	3.86e-42	1.63e-40	Muc68Ca	X	FBgn0033919	4538.31	3.82396	0.18545	20.6199	1.81873e-94	7.93635e-93	CG8547
FBgn0036766	728.097	8.68368	0.5296	16.3967	2.01935e-60	8.81211e-59	CG5506	X	FBgn0031129	789.903	8.8401	0.650421	13.5913	4.51e-42	1.89e-40	CG1324	X	FBgn0265356	1797.24	7.63103	0.370372	20.6037	2.5426e-94	1.10455e-92	tn
FBgn0003162	5336.25	5.20205	0.31798	16.3597	3.71092e-60	1.61219e-58	Pu	X	FBgn0265991	7266.14	6.80338	0.500962	13.5806	5.22e-42	2.18e-40	Zasp52	X	FBgn0010424	12378.2	6.59338	0.320937	20.5442	8.68161e-94	3.7547e-92	TpnC73F
FBgn0030259	1554.87	-4.91077	0.300558	-16.3389	5.22223e-60	2.25873e-58	CG1545	X	FBgn0035360	1283.87	7.03702	0.519224	13.553	7.61e-42	3.17e-40	CG1246	X	FBgn0032669	1342.57	9.68058	0.471271	20.5414	9.18007e-94	3.95271e-92	CG15155
FBgn0046294	1999.56	8.41159	0.516042	16.3002	9.83798e-60	4.2364e-58	CG12699	X	FBgn0050163	774.363	7.87564	0.58129	13.5486	8.08e-42	3.35e-40	Cpr60D	X	FBgn0033667	966.424	7.93885	0.387313	20.4973	2.27762e-93	9.76366e-92	reb
FBgn0000527	2685.43	4.60082	0.28227	16.2993	9.9751e-60	4.27661e-58	e	X	FBgn0033439	691.769	8.8655	0.654565	13.5441	8.58e-42	3.54e-40	CG1773	X	FBgn0032913	1485.34	9.15698	0.446808	20.4942	2.42421e-93	1.03465e-91	CG9259
FBgn0031737	1087.02	7.32899	0.450268	16.2769	1.43925e-59	6.14353e-58	obst-E	X	FBgn0000640	80326.3	9.28694	0.686098	13.5359	9.6e-42	3.95e-40	Fbp2	X	FBgn0051100	958.376	6.83902	0.333748	20.4916	2.55958e-93	1.08765e-91	CG31100
FBgn0037724	2113.57	8.95363	0.550919	16.2522	2.15608e-59	9.16332e-58	Fst	X	FBgn0028400	4164.52	-5.03154	0.372012	-13.5252	1.11e-41	4.54e-40	Syt4	X	FBgn0002564	333065	8.93824	0.436798	20.4631	4.59208e-93	1.94285e-91	Lsp1gamma
FBgn0051102	892.521	8.49656	0.523635	16.2261	3.2966e-59	1.39499e-57	CG31102	X	FBgn0052405	878.676	9.97574	0.738364	13.5106	1.35e-41	5.52e-40	Cpr65Av	X	FBgn0034497	1884.56	9.86642	0.482389	20.4532	5.62224e-93	2.3684e-91	CG9090
FBgn0039031	4948.85	10.0739	0.621439	16.2105	4.24817e-59	1.78991e-57	Gbp3	X	FBgn0003086	2736.17	9.83362	0.727862	13.5103	1.36e-41	5.52e-40	Pig1	X	FBgn0034999	2976.17	7.23911	0.354087	20.4444	6.73165e-93	2.82352e-91	CG3394
FBgn0051233	1244.51	10.3045	0.635841	16.206	4.57107e-59	1.91769e-57	CG31233	X	FBgn0027106	642.883	7.33501	0.54367	13.4917	1.75e-41	7.07e-40	Inx7	X	FBgn0031737	1325.7	6.5657	0.321173	20.4429	6.94832e-93	2.90189e-91	obst-E
FBgn0260795	4598.25	-3.97464	0.246646	-16.1147	2.00978e-58	8.39557e-57	NaPi-III	X	FBgn0030595	1433.59	6.50407	0.48246	13.481	2.02e-41	8.14e-40	CG14406	X	FBgn0052687	1362.99	4.94413	0.241895	20.4392	7.50014e-93	3.11897e-91	CG32687
FBgn0262146	638.003	8.51329	0.528313	16.1141	2.03122e-58	8.44899e-57	MtnE	X	FBgn0032076	3252.59	5.9101	0.438541	13.4768	2.14e-41	8.59e-40	CG9510	X	FBgn0035412	788.067	8.28163	0.405403	20.4281	9.40678e-93	3.89521e-91	CG14957
FBgn0038647	1081.06	7.49495	0.465272	16.1087	2.21472e-58	9.17327e-57	CG14302	X	FBgn0034140	9364.52	7.85592	0.583294	13.4682	2.41e-41	9.6e-40	Lst	X	FBgn0010357	9747.02	11.0904	0.543484	20.4062	1.47303e-92	6.07375e-91	betaTry
FBgn0034497	780.005	7.41533	0.460461	16.1041	2.38585e-58	9.84038e-57	CG9090	X	FBgn0015010	2022.58	8.0268	0.59815	13.4194	4.66e-41	1.85e-39	Ag5r	X	FBgn0267910	150128	-5.77585	0.283539	-20.3706	3.04938e-92	1.25205e-90	MRE16
FBgn0010357	8063.41	10.7369	0.668123	16.0703	4.1227e-58	1.69325e-56	betaTry	X	FBgn0003162	6393.34	5.25819	0.391944	13.4157	4.9e-41	1.94e-39	Pu	X	FBgn0033133	3043.8	5.92425	0.291026	20.3565	4.06872e-92	1.66356e-90	Tsp42Ek
FBgn0051075	16482.3	4.41664	0.275313	16.0422	6.48033e-58	2.63938e-56	CG31075	X	FBgn0031560	2616.13	9.95513	0.742138	13.4141	5e-41	1.97e-39	CG16713	X	FBgn0034296	6072.48	10.1189	0.497303	20.3475	4.88515e-92	1.98901e-90	CG10912
FBgn0053346	1743.58	11.1833	0.69714	16.0417	6.53183e-58	2.64932e-56	CG33346	X	FBgn0031034	722.684	6.21042	0.463027	13.4126	5.1e-41	2e-39	CG14205	X	FBgn0263234	1293.97	9.30508	0.45751	20.3386	5.86362e-92	2.37745e-90	Phae1
FBgn0032946	8891.16	-4.13078	0.257568	-16.0377	6.97225e-58	2.81627e-56	nrv3	X	FBgn0038846	950.823	9.9199	0.744444	13.3252	1.65e-40	6.42e-39	CG5697	X	FBgn0003863	9964.95	11.455	0.563715	20.3206	8.4531e-92	3.41316e-90	alphaTry
FBgn0052687	1064.18	4.63288	0.288928	16.0347	7.31121e-58	2.94103e-56	CG32687	X	FBgn0063493	851.984	6.34873	0.476488	13.324	1.68e-40	6.5e-39	GstE7	X	FBgn0052351	1061.01	8.87655	0.437648	20.2824	1.83844e-91	7.39249e-90	S-Lap2
FBgn0003889	1696.21	5.81255	0.36319	16.0042	1.19519e-57	4.78813e-56	betaTub85D	X	FBgn0028567	1074.81	9.38876	0.705896	13.3005	2.3e-40	8.87e-39	robl62A	X	FBgn0051102	960.089	7.8625	0.388263	20.2504	3.52128e-91	1.41011e-89	CG31102
FBgn0051538	648.291	8.78532	0.549129	15.9986	1.30592e-57	5.21036e-56	CG31538	X	FBgn0259236	1224.78	5.85538	0.441169	13.2724	3.35e-40	1.29e-38	comm3	X	FBgn0032684	2481.28	6.89384	0.341358	20.1953	1.07637e-90	4.29271e-89	CG10178
FBgn0038250	726.625	6.63692	0.415959	15.9557	2.60066e-57	1.03339e-55	CG3505	X	FBgn0014469	3975.27	7.10339	0.535732	13.2592	3.99e-40	1.53e-38	Cyp4e2	X	FBgn0031913	10874.6	8.46907	0.419943	20.1672	1.90235e-90	7.55581e-89	CG5958
FBgn0051004	835.813	7.14048	0.447823	15.9449	3.09337e-57	1.2242e-55	mesh	X	FBgn0039161	4702.67	8.88951	0.670722	13.2536	4.3e-40	1.64e-38	CG13606	X	FBgn0028939	1338.95	7.18011	0.356441	20.1439	3.04542e-90	1.20467e-88	NimC2
FBgn0031654	4171.64	9.96499	0.627207	15.8879	7.68978e-57	3.03095e-55	Jon25Bii	X	FBgn0000251	685.857	7.99669	0.603852	13.2428	4.97e-40	1.88e-38	cad	X	FBgn0027111	8234.18	-5.04201	0.250458	-20.1311	3.93783e-90	1.55138e-88	miple1
FBgn0038596	1725.3	-6.77079	0.426404	-15.8788	8.88521e-57	3.48807e-55	CG14312	X	FBgn0014368	2237.42	9.24492	0.698804	13.2296	5.92e-40	2.24e-38	nol	X	FBgn0051997	6931.73	4.6318	0.231121	20.0406	2.4379e-89	9.56579e-88	CG31997
FBgn0034025	5415.46	4.73008	0.298313	15.8561	1.27549e-56	4.98715e-55	GalNAc-T1	X	FBgn0003373	857896	16.1598	1.22494	13.1923	9.72e-40	3.66e-38	Sgs3	X	FBgn0035360	1213.32	7.12889	0.355894	20.0309	2.96113e-89	1.15722e-87	CG1246
FBgn0036264	2006.21	8.74468	0.554515	15.77	5.00763e-56	1.95018e-54	CG11529	X	FBgn0085320	1337.12	9.4302	0.715293	13.1837	1.09e-39	4.07e-38	CG34291	X	FBgn0036227	1968.59	11.0463	0.553204	19.9679	1.04691e-88	4.075e-87	CG17826
FBgn0033093	1036.79	5.56002	0.352773	15.7609	5.78087e-56	2.24238e-54	CG3270	X	FBgn0002440	773.709	9.64019	0.732006	13.1696	1.31e-39	4.89e-38	l(3)mbn	X	FBgn0270925	1922.66	9.43717	0.472877	19.9569	1.30495e-88	5.05917e-87	CG4836
FBgn0032945	829.717	7.74508	0.491772	15.7493	6.94224e-56	2.68223e-54	CG8665	X	FBgn0267366	1479.49	8.57491	0.652336	13.1449	1.82e-39	6.74e-38	mil	X	FBgn0052603	3439.61	9.97831	0.501847	19.8832	5.68925e-88	2.19691e-86	CG32603
FBgn0034128	5926.99	-4.59786	0.292069	-15.7424	7.74896e-56	2.98213e-54	CG4409	X	FBgn0035091	1054.96	5.43451	0.41414	13.1224	2.45e-39	9.05e-38	CG3829	X	FBgn0041710	2649.63	6.63602	0.334462	19.8409	1.32058e-87	5.07927e-86	yellow-f
FBgn0004425	1262.24	10.3077	0.655619	15.722	1.06827e-55	4.09502e-54	LysB	X	FBgn0035348	4546.53	5.30107	0.404266	13.1128	2.78e-39	1.02e-37	CG16758	X	FBgn0029762	1552.56	9.81392	0.494814	19.8335	1.52874e-87	5.85676e-86	NAAT1
FBgn0044050	2153.21	-4.08586	0.260035	-15.7128	1.23639e-55	4.72097e-54	Ilp3	X	FBgn0261561	1239.25	6.4132	0.489867	13.0917	3.67e-39	1.34e-37	CG42675	X	FBgn0031517	1965.54	11.198	0.565099	19.8159	2.16927e-87	8.27811e-86	CG15406
FBgn0024361	487.996	6.40793	0.407899	15.7096	1.29948e-55	4.94258e-54	Tsp2A	X	FBgn0052571	860.866	8.10653	0.619433	13.087	3.91e-39	1.43e-37	TwdlX	X	FBgn0034290	1660.89	8.40857	0.424497	19.8083	2.52283e-87	9.5897e-86	CG5773
FBgn0037592	4941.16	4.92547	0.313711	15.7006	1.49752e-55	5.67376e-54	CG11737	X	FBgn0040636	1433.46	5.4277	0.414915	13.0815	4.2e-39	1.53e-37	CG13255	X	FBgn0263006	29868.9	3.87129	0.195444	19.8076	2.55761e-87	9.68409e-86	SERCA
FBgn0052064	1945.01	10.1651	0.647939	15.6884	1.81644e-55	6.85547e-54	S-Lap4	X	FBgn0035312	847.646	7.93245	0.606716	13.0744	4.61e-39	1.67e-37	CG15820	X	FBgn0030347	685.018	5.52548	0.279005	19.8043	2.73501e-87	1.03156e-85	CG15739
FBgn0039475	1754.4	10.0402	0.640267	15.6812	2.03379e-55	7.64628e-54	CG6277	X	FBgn0032684	3937.63	8.01848	0.613328	13.0737	4.65e-39	1.68e-37	CG10178	X	FBgn0085753	1885.56	5.06904	0.256069	19.7956	3.2492e-87	1.22077e-85	28SrRNA-Psi:CR40596
FBgn0036481	452.693	5.98278	0.382125	15.6566	2.99533e-55	1.12181e-53	CG16959	X	FBgn0051538	633.733	6.2004	0.476116	13.0229	9.07e-39	3.26e-37	CG31538	X	FBgn0052633	1009.09	9.42054	0.476124	19.7859	3.93925e-87	1.47434e-85	CG32633
FBgn0033222	2524.79	8.12048	0.518913	15.649	3.37297e-55	1.25843e-53	CG12824	X	FBgn0035412	2343.64	9.86229	0.758588	13.0009	1.21e-38	4.33e-37	CG14957	X	FBgn0039031	6098.78	9.3641	0.47351	19.7759	4.79799e-87	1.78886e-85	Gbp3
FBgn0023178	972.344	-5.8152	0.371703	-15.6448	3.60616e-55	1.34031e-53	Pdf	X	FBgn0033286	1368.54	6.06492	0.466682	12.9958	1.29e-38	4.61e-37	CG2127	X	FBgn0002535	69863.8	8.65364	0.438073	19.7539	7.43017e-87	2.75966e-85	Lcp4
FBgn0001114	3066.79	5.78837	0.370065	15.6415	3.79765e-55	1.40614e-53	Glt	X	FBgn0030357	3731.26	6.17912	0.475623	12.9916	1.36e-38	4.85e-37	Sclp	X	FBgn0003378	17945.7	10.236	0.518729	19.7329	1.12469e-86	4.16136e-85	Sgs8
FBgn0037107	774.056	-5.0761	0.324711	-15.6327	4.36173e-55	1.6089e-53	CG7166	X	FBgn0032061	842.166	8.30831	0.640712	12.9673	1.88e-38	6.64e-37	CG9314	X	FBgn0039800	8579.18	8.77041	0.444604	19.7263	1.28131e-86	4.72288e-85	Npc2g
FBgn0036875	3357.22	6.51817	0.417466	15.6137	5.87711e-55	2.15973e-53	CG9449	X	FBgn0029795	527.409	6.3455	0.489676	12.9586	2.1e-38	7.41e-37	CG15773	X	FBgn0030326	15133.6	7.6886	0.389838	19.7226	1.38039e-86	5.06888e-85	CG2444
FBgn0053493	857.379	5.70095	0.365219	15.6097	6.25564e-55	2.29022e-53	CG33493	X	FBgn0037975	942.942	8.8637	0.684063	12.9574	2.13e-38	7.49e-37	CG3397	X	FBgn0028983	4482.52	4.01584	0.203847	19.7002	2.14676e-86	7.85342e-85	Spn55B
FBgn0033954	1065.45	10.2321	0.656514	15.5855	9.13709e-55	3.33265e-53	CG12860	X	FBgn0015572	788.842	8.97745	0.694861	12.9198	3.48e-38	1.22e-36	alpha-Est4	X	FBgn0031089	967.347	6.50522	0.330422	19.6876	2.75319e-86	1.00342e-84	CG9572
FBgn0032665	1227.07	10.715	0.690026	15.5284	2.22747e-54	8.09424e-53	CG15152	X	FBgn0037934	644.585	7.71749	0.598586	12.8929	4.94e-38	1.72e-36	CG6830	X	FBgn0002534	33486.9	9.01051	0.457997	19.6737	3.62051e-86	1.3146e-84	Lcp3
FBgn0035583	853.497	9.97618	0.643264	15.5087	3.03016e-54	1.09703e-52	CG13704	X	FBgn0036782	527.988	8.61465	0.668282	12.8907	5.08e-38	1.76e-36	CG7320	X	FBgn0032076	2066.86	5.77756	0.295309	19.5644	3.10921e-85	1.12475e-83	CG9510
FBgn0052249	27913.9	9.81244	0.635218	15.4474	7.85895e-54	2.83473e-52	CG32249	X	FBgn0038783	552.136	9.09412	0.705999	12.8812	5.74e-38	1.99e-36	CG4367	X	FBgn0262035	2645.26	7.90154	0.404218	19.5477	4.31492e-85	1.55513e-83	CG42846
FBgn0038312	1593.1	4.57821	0.296473	15.4422	8.51021e-54	3.05836e-52	Zip88E	X	FBgn0053192	609.413	8.45009	0.656149	12.8783	5.96e-38	2.06e-36	MtnD	X	FBgn0030763	1688.93	5.78356	0.296261	19.5218	7.15995e-85	2.57098e-83	CG9782
FBgn0259236	917.808	5.89122	0.381711	15.4337	9.71263e-54	3.47769e-52	comm3	X	FBgn0051100	858.716	6.47987	0.503408	12.872	6.47e-38	2.22e-36	CG31100	X	FBgn0033093	1953.2	6.49298	0.334508	19.4105	6.28515e-84	2.24856e-82	CG3270
FBgn0015572	490.508	7.79529	0.505478	15.4216	1.17127e-53	4.17853e-52	alpha-Est4	X	FBgn0032269	1181.37	7.38699	0.573938	12.8707	6.58e-38	2.25e-36	w-cup	X	FBgn0034710	1732.45	9.30236	0.479293	19.4085	6.53806e-84	2.33047e-82	CG3292
FBgn0035553	1623.26	9.58262	0.621388	15.4213	1.17672e-53	4.18269e-52	CG13722	X	FBgn0033133	4499.61	5.88362	0.457155	12.8701	6.63e-38	2.26e-36	Tsp42Ek	X	FBgn0037146	3084.33	8.27922	0.427468	19.3681	1.43588e-83	5.09948e-82	CG7470
FBgn0053307	466.321	7.1652	0.464969	15.4101	1.40035e-53	4.95959e-52	CG33307	X	FBgn0029831	993.5	6.4246	0.499762	12.8553	8.03e-38	2.73e-36	CG5966	X	FBgn0030357	1558.61	5.5838	0.288426	19.3596	1.69328e-83	5.99176e-82	Sclp
FBgn0051374	673.862	4.86555	0.316339	15.3808	2.20139e-53	7.76843e-52	sals	X	FBgn0010482	1664.75	7.00019	0.544671	12.8521	8.37e-38	2.83e-36	l(2)01289	X	FBgn0265180	5444.05	6.08621	0.315002	19.3211	3.56658e-83	1.25748e-81	CG44245
FBgn0037683	684.618	7.05331	0.458765	15.3746	2.42511e-53	8.52715e-52	CG18473	X	FBgn0037396	603.831	9.66452	0.75246	12.8439	9.31e-38	3.14e-36	CG11459	X	FBgn0032285	626.546	7.01661	0.364371	19.2568	1.23899e-82	4.35255e-81	CG17108
FBgn0038294	14215.1	6.22535	0.405076	15.3683	2.6692e-53	9.35178e-52	Mf	X	FBgn0039151	4733.22	7.02532	0.547274	12.8369	1.02e-37	3.42e-36	CG13607	X	FBgn0260226	28592.1	8.74412	0.454432	19.2419	1.65122e-82	5.77987e-81	CG42500
FBgn0039687	1010.29	-4.38297	0.285242	-15.3658	2.77505e-53	9.68789e-52	CG7593	X	FBgn0032945	518.258	7.80012	0.607995	12.8293	1.12e-37	3.77e-36	CG8665	X	FBgn0259101	1092.53	9.66655	0.503711	19.1907	4.42979e-82	1.54503e-80	CG42249
FBgn0036415	1088.37	8.54363	0.557288	15.3307	4.76781e-53	1.65855e-51	CG7768	X	FBgn0035550	1988.21	8.32609	0.650529	12.7989	1.66e-37	5.55e-36	CG11349	X	FBgn0024289	1032.23	8.88931	0.464472	19.1385	1.20648e-81	4.19294e-80	Sodh-1
FBgn0038292	685.939	6.09172	0.397829	15.3124	6.31853e-53	2.1902e-51	CG3987	X	FBgn0264347	1023.11	7.02047	0.550491	12.7531	3e-37	9.97e-36	CR43803	X	FBgn0050345	1317.11	7.92524	0.415683	19.0656	4.87598e-81	1.68855e-79	CG30345
FBgn0039800	5301.04	8.14819	0.533098	15.2846	9.68532e-53	3.34537e-51	Npc2g	X	FBgn0035612	8197.18	6.3316	0.496838	12.7438	3.38e-37	1.12e-35	frm	X	FBgn0036806	745.299	7.34065	0.385244	19.0545	6.02358e-81	2.07856e-79	Cyp12c1
FBgn0038181	1715.57	7.66922	0.50387	15.2206	2.58036e-52	8.88134e-51	CG9297	X	FBgn0002534	43975.9	8.82954	0.692873	12.7434	3.39e-37	1.12e-35	Lcp3	X	FBgn0034200	1145	7.2276	0.379584	19.0409	7.82473e-81	2.69055e-79	Gbp2
FBgn0035988	526.052	6.47834	0.426186	15.2007	3.49672e-52	1.19931e-50	CG3982	X	FBgn0046294	2682.09	7.90995	0.620964	12.7382	3.63e-37	1.19e-35	CG12699	X	FBgn0037601	780.138	5.13383	0.269686	19.0363	8.53464e-81	2.92432e-79	Cyp313b1
FBgn0053481	3970.39	-4.20724	0.277416	-15.1658	5.95869e-52	2.03658e-50	dpr7	X	FBgn0030326	23115.7	7.67972	0.602993	12.736	3.73e-37	1.22e-35	CG2444	X	FBgn0040340	13240.2	3.69799	0.194773	18.9861	2.22067e-80	7.58224e-79	TRAM
FBgn0016675	846.509	7.02388	0.46352	15.1533	7.20013e-52	2.45231e-50	Lectin-galC1	X	FBgn0035806	737.348	7.4974	0.588941	12.7303	4.01e-37	1.31e-35	PGRP-SD	X	FBgn0028491	1546.86	7.1022	0.374831	18.9477	4.60933e-80	1.5683e-78	CG2930
FBgn0053099	500.45	6.2227	0.411358	15.1272	1.07135e-51	3.63628e-50	CG33099	X	FBgn0010019	1481.27	7.34886	0.578012	12.714	4.94e-37	1.61e-35	Cyp4g1	X	FBgn0001112	1460.32	6.2146	0.328141	18.9388	5.46239e-80	1.85207e-78	Gld
FBgn0266095	4512.13	-7.24717	0.479163	-15.1246	1.11402e-51	3.76802e-50	CR44832	X	FBgn0003889	1919.53	6.00765	0.473018	12.7007	5.86e-37	1.9e-35	betaTub85D	X	FBgn0003086	2233.31	10.7145	0.568895	18.8339	3.97961e-79	1.34464e-77	Pig1
FBgn0039154	447.873	6.70685	0.443762	15.1136	1.31681e-51	4.43857e-50	Npc2f	X	FBgn0062961	718.417	7.36533	0.58099	12.6772	7.91e-37	2.56e-35	pncr016:2R	X	FBgn0036415	1000.14	8.92932	0.474829	18.8053	6.82903e-79	2.29942e-77	CG7768
FBgn0034840	2121.56	9.96853	0.662957	15.0365	4.23551e-51	1.42275e-49	CG3124	X	FBgn0036890	2162.79	-4.72844	0.373096	-12.6735	8.29e-37	2.67e-35	CG9368	X	FBgn0032727	1996.65	4.32864	0.230255	18.7993	7.65188e-79	2.5676e-77	CG10623
FBgn0031558	2351.11	6.78894	0.451659	15.0311	4.59193e-51	1.5372e-49	CG16704	X	FBgn0030742	2807.18	-4.47053	0.352794	-12.6718	8.48e-37	2.72e-35	CG9919	X	FBgn0250904	989.465	8.93736	0.475595	18.792	8.78492e-79	2.93767e-77	CG34434
FBgn0262577	6080.31	8.42756	0.561625	15.0057	6.74059e-51	2.24878e-49	CG43117	X	FBgn0027560	767.107	7.48785	0.591262	12.6642	9.34e-37	2.99e-35	Tps1	X	FBgn0003373	781445	11.9391	0.635962	18.7733	1.24801e-78	4.15904e-77	Sgs3
FBgn0051789	3627.61	10.1679	0.6777	15.0035	6.96455e-51	2.31559e-49	CG31789	X	FBgn0053127	365.991	7.37954	0.583429	12.6486	1.14e-36	3.64e-35	CG33127	X	FBgn0052652	672.369	8.42035	0.44906	18.7511	1.89728e-78	6.30117e-77	CR32652
FBgn0050172	5082.38	-5.42795	0.362319	-14.9811	9.75206e-51	3.2314e-49	CG30172	X	FBgn0038353	3895.77	7.84151	0.620987	12.6275	1.49e-36	4.74e-35	CG5399	X	FBgn0265185	1013.97	8.5851	0.45805	18.7427	2.2196e-78	7.34658e-77	CG44250
FBgn0041710	3126.97	7.57835	0.506014	14.9766	1.04468e-50	3.4499e-49	yellow-f	X	FBgn0036948	1242.07	10.4413	0.829511	12.5873	2.48e-36	7.86e-35	CG7298	X	FBgn0028412	466.916	5.78259	0.309207	18.7014	4.8264e-78	1.59206e-76	Mst33A
FBgn0004577	1849.58	8.90496	0.594807	14.9712	1.13316e-50	3.72951e-49	Pxd	X	FBgn0032615	416.607	8.52956	0.677902	12.5823	2.64e-36	8.35e-35	CG6012	X	FBgn0039620	1616.03	5.51743	0.295341	18.6815	6.99621e-78	2.3e-76	wat
FBgn0037782	982.602	9.86777	0.659421	14.9643	1.2565e-50	4.12157e-49	Npc2d	X	FBgn0030277	469.66	7.51308	0.598077	12.5621	3.41e-36	1.07e-34	CG1394	X	FBgn0053340	1285.36	10.113	0.542218	18.6511	1.23597e-77	4.04956e-76	CG33340
FBgn0039897	3632.88	5.39105	0.360303	14.9625	1.28989e-50	4.21696e-49	CG1674	X	FBgn0035427	3585.02	7.37728	0.587654	12.5538	3.79e-36	1.19e-34	ckd	X	FBgn0015568	852.629	8.30174	0.445582	18.6312	1.79441e-77	5.85952e-76	alpha-Est1
FBgn0038366	992.212	6.9778	0.466619	14.954	1.46743e-50	4.78138e-49	CG4576	X	FBgn0037447	4065.11	7.47932	0.597068	12.5268	5.33e-36	1.67e-34	Neurochondrin	X	FBgn0034840	1785	9.25675	0.497747	18.5973	3.37842e-77	1.09951e-75	CG3124
FBgn0031432	829.715	9.19991	0.615812	14.9395	1.82408e-50	5.92372e-49	Cyp309a1	X	FBgn0040364	669.957	8.54267	0.682579	12.5153	6.16e-36	1.92e-34	CG11378	X	FBgn0003507	1021.41	6.27545	0.337838	18.5753	5.09074e-77	1.65127e-75	srp
FBgn0038718	921.718	10.3261	0.691216	14.939	1.83657e-50	5.94452e-49	CG17752	X	FBgn0262002	364.113	7.92652	0.633432	12.5136	6.29e-36	1.95e-34	CG42820	X	FBgn0035312	929.522	7.63508	0.411828	18.5395	9.91598e-77	3.20573e-75	CG15820
FBgn0032235	714.45	4.81834	0.322611	14.9354	1.93812e-50	6.25251e-49	CG5096	X	FBgn0037750	734.323	9.75037	0.780566	12.4914	8.32e-36	2.58e-34	Whamy	X	FBgn0005670	4491.56	8.56167	0.462414	18.5152	1.55767e-76	5.0191e-75	Cyp4d1
FBgn0013683	3775.04	-5.46636	0.366792	-14.9032	3.14323e-50	1.01069e-48	ND4L	X	FBgn0019828	812.64	8.86709	0.710043	12.4881	8.67e-36	2.68e-34	dj	X	FBgn0267366	840.532	9.03285	0.48808	18.5069	1.81662e-76	5.83418e-75	mil
FBgn0022893	43273.1	-3.6192	0.243986	-14.8337	8.87491e-50	2.84434e-48	Df31	X	FBgn0051709	585.44	7.86681	0.630881	12.4696	1.09e-35	3.37e-34	CG31709	X	FBgn0052302	1476.89	8.98836	0.488205	18.411	1.0715e-75	3.42985e-74	CG32302
FBgn0259678	589.005	6.5794	0.443813	14.8247	1.0141e-49	3.2395e-48	sqa	X	FBgn0032913	1312.4	11.7926	0.947684	12.4436	1.51e-35	4.64e-34	CG9259	X	FBgn0013307	694.696	8.18211	0.444512	18.4069	1.15564e-75	3.68706e-74	Odc1
FBgn0030098	7153.52	9.50737	0.642875	14.7888	1.72935e-49	5.50633e-48	CG12057	X	FBgn0061356	1912.11	6.85379	0.55115	12.4354	1.68e-35	5.13e-34	CG18003	X	FBgn0037750	739.298	8.4294	0.458901	18.3687	2.34055e-75	7.44312e-74	Whamy
FBgn0033367	14484.8	6.96131	0.471465	14.7653	2.45299e-49	7.78507e-48	PPO2	X	FBgn0036833	3346.31	9.59674	0.772466	12.4235	1.95e-35	5.93e-34	CG3819	X	FBgn0040609	2087.25	5.73209	0.31217	18.3621	2.64286e-75	8.37709e-74	CG3348
FBgn0030595	805.209	6.64226	0.450133	14.7562	2.80532e-49	8.87442e-48	CG14406	X	FBgn0003388	1218.21	6.90099	0.556542	12.3998	2.62e-35	7.96e-34	shd	X	FBgn0020642	883.917	8.89419	0.484809	18.3458	3.56807e-75	1.1273e-73	Lcp65Ac
FBgn0039714	2137.42	4.06185	0.275445	14.7465	3.23994e-49	1.02163e-47	Zip99C	X	FBgn0010383	485.275	6.41547	0.517453	12.3982	2.67e-35	8.09e-34	Cyp18a1	X	FBgn0025454	2631.61	7.64302	0.41689	18.3334	4.47755e-75	1.41007e-73	Cyp6g1
FBgn0001218	50033.9	3.55997	0.241488	14.7418	3.47311e-49	1.09163e-47	Hsc70-3	X	FBgn0262146	1084	9.53864	0.769911	12.3893	2.99e-35	9.01e-34	MtnE	X	FBgn0029507	6714.87	8.00294	0.437043	18.3116	6.69314e-75	2.101e-73	Tsp42Ed
FBgn0033978	1026.1	7.8997	0.537418	14.6994	6.50773e-49	2.03888e-47	Cyp6a23	X	FBgn0037181	5873.76	5.63199	0.454629	12.3881	3.03e-35	9.12e-34	CG11370	X	FBgn0004425	1562.76	9.3623	0.511548	18.3019	7.99485e-75	2.50154e-73	LysB
FBgn0038979	451.862	6.57843	0.449642	14.6304	1.79837e-48	5.61633e-47	tHMG2	X	FBgn0259795	1951.08	8.30076	0.671425	12.3629	4.15e-35	1.24e-33	loopin-1	X	FBgn0029831	1637.61	7.47282	0.408376	18.2989	8.45069e-75	2.63569e-73	CG5966
FBgn0032283	2598.78	7.29376	0.500486	14.5734	4.14974e-48	1.29184e-46	CG7296	X	FBgn0051802	599.063	8.24025	0.666999	12.3542	4.62e-35	1.38e-33	CG31802	X	FBgn0032651	1511.03	-4.60782	0.251939	-18.2894	1.0044e-74	3.12264e-73	Oli
FBgn0032076	1989.72	5.93647	0.407712	14.5605	5.01205e-48	1.55533e-46	CG9510	X	FBgn0036806	748.836	7.65845	0.620024	12.3519	4.76e-35	1.42e-33	Cyp12c1	X	FBgn0000251	805.284	8.36464	0.457741	18.2737	1.33986e-74	4.1523e-73	cad
FBgn0036202	2540.98	-4.08755	0.281252	-14.5334	7.44556e-48	2.30318e-46	CG6024	X	FBgn0034335	15101.6	4.86672	0.39451	12.3361	5.79e-35	1.72e-33	GstE1	X	FBgn0052405	1016.74	9.27233	0.509895	18.1848	6.81359e-74	2.10486e-72	Cpr65Av
FBgn0038373	566.844	8.40199	0.579408	14.501	1.19412e-47	3.68219e-46	CG4546	X	FBgn0036264	3117.32	7.94216	0.645581	12.3023	8.8e-35	2.6e-33	CG11529	X	FBgn0030929	836.352	6.50416	0.35959	18.0877	3.98359e-73	1.22672e-71	CG15043
FBgn0037697	10120.3	-4.58856	0.316836	-14.4825	1.56399e-47	4.80755e-46	GstZ2	X	FBgn0032588	615.835	7.62951	0.620462	12.2965	9.46e-35	2.79e-33	CG5968	X	FBgn0032287	910.121	9.0396	0.49992	18.0821	4.40842e-73	1.35326e-71	CG6415
FBgn0039685	174993	7.70766	0.532838	14.4653	2.00719e-47	6.15057e-46	Obp99b	X	FBgn0051103	1296.09	7.14381	0.581107	12.2935	9.82e-35	2.89e-33	CG31103	X	FBgn0039054	1218.17	-4.44326	0.246045	-18.0587	6.73305e-73	2.06036e-71	Cow
FBgn0032726	826.944	6.13096	0.424409	14.4459	2.66207e-47	8.13178e-46	CG10621	X	FBgn0040813	14350.9	7.80384	0.635563	12.2786	1.18e-34	3.46e-33	Nplp2	X	FBgn0035496	993.66	6.64238	0.368282	18.0361	1.01434e-72	3.09422e-71	CG14990
FBgn0037974	1192.47	9.14702	0.634937	14.4062	4.73052e-47	1.44052e-45	CG12224	X	FBgn0063497	5103.82	6.58046	0.536955	12.2552	1.58e-34	4.61e-33	GstE3	X	FBgn0038717	1287.86	10.6115	0.589555	17.9992	1.97633e-72	6.00989e-71	CG17751
FBgn0030775	628.217	8.77911	0.609606	14.4013	5.07938e-47	1.54195e-45	CG9673	X	FBgn0031163	567.787	7.4819	0.611072	12.2439	1.81e-34	5.28e-33	CG14579	X	FBgn0054003	700.872	7.56481	0.420605	17.9855	2.52933e-72	7.66756e-71	NimB3
FBgn0040682	4515.91	8.50815	0.59128	14.3894	6.03406e-47	1.8261e-45	CG14664	X	FBgn0037915	511.149	8.6323	0.706198	12.2236	2.33e-34	6.76e-33	CG6790	X	FBgn0267726	855.88	8.40597	0.46793	17.9642	3.7184e-72	1.12372e-70	CG46059
FBgn0010225	4776.94	3.71184	0.258316	14.3694	8.05502e-47	2.43018e-45	Gel	X	FBgn0085235	646.312	8.95035	0.732943	12.2115	2.7e-34	7.81e-33	CG34206	X	FBgn0042189	1000.77	8.76335	0.487916	17.9608	3.95245e-72	1.19075e-70	CG17376
FBgn0025620	883.6	7.83504	0.545758	14.3562	9.73594e-47	2.92827e-45	CG13360	X	FBgn0265180	4268.57	5.86061	0.479957	12.2107	2.73e-34	7.87e-33	CG44245	X	FBgn0039161	2866.62	8.70981	0.485154	17.9527	4.57233e-72	1.37325e-70	CG13606
FBgn0030398	500.573	6.53028	0.455829	14.3262	1.50191e-46	4.50342e-45	Cpr11B	X	FBgn0039840	373.762	7.12217	0.583875	12.1981	3.18e-34	9.16e-33	CG11340	X	FBgn0038647	927.138	7.52403	0.419143	17.951	4.7171e-72	1.41237e-70	CG14302
FBgn0260954	1486.16	7.61662	0.531935	14.3187	1.67228e-46	4.99893e-45	CG42586	X	FBgn0033760	395.261	6.94952	0.569921	12.1938	3.35e-34	9.62e-33	CG8785	X	FBgn0038596	957.461	-5.51117	0.307088	-17.9465	5.10707e-72	1.52444e-70	CG14312
FBgn0038163	351.155	6.05997	0.423243	14.3179	1.69047e-46	5.03792e-45	CG10841	X	FBgn0031558	6053.11	8.47408	0.694994	12.193	3.39e-34	9.69e-33	CG16704	X	FBgn0034075	697.752	4.34012	0.241928	17.9398	5.77044e-72	1.71719e-70	Asph
FBgn0033936	908.739	6.45169	0.450729	14.3139	1.79199e-46	5.32423e-45	CG17386	X	FBgn0054003	1482.67	7.99287	0.658476	12.1384	6.61e-34	1.89e-32	NimB3	X	FBgn0051183	449.339	5.55738	0.310492	17.8986	1.20922e-71	3.58748e-70	CG31183
FBgn0003388	843.201	7.27803	0.508687	14.3075	1.96494e-46	5.82038e-45	shd	X	FBgn0023495	447.4	7.03822	0.580063	12.1335	7.02e-34	2e-32	Lip3	X	FBgn0261561	1296.95	6.92464	0.388378	17.8296	4.16188e-71	1.23098e-69	CG42675
FBgn0041180	1516.73	4.03665	0.282231	14.3026	2.10639e-46	6.22052e-45	Tep4	X	FBgn0039154	867.298	6.1303	0.505577	12.1254	7.75e-34	2.2e-32	Npc2f	X	FBgn0029795	785.706	6.89108	0.386841	17.8137	5.53036e-71	1.62606e-69	CG15773
FBgn0034712	2421.76	5.11134	0.35793	14.2803	2.90367e-46	8.5492e-45	CG3264	X	FBgn0036014	566.397	9.85169	0.812568	12.1241	7.87e-34	2.22e-32	CG3222	X	FBgn0030097	1777.3	10.2983	0.578113	17.8137	5.53105e-71	1.62606e-69	CG12115
FBgn0035552	2625.85	11.1678	0.782105	14.2791	2.95363e-46	8.67018e-45	CG11350	X	FBgn0030876	2494.28	5.20553	0.430018	12.1054	9.89e-34	2.79e-32	CG6762	X	FBgn0023507	1638.15	4.53313	0.254627	17.803	6.6943e-71	1.96212e-69	D2hgdh
FBgn0028491	1031.96	7.4254	0.520721	14.2598	3.89317e-46	1.13939e-44	CG2930	X	FBgn0036415	2734.71	7.7933	0.643834	12.1045	1e-33	2.81e-32	CG7768	X	FBgn0035398	761.5	4.84486	0.272366	17.7881	8.7407e-71	2.55423e-69	Cht7
FBgn0037750	625.398	9.581	0.671908	14.2594	3.91861e-46	1.14341e-44	Whamy	X	FBgn0052284	854.765	8.93501	0.738695	12.0957	1.11e-33	3.12e-32	CG32284	X	FBgn0053519	813.602	7.5112	0.422296	17.7866	8.97745e-71	2.61556e-69	Unc-89
FBgn0035829	3222.04	-3.71102	0.260383	-14.2522	4.34679e-46	1.26458e-44	HP4	X	FBgn0035813	2078.22	6.57615	0.544053	12.0873	1.23e-33	3.44e-32	CG8492	X	FBgn0033953	898.602	9.73368	0.547354	17.7831	9.5474e-71	2.7733e-69	CG12861
FBgn0019952	5169.76	3.6859	0.258644	14.2509	4.42774e-46	1.28431e-44	Orct	X	FBgn0030051	3024.93	5.62783	0.465995	12.077	1.4e-33	3.89e-32	spirit	X	FBgn0015001	435.111	7.46103	0.420304	17.7515	1.67814e-70	4.8601e-69	iotaTry
FBgn0052603	1819.99	10.2017	0.716402	14.2402	5.15601e-46	1.49112e-44	CG32603	X	FBgn0032639	1078.65	6.9099	0.572572	12.0682	1.56e-33	4.32e-32	CG18563	X	FBgn0033292	704.226	9.42064	0.531194	17.7348	2.25784e-70	6.51959e-69	Cyp4ad1
FBgn0014469	3192.99	7.12187	0.500328	14.2344	5.6046e-46	1.61607e-44	Cyp4e2	X	FBgn0033367	20304.7	7.60148	0.63006	12.0647	1.62e-33	4.49e-32	PPO2	X	FBgn0004173	859.601	9.82333	0.554235	17.7241	2.73169e-70	7.86451e-69	Mst84Db
FBgn0030697	528.255	6.84996	0.481371	14.2301	5.9584e-46	1.71304e-44	CG8565	X	FBgn0035143	513.929	7.97386	0.664346	12.0026	3.44e-33	9.51e-32	Ppm1	X	FBgn0265045	1244.28	3.85289	0.217436	17.7196	2.95853e-70	8.49246e-69	Strn-Mlck
FBgn0033872	3877.98	-5.314	0.373481	-14.2283	6.1145e-46	1.75276e-44	CG6329	X	FBgn0034659	382.399	7.75053	0.646278	11.9926	3.89e-33	1.07e-31	CG4021	X	FBgn0030775	1123.77	9.96751	0.56269	17.714	3.26847e-70	9.35455e-69	CG9673
FBgn0039030	632.659	9.09323	0.639913	14.2101	7.93017e-46	2.26659e-44	CG6660	X	FBgn0030993	2021.29	5.74312	0.480434	11.954	6.19e-33	1.7e-31	Mec2	X	FBgn0051217	479.139	5.0599	0.285713	17.7098	3.52615e-70	1.00625e-68	modSP
FBgn0035550	1108.03	6.21746	0.4379	14.1984	9.37836e-46	2.6727e-44	CG11349	X	FBgn0053099	551.843	5.47997	0.458751	11.9454	6.86e-33	1.88e-31	CG33099	X	FBgn0025578	1516.52	8.35893	0.472222	17.7013	4.09953e-70	1.16645e-68	Lcp9
FBgn0030688	642.105	9.03906	0.636741	14.1958	9.72441e-46	2.76326e-44	CG8952	X	FBgn0032726	1207.61	7.26362	0.608773	11.9316	8.1e-33	2.21e-31	CG10621	X	FBgn0051198	1021.74	9.29183	0.525127	17.6945	4.62674e-70	1.31262e-68	CG31198
FBgn0034010	631.09	6.3739	0.44915	14.191	1.04129e-45	2.95033e-44	CG8157	X	FBgn0051988	679.308	7.37039	0.617922	11.9277	8.49e-33	2.31e-31	CG31988	X	FBgn0051321	539.106	6.13813	0.347382	17.6697	7.18114e-70	2.03139e-68	CG31321
FBgn0030073	1671.1	8.12659	0.573245	14.1765	1.28139e-45	3.62012e-44	CG10962	X	FBgn0034301	509.487	7.50313	0.629952	11.9106	1.04e-32	2.83e-31	CG5756	X	FBgn0030362	27192.2	4.37727	0.248264	17.6315	1.41131e-69	3.9807e-68	regucalcin
FBgn0000557	17470.9	-4.21951	0.297893	-14.1645	1.51916e-45	4.27947e-44	Ef1alpha100E	X	FBgn0032218	838.419	5.35086	0.449335	11.9084	1.07e-32	2.89e-31	CG5381	X	FBgn0034318	978.768	10.2143	0.579598	17.623	1.63959e-69	4.61121e-68	CG14500
FBgn0033788	660.08	7.97902	0.563732	14.1539	1.76615e-45	4.96095e-44	CG13323	X	FBgn0026190	427.921	7.35375	0.617932	11.9006	1.18e-32	3.17e-31	PH4alphaMP	X	FBgn0039755	573.446	7.81492	0.443485	17.6216	1.68122e-69	4.71468e-68	CG15531
FBgn0027570	2236.52	5.66395	0.400303	14.1491	1.8905e-45	5.29502e-44	Nep2	X	FBgn0029752	768.086	6.30678	0.530602	11.8861	1.4e-32	3.76e-31	TrxT	X	FBgn0259678	641.355	6.9235	0.393383	17.5999	2.46824e-69	6.90186e-68	sqa
FBgn0004108	4965.7	-3.78959	0.26793	-14.144	2.03518e-45	5.68396e-44	Nrt	X	FBgn0052835	355.53	8.4782	0.713682	11.8795	1.51e-32	4.06e-31	CR32835	X	FBgn0002939	1130.76	10.4151	0.59234	17.583	3.3274e-69	9.27764e-68	ninaD
FBgn0025684	3805.38	3.36646	0.23804	14.1424	2.08112e-45	5.79572e-44	MFS18	X	FBgn0261990	740.82	7.60736	0.64153	11.8582	1.95e-32	5.22e-31	CG42808	X	FBgn0031545	521.899	8.46578	0.481702	17.5747	3.84646e-69	1.06943e-67	CG3213
FBgn0039755	557.815	8.91958	0.632233	14.1081	3.38726e-45	9.40638e-44	CG15531	X	FBgn0261287	798.088	5.23526	0.441558	11.8563	2e-32	5.32e-31	ymp	X	FBgn0262023	1535.4	11.0216	0.628593	17.5338	7.91573e-69	2.19453e-67	CG42834
FBgn0013684	47372.6	-5.46813	0.387703	-14.1039	3.59352e-45	9.95089e-44	ND5	X	FBgn0085317	1087.33	7.09169	0.598292	11.8532	2.07e-32	5.51e-31	CG34288	X	FBgn0036766	812.889	9.61075	0.54826	17.5295	8.52582e-69	2.35695e-67	CG5506
FBgn0043806	4120.67	-3.45089	0.244834	-14.0948	4.0878e-45	1.12876e-43	CG32032	X	FBgn0050431	450.791	7.74923	0.654782	11.8348	2.58e-32	6.84e-31	CG30431	X	FBgn0000615	1363.72	5.51561	0.314952	17.5125	1.14982e-68	3.16966e-67	exu
FBgn0033542	384.914	8.18631	0.582182	14.0614	6.55517e-45	1.80498e-43	CG12309	X	FBgn0085453	2543.74	4.71687	0.398779	11.8283	2.79e-32	7.37e-31	CG34424	X	FBgn0040398	11547	6.45221	0.368957	17.4877	1.77769e-68	4.88664e-67	CG14629
FBgn0003358	1808.21	9.06233	0.645631	14.0364	9.33528e-45	2.56327e-43	Jon99Ci	X	FBgn0028560	542.104	8.04356	0.681295	11.8063	3.62e-32	9.55e-31	sut4	X	FBgn0025643	1969.52	8.02376	0.459221	17.4725	2.32024e-68	6.36007e-67	CG3588
FBgn0030594	1067.33	5.5594	0.396521	14.0205	1.16864e-44	3.19985e-43	CG9509	X	FBgn0036323	414.017	7.04047	0.596719	11.7986	3.97e-32	1.04e-30	CG14118	X	FBgn0016675	902.825	8.2123	0.470319	17.4611	2.83385e-68	7.74613e-67	Lectin-galC1
FBgn0033593	1582.72	6.14286	0.438814	13.9988	1.58565e-44	4.32953e-43	Listericin	X	FBgn0028412	763.058	5.94218	0.503669	11.7978	4.01e-32	1.05e-30	Mst33A	X	FBgn0037447	2810.42	6.36195	0.364571	17.4505	3.4117e-68	9.29952e-67	Neurochondrin
FBgn0051198	740.649	10.2846	0.737282	13.9493	3.17582e-44	8.64725e-43	CG31198	X	FBgn0035496	1170.37	6.40949	0.543312	11.7971	4.04e-32	1.06e-30	CG14990	X	FBgn0032281	517.663	7.80291	0.447244	17.4466	3.65167e-68	9.9258e-67	CG17107
FBgn0036890	1749.54	-4.53677	0.325363	-13.9437	3.43538e-44	9.32801e-43	CG9368	X	FBgn0039787	341.991	7.41737	0.629407	11.7847	4.68e-32	1.22e-30	CG9702	X	FBgn0038200	2294.95	9.55412	0.548314	17.4245	5.37439e-68	1.45677e-66	CG9920
FBgn0015550	746.322	-7.95713	0.571109	-13.9328	4.00592e-44	1.08471e-42	tap	X	FBgn0035553	3134.45	8.42264	0.715758	11.7674	5.74e-32	1.49e-30	CG13722	X	FBgn0263239	532.586	5.52948	0.318157	17.3797	1.1753e-67	3.17691e-66	dar1
FBgn0030777	528.581	9.06156	0.651901	13.9002	6.31599e-44	1.70549e-42	CG9672	X	FBgn0036622	617.698	6.91056	0.587819	11.7563	6.56e-32	1.7e-30	CG4753	X	FBgn0034276	423.056	7.23762	0.416927	17.3595	1.67273e-67	4.50895e-66	Sardh
FBgn0035521	3338.69	-5.38752	0.387858	-13.8904	7.23794e-44	1.94906e-42	VhaM9.7-a	X	FBgn0260006	605.722	6.66568	0.567063	11.7547	6.68e-32	1.73e-30	drd	X	FBgn0023441	1419.47	3.78452	0.218106	17.3518	1.91237e-67	5.14068e-66	fus
FBgn0051313	1241.16	6.36719	0.460136	13.8376	1.51133e-43	4.05859e-42	CG31313	X	FBgn0085282	676.491	7.21581	0.615078	11.7315	8.79e-32	2.27e-30	CG34253	X	FBgn0051538	730.317	8.55384	0.493195	17.3437	2.19988e-67	5.89726e-66	CG31538
FBgn0051988	484.366	7.18753	0.521266	13.7886	2.98514e-43	7.99446e-42	CG31988	X	FBgn0038373	498.944	8.68961	0.742362	11.7053	1.2e-31	3.08e-30	CG4546	X	FBgn0033137	2896.93	6.30933	0.363853	17.3403	2.33315e-67	6.23733e-66	Tsp42Ep
FBgn0036953	1751.02	11.4403	0.830037	13.7828	3.23283e-43	8.63414e-42	CG17145	X	FBgn0051907	344.536	8.1384	0.695366	11.7038	1.22e-31	3.13e-30	CG31907	X	FBgn0032283	3701.15	7.2651	0.419425	17.3216	3.23433e-67	8.62281e-66	CG7296
FBgn0035495	10783.3	-3.45301	0.250561	-13.7811	3.31105e-43	8.81895e-42	CG14989	X	FBgn0032235	934.143	4.85876	0.415308	11.6992	1.29e-31	3.29e-30	CG5096	X	FBgn0035553	1655.92	9.26775	0.536693	17.2682	8.15823e-67	2.16906e-65	CG13722
FBgn0050009	4675.96	-5.12507	0.372009	-13.7767	3.51842e-43	9.3458e-42	CR30009	X	FBgn0052687	1455.01	4.93185	0.421628	11.6972	1.32e-31	3.36e-30	CG32687	X	FBgn0030544	1014.25	8.02389	0.466704	17.1927	3.01336e-66	7.98992e-65	CG13403
FBgn0002562	163446	8.61439	0.626599	13.7479	5.24571e-43	1.38962e-41	Lsp1alpha	X	FBgn0033302	386.414	6.89087	0.590693	11.6657	1.91e-31	4.85e-30	Cyp6a14	X	FBgn0028543	1728.51	4.7401	0.275709	17.1924	3.02657e-66	8.00313e-65	NimB2
FBgn0033221	2335.24	7.09852	0.516794	13.7357	6.20683e-43	1.63978e-41	CG12825	X	FBgn0037697	10927	-4.29038	0.368503	-11.6427	2.5e-31	6.34e-30	GstZ2	X	FBgn0051030	2575.22	-4.65496	0.270784	-17.1906	3.1204e-66	8.2289e-65	CG31030
FBgn0028513	966.286	8.21829	0.598494	13.7316	6.56364e-43	1.72937e-41	CG9254	X	FBgn0041194	713.299	7.90971	0.679413	11.642	2.52e-31	6.38e-30	Prat2	X	FBgn0032639	821.547	6.9633	0.405382	17.1771	3.93999e-66	1.03343e-64	CG18563
FBgn0030876	1781.09	4.53223	0.330308	13.7213	7.57478e-43	1.99041e-41	CG6762	X	FBgn0262577	6539.65	8.17817	0.703535	11.6244	3.1e-31	7.82e-30	CG43117	X	FBgn0085222	3039.55	7.68533	0.447413	17.1773	3.9294e-66	1.03343e-64	CG34193
FBgn0036659	723.873	10.1814	0.742196	13.7179	7.9355e-43	2.07961e-41	CG9701	X	FBgn0265726	3210.72	4.58989	0.395007	11.6198	3.27e-31	8.23e-30	Nna1	X	FBgn0063497	1694.08	5.38466	0.313788	17.1602	5.27576e-66	1.38006e-64	GstE3
FBgn0023549	370.304	5.16436	0.376844	13.7043	9.57415e-43	2.50233e-41	Mct1	X	FBgn0025456	18217.4	4.94923	0.426451	11.6056	3.86e-31	9.69e-30	CREG	X	FBgn0003046	3770.63	5.45635	0.318199	17.1476	6.55069e-66	1.70897e-64	Pcp
FBgn0033484	4725.33	-4.19482	0.306152	-13.7018	9.90846e-43	2.5828e-41	CG2269	X	FBgn0051313	2320.76	8.17374	0.704317	11.6052	3.88e-31	9.71e-30	CG31313	X	FBgn0030688	944.885	8.40996	0.491445	17.1127	1.19327e-65	3.10473e-64	CG8952
FBgn0011722	1542.62	5.57008	0.406989	13.6861	1.22951e-42	3.19641e-41	Tig	X	FBgn0034658	320.949	8.14179	0.701643	11.6039	3.94e-31	9.83e-30	Grx-1	X	FBgn0032074	788.652	9.70586	0.567398	17.1059	1.34058e-65	3.47872e-64	Tsp29Fa
FBgn0028999	5553.63	-3.56552	0.26062	-13.6809	1.32004e-42	3.42264e-41	nerfin-1	X	FBgn0265263	719.235	7.78136	0.672006	11.5793	5.25e-31	1.31e-29	CG42688	X	FBgn0032400	27240.1	3.00992	0.176821	17.0224	5.60307e-65	1.45009e-63	CG6770
FBgn0261990	371.677	8.26027	0.604229	13.6708	1.51786e-42	3.92516e-41	CG42808	X	FBgn0085334	8033.49	8.87342	0.766909	11.5704	5.82e-31	1.45e-29	CG34305	X	FBgn0265276	8901.13	-3.08414	0.181483	-16.9941	9.07929e-65	2.34352e-63	l(3)neo38
FBgn0035348	3223.18	5.37321	0.393069	13.6699	1.53612e-42	3.9619e-41	CG16758	X	FBgn0037683	855.465	6.06818	0.52484	11.562	6.42e-31	1.59e-29	CG18473	X	FBgn0015572	1001.33	10.4384	0.614497	16.9869	1.02652e-64	2.64262e-63	alpha-Est4
FBgn0038540	4432.83	-5.21611	0.382571	-13.6344	2.50165e-42	6.43518e-41	CG14321	X	FBgn0036419	1543.16	8.46844	0.733431	11.5463	7.7e-31	1.9e-29	CG13482	X	FBgn0036659	934.191	8.83837	0.521693	16.9417	2.21641e-64	5.69075e-63	CG9701
FBgn0035806	597.514	7.04837	0.518056	13.6054	3.71753e-42	9.53776e-41	PGRP-SD	X	FBgn0040503	406.266	7.25054	0.628325	11.5395	8.34e-31	2.06e-29	CG7763	X	FBgn0052311	2690.2	4.09644	0.241883	16.9356	2.45749e-64	6.29313e-63	zormin
FBgn0013767	2394.85	-3.34949	0.246218	-13.6038	3.8036e-42	9.73303e-41	Crz	X	FBgn0038225	669.371	7.04755	0.611117	11.5322	9.08e-31	2.23e-29	soti	X	FBgn0250836	868.308	8.74705	0.51755	16.9009	4.43229e-64	1.13204e-62	CG8628
FBgn0025454	2257.36	7.58294	0.557848	13.5932	4.39443e-42	1.12156e-40	Cyp6g1	X	FBgn0031178	326.129	6.63285	0.575719	11.521	1.03e-30	2.53e-29	CG10918	X	FBgn0034435	788.049	6.91484	0.409439	16.8886	5.46168e-64	1.3913e-62	fest
FBgn0264489	4236.69	6.37319	0.469218	13.5826	5.08059e-42	1.2933e-40	CG43897	X	FBgn0034903	6241.51	7.71278	0.669445	11.5212	1.03e-30	2.53e-29	CG9850	X	FBgn0262146	576.378	7.99366	0.473995	16.8645	8.21586e-64	2.08743e-62	MtnE
FBgn0051148	472.841	8.474	0.624249	13.5747	5.65689e-42	1.43626e-40	Gba1a	X	FBgn0039620	2399.19	5.84368	0.507308	11.519	1.06e-30	2.58e-29	wat	X	FBgn0000557	11671.9	-3.65964	0.217109	-16.8562	9.44727e-64	2.39405e-62	Ef1alpha100E
FBgn0036146	1563.2	-4.77556	0.351964	-13.5683	6.1726e-42	1.56314e-40	CG14141	X	FBgn0031690	324.414	6.57611	0.572049	11.4957	1.39e-30	3.37e-29	CG7742	X	FBgn0000137	937.291	-4.34625	0.257965	-16.8482	1.08134e-63	2.73313e-62	ase
FBgn0085194	398.459	5.30887	0.392857	13.5135	1.30167e-41	3.2878e-40	CG34165	X	FBgn0038630	386.277	8.16421	0.710292	11.4942	1.41e-30	3.42e-29	CG14305	X	FBgn0036023	1196.5	10.048	0.597003	16.8308	1.45107e-63	3.65812e-62	CG18179
FBgn0038978	358.56	8.38083	0.620201	13.5131	1.30921e-41	3.29834e-40	tHMG1	X	FBgn0035196	782.685	6.93077	0.604872	11.4582	2.14e-30	5.17e-29	CG9129	X	FBgn0037683	741.158	6.57527	0.39076	16.8269	1.55066e-63	3.8991e-62	CG18473
FBgn0003046	5154.47	5.00694	0.371118	13.4915	1.75462e-41	4.40911e-40	Pcp	X	FBgn0039671	544.708	9.1438	0.799194	11.4413	2.6e-30	6.28e-29	CG11470	X	FBgn0037915	492.703	8.12687	0.483011	16.8254	1.58869e-63	3.98442e-62	CG6790
FBgn0265045	1264.57	4.44249	0.329321	13.4898	1.79506e-41	4.49916e-40	Strn-Mlck	X	FBgn0262722	871.744	9.65347	0.843871	11.4395	2.65e-30	6.39e-29	CR43166	X	FBgn0085195	63914.7	7.55819	0.44953	16.8135	1.94282e-63	4.86005e-62	CG34166
FBgn0260006	443.19	5.9548	0.442265	13.4643	2.53666e-41	6.34166e-40	drd	X	FBgn0029728	435.329	5.51214	0.482148	11.4325	2.88e-30	6.91e-29	CG2861	X	FBgn0035499	24137.9	5.1161	0.304508	16.8012	2.3912e-63	5.96636e-62	Chd64
FBgn0262952	51214.3	-5.50378	0.409827	-13.4295	4.05983e-41	1.01237e-39	ND4	X	FBgn0040519	1078.93	8.21238	0.720095	11.4046	3.97e-30	9.5e-29	CG15219	X	FBgn0050489	412.505	7.58098	0.451931	16.7746	3.74095e-63	9.31029e-62	Cyp12d1-p
FBgn0039239	905.896	7.26064	0.541138	13.4173	4.78523e-41	1.19022e-39	CG13641	X	FBgn0034546	269.174	6.69441	0.587043	11.4036	4.01e-30	9.58e-29	CG13442	X	FBgn0050371	2232.73	11.2535	0.671284	16.7641	4.46937e-63	1.10948e-61	CG30371
FBgn0035976	582.385	5.69392	0.424488	13.4136	5.03092e-41	1.24815e-39	PGRP-LC	X	FBgn0038214	945.394	7.76294	0.682145	11.3802	5.25e-30	1.25e-28	CG9616	X	FBgn0032218	877.04	5.24126	0.312841	16.7538	5.3164e-63	1.31638e-61	CG5381
FBgn0030544	1610.82	9.17783	0.684904	13.4002	6.03199e-41	1.49273e-39	CG13403	X	FBgn0037067	633.96	6.81876	0.600583	11.3536	7.12e-30	1.69e-28	Cpr78Ca	X	FBgn0038095	1285.91	7.10499	0.424927	16.7205	9.29548e-63	2.2958e-61	Cyp304a1
FBgn0034935	2647.73	-3.82027	0.285184	-13.3958	6.39688e-41	1.57903e-39	Orcokinin	X	FBgn0023549	612.237	5.9924	0.52805	11.3482	7.57e-30	1.8e-28	Mct1	X	FBgn0051103	1274.39	7.93528	0.475318	16.6947	1.43307e-62	3.53042e-61	CG31103
FBgn0035040	358.657	6.68493	0.502995	13.2903	2.63637e-40	6.49132e-39	CG4741	X	FBgn0027111	11596.6	-4.92428	0.434056	-11.3448	7.87e-30	1.86e-28	miple1	X	FBgn0035092	3051.77	-4.32007	0.259024	-16.6783	1.88645e-62	4.63561e-61	Nplp1
FBgn0001112	1329.83	6.51747	0.490633	13.2838	2.87393e-40	7.05774e-39	Gld	X	FBgn0250819	2028.96	4.81065	0.424176	11.3412	8.2e-30	1.94e-28	CG33521	X	FBgn0036877	1060.76	9.8257	0.589272	16.6743	2.01573e-62	4.94083e-61	CG9452
FBgn0039678	50199	-3.86482	0.290946	-13.2836	2.88086e-40	7.05774e-39	Obp99a	X	FBgn0001112	1766.57	6.01413	0.531071	11.3245	9.92e-30	2.33e-28	Gld	X	FBgn0004228	462.86	6.95482	0.417849	16.6443	3.32701e-62	8.13446e-61	mex1
FBgn0000615	1122.75	5.03608	0.379371	13.2748	3.24081e-40	7.91973e-39	exu	X	FBgn0013433	705.654	-7.14444	0.631799	-11.3081	1.2e-29	2.81e-28	beat-Ia	X	FBgn0001285	2114.73	11.3172	0.679996	16.643	3.40022e-62	8.29261e-61	Jon44E
FBgn0028412	519.34	5.99002	0.451329	13.272	3.36635e-40	8.20601e-39	Mst33A	X	FBgn0259994	6010.32	-4.15574	0.367794	-11.2991	1.33e-29	3.1e-28	CG42492	X	FBgn0035915	1967.56	7.66865	0.460924	16.6376	3.72545e-62	9.06309e-61	S-Lap1
FBgn0037801	719.674	6.57489	0.49556	13.2676	3.56883e-40	8.67793e-39	CG3999	X	FBgn0037601	779.586	5.37047	0.476769	11.2643	1.97e-29	4.6e-28	Cyp313b1	X	FBgn0267408	2398.3	4.87664	0.29319	16.6331	4.01485e-62	9.74278e-61	AOX1
FBgn0053196	5632.36	5.61699	0.423417	13.2659	3.65184e-40	8.85775e-39	dpy	X	FBgn0033936	830.017	6.66578	0.591862	11.2624	2.01e-29	4.69e-28	CG17386	X	FBgn0037678	1219.57	5.66507	0.34124	16.6014	6.80737e-62	1.64782e-60	CG16749
FBgn0284250	559.391	-5.83783	0.440079	-13.2654	3.67432e-40	8.89022e-39	Oaz	X	FBgn0034085	513.858	6.54252	0.580952	11.2617	2.03e-29	4.71e-28	Ptp52F	X	FBgn0037801	728.859	6.68833	0.403434	16.5785	9.96537e-62	2.40628e-60	CG3999
FBgn0267252	13074.8	-3.40261	0.256511	-13.265	3.69663e-40	8.92212e-39	Ggamma30A	X	FBgn0283651	1113.36	-5.27447	0.46845	-11.2594	2.08e-29	4.83e-28	CG46301	X	FBgn0032373	1116.23	10.5976	0.639291	16.5771	1.01988e-61	2.45654e-60	Vha100-5
FBgn0035092	3703.68	-3.88801	0.29352	-13.2461	4.75139e-40	1.14396e-38	Nplp1	X	FBgn0010014	4928.84	-4.46742	0.398324	-11.2155	3.42e-29	7.91e-28	CanB	X	FBgn0032269	512.583	7.49775	0.452332	16.5757	1.04357e-61	2.50741e-60	w-cup
FBgn0004362	34758.3	-3.00866	0.227139	-13.2459	4.7647e-40	1.14435e-38	HmgD	X	FBgn0051636	360.486	8.06123	0.7195	11.2039	3.9e-29	9e-28	CG31636	X	FBgn0036262	980.543	7.7907	0.471155	16.5353	2.0433e-61	4.89738e-60	CG6910
FBgn0037677	777.368	8.73077	0.659268	13.2431	4.94423e-40	1.18455e-38	CG12951	X	FBgn0085244	297.695	6.80295	0.607227	11.2033	3.93e-29	9.04e-28	CG34215	X	FBgn0040519	528.9	8.82149	0.534522	16.5035	3.46196e-61	8.27724e-60	CG15219
FBgn0000261	15831.4	3.64254	0.275238	13.2342	5.571e-40	1.32821e-38	Cat	X	FBgn0039008	327.145	5.94907	0.531186	11.1996	4.1e-29	9.41e-28	CG6972	X	FBgn0034132	831.591	9.09525	0.55117	16.5017	3.56515e-61	8.48227e-60	S-Lap8
FBgn0037941	495.197	-6.08606	0.45987	-13.2343	5.56045e-40	1.32821e-38	CG12594	X	FBgn0051909	508.753	8.48279	0.75771	11.1953	4.3e-29	9.85e-28	CG31909	X	FBgn0050091	411.084	6.98799	0.423469	16.5018	3.56305e-61	8.48227e-60	CG30091
FBgn0032824	2192.71	8.80114	0.666092	13.2131	7.37246e-40	1.75343e-38	CG13962	X	FBgn0004228	1058.03	6.97387	0.623103	11.1922	4.45e-29	1.02e-27	mex1	X	FBgn0036419	465.658	7.83593	0.47496	16.4981	3.78833e-61	8.99127e-60	CG13482
FBgn0002939	416.597	8.89451	0.673808	13.2004	8.73121e-40	2.07154e-38	ninaD	X	FBgn0051949	566.689	8.95418	0.801667	11.1695	5.75e-29	1.31e-27	CG31949	X	FBgn0259219	1017.85	6.46232	0.391991	16.4859	4.63604e-61	1.09765e-59	CG42319
FBgn0019828	330.235	7.43944	0.564036	13.1897	1.00629e-39	2.3817e-38	dj	X	FBgn0038366	1156.08	5.73205	0.513527	11.1621	6.25e-29	1.42e-27	CG4576	X	FBgn0027106	428.945	6.13997	0.372842	16.468	6.23012e-61	1.47149e-59	Inx7
FBgn0036361	735.183	10.5585	0.802078	13.164	1.41459e-39	3.34001e-38	CG10154	X	FBgn0033582	762.409	5.37148	0.481904	11.1464	7.46e-29	1.69e-27	CG9084	X	FBgn0085197	477.541	8.43715	0.512449	16.4644	6.61619e-61	1.55889e-59	CG34168
FBgn0033113	413.444	6.01965	0.457295	13.1636	1.42127e-39	3.3477e-38	Spn42Dc	X	FBgn0259184	342.877	7.27562	0.653559	11.1323	8.73e-29	1.98e-27	CG42288	X	FBgn0011555	743.399	10.0078	0.607961	16.4613	6.95574e-61	1.63494e-59	thetaTry
FBgn0038943	8272.52	8.57651	0.651709	13.16	1.49024e-39	3.50171e-38	CG5391	X	FBgn0029708	3406.55	-4.71913	0.424704	-11.1116	1.1e-28	2.49e-27	CG3556	X	FBgn0037672	1764.63	6.3491	0.38632	16.4348	1.07742e-60	2.52636e-59	sage
FBgn0039722	2756.78	-4.60302	0.349966	-13.1528	1.64048e-39	3.84549e-38	Capa	X	FBgn0051820	801.89	8.2903	0.746332	11.1081	1.15e-28	2.58e-27	CG31820	X	FBgn0260400	3900.17	-3.673	0.22352	-16.4326	1.11825e-60	2.61579e-59	elav
FBgn0036778	381.219	7.93557	0.60378	13.1431	1.86321e-39	4.35714e-38	Cyp312a1	X	FBgn0029932	529.231	4.69912	0.423294	11.1013	1.24e-28	2.78e-27	CG4607	X	FBgn0037697	9386.14	-4.42643	0.269807	-16.4059	1.73476e-60	4.04819e-59	GstZ2
FBgn0051041	902.642	7.09799	0.540566	13.1307	2.19718e-39	5.12588e-38	CG31041	X	FBgn0034538	1510.47	6.23557	0.562716	11.0812	1.55e-28	3.47e-27	CG16799	X	FBgn0040350	702.622	9.53481	0.581847	16.3871	2.36307e-60	5.50122e-59	CG3690
FBgn0020300	608.387	4.51404	0.343973	13.1232	2.42397e-39	5.64151e-38	geko	X	FBgn0037579	650.376	6.09063	0.551244	11.0489	2.22e-28	4.96e-27	COX7AL	X	FBgn0036410	1587.37	7.25741	0.443791	16.3532	4.12702e-60	9.58473e-59	CG8100
FBgn0053200	1560.89	-5.24757	0.400199	-13.1124	2.79656e-39	6.49321e-38	VepD	X	FBgn0037169	333.668	9.06482	0.821515	11.0343	2.61e-28	5.83e-27	CG11404	X	FBgn0035550	1032.86	5.01401	0.30679	16.3435	4.84057e-60	1.12151e-58	CG11349
FBgn0039886	519.238	5.01911	0.383052	13.1029	3.16715e-39	7.33624e-38	CG2003	X	FBgn0037678	1096.81	5.46784	0.496905	11.0038	3.66e-28	8.15e-27	CG16749	X	FBgn0250819	1036.56	4.3835	0.268365	16.3341	5.64769e-60	1.30541e-58	CG33521
FBgn0032284	2923.95	7.06322	0.539163	13.1003	3.27777e-39	7.57452e-38	CG7294	X	FBgn0031489	966.171	4.65446	0.423395	10.9932	4.12e-28	9.15e-27	CG17224	X	FBgn0030697	639.007	9.43473	0.577691	16.3318	5.86451e-60	1.35231e-58	CG8565
FBgn0004228	625.482	7.55315	0.576812	13.0946	3.53313e-39	8.14536e-38	mex1	X	FBgn0032771	265.464	7.61149	0.693503	10.9754	5.02e-28	1.11e-26	CG17349	X	FBgn0051988	370.706	7.24044	0.443716	16.3177	7.38286e-60	1.69841e-58	CG31988
FBgn0051778	5931.89	7.90573	0.604113	13.0865	3.93268e-39	9.04516e-38	CG31778	X	FBgn0039238	753.962	5.4433	0.496317	10.9674	5.48e-28	1.21e-26	CG7016	X	FBgn0064237	500.367	8.91924	0.546724	16.314	7.85224e-60	1.80213e-58	Idgf5
FBgn0051660	1711.7	-4.66239	0.356866	-13.0648	5.23146e-39	1.20041e-37	smog	X	FBgn0032946	7835.06	-4.05446	0.370149	-10.9536	6.39e-28	1.41e-26	nrv3	X	FBgn0034128	2874.22	-5.47758	0.336435	-16.2812	1.34158e-59	3.07175e-58	CG4409
FBgn0023179	1036.41	-4.18894	0.32074	-13.0602	5.55658e-39	1.27203e-37	amon	X	FBgn0030191	414.991	8.20894	0.749615	10.9509	6.58e-28	1.44e-26	CG15306	X	FBgn0036272	1924.02	-3.45941	0.212489	-16.2804	1.35934e-59	3.10511e-58	CG4300
FBgn0262972	64743.1	-5.00934	0.383967	-13.0463	6.67284e-39	1.524e-37	CR43283	X	FBgn0033888	257.83	6.35041	0.5799	10.9509	6.58e-28	1.44e-26	CG18568	X	FBgn0030073	558.978	7.09176	0.435849	16.2712	1.58158e-59	3.60429e-58	CG10962
FBgn0020385	1114.54	5.22896	0.400847	13.0448	6.80618e-39	1.55083e-37	pug	X	FBgn0050456	611.589	5.6409	0.51524	10.9481	6.79e-28	1.49e-26	CG30456	X	FBgn0038540	1779.54	-3.705	0.228037	-16.2474	2.3308e-59	5.29931e-58	CG14321
FBgn0039827	503.669	4.35995	0.334492	13.0346	7.78223e-39	1.7691e-37	CG1544	X	FBgn0040717	3729.65	6.54714	0.59818	10.9451	7.01e-28	1.53e-26	Nplp4	X	FBgn0032280	6357.85	8.73004	0.537536	16.2408	2.59312e-59	5.88197e-58	CG17105
FBgn0035176	479.25	6.21922	0.477594	13.022	9.17697e-39	2.08132e-37	CG13905	X	FBgn0031737	1331.41	6.63985	0.607126	10.9365	7.71e-28	1.68e-26	obst-E	X	FBgn0003961	1290.11	11.2852	0.69605	16.2132	4.06951e-59	9.20939e-58	Uro
FBgn0005626	7747.65	6.74506	0.519335	12.9879	1.4333e-38	3.24318e-37	ple	X	FBgn0036437	275.697	8.5117	0.778513	10.9333	7.99e-28	1.74e-26	CG5048	X	FBgn0262577	7292.47	7.90233	0.487775	16.2008	4.97879e-59	1.1241e-57	CG43117
FBgn0037204	873.123	6.61029	0.509431	12.9758	1.67735e-38	3.78663e-37	CG11131	X	FBgn0004175	784.215	8.35489	0.7652	10.9186	9.4e-28	2.04e-26	Mst84Dd	X	FBgn0035091	969.424	5.19547	0.321111	16.1797	7.0146e-59	1.58007e-57	CG3829
FBgn0038492	439.519	7.98688	0.616121	12.9632	1.97885e-38	4.45697e-37	Mur89F	X	FBgn0035040	662.483	6.70175	0.614357	10.9086	1.05e-27	2.27e-26	CG4741	X	FBgn0033760	389.747	8.16598	0.505366	16.1586	9.88558e-59	2.22163e-57	CG8785
FBgn0053527	1269.34	-5.4696	0.421982	-12.9617	2.01777e-38	4.53419e-37	SIFa	X	FBgn0052279	2197.1	8.4562	0.776401	10.8915	1.26e-27	2.73e-26	Drsl2	X	FBgn0035844	1885.85	4.44404	0.27527	16.1443	1.24577e-58	2.79322e-57	CG13676
FBgn0039482	2715.57	8.87945	0.685547	12.9524	2.2783e-38	5.10789e-37	CG14258	X	FBgn0035770	1477.59	5.11488	0.470056	10.8814	1.41e-27	3.04e-26	pst	X	FBgn0035176	380.73	5.89195	0.364982	16.1431	1.26969e-58	2.84032e-57	CG13905
FBgn0039620	1994.18	7.00162	0.540989	12.9423	2.59883e-38	5.81316e-37	wat	X	FBgn0265313	284.347	7.31075	0.672601	10.8694	1.61e-27	3.47e-26	CG44286	X	FBgn0058469	7066.41	-4.9858	0.309408	-16.114	2.03396e-58	4.53955e-57	CR40469
FBgn0015001	292.9	6.60346	0.512588	12.8826	5.64167e-38	1.25907e-36	iotaTry	X	FBgn0031515	2380.84	4.89536	0.450828	10.8586	1.82e-27	3.89e-26	CG9664	X	FBgn0038979	398.393	6.67278	0.414309	16.1058	2.3232e-58	5.17324e-57	tHMG2
FBgn0033958	600.963	-7.95788	0.617851	-12.8799	5.83827e-38	1.29998e-36	jef	X	FBgn0035985	2182.38	7.40195	0.68167	10.8586	1.82e-27	3.89e-26	Cpr67B	X	FBgn0034140	8188.29	7.40799	0.46022	16.0966	2.69317e-58	5.98338e-57	Lst
FBgn0028396	1395.21	7.2083	0.560022	12.8715	6.51619e-38	1.44763e-36	TotA	X	FBgn0036085	343.796	5.43147	0.500262	10.8572	1.84e-27	3.93e-26	CG6527	X	FBgn0025620	1632.64	7.9868	0.496525	16.0854	3.22952e-58	7.14238e-57	CG13360
FBgn0028394	969.355	4.48906	0.34925	12.8534	8.22831e-38	1.82385e-36	CG17834	X	FBgn0036759	1285.57	4.53232	0.418342	10.834	2.37e-27	5.06e-26	CG5577	X	FBgn0033294	512.918	6.35085	0.394818	16.0855	3.22293e-58	7.14238e-57	Mal-A4
FBgn0036622	342.621	6.41362	0.499215	12.8474	8.89338e-38	1.96681e-36	CG4753	X	FBgn0085273	3157.56	7.31654	0.675506	10.8312	2.45e-27	5.21e-26	CG34244	X	FBgn0037064	360.672	7.03164	0.437826	16.0603	4.83967e-58	1.06791e-56	CG9389
FBgn0265726	2313.8	5.40127	0.420795	12.8359	1.03235e-37	2.27792e-36	Nna1	X	FBgn0086907	270.187	7.57754	0.701829	10.7969	3.56e-27	7.55e-26	Cyt-c-d	X	FBgn0033138	467.16	8.66239	0.539644	16.052	5.53209e-58	1.21794e-56	Tsp42Eq
FBgn0027491	1618.28	-3.39902	0.264971	-12.8279	1.14391e-37	2.51275e-36	Cdk5alpha	X	FBgn0031128	229.932	6.34252	0.587527	10.7953	3.62e-27	7.67e-26	hydra	X	FBgn0264347	444.983	6.07491	0.378755	16.0391	6.81068e-58	1.49604e-56	CR43803
FBgn0051321	419.308	6.10273	0.475732	12.8281	1.14177e-37	2.51275e-36	CG31321	X	FBgn0267811	243.887	7.65386	0.70989	10.7818	4.2e-27	8.86e-26	CR46136	X	FBgn0038083	692.748	9.90628	0.618563	16.015	1.00431e-57	2.20111e-56	CG5999
FBgn0051820	283.179	7.61054	0.595427	12.7816	2.07638e-37	4.55082e-36	CG31820	X	FBgn0033093	2235.22	6.36322	0.59135	10.7605	5.29e-27	1.11e-25	CG3270	X	FBgn0031129	405.473	7.99901	0.499677	16.0084	1.117e-57	2.44259e-56	CG1324
FBgn0041194	684.286	8.38073	0.656086	12.7738	2.29584e-37	5.02055e-36	Prat2	X	FBgn0038312	1699.34	4.25302	0.395439	10.7552	5.6e-27	1.18e-25	Zip88E	X	FBgn0028670	7371.64	3.52508	0.220208	16.008	1.12406e-57	2.45252e-56	Vha100-2
FBgn0038095	764.825	6.63404	0.519455	12.7711	2.3765e-37	5.18533e-36	Cyp304a1	X	FBgn0034365	1419.11	4.01857	0.374372	10.7342	7.04e-27	1.48e-25	CG5335	X	FBgn0026428	2168.77	3.50283	0.21883	16.0071	1.13941e-57	2.48044e-56	HDAC6
FBgn0033777	4518.21	3.14798	0.246868	12.7517	3.05124e-37	6.64273e-36	CG17574	X	FBgn0040371	424.978	6.43575	0.599657	10.7324	7.17e-27	1.5e-25	CG12470	X	FBgn0034662	894.657	10.4967	0.656507	15.9887	1.53212e-57	3.32792e-56	CG13492
FBgn0263006	16697.7	3.41513	0.267978	12.744	3.36516e-37	7.30987e-36	SERCA	X	FBgn0033366	1239.97	6.51128	0.607545	10.7174	8.44e-27	1.76e-25	Ance-4	X	FBgn0023197	431.007	8.42453	0.527103	15.9827	1.68707e-57	3.65633e-56	Jon74E
FBgn0259716	850.247	8.60006	0.676686	12.7091	5.2646e-37	1.14105e-35	CG42370	X	FBgn0039152	501.35	4.94018	0.461102	10.7139	8.76e-27	1.83e-25	Root	X	FBgn0046294	1774.78	8.73058	0.546926	15.963	2.31337e-57	5.00254e-56	CG12699
FBgn0034162	1196.95	3.88259	0.305553	12.7067	5.42478e-37	1.17317e-35	CG6426	X	FBgn0025643	1842.76	7.08926	0.662008	10.7087	9.26e-27	1.92e-25	CG3588	X	FBgn0039470	846.983	9.79888	0.613889	15.962	2.35205e-57	5.0749e-56	CG6296
FBgn0032538	2659.04	8.25726	0.650252	12.6986	6.02322e-37	1.29971e-35	CG16885	X	FBgn0050339	287.315	6.55623	0.612655	10.7014	1e-26	2.08e-25	CG30339	X	FBgn0034162	2002.4	5.34014	0.334962	15.9425	3.21055e-57	6.89666e-56	CG6426
FBgn0034788	811.872	-3.76567	0.296644	-12.6942	6.3643e-37	1.37029e-35	CG13532	X	FBgn0032727	2180.76	4.01482	0.375557	10.6903	1.13e-26	2.34e-25	CG10623	X	FBgn0250871	1899.24	4.66847	0.29283	15.9426	3.20731e-57	6.89666e-56	pot
FBgn0052633	648.782	10.4026	0.819533	12.6933	6.43818e-37	1.38315e-35	CG32633	X	FBgn0039104	900.975	7.39087	0.69176	10.6842	1.21e-26	2.49e-25	CG10252	X	FBgn0037107	792.94	-4.41822	0.277695	-15.9103	5.37248e-57	1.15153e-55	CG7166
FBgn0032100	385.965	-4.90449	0.386449	-12.6912	6.61894e-37	1.41886e-35	CG13108	X	FBgn0034075	991.824	4.88064	0.456869	10.6828	1.23e-26	2.52e-25	Asph	X	FBgn0259685	1025.9	3.98063	0.250267	15.9055	5.80266e-57	1.241e-55	crb
FBgn0033821	1083.42	7.73968	0.610203	12.6838	7.27349e-37	1.55576e-35	CG10799	X	FBgn0038079	1252.94	5.40153	0.506045	10.674	1.35e-26	2.77e-25	NijC	X	FBgn0023549	554.288	5.51372	0.347346	15.8739	9.6129e-57	2.05138e-55	Mct1
FBgn0036563	374.585	8.98634	0.708506	12.6835	7.2998e-37	1.55798e-35	CG13075	X	FBgn0036205	415.824	7.27128	0.681384	10.6713	1.39e-26	2.84e-25	CG14131	X	FBgn0032187	519.835	5.4257	0.342179	15.8563	1.27129e-56	2.70699e-55	CG4839
FBgn0040340	10356	3.71617	0.293498	12.6617	9.64459e-37	2.05394e-35	TRAM	X	FBgn0036544	902.199	-5.55719	0.521013	-10.6661	1.47e-26	3e-25	sff	X	FBgn0051226	513.342	8.90813	0.562463	15.8377	1.7093e-56	3.63171e-55	CG31226
FBgn0034301	406.718	7.30872	0.57839	12.6363	1.3316e-36	2.82966e-35	CG5756	X	FBgn0053120	212.356	7.30498	0.68684	10.6356	2.03e-26	4.15e-25	CG33120	X	FBgn0040364	556.597	6.42097	0.406003	15.8151	2.44902e-56	5.19203e-55	CG11378
FBgn0038453	4691.57	-2.97611	0.235715	-12.6259	1.52014e-36	3.22328e-35	CG10326	X	FBgn0036360	1513.5	-5.55622	0.523395	-10.6157	2.52e-26	5.13e-25	CG10713	X	FBgn0025684	4810.36	3.36833	0.213006	15.8133	2.51829e-56	5.32728e-55	MFS18
FBgn0034356	1623.54	5.38789	0.427061	12.6162	1.71895e-36	3.63695e-35	CG10924	X	FBgn0065032	678.811	5.51778	0.519969	10.6117	2.63e-26	5.34e-25	Arpc3B	X	FBgn0034294	1785.27	10.198	0.645235	15.805	2.8717e-56	6.06172e-55	Muc55B
FBgn0034512	1524.71	4.41288	0.350112	12.6042	2.00249e-36	4.22772e-35	CG18067	X	FBgn0034740	270.225	7.48693	0.705627	10.6103	2.67e-26	5.41e-25	nsr	X	FBgn0038598	682.223	4.80005	0.303922	15.7937	3.43723e-56	7.23977e-55	CG7131
FBgn0052279	1843.67	7.82296	0.620918	12.599	2.13797e-36	4.50402e-35	Drsl2	X	FBgn0050091	361.508	7.04913	0.664406	10.6097	2.69e-26	5.44e-25	CG30091	X	FBgn0010225	3542.06	2.92335	0.185183	15.7863	3.86783e-56	8.12912e-55	Gel
FBgn0035844	2111.67	5.07825	0.403361	12.5899	2.40104e-36	5.04734e-35	CG13676	X	FBgn0031208	329.259	7.49273	0.706461	10.606	2.79e-26	5.65e-25	CG11023	X	FBgn0001208	1672.57	7.81822	0.495718	15.7715	4.888e-56	1.02511e-54	Hn
FBgn0036410	2195.32	8.54642	0.679091	12.5851	2.55056e-36	5.35016e-35	CG8100	X	FBgn0032785	1549.98	4.14372	0.391476	10.5848	3.5e-26	7.06e-25	CG10026	X	FBgn0035343	893.446	10.2632	0.65115	15.7617	5.71078e-56	1.19509e-54	CG16762
FBgn0036311	308.671	7.33483	0.583419	12.5722	3.00403e-36	6.28787e-35	CG17666	X	FBgn0038037	7033.74	4.05526	0.383352	10.5784	3.75e-26	7.55e-25	Cyp9f2	X	FBgn0085453	2420.22	4.78706	0.303822	15.7561	6.23437e-56	1.30186e-54	CG34424
FBgn0030362	21506.9	4.2206	0.336336	12.5488	4.03663e-36	8.43122e-35	regucalcin	X	FBgn0259794	363.741	8.74252	0.826718	10.575	3.89e-26	7.81e-25	sinah	X	FBgn0032538	3142.16	8.12454	0.516114	15.7418	7.82464e-56	1.63044e-54	CG16885
FBgn0028993	3727.13	-3.64061	0.29051	-12.5318	5.0029e-36	1.04272e-34	scro	X	FBgn0032651	1867.07	-4.80809	0.454963	-10.5681	4.19e-26	8.39e-25	Oli	X	FBgn0040099	2118.73	4.18102	0.265696	15.7361	8.55313e-56	1.77843e-54	lectin-28C
FBgn0032638	784.203	8.24109	0.657652	12.5311	5.04709e-36	1.04969e-34	SPH93	X	FBgn0031939	1245.17	4.46139	0.422211	10.5667	4.25e-26	8.5e-25	CG13796	X	FBgn0015801	3285.34	3.57885	0.228166	15.6853	1.90616e-55	3.95499e-54	Reg-5
FBgn0010435	1869.81	3.81994	0.304935	12.5271	5.30984e-36	1.10199e-34	emp	X	FBgn0261835	735.358	6.77706	0.641953	10.5569	4.72e-26	9.41e-25	CR42767	X	FBgn0030310	890.441	5.21139	0.332543	15.6713	2.37558e-55	4.91847e-54	PGRP-SA
FBgn0011555	471.904	8.48898	0.677777	12.5247	5.46785e-36	1.13238e-34	thetaTry	X	FBgn0033968	4034.41	4.98311	0.472187	10.5533	4.91e-26	9.76e-25	hui	X	FBgn0003162	4710.35	5.15304	0.328929	15.6661	2.57747e-55	5.32513e-54	Pu
FBgn0015570	355.331	8.10345	0.647728	12.5106	6.53492e-36	1.3505e-34	alpha-Est2	X	FBgn0086915	493.866	6.01502	0.57064	10.5408	5.6e-26	1.11e-24	Mst77F	X	FBgn0063127	10306	-3.62331	0.231991	-15.6184	5.45873e-55	1.1254e-53	pncr002:3R
FBgn0034490	370.601	6.30918	0.505257	12.4871	8.78114e-36	1.81088e-34	CG9864	X	FBgn0040747	496.614	8.44228	0.802558	10.5192	7.05e-26	1.4e-24	CG12853	X	FBgn0052690	433.165	6.75779	0.432731	15.6166	5.61222e-55	1.1546e-53	CR32690
FBgn0035246	8909.9	-3.38548	0.271237	-12.4817	9.39961e-36	1.93434e-34	CG13928	X	FBgn0037672	2243.68	5.50058	0.523165	10.514	7.44e-26	1.47e-24	sage	X	FBgn0033600	2843.91	7.31543	0.468727	15.607	6.52215e-55	1.33897e-53	Cpr47Ec
FBgn0052652	566.932	7.20692	0.577787	12.4733	1.04385e-35	2.14363e-34	CR32652	X	FBgn0037283	526.12	7.38114	0.702303	10.5099	7.78e-26	1.53e-24	CG14658	X	FBgn0031034	1635.74	7.69484	0.493551	15.5908	8.41087e-55	1.72308e-53	CG14205
FBgn0037283	332.235	7.39956	0.593422	12.4693	1.09781e-35	2.2497e-34	CG14658	X	FBgn0015001	329.44	5.67998	0.540767	10.5036	8.32e-26	1.64e-24	iotaTry	X	FBgn0036948	761.266	9.1602	0.588209	15.573	1.11006e-54	2.26933e-53	CG7298
FBgn0028516	425.427	5.62272	0.45169	12.4482	1.43053e-35	2.92539e-34	ZnT35C	X	FBgn0015570	448.43	7.37464	0.702987	10.4904	9.56e-26	1.88e-24	alpha-Est2	X	FBgn0034295	700.263	10.142	0.651421	15.5691	1.18094e-54	2.40917e-53	CG10911
FBgn0016715	1327.5	6.79734	0.546318	12.4421	1.54393e-35	3.14416e-34	Reg-2	X	FBgn0250904	764.206	6.63164	0.632942	10.4775	1.1e-25	2.15e-24	CG34434	X	FBgn0039671	417.145	7.99491	0.514449	15.5407	1.83936e-54	3.74453e-53	CG11470
FBgn0035412	1034.17	7.48189	0.601331	12.4422	1.54173e-35	3.14416e-34	CG14957	X	FBgn0046332	264.394	7.7288	0.737734	10.4764	1.11e-25	2.17e-24	gskt	X	FBgn0030615	422.908	8.25692	0.531412	15.5377	1.92806e-54	3.9169e-53	Cyp4s3
FBgn0032685	915.568	5.99271	0.483232	12.4013	2.57116e-35	5.22517e-34	CG10211	X	FBgn0003046	5007.24	5.20925	0.499274	10.4336	1.74e-25	3.4e-24	Pcp	X	FBgn0010435	1842.12	3.2751	0.210993	15.5223	2.44993e-54	4.95917e-53	emp
FBgn0052220	470.412	-7.2916	0.588133	-12.3979	2.68383e-35	5.44282e-34	Csas	X	FBgn0035780	680.7	4.86814	0.466985	10.4246	1.91e-25	3.73e-24	CG18417	X	FBgn0034025	6242.73	4.45445	0.286971	15.5223	2.4513e-54	4.95917e-53	GalNAc-T1
FBgn0033951	1195.32	-3.35306	0.270496	-12.396	2.74793e-35	5.56128e-34	CG10139	X	FBgn0036481	532.851	5.2263	0.501785	10.4154	2.11e-25	4.1e-24	CG16959	X	FBgn0037730	946.48	6.7048	0.432281	15.5103	2.95549e-54	5.96677e-53	CG9444
FBgn0036835	1697.67	-4.33973	0.350439	-12.3837	3.2036e-35	6.47008e-34	CG14075	X	FBgn0005626	9569.6	5.89969	0.566715	10.4103	2.22e-25	4.32e-24	ple	X	FBgn0050339	418.268	7.79924	0.503003	15.5054	3.19102e-54	6.42895e-53	CG30339
FBgn0040364	428.11	5.4162	0.437503	12.3798	3.36149e-35	6.77496e-34	CG11378	X	FBgn0265182	1035.31	-4.41804	0.424412	-10.4098	2.24e-25	4.33e-24	CG44247	X	FBgn0034085	438.912	7.13112	0.460189	15.4961	3.6874e-54	7.41366e-53	Ptp52F
FBgn0035612	6677.75	7.11267	0.574728	12.3757	3.53672e-35	7.11346e-34	frm	X	FBgn0051076	5147.66	5.48808	0.527346	10.407	2.3e-25	4.45e-24	CG31076	X	FBgn0033484	3573.6	-3.58098	0.231196	-15.489	4.11949e-54	8.26531e-53	CG2269
FBgn0026197	158255	-5.38709	0.435329	-12.3748	3.5797e-35	7.17039e-34	noe	X	FBgn0037592	7760.16	4.40556	0.423528	10.402	2.43e-25	4.68e-24	CG11737	X	FBgn0036773	1474.04	3.23193	0.208789	15.4794	4.77809e-54	9.567e-53	CG13698
FBgn0036926	6160.95	-4.41447	0.356731	-12.3748	3.57725e-35	7.17039e-34	CG7646	X	FBgn0027570	2335.2	4.88459	0.469698	10.3994	2.49e-25	4.8e-24	Nep2	X	FBgn0034011	622.659	6.78825	0.440499	15.4104	1.39372e-53	2.78487e-52	CG8160
FBgn0030277	298.237	8.477	0.68615	12.3544	4.60904e-35	9.21337e-34	CG1394	X	FBgn0038416	224.058	7.09471	0.68238	10.397	2.56e-25	4.92e-24	CG17930	X	FBgn0003060	1073.52	8.82581	0.572856	15.4067	1.47611e-53	2.94346e-52	CG9757
FBgn0040636	1014.58	4.04467	0.327401	12.3539	4.64107e-35	9.25846e-34	CG13255	X	FBgn0038697	361.448	7.18282	0.691175	10.3922	2.69e-25	5.16e-24	CG3581	X	FBgn0030593	966.581	3.85105	0.250364	15.3818	2.16878e-53	4.31582e-52	CG9512
FBgn0040398	8626.69	7.1799	0.581411	12.3491	4.9261e-35	9.80705e-34	CG14629	X	FBgn0051370	812.388	5.28242	0.508612	10.3859	2.87e-25	5.5e-24	CG31370	X	FBgn0015570	653.838	7.78873	0.506377	15.3813	2.18592e-53	4.34106e-52	alpha-Est2
FBgn0031163	287.068	7.75915	0.628746	12.3407	5.46959e-35	1.08669e-33	CG14579	X	FBgn0021776	2024.51	-4.91102	0.473055	-10.3815	3.01e-25	5.75e-24	mira	X	FBgn0034538	1181.84	6.61226	0.43053	15.3584	3.11124e-53	6.16608e-52	CG16799
FBgn0040859	413.973	4.46643	0.362548	12.3195	7.10971e-35	1.40968e-33	CR32658	X	FBgn0265508	277.478	6.54248	0.630254	10.3807	3.04e-25	5.78e-24	CR44370	X	FBgn0050009	3029.23	-5.17785	0.337397	-15.3465	3.73986e-53	7.39687e-52	CR30009
FBgn0033443	303.83	6.51366	0.528879	12.316	7.43144e-35	1.47049e-33	CG1698	X	FBgn0037461	239.172	6.49942	0.62639	10.376	3.19e-25	6.06e-24	CG15177	X	FBgn0034253	492.279	5.48381	0.357678	15.3317	4.69694e-53	9.27098e-52	CG10936
FBgn0032218	1042.74	6.13212	0.49825	12.3073	8.27359e-35	1.63383e-33	CG5381	X	FBgn0036109	457.16	8.14772	0.785349	10.3746	3.23e-25	6.14e-24	Cpr67Fa2	X	FBgn0035348	2968.93	4.44376	0.290099	15.3181	5.78807e-53	1.14016e-51	CG16758
FBgn0034999	2538.56	7.06456	0.574388	12.2993	9.13945e-35	1.80117e-33	CG3394	X	FBgn0031561	507.881	7.64928	0.737787	10.3679	3.47e-25	6.58e-24	IM33	X	FBgn0033582	441.423	4.86296	0.317561	15.3135	6.21514e-53	1.22181e-51	CG9084
FBgn0030357	1652.25	5.25923	0.427741	12.2953	9.59405e-35	1.88696e-33	Sclp	X	FBgn0034162	2528.97	5.37852	0.518892	10.3654	3.56e-25	6.73e-24	CG6426	X	FBgn0000261	14743.7	3.02212	0.197538	15.2989	7.7718e-53	1.52475e-51	Cat
FBgn0022355	11698.8	4.46095	0.363188	12.2828	1.12103e-34	2.20041e-33	Tsf1	X	FBgn0040842	384.747	7.21082	0.695793	10.3635	3.64e-25	6.86e-24	CG15212	X	FBgn0033542	332.75	6.43634	0.421292	15.2776	1.0777e-52	2.11008e-51	CG12309
FBgn0002565	24683.9	7.16758	0.58427	12.2676	1.35239e-34	2.64392e-33	Lsp2	X	FBgn0034082	646.847	5.48108	0.529303	10.3553	3.96e-25	7.46e-24	CG10734	X	FBgn0014368	1485.77	8.63408	0.56544	15.2697	1.218e-52	2.37999e-51	nol
FBgn0030191	506.298	10.0147	0.81635	12.2677	1.35003e-34	2.64392e-33	CG15306	X	FBgn0034499	437.689	7.02104	0.678594	10.3464	4.34e-25	8.16e-24	Cpr56F	X	FBgn0030876	1529.99	4.86025	0.318362	15.2664	1.28003e-52	2.49619e-51	CG6762
FBgn0085195	65738.2	7.41626	0.604754	12.2633	1.4266e-34	2.78344e-33	CG34166	X	FBgn0265375	273.913	7.17812	0.694606	10.3341	4.94e-25	9.26e-24	CR44316	X	FBgn0035926	792.635	9.20562	0.603444	15.2552	1.52133e-52	2.96082e-51	CG5804
FBgn0051051	529.141	-4.00672	0.327035	-12.2517	1.646e-34	3.20511e-33	CG31051	X	FBgn0028879	409.491	-6.38357	0.617773	-10.3332	4.99e-25	9.33e-24	CG15270	X	FBgn0004362	23847.1	-2.9689	0.194635	-15.2537	1.55622e-52	3.02268e-51	HmgD
FBgn0037934	508.82	7.69838	0.628843	12.2421	1.85094e-34	3.59701e-33	CG6830	X	FBgn0025709	311.607	6.17495	0.59824	10.3219	5.61e-25	1.05e-23	CG8083	X	FBgn0033887	488.377	7.8661	0.515775	15.251	1.62057e-52	3.1414e-51	St4
FBgn0085453	1387.41	4.31114	0.35247	12.2312	2.11695e-34	4.10579e-33	CG34424	X	FBgn0051698	15929.9	13.3486	1.29457	10.3112	6.27e-25	1.17e-23	CG31698	X	FBgn0035189	1319.9	3.69114	0.242124	15.2448	1.78197e-52	3.44739e-51	CG9119
FBgn0085359	3798.19	8.75405	0.716169	12.2234	2.33029e-34	4.51061e-33	CG34330	X	FBgn0032869	603.457	5.92595	0.574748	10.3105	6.32e-25	1.18e-23	CG17470	X	FBgn0040636	893.409	4.31287	0.283249	15.2264	2.36143e-52	4.55933e-51	CG13255
FBgn0037844	1317.99	-5.89378	0.48248	-12.2156	2.56649e-34	4.95799e-33	CG4570	X	FBgn0030975	301.732	7.47478	0.725716	10.2999	7.06e-25	1.31e-23	SdhBL	X	FBgn0028526	553.745	7.4106	0.487013	15.2164	2.75062e-52	5.30025e-51	CG15293
FBgn0259994	5089.48	-3.98881	0.326743	-12.2078	2.82476e-34	5.44616e-33	CG42492	X	FBgn0265089	384.761	5.95599	0.578571	10.2943	7.47e-25	1.39e-23	eIF4E-3	X	FBgn0036927	5999.21	-3.58841	0.235887	-15.2124	2.92456e-52	5.62428e-51	Gabat
FBgn0037167	1527.67	-3.46849	0.284286	-12.2007	3.08076e-34	5.92803e-33	CG11425	X	FBgn0035358	262.057	5.60219	0.544254	10.2933	7.55e-25	1.4e-23	CG14949	X	FBgn0039332	2631.62	-4.68046	0.30793	-15.1997	3.55004e-52	6.8137e-51	alrm
FBgn0034756	294.29	7.66142	0.628115	12.1975	3.20647e-34	6.15781e-33	Cyp6d2	X	FBgn0053307	836.931	6.39283	0.621198	10.2911	7.73e-25	1.43e-23	CG33307	X	FBgn0039473	1280.58	11.5946	0.763082	15.1945	3.84767e-52	7.37041e-51	CG17191
FBgn0263234	976.066	11.3877	0.93402	12.1921	3.42313e-34	6.561e-33	Phae1	X	FBgn0038466	306.532	8.97143	0.87279	10.279	8.76e-25	1.61e-23	CG8907	X	FBgn0011722	996.7	4.7587	0.313354	15.1864	4.35479e-52	8.32544e-51	Tig
FBgn0040321	1629.88	4.65082	0.381518	12.1903	3.50045e-34	6.69607e-33	GNBP3	X	FBgn0004108	7014.33	-4.44287	0.432584	-10.2705	9.57e-25	1.76e-23	Nrt	X	FBgn0039840	315.321	7.76408	0.511615	15.1756	5.12954e-52	9.78737e-51	CG11340
FBgn0010591	3310.23	3.30299	0.270964	12.1898	3.52397e-34	6.7279e-33	Sply	X	FBgn0264894	2167.99	4.23039	0.412371	10.2587	1.08e-24	1.98e-23	CG44085	X	FBgn0032733	292.017	5.63233	0.371314	15.1687	5.70181e-52	1.0858e-50	CG15170
FBgn0262531	3563.53	-3.14246	0.257866	-12.1864	3.67131e-34	6.99553e-33	CG43085	X	FBgn0034470	8045.22	7.58105	0.741271	10.2271	1.5e-24	2.75e-23	Obp56d	X	FBgn0030102	1267.66	8.96484	0.591187	15.1641	6.10944e-52	1.16115e-50	SmydA-9
FBgn0035409	776.538	6.34585	0.520822	12.1843	3.76849e-34	7.16673e-33	CG14963	X	FBgn0035161	397.73	6.21739	0.608034	10.2254	1.53e-24	2.79e-23	CG13898	X	FBgn0034899	1157.74	9.65043	0.637195	15.1452	8.15217e-52	1.54637e-50	CG13560
FBgn0036891	301.804	4.67676	0.38406	12.1772	4.11279e-34	7.80632e-33	CG9372	X	FBgn0250815	256662	13.5014	1.32107	10.2201	1.61e-24	2.94e-23	Jon65Aiv	X	FBgn0031813	1706.87	3.37618	0.222949	15.1433	8.39241e-52	1.58884e-50	CG9527
FBgn0263029	3665.59	-4.39596	0.36115	-12.1721	4.37595e-34	8.27368e-33	CG43324	X	FBgn0028394	1299.01	4.03763	0.395498	10.209	1.81e-24	3.29e-23	CG17834	X	FBgn0033129	404.891	8.60183	0.568271	15.1368	9.25721e-52	1.74916e-50	Tsp42Eh
FBgn0264606	414.681	-5.72193	0.470084	-12.1721	4.37448e-34	8.27368e-33	Fife	X	FBgn0034011	541.241	7.36234	0.72189	10.1987	2.01e-24	3.65e-23	CG8160	X	FBgn0035776	386.669	7.6606	0.506932	15.1117	1.35611e-51	2.55742e-50	CG8564
FBgn0039494	551.427	4.63306	0.380648	12.1715	4.40805e-34	8.31827e-33	grass	X	FBgn0037801	747.183	6.16077	0.60422	10.1962	2.06e-24	3.74e-23	CG3999	X	FBgn0050457	1410.13	8.55009	0.565808	15.1113	1.36448e-51	2.56824e-50	CG30457
FBgn0265182	841.463	-3.60553	0.296335	-12.1671	4.65587e-34	8.76901e-33	CG44247	X	FBgn0002531	116533	8.6837	0.852721	10.1835	2.35e-24	4.25e-23	Lcp1	X	FBgn0052571	691.256	8.08632	0.53544	15.1022	1.56612e-51	2.94207e-50	TwdlX
FBgn0039130	3193.8	2.8516	0.234391	12.166	4.7157e-34	8.86461e-33	CG5854	X	FBgn0264563	387.693	8.12825	0.798445	10.1801	2.43e-24	4.4e-23	CG43935	X	FBgn0036759	1018.89	3.87111	0.25663	15.0844	2.05272e-51	3.84874e-50	CG5577
FBgn0033287	480.393	5.16644	0.424759	12.1632	4.87915e-34	9.15426e-33	CG8701	X	FBgn0013342	4366.1	-3.99721	0.392657	-10.1799	2.44e-24	4.4e-23	nSyb	X	FBgn0010241	483.64	7.35331	0.488323	15.0583	3.04565e-51	5.69946e-50	Mdr50
FBgn0037601	670.537	4.99083	0.410726	12.1513	5.64871e-34	1.05778e-32	Cyp313b1	X	FBgn0085280	269.122	6.30958	0.620993	10.1605	2.98e-24	5.36e-23	CG34251	X	FBgn0052198	1277.85	10.5688	0.702876	15.0365	4.2349e-51	7.90976e-50	CG32198
FBgn0284244	1847.91	4.76448	0.392481	12.1394	6.52976e-34	1.22043e-32	l(2)k05911	X	FBgn0034128	4768.58	-4.94051	0.486447	-10.1563	3.11e-24	5.58e-23	CG4409	X	FBgn0035131	656.646	3.86192	0.257954	14.9713	1.13048e-50	2.10741e-49	mthl9
FBgn0039051	247.52	6.16113	0.508561	12.1148	8.81608e-34	1.6446e-32	CG17109	X	FBgn0033238	205.085	7.6756	0.756431	10.1471	3.41e-24	6.12e-23	azot	X	FBgn0032897	6966.31	3.00412	0.201397	14.9164	2.57793e-50	4.79652e-49	CG9336
FBgn0028537	1716.48	7.16643	0.591958	12.1063	9.7778e-34	1.82053e-32	CG31775	X	FBgn0028379	366.158	7.92524	0.783534	10.1147	4.75e-24	8.51e-23	fan	X	FBgn0029752	973.403	6.48302	0.435133	14.8989	3.34808e-50	6.21758e-49	TrxT
FBgn0031322	930.209	3.49049	0.288761	12.0878	1.22487e-33	2.27625e-32	CG5001	X	FBgn0260428	253.011	7.43388	0.735617	10.1056	5.22e-24	9.32e-23	CG42523	X	FBgn0001311	945.415	3.97349	0.266766	14.8951	3.54915e-50	6.57844e-49	kkv
FBgn0039299	7672.95	8.66595	0.717276	12.0818	1.3188e-33	2.44616e-32	CG11854	X	FBgn0038756	1629.98	6.43299	0.636794	10.1021	5.4e-24	9.64e-23	CG4783	X	FBgn0038373	414.589	8.26712	0.555185	14.8907	3.78526e-50	7.00274e-49	CG4546
FBgn0030041	1880.14	8.24184	0.682841	12.0699	1.52269e-33	2.819e-32	CG12116	X	FBgn0029750	314.585	5.04473	0.499665	10.0962	5.74e-24	1.02e-22	CG3323	X	FBgn0031937	869.446	6.4669	0.434338	14.8891	3.88121e-50	7.16661e-49	CG13795
FBgn0001197	21465.9	-2.82858	0.235043	-12.0343	2.34703e-33	4.33691e-32	His2Av	X	FBgn0259823	569.235	-6.58644	0.652966	-10.087	6.31e-24	1.12e-22	CG42404	X	FBgn0085330	462.129	9.32332	0.627085	14.8677	5.34002e-50	9.84162e-49	CG34301
FBgn0033124	1552.45	8.79713	0.731231	12.0306	2.45407e-33	4.52615e-32	Tsp42Ec	X	FBgn0085190	230.957	7.19039	0.713191	10.082	6.64e-24	1.18e-22	CG34161	X	FBgn0035677	841.796	-4.55059	0.307215	-14.8124	1.21851e-49	2.24146e-48	CG13293
FBgn0037114	35591.3	7.36894	0.613216	12.0169	2.89727e-33	5.33348e-32	Cpr78E	X	FBgn0263239	584.252	5.43078	0.538749	10.0803	6.75e-24	1.19e-22	dar1	X	FBgn0031424	2379.44	-3.58031	0.241764	-14.8091	1.27964e-49	2.34946e-48	VGlut
FBgn0267726	683.176	6.78212	0.564615	12.0119	3.07566e-33	5.65124e-32	CG46059	X	FBgn0069354	583.169	5.9168	0.58776	10.0667	7.75e-24	1.37e-22	Porin2	X	FBgn0032945	940.829	7.80162	0.527018	14.8033	1.39447e-49	2.55548e-48	CG8665
FBgn0050046	265.887	5.01931	0.418206	12.002	3.46821e-33	6.36055e-32	CG30046	X	FBgn0036529	461.528	6.18708	0.615069	10.0592	8.37e-24	1.48e-22	pgant8	X	FBgn0259680	336.365	5.37189	0.36294	14.801	1.44216e-49	2.6379e-48	Pkcdelta
FBgn0011581	2352.94	-3.33155	0.278391	-11.9672	5.28037e-33	9.66585e-32	Ms	X	FBgn0035094	1095.69	4.06897	0.404651	10.0555	8.69e-24	1.53e-22	CG9380	X	FBgn0050172	1988.27	-4.39093	0.296667	-14.8009	1.44569e-49	2.63941e-48	CG30172
FBgn0030615	332.619	7.8231	0.6538	11.9656	5.38159e-33	9.83271e-32	Cyp4s3	X	FBgn0038655	318.517	7.70213	0.765966	10.0555	8.69e-24	1.53e-22	CG14297	X	FBgn0263598	18940.8	2.64077	0.178465	14.7971	1.52904e-49	2.78634e-48	Vha68-2
FBgn0003060	439.069	9.00992	0.753106	11.9637	5.50564e-33	1.00406e-31	CG9757	X	FBgn0040383	3726.49	4.04876	0.403418	10.0361	1.06e-23	1.85e-22	CG5254	X	FBgn0005626	5878.88	6.41812	0.433833	14.794	1.60235e-49	2.91448e-48	ple
FBgn0064237	336.136	9.11483	0.762089	11.9603	5.73436e-33	1.04382e-31	Idgf5	X	FBgn0013949	2239.06	3.92463	0.391707	10.0193	1.25e-23	2.19e-22	Elal	X	FBgn0045770	1061.71	8.51824	0.575855	14.7923	1.64194e-49	2.98093e-48	S-Lap3
FBgn0031327	604.513	4.29528	0.359401	11.9512	6.39968e-33	1.16277e-31	CG5397	X	FBgn0037040	294.951	7.33154	0.732623	10.0072	1.42e-23	2.47e-22	CG12983	X	FBgn0264894	2004.91	4.4811	0.303975	14.7417	3.47908e-49	6.30445e-48	CG44085
FBgn0004106	2735.54	-3.26808	0.273464	-11.9507	6.43939e-33	1.16781e-31	Cdk1	X	FBgn0032294	237.699	7.3892	0.739137	9.99706	1.57e-23	2.74e-22	Vha16-5	X	FBgn0052191	305.176	6.50612	0.441861	14.7244	4.49721e-49	8.13426e-48	CG32191
FBgn0034221	397.027	4.44122	0.37168	11.949	6.56789e-33	1.18891e-31	CG10764	X	FBgn0030356	341.879	6.06653	0.606939	9.99529	1.6e-23	2.78e-22	CR32661	X	FBgn0015010	2314.17	8.21869	0.558421	14.7177	4.95954e-49	8.95385e-48	Ag5r
FBgn0033320	535.73	10.1244	0.84782	11.9416	7.17905e-33	1.29714e-31	CG8586	X	FBgn0010407	1429.65	-4.63091	0.463579	-9.98948	1.69e-23	2.94e-22	Ror	X	FBgn0053481	2902.3	-4.11895	0.280225	-14.6987	6.56788e-49	1.18356e-47	dpr7
FBgn0051118	1240.22	-3.29785	0.276448	-11.9294	8.32073e-33	1.50065e-31	RabX4	X	FBgn0262605	499.832	6.9279	0.693612	9.98815	1.72e-23	2.98e-22	CG43131	X	FBgn0028394	799.49	3.93174	0.267691	14.6876	7.73617e-49	1.39151e-47	CG17834
FBgn0039683	1067.55	-4.88725	0.410251	-11.9128	1.01482e-32	1.82687e-31	dmrt99B	X	FBgn0035434	1156.09	6.04471	0.606302	9.9698	2.07e-23	3.58e-22	Drsl5	X	FBgn0052279	698.771	7.64818	0.521597	14.663	1.11238e-48	1.99715e-47	Drsl2
FBgn0030929	778.717	5.92104	0.497261	11.9073	1.08423e-32	1.94823e-31	CG15043	X	FBgn0036106	1616.23	7.73554	0.777048	9.95503	2.4e-23	4.14e-22	CG6409	X	FBgn0040321	1286.59	4.29261	0.292982	14.6514	1.31931e-48	2.36431e-47	GNBP3
FBgn0030260	3061.72	-4.45682	0.374512	-11.9004	1.17844e-32	2.11363e-31	CG1537	X	FBgn0000557	16168.7	-4.17871	0.419837	-9.95317	2.44e-23	4.21e-22	Ef1alpha100E	X	FBgn0035583	964.03	11.1766	0.763769	14.6334	1.71864e-48	3.07428e-47	CG13704
FBgn0035360	737.02	5.75737	0.483986	11.8957	1.24548e-32	2.22977e-31	CG1246	X	FBgn0039083	274.121	6.56574	0.660189	9.94524	2.65e-23	4.55e-22	CG10177	X	FBgn0004427	920.215	10.5408	0.720811	14.6236	1.98725e-48	3.54825e-47	LysD
FBgn0036756	655.805	6.97038	0.586414	11.8864	1.39222e-32	2.48792e-31	cln3	X	FBgn0005659	300.533	5.75178	0.578395	9.94439	2.67e-23	4.58e-22	Ets98B	X	FBgn0034883	461.799	5.06638	0.346653	14.6151	2.24861e-48	4.00755e-47	Eglp2
FBgn0065032	480.3	6.59215	0.555669	11.8635	1.83257e-32	3.26886e-31	Arpc3B	X	FBgn0261989	3021.45	5.05382	0.508951	9.92988	3.09e-23	5.29e-22	CG42807	X	FBgn0031092	13383.1	3.90821	0.267429	14.614	2.2871e-48	4.0687e-47	CG9577
FBgn0036046	1464.6	-5.61458	0.473701	-11.8526	2.08657e-32	3.71516e-31	Ilp2	X	FBgn0042119	228.214	6.44287	0.648891	9.92904	3.11e-23	5.33e-22	Cpr65Au	X	FBgn0033788	458.737	7.94949	0.544131	14.6095	2.44268e-48	4.33755e-47	CG13323
FBgn0035196	373.33	5.4407	0.459712	11.835	2.57242e-32	4.57188e-31	CG9129	X	FBgn0035092	3189.08	-4.21614	0.425079	-9.9185	3.46e-23	5.91e-22	Nplp1	X	FBgn0025709	275.834	6.73987	0.461874	14.5924	3.1374e-48	5.56102e-47	CG8083
FBgn0035300	828.946	4.36164	0.368972	11.8211	3.03808e-32	5.38969e-31	CG1139	X	FBgn0050277	348.594	8.6751	0.875751	9.9059	3.92e-23	6.69e-22	Oatp58Da	X	FBgn0086358	1251.58	3.93693	0.27009	14.5764	3.97104e-48	7.02585e-47	Tab2
FBgn0010482	1257.08	6.26882	0.530434	11.8183	3.1405e-32	5.56131e-31	l(2)01289	X	FBgn0031343	240.041	8.35227	0.843853	9.89777	4.26e-23	7.25e-22	CG18131	X	FBgn0053192	259.748	7.57701	0.520401	14.5599	5.05058e-48	8.91963e-47	MtnD
FBgn0020642	539.907	8.4555	0.715531	11.8171	3.18456e-32	5.62913e-31	Lcp65Ac	X	FBgn0000153	872.413	5.091	0.514552	9.89404	4.42e-23	7.51e-22	b	X	FBgn0038829	9061.35	2.69802	0.18531	14.5595	5.07992e-48	8.9552e-47	CG17271
FBgn0001122	7832.61	-3.10817	0.263272	-11.8059	3.63721e-32	6.41764e-31	Galphao	X	FBgn0033301	476.655	7.39063	0.747446	9.88784	4.7e-23	7.97e-22	CG12780	X	FBgn0034860	3576	5.141	0.353197	14.5556	5.37972e-48	9.46655e-47	CG9812
FBgn0086675	20264.8	-4.94164	0.418613	-11.8048	3.68737e-32	6.49442e-31	fne	X	FBgn0039241	8107.66	3.90722	0.3952	9.88671	4.75e-23	8.05e-22	CG11089	X	FBgn0033729	962.18	7.96586	0.547337	14.5538	5.52069e-48	9.69709e-47	Cpr49Af
FBgn0036364	1060.34	7.89657	0.669351	11.7974	4.02761e-32	7.08091e-31	CG14109	X	FBgn0037222	313.9	5.16627	0.523159	9.87516	5.33e-23	9.02e-22	CG14642	X	FBgn0028886	392.776	7.06936	0.486399	14.5341	7.37148e-48	1.29247e-46	CG15279
FBgn0010407	906.869	-6.81937	0.57825	-11.7931	4.23562e-32	7.43325e-31	Ror	X	FBgn0051287	517.541	5.48067	0.556018	9.85701	6.39e-23	1.08e-21	CG31287	X	FBgn0032520	268.521	6.44153	0.443359	14.5289	7.94509e-48	1.39053e-46	CG10859
FBgn0283651	1128.74	-4.74345	0.40264	-11.7809	4.89769e-32	8.57973e-31	CG46301	X	FBgn0264308	924.066	-4.19737	0.42608	-9.85113	6.78e-23	1.14e-21	CG43778	X	FBgn0038681	1299.47	4.15821	0.286338	14.5221	8.78176e-48	1.53421e-46	Cyp12a4
FBgn0029955	365.062	-4.44796	0.379494	-11.7208	9.97805e-32	1.74482e-30	CG15478	X	FBgn0027585	935.226	4.3794	0.445083	9.83952	7.61e-23	1.28e-21	CG8740	X	FBgn0085427	916.076	4.22522	0.291368	14.5013	1.18819e-47	2.07208e-46	CG34398
FBgn0063083	559.507	8.59721	0.733927	11.714	1.08086e-31	1.88669e-30	pncr015:3L	X	FBgn0035584	204.977	8.05463	0.818657	9.83883	7.66e-23	1.28e-21	CG17030	X	FBgn0034920	509.471	6.0621	0.418123	14.4984	1.24067e-47	2.15974e-46	CG5597
FBgn0036786	659.941	-4.90565	0.419029	-11.7072	1.1708e-31	2.04003e-30	skl	X	FBgn0038966	1896.06	4.03661	0.410267	9.83898	7.65e-23	1.28e-21	pinta	X	FBgn0040371	258.971	6.47623	0.446834	14.4936	1.33042e-47	2.31184e-46	CG12470
FBgn0033760	303.952	7.67734	0.656122	11.7011	1.25825e-31	2.18851e-30	CG8785	X	FBgn0051665	809.693	-5.19934	0.528941	-9.82971	8.39e-23	1.4e-21	wry	X	FBgn0065032	563.436	6.13871	0.424724	14.4534	2.38527e-47	4.13745e-46	Arpc3B
FBgn0035398	624.981	5.28516	0.451807	11.6978	1.30788e-31	2.27078e-30	Cht7	X	FBgn0000241	394.486	5.54915	0.564556	9.82922	8.43e-23	1.41e-21	bw	X	FBgn0037677	1078.23	9.4042	0.65121	14.4411	2.85107e-47	4.93661e-46	CG12951
FBgn0033582	366.928	4.64506	0.397284	11.692	1.4001e-31	2.42659e-30	CG9084	X	FBgn0028983	3738.56	3.49276	0.355453	9.82623	8.68e-23	1.45e-21	Spn55B	X	FBgn0033999	814.356	9.77348	0.676798	14.4408	2.86664e-47	4.95475e-46	CG8093
FBgn0034663	862.579	8.6045	0.736997	11.6751	1.70923e-31	2.95711e-30	CG4363	X	FBgn0038979	1195.84	7.60432	0.774927	9.81295	9.9e-23	1.65e-21	tHMG2	X	FBgn0041102	897.354	8.67057	0.600588	14.4368	3.03658e-47	5.23918e-46	ocn
FBgn0040717	1977.82	4.26867	0.365906	11.666	1.90068e-31	3.28253e-30	Nplp4	X	FBgn0032774	7669.93	4.99771	0.50957	9.8077	1.04e-22	1.73e-21	CG17549	X	FBgn0034197	369.342	7.91293	0.548324	14.4311	3.29625e-47	5.67713e-46	Cda9
FBgn0264502	1123.51	-4.62114	0.397033	-11.6392	2.60476e-31	4.49057e-30	CG43901	X	FBgn0014141	4905.47	5.26866	0.537434	9.80336	1.09e-22	1.8e-21	cher	X	FBgn0030051	2262.15	5.76729	0.399805	14.4253	3.58848e-47	6.16952e-46	spirit
FBgn0010397	1388.9	3.34195	0.287413	11.6277	2.98109e-31	5.1303e-30	LamC	X	FBgn0030247	374.385	4.67759	0.477887	9.78806	1.27e-22	2.1e-21	CG15208	X	FBgn0260440	1247.15	-4.16232	0.28863	-14.4209	3.82106e-47	6.5578e-46	spdo
FBgn0038837	753.85	-3.75369	0.323465	-11.6046	3.90428e-31	6.70727e-30	CG3822	X	FBgn0034978	785.837	-5.67131	0.579538	-9.78592	1.29e-22	2.14e-21	CG3257	X	FBgn0039051	394.017	5.13429	0.356266	14.4114	4.38763e-47	7.51691e-46	CG17109
FBgn0027843	1289.58	3.45434	0.29768	11.6042	3.92468e-31	6.73048e-30	CAH2	X	FBgn0032900	852.209	3.86789	0.396497	9.75514	1.75e-22	2.89e-21	CG14401	X	FBgn0022893	24405.5	-3.21086	0.22314	-14.3895	6.02579e-47	1.03053e-45	Df31
FBgn0041713	346.78	7.23561	0.623782	11.5996	4.14115e-31	7.08928e-30	yellow-c	X	FBgn0053318	326.081	8.0529	0.825979	9.74952	1.85e-22	3.05e-21	CR33318	X	FBgn0053346	1561.74	11.8804	0.82737	14.3592	9.33106e-47	1.59299e-45	CG33346
FBgn0031693	395.965	5.99039	0.517272	11.5807	5.16023e-31	8.8184e-30	Cyp4ac1	X	FBgn0033113	373.898	5.74223	0.589092	9.74759	1.89e-22	3.1e-21	Spn42Dc	X	FBgn0028567	381.52	8.40955	0.585771	14.3564	9.71782e-47	1.65611e-45	robl62A
FBgn0000422	5418.42	3.80672	0.328805	11.5774	5.36248e-31	9.14803e-30	Ddc	X	FBgn0030300	593.543	4.60968	0.473011	9.7454	1.93e-22	3.17e-21	Sk1	X	FBgn0031004	350.281	7.82221	0.545146	14.3488	1.08343e-46	1.84316e-45	CG7992
FBgn0005775	1240.29	-5.26141	0.454567	-11.5746	5.54615e-31	9.44488e-30	Con	X	FBgn0035665	113922	13.2038	1.35511	9.74376	1.96e-22	3.21e-21	Jon65Aiii	X	FBgn0053120	420.577	8.13842	0.567911	14.3305	1.41167e-46	2.39737e-45	CG33120
FBgn0038135	526.54	8.5515	0.739425	11.5651	6.19387e-31	1.05296e-29	CG8773	X	FBgn0259678	703.887	6.21974	0.638788	9.73678	2.1e-22	3.43e-21	sqa	X	FBgn0027600	1149.39	3.93469	0.275211	14.297	2.28503e-46	3.8738e-45	obst-B
FBgn0032021	5493.53	-4.15235	0.359109	-11.5629	6.35114e-31	1.07782e-29	CG7781	X	FBgn0039872	438.874	5.90639	0.606948	9.7313	2.22e-22	3.62e-21	salt	X	FBgn0086915	328.513	6.37126	0.446099	14.2822	2.82728e-46	4.78475e-45	Mst77F
FBgn0010423	1448.34	6.56056	0.5677	11.5564	6.85273e-31	1.16093e-29	TpnC47D	X	FBgn0030362	32692.6	4.42164	0.454587	9.72672	2.32e-22	3.78e-21	regucalcin	X	FBgn0029932	637.664	5.87093	0.411448	14.2689	3.41687e-46	5.7725e-45	CG4607
FBgn0030968	719.216	3.94333	0.341306	11.5537	7.07423e-31	1.19638e-29	CG7322	X	FBgn0032219	296.059	7.30835	0.752059	9.71779	2.53e-22	4.12e-21	CG4995	X	FBgn0034588	1001.19	4.576	0.320709	14.2684	3.44398e-46	5.80821e-45	CG9394
FBgn0265276	11883.6	-3.23132	0.279794	-11.5489	7.4745e-31	1.26189e-29	l(3)neo38	X	FBgn0039714	2552.04	3.643	0.375191	9.7097	2.74e-22	4.45e-21	Zip99C	X	FBgn0027560	849.238	6.90613	0.484111	14.2656	3.58599e-46	6.03724e-45	Tps1
FBgn0086917	5624.7	-4.18211	0.36294	-11.5229	1.01165e-30	1.70499e-29	spok	X	FBgn0051861	343.088	5.77478	0.595285	9.70087	2.99e-22	4.84e-21	CG31861	X	FBgn0039886	969.521	4.51124	0.316369	14.2594	3.91635e-46	6.58203e-45	CG2003
FBgn0026428	1545.08	3.43147	0.298018	11.5143	1.11767e-30	1.88042e-29	HDAC6	X	FBgn0031937	729.385	6.03334	0.62241	9.69352	3.21e-22	5.2e-21	CG13795	X	FBgn0035196	395.415	5.96658	0.418657	14.2517	4.37407e-46	7.33864e-45	CG9129
FBgn0069354	349.11	5.11307	0.444171	11.5115	1.15473e-30	1.93944e-29	Porin2	X	FBgn0030594	1742.29	4.71213	0.486146	9.69283	3.23e-22	5.22e-21	CG9509	X	FBgn0038248	325.758	7.59712	0.533517	14.2397	5.1957e-46	8.70212e-45	CG7886
FBgn0015801	2457.56	3.65207	0.317376	11.5071	1.21544e-30	2.03789e-29	Reg-5	X	FBgn0014865	740.928	9.13886	0.943325	9.68792	3.39e-22	5.47e-21	Mtk	X	FBgn0030776	318.027	7.38886	0.519647	14.219	6.98373e-46	1.16767e-44	CG4653
FBgn0034614	664.38	-3.48607	0.303062	-11.5028	1.27662e-30	2.13681e-29	CG9752	X	FBgn0039054	1680.68	-4.68155	0.483346	-9.6857	3.47e-22	5.58e-21	Cow	X	FBgn0259150	633.983	-3.79973	0.26745	-14.2072	8.26107e-46	1.37888e-44	CG42265
FBgn0032770	195.802	7.20256	0.626634	11.4941	1.41315e-30	2.36128e-29	CG13086	X	FBgn0085345	204.6	5.96627	0.616377	9.67958	3.68e-22	5.92e-21	CG34316	X	FBgn0032382	663.431	3.3679	0.237302	14.1925	1.01981e-45	1.69928e-44	Mal-B2
FBgn0032820	974.893	3.4133	0.297528	11.4722	1.8197e-30	3.03541e-29	fbp	X	FBgn0040859	702.455	5.27176	0.544778	9.6769	3.78e-22	6.06e-21	CR32658	X	FBgn0028371	1932.8	4.19188	0.295505	14.1855	1.12676e-45	1.87427e-44	jbug
FBgn0026438	1251.6	-3.47029	0.302518	-11.4713	1.83797e-30	3.06068e-29	Eaat2	X	FBgn0083943	406.725	8.11783	0.840272	9.66095	4.42e-22	7.07e-21	CG34107	X	FBgn0051820	247.904	7.63437	0.538951	14.1653	1.5033e-45	2.49636e-44	CG31820
FBgn0027601	3969.2	2.63239	0.229484	11.4709	1.84657e-30	3.06976e-29	pdgy	X	FBgn0036202	3607.55	-4.20705	0.435692	-9.65602	4.64e-22	7.41e-21	CG6024	X	FBgn0085446	5757.54	3.1645	0.223748	14.1431	2.05925e-45	3.41373e-44	CG34417
FBgn0030347	343.42	4.92098	0.429163	11.4665	1.94452e-30	3.2271e-29	CG15739	X	FBgn0034582	258.532	7.88633	0.816964	9.65321	4.76e-22	7.6e-21	Cht9	X	FBgn0037579	345.542	5.17171	0.36608	14.1273	2.57959e-45	4.26905e-44	COX7AL
FBgn0032727	1608.92	3.94104	0.343819	11.4625	2.03458e-30	3.37085e-29	CG10623	X	FBgn0025595	393.226	5.91434	0.612901	9.64974	4.93e-22	7.85e-21	AkhR	X	FBgn0261565	2810.21	3.19451	0.226417	14.1089	3.346e-45	5.528e-44	Lmpt
FBgn0008636	557.14	-4.15196	0.362467	-11.4547	2.22708e-30	3.68353e-29	hbn	X	FBgn0034920	473.597	5.63246	0.584108	9.64284	5.27e-22	8.38e-21	CG5597	X	FBgn0030398	766.085	6.2324	0.442332	14.0899	4.38291e-45	7.22884e-44	Cpr11B
FBgn0039795	508.724	5.58339	0.487847	11.445	2.49224e-30	4.11515e-29	Spn100A	X	FBgn0052450	427.662	6.03082	0.625626	9.63966	5.44e-22	8.63e-21	CG32450	X	FBgn0026403	461.797	4.91376	0.349286	14.068	5.97297e-45	9.83468e-44	Ndg
FBgn0040351	378.649	-4.25388	0.372147	-11.4306	2.93928e-30	4.8451e-29	CG11638	X	FBgn0035976	782.452	4.38526	0.455039	9.63709	5.57e-22	8.83e-21	PGRP-LC	X	FBgn0036945	1526.21	5.1142	0.363676	14.0625	6.45354e-45	1.0608e-43	Ssk
FBgn0029831	1248.91	6.52369	0.571007	11.4249	3.14027e-30	5.16771e-29	CG5966	X	FBgn0038921	311.738	6.98231	0.725142	9.62889	6.04e-22	9.55e-21	CG6332	X	FBgn0036831	758.74	9.81494	0.698647	14.0485	7.86926e-45	1.29133e-43	CG6839
FBgn0031515	1520.41	4.90249	0.42913	11.4243	3.16332e-30	5.19688e-29	CG9664	X	FBgn0000108	6052.97	-4.27411	0.444376	-9.61825	6.7e-22	1.06e-20	Appl	X	FBgn0033054	1099	-3.73569	0.265972	-14.0454	8.21738e-45	1.34618e-43	CG14591
FBgn0261565	2824.92	3.45485	0.302578	11.418	3.39779e-30	5.57272e-29	Lmpt	X	FBgn0050414	759.239	4.66149	0.484643	9.6184	6.69e-22	1.06e-20	CG30414	X	FBgn0035246	9603.58	-3.45079	0.245924	-14.0319	9.9401e-45	1.62567e-43	CG13928
FBgn0061356	830.035	7.34105	0.643196	11.4134	3.58425e-30	5.86869e-29	CG18003	X	FBgn0003378	60628.6	12.6068	1.31138	9.61341	7.02e-22	1.1e-20	Sgs8	X	FBgn0002862	533.191	7.74012	0.551883	14.0249	1.0974e-44	1.79175e-43	Mst87F
FBgn0027106	332.738	6.37299	0.559023	11.4002	4.17003e-30	6.8164e-29	Inx7	X	FBgn0085465	274.567	6.20931	0.646226	9.60856	7.36e-22	1.16e-20	CG34436	X	FBgn0034229	866.269	8.11979	0.579025	14.0232	1.12393e-44	1.83198e-43	CG4847
FBgn0051226	625.574	7.86667	0.691073	11.3833	5.06608e-30	8.26726e-29	CG31226	X	FBgn0039719	217.37	7.15201	0.744501	9.60646	7.51e-22	1.18e-20	CG15515	X	FBgn0039030	703.142	6.52802	0.466209	14.0023	1.50832e-44	2.45442e-43	CG6660
FBgn0043578	572.121	6.77974	0.59563	11.3825	5.11381e-30	8.33124e-29	PGRP-SB1	X	FBgn0025712	3809.65	-4.10785	0.427621	-9.60628	7.52e-22	1.18e-20	CG13920	X	FBgn0034144	665.703	10.3013	0.735958	13.9971	1.62255e-44	2.6359e-43	CG5089
FBgn0035767	1465.36	3.79689	0.333634	11.3804	5.23684e-30	8.51749e-29	CG8596	X	FBgn0039883	1353.13	-4.76223	0.4958	-9.60515	7.6e-22	1.19e-20	RhoGAP100F	X	FBgn0265089	280.697	6.49943	0.4649	13.9803	2.05706e-44	3.33621e-43	eIF4E-3
FBgn0029821	367.603	5.02605	0.441708	11.3787	5.34045e-30	8.67157e-29	CG4020	X	FBgn0283437	2430.97	5.54315	0.577146	9.6044	7.66e-22	1.2e-20	PPO1	X	FBgn0033287	456.746	4.85884	0.347565	13.9797	2.07412e-44	3.35828e-43	CG8701
FBgn0036687	191.589	6.43706	0.565928	11.3744	5.61164e-30	9.09681e-29	CG6652	X	FBgn0028644	429.234	-5.41042	0.563789	-9.59653	8.27e-22	1.29e-20	beat-Ic	X	FBgn0063368	655.894	-5.48809	0.393529	-13.9458	3.33573e-44	5.39202e-43	Gpb5
FBgn0266937	2345.59	-5.10322	0.448816	-11.3704	5.87252e-30	9.50395e-29	CR45388	X	FBgn0033542	350.176	5.73372	0.597606	9.59448	8.43e-22	1.31e-20	CG12309	X	FBgn0061356	744.795	6.16529	0.442119	13.9449	3.38137e-44	5.45673e-43	CG18003
FBgn0033129	357.749	8.20848	0.722119	11.3672	6.09018e-30	9.83992e-29	Tsp42Eh	X	FBgn0031092	16834.1	3.83444	0.399758	9.59189	8.65e-22	1.34e-20	CG9577	X	FBgn0038292	609.669	5.57464	0.400065	13.9344	3.91729e-44	6.31112e-43	CG3987
FBgn0035147	3505.15	2.96917	0.261362	11.3604	6.58464e-30	1.06213e-28	Gale	X	FBgn0259680	309.326	4.86306	0.507251	9.58708	9.06e-22	1.41e-20	Pkcdelta	X	FBgn0028532	403.129	8.68932	0.62437	13.9169	4.99885e-44	8.04031e-43	CG7968
FBgn0034011	253.104	6.59571	0.580865	11.355	7.00654e-30	1.12832e-28	CG8160	X	FBgn0034127	258.578	6.90439	0.72025	9.58609	9.15e-22	1.42e-20	CG7848	X	FBgn0021800	2338.54	-2.8326	0.203656	-13.9088	5.60266e-44	8.99662e-43	Reph
FBgn0034276	492.458	7.36285	0.648552	11.3527	7.18668e-30	1.15542e-28	Sardh	X	FBgn0037388	201.657	7.68886	0.802205	9.58465	9.28e-22	1.43e-20	CG14676	X	FBgn0036337	4741.88	3.64222	0.261877	13.9082	5.6521e-44	9.06105e-43	AdenoK
FBgn0036782	365.793	8.22258	0.724492	11.3494	7.46461e-30	1.19814e-28	CG7320	X	FBgn0028516	549.164	5.65699	0.590442	9.58095	9.62e-22	1.48e-20	ZnT35C	X	FBgn0035147	4144.9	2.75591	0.198746	13.8665	1.01054e-43	1.61735e-42	Gale
FBgn0013272	3842.13	2.83698	0.24999	11.3483	7.55818e-30	1.21117e-28	Gp150	X	FBgn0004047	350.165	4.98917	0.521023	9.57572	1.01e-21	1.56e-20	Yp3	X	FBgn0031769	7100.19	-3.1011	0.223814	-13.8557	1.17522e-43	1.87784e-42	CG9135
FBgn0058469	25412	-6.69646	0.590301	-11.3441	7.92963e-30	1.26706e-28	CR40469	X	FBgn0053481	3839.75	-3.987	0.416465	-9.57345	1.03e-21	1.59e-20	dpr7	X	FBgn0030148	533.612	8.38229	0.60526	13.8491	1.28876e-43	2.05589e-42	CG3106
FBgn0063493	1483.66	6.33201	0.558176	11.3441	7.93292e-30	1.26706e-28	GstE7	X	FBgn0037463	288.431	7.37271	0.77046	9.56924	1.08e-21	1.65e-20	djl	X	FBgn0030595	910.14	7.52918	0.543741	13.847	1.32635e-43	2.11239e-42	CG14406
FBgn0002736	6268.09	-3.09044	0.27275	-11.3307	9.2491e-30	1.47488e-28	mago	X	FBgn0040718	1695.97	5.51149	0.576611	9.55842	1.2e-21	1.83e-20	CG15353	X	FBgn0085428	376.6	5.23437	0.37825	13.8384	1.49536e-43	2.37767e-42	Nox
FBgn0036323	345.833	6.92181	0.612076	11.3087	1.18774e-29	1.8909e-28	CG14118	X	FBgn0020300	1167.7	5.04012	0.527887	9.54772	1.33e-21	2.03e-20	geko	X	FBgn0032652	525.491	6.79374	0.491	13.8365	1.53441e-43	2.43578e-42	CG6870
FBgn0266936	303.078	-4.77232	0.422091	-11.3064	1.22005e-29	1.93918e-28	CR45387	X	FBgn0033705	248.434	5.60786	0.587467	9.54584	1.35e-21	2.06e-20	CG13168	X	FBgn0030277	341.797	8.05045	0.582607	13.818	1.98566e-43	3.14698e-42	CG1394
FBgn0028400	3905.81	-4.43226	0.392254	-11.2995	1.32019e-29	2.09494e-28	Syt4	X	FBgn0033742	326.738	5.0736	0.531871	9.53915	1.44e-21	2.2e-20	CG8550	X	FBgn0031533	252.508	7.79681	0.564276	13.8174	2.00209e-43	3.16787e-42	CG2772
FBgn0011288	1960.32	-3.73092	0.330542	-11.2873	1.51633e-29	2.40229e-28	Snap25	X	FBgn0043578	590.46	6.64789	0.697293	9.53385	1.52e-21	2.31e-20	PGRP-SB1	X	FBgn0039722	1345.67	-3.97745	0.287951	-13.8129	2.12937e-43	3.36379e-42	Capa
FBgn0038165	1367.28	-3.86486	0.342898	-11.2712	1.82165e-29	2.88133e-28	Task6	X	FBgn0267383	308.921	6.49538	0.682376	9.51877	1.75e-21	2.67e-20	Ubc87F	X	FBgn0030278	362.509	9.18123	0.665525	13.7955	2.71357e-43	4.27971e-42	CG15200
FBgn0038179	964.937	3.56596	0.316494	11.2671	1.90833e-29	3.01356e-28	CG9312	X	FBgn0032733	282.126	6.12489	0.643564	9.51714	1.78e-21	2.7e-20	CG15170	X	FBgn0038126	865.533	4.50641	0.326671	13.795	2.73218e-43	4.30207e-42	CG8483
FBgn0250845	280.674	7.19872	0.639654	11.2541	2.2111e-29	3.48605e-28	CG1288	X	FBgn0032249	375.56	-6.45931	0.67879	-9.51592	1.8e-21	2.73e-20	TBC1D16	X	FBgn0030494	1221.98	5.10073	0.370194	13.7785	3.43182e-43	5.39499e-42	Cpr12A
FBgn0031012	197.179	5.38515	0.478796	11.2473	2.38823e-29	3.75925e-28	CG8051	X	FBgn0034943	209.606	5.92002	0.622458	9.51071	1.89e-21	2.87e-20	Fmo-1	X	FBgn0262952	17279.7	-4.80854	0.349011	-13.7776	3.47555e-43	5.45493e-42	ND4
FBgn0033289	296.912	5.292	0.471137	11.2324	2.82682e-29	4.44248e-28	CG2121	X	FBgn0033443	352.52	4.98469	0.524287	9.50756	1.95e-21	2.94e-20	CG1698	X	FBgn0036778	352.784	6.86651	0.498491	13.7746	3.6241e-43	5.66979e-42	Cyp312a1
FBgn0031850	575.212	5.39652	0.480541	11.2301	2.90167e-29	4.55278e-28	Tsp	X	FBgn0052591	210.414	6.42789	0.676072	9.50771	1.95e-21	2.94e-20	CG32591	X	FBgn0259716	799.283	6.75586	0.490458	13.7746	3.62386e-43	5.66979e-42	CG42370
FBgn0069969	1404.01	-3.64496	0.324674	-11.2265	3.02105e-29	4.7325e-28	CG40498	X	FBgn0042206	375.566	5.61606	0.591172	9.49986	2.1e-21	3.17e-20	GstD10	X	FBgn0035574	340.321	4.84585	0.35186	13.7721	3.75205e-43	5.86055e-42	RhoGEF64C
FBgn0264894	1856.82	4.12913	0.368098	11.2175	3.34718e-29	5.23499e-28	CG44085	X	FBgn0039380	428.379	-4.23215	0.445795	-9.49347	2.23e-21	3.36e-20	CG5890	X	FBgn0265263	374.394	8.80156	0.639147	13.7708	3.82018e-43	5.9574e-42	CG42688
FBgn0051287	264.926	5.15351	0.459769	11.2089	3.68687e-29	5.75705e-28	CG31287	X	FBgn0036687	234.3	6.55275	0.690299	9.49262	2.25e-21	3.38e-20	CG6652	X	FBgn0085345	279.688	7.23942	0.526283	13.7558	4.70278e-43	7.32204e-42	CG34316
FBgn0034819	529.801	7.38075	0.658694	11.2051	3.84789e-29	5.99891e-28	CG9877	X	FBgn0024232	375.226	-5.92178	0.624602	-9.48087	2.52e-21	3.78e-20	gprs	X	FBgn0035143	271.282	8.15751	0.593447	13.746	5.38394e-43	8.36919e-42	Ppm1
FBgn0004580	1646.39	-3.11346	0.278195	-11.1917	4.47943e-29	6.97236e-28	Cbp53E	X	FBgn0086691	3849.72	4.69613	0.495464	9.47824	2.59e-21	3.87e-20	UK114	X	FBgn0033207	312.056	6.9564	0.50643	13.7362	6.16619e-43	9.56988e-42	CG12826
FBgn0028938	296.763	6.21736	0.556013	11.182	4.99271e-29	7.75895e-28	CG16886	X	FBgn0030929	1371.63	6.35194	0.670718	9.47036	2.79e-21	4.17e-20	CG15043	X	FBgn0001142	6655.13	2.73363	0.199323	13.7146	8.30045e-43	1.28617e-41	Gs1
FBgn0028371	2933.54	4.73148	0.423278	11.1782	5.21482e-29	8.09124e-28	jbug	X	FBgn0042133	190.556	6.799	0.718009	9.46925	2.82e-21	4.21e-20	CG18810	X	FBgn0046297	682.25	10.6864	0.779616	13.7072	9.1909e-43	1.42189e-41	CR9284
FBgn0037035	179.06	6.19902	0.554634	11.1768	5.29834e-29	8.2078e-28	CG10589	X	FBgn0085399	710.206	-3.98379	0.420772	-9.46783	2.86e-21	4.26e-20	CG34370	X	FBgn0032588	299.274	6.1896	0.451648	13.7045	9.54453e-43	1.47425e-41	CG5968
FBgn0016685	16420	-2.75479	0.246807	-11.1617	6.27557e-29	9.70627e-28	Nlp	X	FBgn0034490	379.2	6.86258	0.724915	9.46674	2.89e-21	4.29e-20	CG9864	X	FBgn0031514	659.895	10.6372	0.776295	13.7026	9.80094e-43	1.51146e-41	CG3332
FBgn0265089	300.713	6.10925	0.5482	11.1442	7.64239e-29	1.18016e-27	eIF4E-3	X	FBgn0028857	264.094	6.73566	0.711588	9.46567	2.92e-21	4.33e-20	CG12448	X	FBgn0034659	272.136	7.75373	0.566143	13.6957	1.07707e-42	1.65837e-41	CG4021
FBgn0262601	3574.27	-2.64767	0.237691	-11.1391	8.09087e-29	1.24745e-27	SmB	X	FBgn0030968	1161.1	4.44058	0.469191	9.46433	2.95e-21	4.38e-20	CG7322	X	FBgn0025712	2850.24	-3.81763	0.279173	-13.6748	1.43628e-42	2.20796e-41	CG13920
FBgn0036419	579.897	6.93393	0.623908	11.1137	1.07592e-28	1.65624e-27	CG13482	X	FBgn0262481	271.495	7.31114	0.773283	9.45467	3.24e-21	4.8e-20	CG43071	X	FBgn0063493	840.551	5.19668	0.380209	13.6679	1.57798e-42	2.42198e-41	GstE7
FBgn0260632	680.168	3.98221	0.358696	11.1019	1.22802e-28	1.8874e-27	dl	X	FBgn0035124	207.652	5.85117	0.619082	9.45137	3.34e-21	4.94e-20	ttm2	X	FBgn0022355	11298.5	3.59734	0.263429	13.6558	1.86331e-42	2.85542e-41	Tsf1
FBgn0250819	929.561	4.43886	0.399963	11.0982	1.2804e-28	1.96482e-27	CG33521	X	FBgn0264449	3088.41	-3.67903	0.389499	-9.44553	3.54e-21	5.22e-20	CG43867	X	FBgn0004595	17739.5	-3.434	0.251545	-13.6516	1.97484e-42	3.02157e-41	pros
FBgn0032588	311.539	6.35655	0.573348	11.0867	1.4553e-28	2.22971e-27	CG5968	X	FBgn0033782	370.854	4.94466	0.524495	9.42746	4.2e-21	6.19e-20	sug	X	FBgn0028527	922.677	4.52757	0.331711	13.6491	2.0429e-42	3.1208e-41	CG18507
FBgn0034623	600.042	8.50678	0.767821	11.0791	1.58417e-28	2.42336e-27	CG9822	X	FBgn0036589	1201.15	4.4788	0.475188	9.42531	4.29e-21	6.31e-20	CG13067	X	FBgn0033954	824.574	10.9595	0.80311	13.6464	2.12135e-42	3.23556e-41	CG12860
FBgn0031632	1803.36	-3.04532	0.275064	-11.0713	1.7285e-28	2.63985e-27	CG15628	X	FBgn0037502	267.844	6.18203	0.655984	9.42405	4.34e-21	6.37e-20	wa-cup	X	FBgn0262160	2937.12	2.95907	0.216969	13.6382	2.37341e-42	3.61434e-41	CG9932
FBgn0035089	1741	4.67547	0.42231	11.0712	1.73109e-28	2.63985e-27	Phk-3	X	FBgn0085427	1163.3	3.93194	0.417981	9.40698	5.11e-21	7.49e-20	CG34398	X	FBgn0010246	1017.09	3.83003	0.280889	13.6354	2.46724e-42	3.75136e-41	Myo61F
FBgn0037672	1372.24	4.75985	0.430337	11.0607	1.94465e-28	2.9609e-27	sage	X	FBgn0033872	3230.47	-3.97626	0.422888	-9.40261	5.32e-21	7.79e-20	CG6329	X	FBgn0038466	794.993	10.8912	0.799045	13.6303	2.64426e-42	4.01424e-41	CG8907
FBgn0029708	3394.18	-4.44822	0.40229	-11.0573	2.02177e-28	3.07352e-27	CG3556	X	FBgn0029722	191.582	5.17531	0.551109	9.39072	5.96e-21	8.71e-20	CG7024	X	FBgn0013684	16282.8	-4.79959	0.352392	-13.62	3.044e-42	4.61389e-41	ND5
FBgn0262574	205.265	7.58393	0.68599	11.0555	2.06284e-28	3.13109e-27	CG43114	X	FBgn0035952	212.581	6.14605	0.654556	9.38964	6.02e-21	8.79e-20	CG5280	X	FBgn0030191	366.793	8.7555	0.643786	13.6	4.00335e-42	6.05858e-41	CG15306
FBgn0260400	5301.05	-3.51687	0.318406	-11.0452	2.31142e-28	3.50297e-27	elav	X	FBgn0032770	270.292	7.74614	0.825704	9.38126	6.52e-21	9.5e-20	CG13086	X	FBgn0039494	607.583	4.60915	0.339161	13.5899	4.59908e-42	6.94932e-41	grass
FBgn0042189	1100.73	7.39412	0.66968	11.0413	2.41573e-28	3.65539e-27	CG17376	X	FBgn0027552	4093.05	3.58917	0.382667	9.37934	6.64e-21	9.66e-20	CG10863	X	FBgn0037163	212.835	6.72885	0.495214	13.5878	4.73272e-42	7.14017e-41	laza
FBgn0259213	504.564	-3.99247	0.361961	-11.0301	2.73549e-28	4.13282e-27	CG42313	X	FBgn0031239	384.076	-5.45856	0.581994	-9.37907	6.66e-21	9.67e-20	CG17075	X	FBgn0010114	722.134	-3.36674	0.24788	-13.5821	5.11113e-42	7.69914e-41	hig
FBgn0260440	1418.79	-4.35821	0.395796	-11.0113	3.37209e-28	5.08676e-27	spdo	X	FBgn0039769	245.145	6.76367	0.72122	9.37809	6.72e-21	9.74e-20	CG15534	X	FBgn0051709	352.482	8.88862	0.65448	13.5812	5.17676e-42	7.78594e-41	CG31709
FBgn0031347	345.333	6.52603	0.592818	11.0085	3.47794e-28	5.23834e-27	CG10869	X	FBgn0039801	229.626	6.9819	0.744522	9.37769	6.74e-21	9.77e-20	Npc2h	X	FBgn0036891	566.113	3.98284	0.293325	13.5782	5.39047e-42	8.09486e-41	CG9372
FBgn0039593	446.55	6.82412	0.620386	10.9998	3.83051e-28	5.7605e-27	Sid	X	FBgn0052694	180.503	6.08743	0.649214	9.37661	6.81e-21	9.85e-20	CG32694	X	FBgn0051015	482.7	9.85392	0.725923	13.5743	5.6857e-42	8.52505e-41	PH4alphaPV
FBgn0027580	4247.32	2.9775	0.270912	10.9906	4.23909e-28	6.36515e-27	PCB	X	FBgn0031501	356.791	5.61201	0.59862	9.3749	6.92e-21	1e-19	CG17261	X	FBgn0038311	329.228	4.2656	0.314293	13.572	5.8671e-42	8.7835e-41	CG14864
FBgn0013467	1534.92	-4.34997	0.396031	-10.9839	4.56812e-28	6.84867e-27	igl	X	FBgn0038299	350.364	6.44333	0.687535	9.37165	7.14e-21	1.03e-19	Spn88Eb	X	FBgn0033113	488.817	7.53292	0.555254	13.5666	6.31599e-42	9.441e-41	Spn42Dc
FBgn0033919	3736.78	4.29523	0.391379	10.9746	5.06174e-28	7.5771e-27	CG8547	X	FBgn0040252	347.1	5.13736	0.548203	9.37128	7.17e-21	1.03e-19	Ugt86Dh	X	FBgn0002789	9438.83	6.80236	0.501613	13.561	6.82283e-42	1.0183e-40	Mp20
FBgn0063127	32811.4	-4.89145	0.445895	-10.97	5.32959e-28	7.96587e-27	pncr002:3R	X	FBgn0028856	211.425	5.84139	0.62385	9.36346	7.72e-21	1.11e-19	CG18063	X	FBgn0085273	2022.85	8.56749	0.632106	13.5539	7.51559e-42	1.11997e-40	CG34244
FBgn0038716	1921.74	4.75359	0.433359	10.9692	5.37731e-28	8.02492e-27	CG7342	X	FBgn0038404	358.936	5.9859	0.639973	9.35336	8.49e-21	1.22e-19	CG8925	X	FBgn0032025	1942.69	7.50456	0.553729	13.5528	7.62916e-42	1.13516e-40	CG7778
FBgn0037181	4660.88	4.51982	0.412173	10.9658	5.57755e-28	8.31106e-27	CG11370	X	FBgn0038412	527.705	4.71206	0.503908	9.35103	8.68e-21	1.24e-19	Zip89B	X	FBgn0261575	357.524	6.42306	0.474049	13.5494	7.99304e-42	1.18748e-40	tobi
FBgn0010382	2837.26	-3.25143	0.296742	-10.9571	6.14341e-28	9.1403e-27	CycE	X	FBgn0036550	681.168	4.46624	0.477685	9.34976	8.78e-21	1.26e-19	CG17026	X	FBgn0003430	425.143	-5.2683	0.388988	-13.5436	8.64379e-42	1.28221e-40	slp1
FBgn0039241	5851.57	3.72085	0.33964	10.9553	6.26802e-28	9.31154e-27	CG11089	X	FBgn0033020	275.323	5.60607	0.599821	9.34625	9.08e-21	1.3e-19	COX4L	X	FBgn0031939	740.547	3.6659	0.271549	13.4999	1.56514e-41	2.31817e-40	CG13796
FBgn0052695	752.639	7.43245	0.678759	10.9501	6.63996e-28	9.84911e-27	CG32695	X	FBgn0039051	367.217	6.51272	0.696842	9.34605	9.1e-21	1.3e-19	CG17109	X	FBgn0031632	1634.69	-3.74078	0.27752	-13.4793	2.06986e-41	3.06106e-40	CG15628
FBgn0051029	246.877	5.33797	0.487522	10.9492	6.7045e-28	9.92977e-27	CG31029	X	FBgn0262983	300.029	7.94941	0.850802	9.34343	9.33e-21	1.33e-19	CG43291	X	FBgn0039465	3178.9	-2.55864	0.189988	-13.4673	2.43469e-41	3.59513e-40	Tsp97E
FBgn0038783	178.684	6.41825	0.586401	10.9452	7.01e-28	1.03665e-26	CG4367	X	FBgn0051660	1452.5	-4.0826	0.436964	-9.34312	9.35e-21	1.33e-19	smog	X	FBgn0263979	5605.68	-2.60353	0.193652	-13.4444	3.32219e-41	4.89822e-40	Caf1-55
FBgn0032713	1354.07	3.03314	0.277171	10.9432	7.16226e-28	1.05757e-26	CG17323	X	FBgn0035300	1058.87	4.21472	0.451121	9.34276	9.39e-21	1.33e-19	CG1139	X	FBgn0011259	1911.81	-2.89599	0.215565	-13.4344	3.80039e-41	5.5948e-40	Sema1a
FBgn0032798	508.963	-3.95124	0.361204	-10.9391	7.4951e-28	1.10505e-26	CG10132	X	FBgn0032066	253.603	7.74711	0.832144	9.30981	1.28e-20	1.82e-19	LManIII	X	FBgn0029891	3575.47	2.78009	0.207167	13.4196	4.64421e-41	6.8267e-40	Pink1
FBgn0032549	205.441	7.8878	0.721592	10.9311	8.18423e-28	1.20483e-26	CG4650	X	FBgn0035585	157.029	6.59566	0.708524	9.30902	1.29e-20	1.83e-19	ATPsynCF6L	X	FBgn0033821	955.804	7.35772	0.548518	13.4138	5.01866e-41	7.36601e-40	CG10799
FBgn0038598	621.38	4.04961	0.371129	10.9116	1.01463e-27	1.49142e-26	CG7131	X	FBgn0030926	244.11	7.66832	0.823786	9.30863	1.29e-20	1.83e-19	psh	X	FBgn0028518	1238.63	11.9582	0.891579	13.4124	5.11734e-41	7.49952e-40	CG18480
FBgn0032219	164.43	6.9584	0.638008	10.9065	1.07366e-27	1.57583e-26	CG4995	X	FBgn0260461	427.024	5.18687	0.557283	9.30743	1.31e-20	1.85e-19	Rcd7	X	FBgn0033777	4314.78	3.25363	0.242942	13.3926	6.67746e-41	9.77119e-40	CG17574
FBgn0086913	488.562	-3.85957	0.353957	-10.904	1.10246e-27	1.61568e-26	Rab26	X	FBgn0038257	396.037	4.16306	0.447769	9.29735	1.44e-20	2.03e-19	smp-30	X	FBgn0039678	21751.1	-3.51289	0.262554	-13.3797	7.9474e-41	1.1612e-39	Obp99a
FBgn0036927	5993.75	-4.20239	0.385459	-10.9023	1.12372e-27	1.6419e-26	Gabat	X	FBgn0031294	10079	-3.90952	0.420582	-9.29549	1.47e-20	2.06e-19	IA-2	X	FBgn0031690	289.039	6.86432	0.513327	13.3722	8.7887e-41	1.2822e-39	CG7742
FBgn0045038	2844.26	-3.4139	0.313133	-10.9024	1.12255e-27	1.6419e-26	Proc	X	FBgn0040996	233.407	6.59082	0.709504	9.28933	1.55e-20	2.18e-19	CG12617	X	FBgn0259164	493.359	8.21321	0.614284	13.3704	9.00708e-41	1.31209e-39	CG42269
FBgn0267910	542174	-6.57884	0.603595	-10.8994	1.15976e-27	1.69204e-26	MRE16	X	FBgn0028872	316.103	6.50094	0.700597	9.27914	1.71e-20	2.4e-19	CG18095	X	FBgn0013683	1595.2	-5.29749	0.396248	-13.3691	9.1585e-41	1.33216e-39	ND4L
FBgn0032129	376.02	3.56242	0.326994	10.8945	1.22501e-27	1.78457e-26	jp	X	FBgn0041605	4958.32	-3.5191	0.379696	-9.2682	1.89e-20	2.65e-19	cpx	X	FBgn0042206	298.844	6.69913	0.501235	13.3652	9.6513e-41	1.40174e-39	GstD10
FBgn0086708	766.89	3.03812	0.278915	10.8926	1.25007e-27	1.81837e-26	stv	X	FBgn0050489	178.674	8.50416	0.917584	9.268	1.9e-20	2.65e-19	Cyp12d1-p	X	FBgn0014163	15215.1	-2.72531	0.204233	-13.3441	1.28163e-40	1.85865e-39	fax
FBgn0000640	52552.8	7.56176	0.694396	10.8897	1.29071e-27	1.87192e-26	Fbp2	X	FBgn0037035	271.784	5.68624	0.614162	9.25852	2.07e-20	2.9e-19	CG10589	X	FBgn0037015	448.995	-4.47287	0.335332	-13.3386	1.37988e-40	1.99815e-39	cmpy
FBgn0013685	5293.1	-6.49209	0.596165	-10.8897	1.28999e-27	1.87192e-26	ND6	X	FBgn0050271	204.076	5.23194	0.565251	9.25595	2.12e-20	2.96e-19	CG30271	X	FBgn0030998	268.635	4.70224	0.352734	13.3308	1.53181e-40	2.21487e-39	CG14195
FBgn0031542	420.73	5.60512	0.51542	10.8748	1.51913e-27	2.19992e-26	CG15414	X	FBgn0030763	2058.73	5.29774	0.572567	9.25261	2.19e-20	3.05e-19	CG9782	X	FBgn0014879	5662.05	-2.50495	0.188031	-13.322	1.72357e-40	2.48844e-39	Set
FBgn0004055	1807.7	-3.19985	0.294291	-10.8731	1.54907e-27	2.23997e-26	uzip	X	FBgn0030748	246.339	8.96575	0.96928	9.24991	2.25e-20	3.12e-19	Traf-like	X	FBgn0039152	365.772	4.96098	0.372705	13.3108	2.00434e-40	2.88951e-39	Root
FBgn0032435	187.356	6.53	0.6009	10.867	1.65484e-27	2.38937e-26	Oatp33Eb	X	FBgn0050362	268.795	5.03075	0.543877	9.24978	2.25e-20	3.12e-19	boly	X	FBgn0051287	238.844	5.06308	0.380568	13.304	2.19412e-40	3.15843e-39	CG31287
FBgn0036837	2783.41	3.20129	0.294923	10.8547	1.89525e-27	2.73245e-26	CG18135	X	FBgn0031563	571.129	6.02125	0.650991	9.24937	2.26e-20	3.13e-19	CG10031	X	FBgn0038978	322.681	8.56942	0.645385	13.278	3.10558e-40	4.46386e-39	tHMG1
FBgn0034365	812.251	3.93965	0.362955	10.8544	1.90114e-27	2.73691e-26	CG5335	X	FBgn0029814	1037.18	-5.09517	0.550877	-9.2492	2.26e-20	3.13e-19	CG15765	X	FBgn0036109	949.272	8.47515	0.638756	13.2682	3.53889e-40	5.07919e-39	Cpr67Fa2
FBgn0035496	811.949	6.68452	0.615971	10.852	1.9507e-27	2.80414e-26	CG14990	X	FBgn0034828	218.539	7.03245	0.761201	9.23863	2.5e-20	3.45e-19	CG13545	X	FBgn0034443	4390.76	3.83031	0.288798	13.2629	3.79828e-40	5.44346e-39	cer
FBgn0030396	948.727	3.57385	0.329334	10.8518	1.9564e-27	2.80819e-26	CG2556	X	FBgn0039640	231.847	-6.32296	0.685389	-9.22536	2.83e-20	3.9e-19	CG14516	X	FBgn0032715	2166.92	3.80627	0.287492	13.2396	5.18459e-40	7.4193e-39	CG17597
FBgn0033731	229.813	6.60148	0.608579	10.8474	2.0524e-27	2.94167e-26	Cpr49Ah	X	FBgn0032637	207.649	5.81877	0.631164	9.21912	3e-20	4.13e-19	CG5050	X	FBgn0033285	246.24	6.11205	0.462074	13.2274	6.09315e-40	8.70667e-39	CG18449
FBgn0032187	286.446	5.52262	0.509223	10.8452	2.10169e-27	3.0079e-26	CG4839	X	FBgn0028988	275.193	6.21751	0.674908	9.21237	3.19e-20	4.39e-19	Spn42Dd	X	FBgn0027790	900.164	4.04145	0.305673	13.2215	6.59574e-40	9.41102e-39	GV1
FBgn0004575	1328.47	-3.61237	0.333159	-10.8428	2.15823e-27	3.08432e-26	Syn	X	FBgn0001114	3039.77	4.68783	0.509034	9.20927	3.28e-20	4.51e-19	Glt	X	FBgn0030041	2011.43	7.00455	0.530187	13.2115	7.53377e-40	1.07337e-38	CG12116
FBgn0039498	199.912	6.15338	0.567918	10.835	2.35008e-27	3.35357e-26	CG17991	X	FBgn0037635	639.206	4.99178	0.544098	9.17441	4.54e-20	6.23e-19	CG9837	X	FBgn0262972	37354.4	-4.74745	0.359617	-13.2014	8.61184e-40	1.22517e-38	CR43283
FBgn0040658	356.833	4.66359	0.430541	10.8319	2.42977e-27	3.46224e-26	CG13516	X	FBgn0263117	1595.93	-4.10365	0.447564	-9.16887	4.78e-20	6.55e-19	CG34377	X	FBgn0030300	573.807	6.10447	0.462601	13.196	9.25718e-40	1.31506e-38	Sk1
FBgn0261090	834.381	-5.73766	0.52988	-10.8282	2.53008e-27	3.59993e-26	Sytbeta	X	FBgn0038708	168.936	6.56073	0.715921	9.16403	5e-20	6.84e-19	CG6255	X	FBgn0039685	116539	6.75948	0.512381	13.1923	9.71925e-40	1.37869e-38	Obp99b
FBgn0027790	1029.8	4.63489	0.428531	10.8158	2.89868e-27	4.1184e-26	GV1	X	FBgn0010038	732.541	4.34532	0.47499	9.14824	5.79e-20	7.91e-19	GstD2	X	FBgn0259736	864.075	3.40362	0.258225	13.1808	1.13148e-39	1.60269e-38	CG42390
FBgn0050285	774.118	-3.5454	0.328094	-10.8061	3.22247e-27	4.57179e-26	CG30285	X	FBgn0033285	352.777	5.60908	0.613365	9.14477	5.98e-20	8.15e-19	CG18449	X	FBgn0027585	720.314	4.35779	0.330637	13.18	1.14415e-39	1.61828e-38	CG8740
FBgn0033358	937.944	-3.62615	0.335801	-10.7985	3.49851e-27	4.95622e-26	spab	X	FBgn0039015	463.603	5.71455	0.625558	9.13511	6.53e-20	8.9e-19	Takl2	X	FBgn0010300	13026.1	-2.65726	0.201811	-13.1671	1.35729e-39	1.91695e-38	brat
FBgn0037678	787.671	5.47388	0.507043	10.7957	3.60748e-27	5.10319e-26	CG16749	X	FBgn0035823	234.241	6.56443	0.719048	9.12934	6.89e-20	9.38e-19	eIF4E-5	X	FBgn0264711	499.145	5.49741	0.417616	13.1638	1.41773e-39	1.99942e-38	CG43980
FBgn0001217	415.742	7.58364	0.702742	10.7915	3.77555e-27	5.32796e-26	Hsc70-2	X	FBgn0038716	2773.57	3.87502	0.42451	9.12822	6.96e-20	9.46e-19	CG7342	X	FBgn0037222	262.139	4.96616	0.377716	13.1479	1.75042e-39	2.46503e-38	CG14642
FBgn0024913	695.085	-3.69035	0.34197	-10.7915	3.77726e-27	5.32796e-26	Actbeta	X	FBgn0035325	293.926	6.74229	0.739164	9.12151	7.41e-20	1e-18	CG13806	X	FBgn0030594	1159.6	5.43624	0.41369	13.1408	1.92062e-39	2.7008e-38	CG9509
FBgn0032869	359.982	5.15302	0.477685	10.7875	3.94359e-27	5.55455e-26	CG17470	X	FBgn0028936	687.223	6.35148	0.696733	9.11609	7.79e-20	1.05e-18	NimB5	X	FBgn0030304	1218.37	-4.77365	0.363294	-13.1399	1.94461e-39	2.73059e-38	Cyp4g15
FBgn0032785	1521.45	5.03315	0.466912	10.7796	4.2954e-27	6.04137e-26	CG10026	X	FBgn0051030	3128.39	-4.0769	0.447715	-9.10601	8.55e-20	1.16e-18	CG31030	X	FBgn0038250	1086.9	5.94725	0.453931	13.1017	3.22172e-39	4.51737e-38	CG3505
FBgn0010014	4952.31	-4.46495	0.414336	-10.7762	4.46153e-27	6.26601e-26	CanB	X	FBgn0037448	387.946	5.16179	0.567065	9.10264	8.82e-20	1.19e-18	CG15186	X	FBgn0034394	527.979	6.70652	0.512192	13.0938	3.57506e-39	5.00559e-38	CG15096
FBgn0035679	1425.75	3.62817	0.336768	10.7735	4.59305e-27	6.44148e-26	CG10467	X	FBgn0036262	1165.75	5.74586	0.631414	9.1	9.03e-20	1.22e-18	CG6910	X	FBgn0035359	425.89	7.41349	0.56678	13.08	4.28364e-39	5.98909e-38	CG1143
FBgn0013949	1711.82	3.6099	0.335318	10.7656	5.00222e-27	7.00525e-26	Elal	X	FBgn0051792	167.891	6.51776	0.716452	9.09727	9.26e-20	1.25e-18	CG31792	X	FBgn0041712	349.904	4.67867	0.357953	13.0706	4.84525e-39	6.76459e-38	yellow-d
FBgn0267668	2672.44	-3.20746	0.298467	-10.7464	6.16095e-27	8.61564e-26	CR46006	X	FBgn0028531	177.614	6.80006	0.74764	9.09538	9.43e-20	1.27e-18	CG15286	X	FBgn0035904	3015.57	2.92547	0.22393	13.0642	5.27089e-39	7.34829e-38	GstO3
FBgn0053319	230.956	7.75504	0.722101	10.7395	6.63686e-27	9.2679e-26	CR33319	X	FBgn0033484	4725.65	-4.65569	0.512242	-9.08884	1e-19	1.34e-18	CG2269	X	FBgn0027341	2095.37	4.02912	0.308672	13.0531	6.1028e-39	8.4959e-38	Gfat1
FBgn0019660	8801.36	-4.12767	0.384366	-10.7389	6.68215e-27	9.31783e-26	roX2	X	FBgn0053202	440.893	-4.60654	0.507536	-9.07629	1.12e-19	1.51e-18	dpr11	X	FBgn0267252	9047.64	-3.6326	0.278364	-13.0498	6.37064e-39	8.8561e-38	Ggamma30A
FBgn0046253	355.314	5.21562	0.486031	10.731	7.27757e-27	1.01337e-25	CG3502	X	FBgn0031417	140.852	7.17897	0.791157	9.07402	1.15e-19	1.54e-18	CG3597	X	FBgn0053493	757.899	5.44577	0.417581	13.0412	7.12918e-39	9.89644e-38	CG33493
FBgn0032221	691.458	-3.72323	0.347029	-10.7289	7.44881e-27	1.03573e-25	Schip1	X	FBgn0034837	140.434	6.98331	0.769717	9.07257	1.16e-19	1.55e-18	RpL22-like	X	FBgn0033807	205.486	6.73808	0.517303	13.0254	8.77462e-39	1.21632e-37	AQP
FBgn0037504	1405.25	-2.7528	0.256691	-10.7242	7.83727e-27	1.0882e-25	CG1142	X	FBgn0032741	901.075	-4.28373	0.472425	-9.06755	1.22e-19	1.63e-18	Sidpn	X	FBgn0037936	423.492	7.0175	0.538978	13.02	9.41644e-39	1.30343e-37	CG6908
FBgn0035094	860.103	4.37862	0.40835	10.7227	7.96452e-27	1.1043e-25	CG9380	X	FBgn0267910	230582	-4.88728	0.539404	-9.06052	1.3e-19	1.73e-18	MRE16	X	FBgn0010423	3552.62	6.4575	0.496034	13.0183	9.63518e-39	1.33182e-37	TpnC47D
FBgn0004174	489.411	7.34985	0.685542	10.7212	8.09346e-27	1.12059e-25	Mst84Dc	X	FBgn0036891	563.551	4.05142	0.447394	9.05561	1.36e-19	1.81e-18	CG9372	X	FBgn0036837	4029.61	3.2614	0.250585	13.0152	1.00327e-38	1.38479e-37	CG18135
FBgn0015010	1942.48	6.94239	0.647852	10.716	8.56196e-27	1.18378e-25	Ag5r	X	FBgn0038248	232.384	6.53892	0.722643	9.04861	1.45e-19	1.93e-18	CG7886	X	FBgn0036008	3208.42	-2.7736	0.213241	-13.0069	1.11806e-38	1.54106e-37	CG3408
FBgn0028670	5518.63	3.93899	0.367664	10.7136	8.79191e-27	1.21385e-25	Vha100-2	X	FBgn0035144	314.299	6.13356	0.679331	9.02882	1.74e-19	2.3e-18	Kah	X	FBgn0039742	296.086	4.08869	0.314632	12.9951	1.30373e-38	1.79443e-37	CG15528
FBgn0034075	895.649	4.97727	0.464792	10.7086	9.27559e-27	1.27883e-25	Asph	X	FBgn0040099	4175.97	4.52066	0.500926	9.0246	1.8e-19	2.39e-18	lectin-28C	X	FBgn0035975	557.718	3.87662	0.298764	12.9755	1.68446e-38	2.31518e-37	PGRP-LA
FBgn0036183	186.119	5.79845	0.542528	10.6878	1.16042e-26	1.59763e-25	CG6083	X	FBgn0034883	500.557	4.79276	0.531124	9.02381	1.82e-19	2.41e-18	Eglp2	X	FBgn0053978	1519.13	3.41604	0.264023	12.9384	2.7322e-38	3.74993e-37	CG33978
FBgn0027560	623.167	7.9555	0.744752	10.6821	1.23471e-26	1.69751e-25	Tps1	X	FBgn0260400	5948.45	-3.61532	0.400877	-9.01851	1.91e-19	2.52e-18	elav	X	FBgn0263762	940.472	7.69969	0.596111	12.9165	3.63107e-38	4.97661e-37	CG43679
FBgn0014092	986.239	-2.95183	0.276526	-10.6747	1.33677e-26	1.83524e-25	CG4278	X	FBgn0036927	5099.61	-3.34572	0.371177	-9.01381	1.99e-19	2.63e-18	Gabat	X	FBgn0035679	1661.52	3.20739	0.248782	12.8924	4.97033e-38	6.80258e-37	CG10467
FBgn0033705	206.751	7.41119	0.694572	10.6702	1.40399e-26	1.92482e-25	CG13168	X	FBgn0031697	952.234	-5.81343	0.645434	-9.00701	2.12e-19	2.79e-18	CG14024	X	FBgn0261560	8681.84	3.27427	0.254336	12.8738	6.32375e-38	8.64275e-37	Thor
FBgn0034784	340.208	9.86761	0.925124	10.6663	1.4641e-26	2.00443e-25	CG9826	X	FBgn0033268	53775.8	-5.00007	0.555134	-9.00695	2.12e-19	2.79e-18	Obp44a	X	FBgn0037283	232.009	6.38841	0.496642	12.8632	7.25049e-38	9.89545e-37	CG14658
FBgn0034103	532.667	-5.04044	0.472653	-10.6641	1.49797e-26	2.04792e-25	prim	X	FBgn0030769	723.861	4.69143	0.520966	9.00526	2.15e-19	2.83e-18	CG13012	X	FBgn0034490	429.661	7.03523	0.547536	12.8489	8.72518e-38	1.18914e-36	CG9864
FBgn0051802	230.513	8.26287	0.775067	10.6608	1.55182e-26	2.11858e-25	CG31802	X	FBgn0010246	1107.64	3.88458	0.431466	9.00321	2.19e-19	2.88e-18	Myo61F	X	FBgn0034756	252.153	6.574	0.511905	12.8422	9.50906e-38	1.29416e-36	Cyp6d2
FBgn0031937	592.017	5.90628	0.554558	10.6504	1.73582e-26	2.36648e-25	CG13795	X	FBgn0032525	175.585	5.76886	0.641923	8.98684	2.54e-19	3.34e-18	Hsp60D	X	FBgn0035325	241.274	4.48318	0.349412	12.8307	1.1042e-37	1.5007e-36	CG13806
FBgn0036919	4058.34	3.03444	0.285223	10.6388	1.96575e-26	2.67621e-25	Grasp65	X	FBgn0032685	821.782	6.30317	0.701442	8.98601	2.56e-19	3.36e-18	CG10211	X	FBgn0037934	758.709	7.71324	0.601796	12.817	1.3162e-37	1.78633e-36	CG6830
FBgn0029835	434.509	6.72347	0.632125	10.6363	2.02017e-26	2.74648e-25	CG5921	X	FBgn0037203	1080.7	4.0999	0.456327	8.98458	2.6e-19	3.4e-18	slif	X	FBgn0030396	1256.05	4.35843	0.341089	12.778	2.17658e-37	2.94991e-36	CG2556
FBgn0051183	346.624	5.48261	0.515548	10.6345	2.05844e-26	2.79462e-25	CG31183	X	FBgn0035003	206.265	5.45185	0.607499	8.97425	2.85e-19	3.72e-18	CG15873	X	FBgn0035976	794.655	4.71433	0.369064	12.7737	2.29827e-37	3.11049e-36	PGRP-LC
FBgn0040371	272.062	5.87511	0.55258	10.6322	2.11168e-26	2.86292e-25	CG12470	X	FBgn0266223	210.762	6.77654	0.755672	8.96756	3.03e-19	3.95e-18	CR44918	X	FBgn0029835	427.603	7.63156	0.598224	12.757	2.84853e-37	3.84987e-36	CG5921
FBgn0004513	1541.18	-4.28966	0.403622	-10.6279	2.21005e-26	2.99214e-25	Mdr65	X	FBgn0030156	179.848	6.97729	0.77816	8.96639	3.06e-19	3.99e-18	CG15247	X	FBgn0027570	1944.44	5.26251	0.412774	12.7491	3.15212e-37	4.25427e-36	Nep2
FBgn0035043	246.054	8.27615	0.778883	10.6257	2.26415e-26	3.06115e-25	CG4781	X	FBgn0262788	340.316	8.10188	0.90412	8.96108	3.22e-19	4.18e-18	CG43169	X	FBgn0260653	4688.59	3.66079	0.28766	12.7261	4.23652e-37	5.70991e-36	serp
FBgn0041707	3918.92	-3.39526	0.319654	-10.6217	2.36293e-26	3.19028e-25	7B2	X	FBgn0039742	434.318	4.26867	0.477692	8.93604	4.03e-19	5.24e-18	CG15528	X	FBgn0013949	1875.31	3.9662	0.311671	12.7256	4.26184e-37	5.73609e-36	Elal
FBgn0036529	182.952	5.9548	0.561219	10.6105	2.66388e-26	3.59164e-25	pgant8	X	FBgn0031306	1970.15	-3.85301	0.431194	-8.93569	4.05e-19	5.25e-18	CG4577	X	FBgn0267668	2307.06	-3.18774	0.250707	-12.715	4.88305e-37	6.56311e-36	CR46006
FBgn0034440	341.804	8.25543	0.778431	10.6052	2.81803e-26	3.79424e-25	CG10073	X	FBgn0030597	171.343	6.36874	0.71304	8.93182	4.19e-19	5.43e-18	Eo	X	FBgn0016715	1363.45	6.49141	0.510644	12.7122	5.05878e-37	6.78993e-36	Reg-2
FBgn0050105	747.129	-3.4123	0.321851	-10.6021	2.91303e-26	3.91677e-25	CG30105	X	FBgn0261565	3542.32	3.39365	0.38009	8.92853	4.32e-19	5.58e-18	Lmpt	X	FBgn0030748	244.016	8.3559	0.657502	12.7085	5.30138e-37	7.10575e-36	Traf-like
FBgn0034127	165.848	7.26203	0.685345	10.5962	3.10427e-26	4.16816e-25	CG7848	X	FBgn0029659	275.397	6.66914	0.747683	8.91973	4.67e-19	6.04e-18	CG16782	X	FBgn0038225	319.972	6.99528	0.550712	12.7023	5.74446e-37	7.68904e-36	soti
FBgn0037121	1565.7	-2.91827	0.275558	-10.5904	3.30202e-26	4.42761e-25	Rpb8	X	FBgn0034904	205.405	6.97182	0.781644	8.91943	4.69e-19	6.04e-18	CG15800	X	FBgn0032021	4610.09	-4.62441	0.36407	-12.702	5.76397e-37	7.70456e-36	CG7781
FBgn0261341	5649.29	3.57068	0.338518	10.548	5.19004e-26	6.94967e-25	verm	X	FBgn0035477	283.597	-6.27946	0.704479	-8.91363	4.94e-19	6.36e-18	CG14982	X	FBgn0031322	952.796	3.42556	0.269925	12.6908	6.65392e-37	8.88194e-36	CG5001
FBgn0027556	4177.78	5.98202	0.567175	10.547	5.24207e-26	7.00974e-25	CG4928	X	FBgn0032129	780.001	4.36208	0.489381	8.91347	4.95e-19	6.36e-18	jp	X	FBgn0051639	363.186	9.44132	0.744198	12.6866	7.01865e-37	9.35595e-36	CG31639
FBgn0031585	360.695	9.94768	0.943801	10.54	5.64855e-26	7.53268e-25	CG2955	X	FBgn0037534	1164.74	5.00466	0.561483	8.9133	4.95e-19	6.36e-18	CG2781	X	FBgn0031914	1081.15	3.47382	0.273882	12.6837	7.28584e-37	9.69883e-36	CG5973
FBgn0050463	2383.39	3.45666	0.327954	10.5401	5.64499e-26	7.53268e-25	CG30463	X	FBgn0267252	12657.8	-3.15794	0.35451	-8.90789	5.2e-19	6.67e-18	Ggamma30A	X	FBgn0004396	3426.02	3.45545	0.273038	12.6556	1.04242e-36	1.38577e-35	CrebA
FBgn0037370	3539.3	2.95226	0.280109	10.5397	5.669e-26	7.54966e-25	CG1236	X	FBgn0037107	1103.89	-5.10185	0.573851	-8.89053	6.08e-19	7.79e-18	CG7166	X	FBgn0031306	1794.12	-3.55845	0.281582	-12.6373	1.31423e-36	1.74472e-35	CG4577
FBgn0038009	6503.36	7.43282	0.705798	10.5311	6.21135e-26	8.26067e-25	CG17738	X	FBgn0034647	410.594	4.00377	0.450999	8.87755	6.84e-19	8.74e-18	pirk	X	FBgn0040281	1571.05	-3.57775	0.283263	-12.6305	1.43324e-36	1.90011e-35	Aplip1
FBgn0040503	170.079	7.06853	0.671263	10.5302	6.27102e-26	8.3287e-25	CG7763	X	FBgn0035398	773.213	4.84543	0.54616	8.87182	7.2e-19	9.19e-18	Cht7	X	FBgn0052373	239.677	5.39522	0.427363	12.6244	1.54845e-36	2.05007e-35	CG32373
FBgn0283437	2803.16	5.24414	0.498698	10.5157	7.31647e-26	9.704e-25	PPO1	X	FBgn0051997	12635.5	4.70656	0.530652	8.86939	7.35e-19	9.38e-18	CG31997	X	FBgn0015575	561.065	4.61241	0.365713	12.6121	1.81108e-36	2.39451e-35	alpha-Est7
FBgn0039872	591.14	6.13751	0.583673	10.5153	7.3427e-26	9.72559e-25	salt	X	FBgn0022355	12007.2	4.32282	0.487633	8.8649	7.66e-19	9.75e-18	Tsf1	X	FBgn0050414	510.092	4.58214	0.363536	12.6044	1.99785e-36	2.63786e-35	CG30414
FBgn0013753	2520.07	-2.98189	0.283847	-10.5053	8.16772e-26	1.08037e-24	Bgb	X	FBgn0035246	11569	-4.0015	0.451766	-8.85746	8.19e-19	1.04e-17	CG13928	X	FBgn0001227	604.327	-3.59711	0.285471	-12.6006	2.09531e-36	2.7628e-35	Hsp67Ba
FBgn0041789	5119.57	3.18221	0.302985	10.5028	8.3811e-26	1.1071e-24	Pax	X	FBgn0015575	616.821	5.23228	0.590896	8.85483	8.38e-19	1.06e-17	alpha-Est7	X	FBgn0259794	263.75	8.16375	0.648155	12.5954	2.23931e-36	2.94868e-35	sinah
FBgn0039155	748.827	4.22279	0.402666	10.4871	9.90288e-26	1.30635e-24	Kal1	X	FBgn0038165	1515.3	-4.70849	0.531749	-8.85471	8.39e-19	1.06e-17	Task6	X	FBgn0033872	2608.63	-4.80852	0.381848	-12.5928	2.31412e-36	3.04307e-35	CG6329
FBgn0050414	607.765	4.01303	0.382793	10.4836	1.02807e-25	1.35437e-24	CG30414	X	FBgn0010397	1939.75	4.31811	0.487754	8.85305	8.52e-19	1.08e-17	LamC	X	FBgn0050022	1232.58	2.67741	0.212677	12.5891	2.42432e-36	3.18368e-35	CG30022
FBgn0038246	501.849	-3.57429	0.34121	-10.4753	1.12124e-25	1.47511e-24	CG14853	X	FBgn0038596	1163.62	-4.8292	0.545555	-8.85192	8.6e-19	1.09e-17	CG14312	X	FBgn0036926	3472.83	-4.39064	0.34883	-12.5868	2.49679e-36	3.27443e-35	CG7646
FBgn0040732	3905.8	7.79688	0.744335	10.475	1.12575e-25	1.47906e-24	CG16926	X	FBgn0040565	68800.8	13.6279	1.54124	8.84218	9.39e-19	1.19e-17	CG7606	X	FBgn0062961	296.291	5.75659	0.457808	12.5743	2.92542e-36	3.83139e-35	pncr016:2R
FBgn0033960	537.53	-4.05827	0.387924	-10.4615	1.29789e-25	1.70294e-24	CG10151	X	FBgn0029657	305.15	5.11828	0.579336	8.83473	1e-18	1.27e-17	CG12535	X	FBgn0031478	2511.76	2.74426	0.218325	12.5696	3.1021e-36	4.05733e-35	CG8814
FBgn0013678	115702	-3.64319	0.348387	-10.4573	1.35622e-25	1.77708e-24	CYTB	X	FBgn0085446	7126.19	3.51168	0.397851	8.82664	1.08e-18	1.36e-17	CG34417	X	FBgn0033705	264.026	6.11541	0.487095	12.5548	3.73903e-36	4.88382e-35	CG13168
FBgn0037973	773.232	3.05861	0.29257	10.4543	1.40034e-25	1.83244e-24	CG18547	X	FBgn0050090	264.533	4.91097	0.557567	8.80785	1.28e-18	1.61e-17	CG30090	X	FBgn0013467	1613.35	-4.18559	0.333443	-12.5526	3.84451e-36	5.01487e-35	igl
FBgn0038353	2157.19	7.71299	0.738454	10.4448	1.54823e-25	2.02325e-24	CG5399	X	FBgn0264086	461.689	4.98066	0.566169	8.79712	1.4e-18	1.76e-17	CG43755	X	FBgn0002567	903.581	4.23194	0.337336	12.5452	4.22514e-36	5.50399e-35	Rab32
FBgn0010504	977.564	3.10119	0.296995	10.4419	1.59606e-25	2.08298e-24	kermit	X	FBgn0046875	386.862	4.90566	0.558463	8.78422	1.57e-18	1.98e-17	Obp83g	X	FBgn0031865	1260.13	6.61159	0.527028	12.5451	4.23109e-36	5.50437e-35	Nha1
FBgn0011705	3450.62	-3.28225	0.314492	-10.4367	1.68619e-25	2.19767e-24	rost	X	FBgn0035767	1748.74	3.3047	0.376386	8.78009	1.63e-18	2.04e-17	CG8596	X	FBgn0036890	1615.13	-5.05661	0.403225	-12.5404	4.4857e-36	5.82781e-35	CG9368
FBgn0028379	174.74	5.55756	0.532895	10.429	1.82777e-25	2.37903e-24	fan	X	FBgn0039494	810.108	4.31746	0.491729	8.78017	1.63e-18	2.04e-17	grass	X	FBgn0037181	5992.51	3.79648	0.302791	12.5383	4.60881e-36	5.97978e-35	CG11370
FBgn0050430	544.825	7.42172	0.711858	10.4259	1.88956e-25	2.45291e-24	CG30430	X	FBgn0039886	731.019	4.26588	0.486375	8.77077	1.77e-18	2.22e-17	CG2003	X	FBgn0031850	567.136	4.55616	0.36349	12.5345	4.83471e-36	6.26452e-35	Tsp
FBgn0038706	194.778	8.31896	0.798325	10.4205	1.99863e-25	2.59106e-24	CG3517	X	FBgn0031089	1556.71	5.76106	0.657224	8.76574	1.86e-18	2.32e-17	CG9572	X	FBgn0035094	827.275	4.17572	0.333192	12.5324	4.96065e-36	6.41916e-35	CG9380
FBgn0051221	3122.48	-3.93137	0.377656	-10.4099	2.23411e-25	2.89251e-24	CG31221	X	FBgn0051374	749.241	3.72326	0.424806	8.76462	1.87e-18	2.34e-17	sals	X	FBgn0024183	3934.86	-2.35393	0.187895	-12.5279	5.2559e-36	6.79219e-35	vig
FBgn0086907	164.843	6.39843	0.614762	10.408	2.28022e-25	2.94831e-24	Cyt-c-d	X	FBgn0036075	243.479	6.21716	0.710055	8.75589	2.02e-18	2.52e-17	CG8065	X	FBgn0051374	766.902	3.95588	0.316009	12.5182	5.93387e-36	7.65815e-35	sals
FBgn0011305	6546.23	-2.39124	0.229764	-10.4073	2.29546e-25	2.96408e-24	Rsf1	X	FBgn0035677	1311.97	-4.28151	0.489252	-8.75114	2.11e-18	2.63e-17	CG13293	X	FBgn0027491	1396.4	-3.62139	0.289301	-12.5177	5.97149e-36	7.69649e-35	Cdk5alpha
FBgn0031055	256.426	6.03151	0.580049	10.3983	2.52487e-25	3.25602e-24	et	X	FBgn0029821	451.089	5.05943	0.578285	8.74903	2.15e-18	2.67e-17	CG4020	X	FBgn0021776	2016.42	-4.08341	0.326325	-12.5133	6.31184e-36	8.1244e-35	mira
FBgn0029752	747.635	5.32366	0.512051	10.3967	2.56538e-25	3.3039e-24	TrxT	X	FBgn0039332	2235.12	-4.55555	0.520905	-8.74546	2.22e-18	2.75e-17	alrm	X	FBgn0039008	243.87	4.86931	0.389421	12.504	7.10227e-36	9.12975e-35	CG6972
FBgn0038484	308.04	9.72122	0.937027	10.3745	3.23782e-25	4.16443e-24	CG5246	X	FBgn0010240	583.711	-5.00446	0.5725	-8.74142	2.3e-18	2.85e-17	Lcch3	X	FBgn0035719	506.589	-3.44895	0.276345	-12.4806	9.5264e-36	1.22297e-34	tow
FBgn0033294	330.586	4.89755	0.472403	10.3673	3.49162e-25	4.48497e-24	Mal-A4	X	FBgn0039498	295.998	5.70359	0.652632	8.73937	2.34e-18	2.9e-17	CG17991	X	FBgn0031522	274.692	8.57772	0.687919	12.4691	1.10064e-35	1.41112e-34	CG3285
FBgn0031813	1241.17	2.9984	0.289747	10.3483	4.25802e-25	5.46223e-24	CG9527	X	FBgn0019985	549.296	-5.5963	0.640521	-8.7371	2.39e-18	2.95e-17	mGluR	X	FBgn0259236	704.776	5.7005	0.457299	12.4656	1.14996e-35	1.47241e-34	comm3
FBgn0029915	1784.27	-2.86943	0.277392	-10.3443	4.44102e-25	5.68952e-24	CG14434	X	FBgn0063368	857.624	-4.70844	0.539644	-8.72508	2.66e-18	3.28e-17	Gpb5	X	FBgn0003720	891.895	-3.34901	0.268786	-12.4598	1.23738e-35	1.58226e-34	tll
FBgn0052450	241.761	6.17843	0.597891	10.3337	4.96082e-25	6.34712e-24	CG32450	X	FBgn0020372	1115.01	-3.86305	0.443063	-8.71898	2.81e-18	3.46e-17	TM4SF	X	FBgn0032124	187.618	5.70503	0.458229	12.4502	1.39562e-35	1.78225e-34	CG17855
FBgn0033887	282.875	8.4541	0.818164	10.333	4.99645e-25	6.38435e-24	St4	X	FBgn0038700	152.76	7.3806	0.846661	8.7173	2.85e-18	3.51e-17	CG3734	X	FBgn0028554	2039.41	-2.86725	0.230316	-12.4492	1.41263e-35	1.80161e-34	x16
FBgn0039473	446.383	8.11431	0.785318	10.3325	5.02298e-25	6.40987e-24	CG17191	X	FBgn0020416	323.063	6.11433	0.701476	8.71638	2.87e-18	3.53e-17	Idgf1	X	FBgn0034479	205.079	5.39226	0.433312	12.4443	1.50174e-35	1.91276e-34	CG8654
FBgn0024244	720.258	3.65816	0.354167	10.3289	5.21513e-25	6.6464e-24	drm	X	FBgn0039071	182.069	6.31007	0.724646	8.70781	3.1e-18	3.8e-17	CG4434	X	FBgn0043806	2849.41	-3.05452	0.245558	-12.4391	1.6035e-35	2.03703e-34	CG32032
FBgn0036787	1082.06	6.2244	0.602756	10.3266	5.34385e-25	6.80158e-24	CG4306	X	FBgn0039251	268.344	4.95023	0.568526	8.70714	3.12e-18	3.82e-17	Trf4-2	X	FBgn0051076	2761.45	4.94527	0.398154	12.4205	2.02319e-35	2.56684e-34	CG31076
FBgn0261113	6734.16	2.50966	0.24317	10.3206	5.68592e-25	7.22755e-24	Xrp1	X	FBgn0033942	2490.6	3.839	0.441225	8.70079	3.3e-18	4.03e-17	Cpr51A	X	FBgn0035798	233.649	8.54409	0.688006	12.4186	2.07089e-35	2.62394e-34	frac
FBgn0051386	519.8	-6.37367	0.617859	-10.3157	5.98203e-25	7.59407e-24	CR31386	X	FBgn0035544	369.206	5.41368	0.622358	8.69866	3.36e-18	4.11e-17	CG15021	X	FBgn0046689	269.147	5.1804	0.417367	12.4121	2.24689e-35	2.84324e-34	Takl1
FBgn0032886	1425.02	-4.00235	0.388128	-10.3119	6.22341e-25	7.89025e-24	CG9328	X	FBgn0034221	550.773	4.89631	0.563008	8.6967	3.42e-18	4.17e-17	CG10764	X	FBgn0261509	833.871	3.25968	0.262703	12.4082	2.35818e-35	2.98019e-34	haf
FBgn0262483	1216.08	-4.57093	0.443849	-10.2984	7.16479e-25	9.072e-24	Rbp	X	FBgn0033112	148.297	6.43992	0.740973	8.69116	3.59e-18	4.37e-17	Spn42Db	X	FBgn0037592	4471.42	3.69794	0.298319	12.396	2.74845e-35	3.4689e-34	CG11737
FBgn0261933	2635.85	-2.65765	0.258254	-10.2908	7.7518e-25	9.80256e-24	SmD1	X	FBgn0004513	1757.2	-4.91584	0.565891	-8.6869	3.72e-18	4.54e-17	Mdr65	X	FBgn0037721	424.958	4.32795	0.350047	12.3639	4.09789e-35	5.16536e-34	CG9427
FBgn0085317	385.406	5.57786	0.542261	10.2863	8.12343e-25	1.02592e-23	CG34288	X	FBgn0030614	183.075	7.06856	0.81419	8.68171	3.9e-18	4.74e-17	CG9072	X	FBgn0032946	7513.93	-4.15491	0.336158	-12.36	4.30249e-35	5.41623e-34	nrv3
FBgn0040382	4684.16	2.54133	0.247233	10.2791	8.75241e-25	1.10393e-23	CG5273	X	FBgn0053319	135.149	7.08713	0.81698	8.67479	4.14e-18	5.03e-17	CR33319	X	FBgn0085391	1815.32	-3.77108	0.305252	-12.354	4.63495e-35	5.82722e-34	trv
FBgn0010246	1051.66	4.45171	0.433138	10.2778	8.87173e-25	1.11754e-23	Myo61F	X	FBgn0036926	5174.22	-3.57643	0.412453	-8.67111	4.28e-18	5.19e-17	CG7646	X	FBgn0047135	24908.6	2.74838	0.222484	12.3532	4.68351e-35	5.88068e-34	CG32276
FBgn0260653	4009.93	3.93137	0.382566	10.2763	9.01066e-25	1.13358e-23	serp	X	FBgn0053093	180.142	6.24293	0.720413	8.66576	4.49e-18	5.43e-17	CG33093	X	FBgn0053527	469.984	-4.29565	0.347961	-12.3452	5.16959e-35	6.48264e-34	SIFa
FBgn0038079	956.918	4.33636	0.422143	10.2722	9.39946e-25	1.18097e-23	NijC	X	FBgn0264789	428.792	5.29756	0.612151	8.65401	4.97e-18	6.02e-17	CR44019	X	FBgn0034612	411.919	7.91935	0.641557	12.344	5.25127e-35	6.57659e-34	CG10505
FBgn0031240	213.339	4.85765	0.473488	10.2593	1.07485e-24	1.34837e-23	CG3345	X	FBgn0046689	205.846	4.66028	0.539391	8.63988	5.63e-18	6.8e-17	Takl1	X	FBgn0028560	289.238	8.4666	0.685966	12.3426	5.34127e-35	6.68071e-34	sut4
FBgn0039283	766.882	-3.26028	0.317791	-10.2592	1.07593e-24	1.34837e-23	danr	X	FBgn0036029	198.512	5.30736	0.614686	8.63426	5.91e-18	7.13e-17	CG16719	X	FBgn0004839	2342.51	-2.98573	0.242018	-12.3368	5.73771e-35	7.16735e-34	otk
FBgn0034920	403.413	6.45088	0.628817	10.2588	1.08087e-24	1.35282e-23	CG5597	X	FBgn0038179	1708	3.97488	0.460442	8.63274	5.99e-18	7.22e-17	CG9312	X	FBgn0052499	1179	3.80762	0.308882	12.3271	6.47241e-35	8.07475e-34	Cda4
FBgn0030769	433.475	3.73312	0.363969	10.2567	1.1043e-24	1.38038e-23	CG13012	X	FBgn0035571	349.04	4.21026	0.488498	8.61877	6.77e-18	8.15e-17	CG12493	X	FBgn0050360	1011.44	8.68595	0.705583	12.3103	7.97122e-35	9.93188e-34	Mal-A6
FBgn0038045	382.587	-8.31303	0.810859	-10.2521	1.15778e-24	1.44538e-23	NANS	X	FBgn0002570	188.123	6.90469	0.801592	8.61371	7.07e-18	8.5e-17	Mal-A1	X	FBgn0030306	9447.61	2.73844	0.22249	12.3081	8.1905e-35	1.0192e-33	Spase25
FBgn0261262	1936.33	-5.18918	0.50631	-10.249	1.19569e-24	1.4908e-23	CG42613	X	FBgn0264543	259.7	7.15352	0.830525	8.61325	7.1e-18	8.53e-17	CG43922	X	FBgn0030658	4733.63	3.25227	0.264757	12.284	1.10394e-34	1.37196e-33	CG7872
FBgn0033942	1736.21	3.11006	0.304114	10.2266	1.50713e-24	1.87671e-23	Cpr51A	X	FBgn0051769	170.331	6.88739	0.80011	8.60806	7.43e-18	8.91e-17	CG31769	X	FBgn0035358	216.063	5.23211	0.426169	12.2771	1.20241e-34	1.49243e-33	CG14949
FBgn0001142	4930.83	2.71501	0.265596	10.2223	1.5751e-24	1.95885e-23	Gs1	X	FBgn0033287	605.601	4.37978	0.508811	8.60787	7.44e-18	8.91e-17	CG8701	X	FBgn0032161	910.466	3.05975	0.249291	12.2738	1.25209e-34	1.55212e-33	CG4594
FBgn0038846	1017.96	8.14951	0.797342	10.2208	1.59935e-24	1.98648e-23	CG5697	X	FBgn0029817	142.431	7.83167	0.91015	8.60482	7.64e-18	9.14e-17	CG15764	X	FBgn0037203	846.662	3.86688	0.315343	12.2625	1.44052e-34	1.78343e-33	slif
FBgn0033710	548.388	-3.20833	0.314074	-10.2152	1.69517e-24	2.10283e-23	CG17739	X	FBgn0034688	2798.25	4.27122	0.496836	8.59684	8.19e-18	9.79e-17	CG11474	X	FBgn0031879	1733.87	2.34855	0.191535	12.2618	1.45324e-34	1.79688e-33	uif
FBgn0033742	515.016	5.15133	0.50434	10.214	1.71615e-24	2.12615e-23	CG8550	X	FBgn0003377	170433	12.8249	1.49228	8.59418	8.39e-18	1e-16	Sgs7	X	FBgn0053200	828.654	-5.18573	0.423617	-12.2416	1.8641e-34	2.30197e-33	VepD
FBgn0051451	2638.71	-4.52787	0.443452	-10.2105	1.77926e-24	2.20156e-23	CR31451	X	FBgn0032483	155.595	7.46017	0.868636	8.58838	8.82e-18	1.05e-16	CG15482	X	FBgn0052082	330.603	3.92816	0.320944	12.2394	1.91457e-34	2.3613e-33	IRSp53
FBgn0014031	1137.87	7.33163	0.718353	10.2062	1.86075e-24	2.29948e-23	Spat	X	FBgn0036272	2187.48	-3.61724	0.421173	-8.58849	8.81e-18	1.05e-16	CG4300	X	FBgn0039190	243.677	7.95174	0.65082	12.218	2.4905e-34	3.06773e-33	CG5762
FBgn0013433	710.698	-3.55158	0.348024	-10.205	1.8837e-24	2.32489e-23	beat-Ia	X	FBgn0033170	1035.18	3.43636	0.400248	8.58556	9.04e-18	1.07e-16	sPLA2	X	FBgn0031128	170.251	6.03397	0.49439	12.2049	2.92749e-34	3.60144e-33	hydra
FBgn0052351	965.103	7.84482	0.768897	10.2027	1.92846e-24	2.37713e-23	S-Lap2	X	FBgn0046878	143.031	7.35963	0.85965	8.5612	1.12e-17	1.33e-16	Obp83cd	X	FBgn0011305	4865.87	-2.16789	0.177987	-12.18	3.97151e-34	4.87964e-33	Rsf1
FBgn0034739	227.678	7.44231	0.729964	10.1955	2.07769e-24	2.55786e-23	CG3927	X	FBgn0030566	128.956	7.2421	0.846036	8.56003	1.13e-17	1.34e-16	betaNACtes4	X	FBgn0035003	191.828	5.48742	0.451028	12.1665	4.68938e-34	5.7544e-33	CG15873
FBgn0028875	866.188	-4.6438	0.455557	-10.1937	2.11617e-24	2.60196e-23	nAChRalpha5	X	FBgn0035569	226.696	6.77667	0.791778	8.55881	1.14e-17	1.35e-16	CG15876	X	FBgn0015609	2253.75	-3.04156	0.250555	-12.1393	6.54007e-34	8.01529e-33	CadN
FBgn0031453	36366.5	-2.7127	0.266236	-10.1891	2.21875e-24	2.72466e-23	Bacc	X	FBgn0052170	256.074	4.51756	0.528437	8.54891	1.24e-17	1.47e-16	CG32170	X	FBgn0036919	3721.32	2.44436	0.201718	12.1177	8.51048e-34	1.0404e-32	Grasp65
FBgn0038681	1149.77	3.72781	0.365937	10.187	2.26603e-24	2.77923e-23	Cyp12a4	X	FBgn0037714	170.425	8.84287	1.03451	8.54786	1.25e-17	1.48e-16	CG9396	X	FBgn0035780	570.646	4.48174	0.370091	12.1098	9.36874e-34	1.14388e-32	CG18417
FBgn0039064	1387.5	-4.70235	0.461626	-10.1865	2.27857e-24	2.7911e-23	CG4467	X	FBgn0262721	219.509	7.91789	0.926931	8.54205	1.32e-17	1.56e-16	CG43165	X	FBgn0031585	318.99	8.77346	0.724978	12.1017	1.03473e-33	1.26177e-32	CG2955
FBgn0030158	12990.7	-3.41521	0.335596	-10.1765	2.52377e-24	3.08759e-23	CG9686	X	FBgn0038839	1290.3	-3.56727	0.417781	-8.53861	1.36e-17	1.6e-16	Ktl	X	FBgn0038492	371.086	7.21801	0.59659	12.0988	1.07211e-33	1.30572e-32	Mur89F
FBgn0052026	190.954	5.36001	0.526846	10.1738	2.59693e-24	3.17312e-23	CG32026	X	FBgn0052971	148.094	6.18147	0.724104	8.53672	1.38e-17	1.62e-16	CG32971	X	FBgn0028993	3520.88	-4.8	0.396956	-12.092	1.16388e-33	1.41572e-32	scro
FBgn0260964	2088.14	-2.82303	0.27754	-10.1716	2.65451e-24	3.23943e-23	Vmat	X	FBgn0032187	393.652	4.30466	0.50466	8.52981	1.47e-17	1.72e-16	CG4839	X	FBgn0046332	211.598	6.87086	0.569721	12.06	1.71684e-33	2.08572e-32	gskt
FBgn0031294	12557.3	-3.82476	0.376688	-10.1537	3.19135e-24	3.88971e-23	IA-2	X	FBgn0032291	209.823	5.21056	0.611276	8.52406	1.54e-17	1.81e-16	CG17118	X	FBgn0037913	18048.1	-2.75796	0.228689	-12.0599	1.72088e-33	2.08801e-32	fabp
FBgn0015808	2806.53	2.57418	0.253611	10.1501	3.30936e-24	4.02852e-23	ScpX	X	FBgn0259150	1022.46	-4.25621	0.499422	-8.52227	1.56e-17	1.83e-16	CG42265	X	FBgn0041707	2447.24	-3.32453	0.275731	-12.0571	1.77847e-33	2.1552e-32	7B2
FBgn0005655	6422.45	-2.79254	0.275135	-10.1497	3.32442e-24	4.04182e-23	PCNA	X	FBgn0032124	282.298	5.9233	0.695157	8.52081	1.58e-17	1.86e-16	CG17855	X	FBgn0259707	999.339	-4.4705	0.37091	-12.0528	1.875e-33	2.26936e-32	CG42361
FBgn0032161	889.785	3.44486	0.339438	10.1487	3.35789e-24	4.07744e-23	CG4594	X	FBgn0036108	190.792	9.00641	1.05713	8.51968	1.6e-17	1.87e-16	Cpr67Fa1	X	FBgn0037176	214.206	6.73721	0.559028	12.0517	1.90065e-33	2.29755e-32	CG14456
FBgn0030508	461.724	-3.98288	0.392553	-10.1461	3.44938e-24	4.18334e-23	CG15760	X	FBgn0051231	135.331	7.44175	0.873647	8.51803	1.62e-17	1.9e-16	CG31231	X	FBgn0259749	3363.54	2.64045	0.219378	12.0361	2.29605e-33	2.77206e-32	mmy
FBgn0262579	1223.05	2.59443	0.255717	10.1457	3.46248e-24	4.19402e-23	Ect4	X	FBgn0037850	276.924	4.34654	0.510757	8.51	1.74e-17	2.03e-16	CG14695	X	FBgn0020300	508.706	4.38873	0.364654	12.0353	2.31734e-33	2.79431e-32	geko
FBgn0032715	1385.04	3.68793	0.363689	10.1404	3.65774e-24	4.42505e-23	CG17597	X	FBgn0027376	212.414	5.31753	0.625942	8.49523	1.98e-17	2.3e-16	rha	X	FBgn0260006	422.95	4.18846	0.348086	12.0328	2.38832e-33	2.87633e-32	drd
FBgn0029814	665.17	-3.08197	0.304587	-10.1185	4.57206e-24	5.52434e-23	CG15765	X	FBgn0033289	392.186	5.12535	0.603637	8.49078	2.05e-17	2.39e-16	CG2121	X	FBgn0029708	2308.86	-4.66933	0.388182	-12.0287	2.50978e-33	3.01887e-32	CG3556
FBgn0035193	191.05	6.05539	0.599157	10.1065	5.16839e-24	6.23717e-23	CG9192	X	FBgn0262996	178.189	6.95424	0.819459	8.48637	2.13e-17	2.48e-16	CR43304	X	FBgn0050047	433.454	7.00905	0.583047	12.0214	2.74188e-33	3.29397e-32	CG30047
FBgn0029659	174.992	6.55182	0.648327	10.1057	5.21036e-24	6.28006e-23	CG16782	X	FBgn0026268	294.805	6.61537	0.779809	8.48332	2.19e-17	2.54e-16	antdh	X	FBgn0026439	2517.08	-2.9943	0.249271	-12.0122	3.06513e-33	3.67778e-32	Eaat1
FBgn0039332	3275.66	-4.95609	0.490529	-10.1035	5.32792e-24	6.41384e-23	alrm	X	FBgn0085261	4769.51	4.34098	0.511799	8.4818	2.22e-17	2.57e-16	CG34232	X	FBgn0036165	5211.45	-2.31721	0.192921	-12.0112	3.10287e-33	3.71847e-32	chrb
FBgn0265575	790.33	3.42904	0.339509	10.1	5.52377e-24	6.64143e-23	yin	X	FBgn0037310	282	5.65152	0.666669	8.47725	2.31e-17	2.67e-16	Tim17b1	X	FBgn0039480	338.402	5.97617	0.497608	12.0098	3.15617e-33	3.7777e-32	Cpr97Ea
FBgn0042119	216.198	6.54068	0.648219	10.0902	6.10218e-24	7.32786e-23	Cpr65Au	X	FBgn0038042	1013.15	-4.54132	0.535828	-8.47533	2.34e-17	2.71e-16	Scgbeta	X	FBgn0041713	440.298	7.08077	0.589711	12.0072	3.25728e-33	3.89393e-32	yellow-c
FBgn0259219	701.168	5.3183	0.527581	10.0805	6.73587e-24	8.07892e-23	CG42319	X	FBgn0034512	2018.8	4.54175	0.536205	8.47016	2.45e-17	2.83e-16	CG18067	X	FBgn0031515	1291.27	3.9965	0.333122	11.9971	3.67986e-33	4.39371e-32	CG9664
FBgn0264542	1608.17	-3.43665	0.341418	-10.0658	7.82467e-24	9.3733e-23	CG43921	X	FBgn0025625	1055.78	-5.63571	0.666191	-8.4596	2.68e-17	3.1e-16	Sik2	X	FBgn0014031	1155.85	6.50209	0.542614	11.9829	4.36831e-33	5.20932e-32	Spat
FBgn0032280	5595.41	7.43553	0.738966	10.0621	8.12698e-24	9.72352e-23	CG17105	X	FBgn0031365	133.561	6.34115	0.750356	8.45086	2.89e-17	3.33e-16	CG17650	X	FBgn0029821	300.816	5.09197	0.42539	11.9701	5.09627e-33	6.06999e-32	CG4020
FBgn0014879	6754.75	-2.58123	0.256564	-10.0608	8.23593e-24	9.84184e-23	Set	X	FBgn0030347	427.32	4.26738	0.505033	8.44971	2.92e-17	3.36e-16	CG15739	X	FBgn0283510	4208.9	2.34621	0.196212	11.9575	5.93162e-33	7.0563e-32	Pal1
FBgn0010041	329.271	6.50909	0.647523	10.0523	8.97453e-24	1.07114e-22	GstD5	X	FBgn0039203	149.236	6.67892	0.790536	8.4486	2.95e-17	3.39e-16	CG13618	X	FBgn0069354	379.393	5.87125	0.491193	11.953	6.25928e-33	7.437e-32	Porin2
FBgn0028644	431.665	-8.48906	0.845184	-10.044	9.76045e-24	1.16352e-22	beat-Ic	X	FBgn0263994	1202.45	-4.47613	0.529888	-8.44731	2.98e-17	3.42e-16	CG43737	X	FBgn0030521	15342	2.65558	0.22219	11.9519	6.3491e-33	7.53452e-32	CtsB1
FBgn0050359	8771.68	2.50367	0.249666	10.0281	1.14694e-23	1.36557e-22	Mal-A5	X	FBgn0037935	320.772	5.24081	0.620622	8.44445	3.05e-17	3.5e-16	CG6834	X	FBgn0026141	228.032	7.41568	0.621281	11.9361	7.67259e-33	9.09402e-32	Cdlc2
FBgn0029747	150.931	6.57631	0.655965	10.0254	1.1788e-23	1.4018e-22	CG5062	X	FBgn0083975	339.098	-4.28208	0.507962	-8.42992	3.46e-17	3.96e-16	Nlg4	X	FBgn0053293	180.434	7.39298	0.619468	11.9344	7.83143e-33	9.27101e-32	CG33293
FBgn0029834	430.476	-4.20608	0.419919	-10.0164	1.29117e-23	1.53355e-22	CG5937	X	FBgn0031012	238.338	6.11832	0.725956	8.42795	3.52e-17	4.02e-16	CG8051	X	FBgn0040817	1642.55	3.80285	0.318743	11.9308	8.18242e-33	9.67474e-32	CG14132
FBgn0043002	1672.56	-2.79216	0.278854	-10.013	1.33628e-23	1.58522e-22	Chrac-14	X	FBgn0037128	623.475	4.17195	0.495128	8.426	3.58e-17	4.09e-16	CG14572	X	FBgn0264296	191.481	8.05382	0.675387	11.9247	8.79556e-33	1.03871e-31	CG43774
FBgn0030742	2237.66	-4.62545	0.46242	-10.0027	1.48309e-23	1.75724e-22	CG9919	X	FBgn0038652	575.538	3.65769	0.434109	8.42574	3.58e-17	4.09e-16	CG7720	X	FBgn0030746	153.159	6.27349	0.526111	11.9243	8.84608e-33	1.04341e-31	CG9981
FBgn0022774	4076.8	2.67624	0.267593	10.0012	1.50624e-23	1.7825e-22	Oat	X	FBgn0020399	199.876	6.46597	0.767693	8.42259	3.68e-17	4.2e-16	Mst89B	X	FBgn0032117	778.599	2.60567	0.21855	11.9225	9.03049e-33	1.06382e-31	FucTB
FBgn0038966	1142.21	4.2008	0.420377	9.99292	1.63683e-23	1.9347e-22	pinta	X	FBgn0033518	136.655	7.05327	0.83861	8.41067	4.08e-17	4.64e-16	Prx2540-2	X	FBgn0051072	2105.53	2.93327	0.246029	11.9225	9.04101e-33	1.06382e-31	Lerp
FBgn0261575	376.984	6.24054	0.624623	9.99089	1.67076e-23	1.97242e-22	tobi	X	FBgn0031004	234.593	6.13775	0.72991	8.4089	4.14e-17	4.71e-16	CG7992	X	FBgn0034301	377.901	6.28495	0.527344	11.9181	9.52357e-33	1.11925e-31	CG5756
FBgn0002930	467.743	5.3364	0.534596	9.98211	1.82548e-23	2.15248e-22	nec	X	FBgn0053519	342.457	5.47877	0.65175	8.40624	4.23e-17	4.81e-16	Unc-89	X	FBgn0039612	242.705	5.47466	0.459409	11.9167	9.68148e-33	1.13644e-31	CG14523
FBgn0035823	159.638	5.94305	0.595794	9.975	1.96098e-23	2.30947e-22	eIF4E-5	X	FBgn0023178	509.915	-4.76537	0.56763	-8.3952	4.65e-17	5.28e-16	Pdf	X	FBgn0034224	914.239	-4.55276	0.382425	-11.905	1.115e-32	1.30724e-31	insb
FBgn0037064	194.522	5.34007	0.535459	9.97287	2.00347e-23	2.35666e-22	CG9389	X	FBgn0010504	1429.67	3.39806	0.405376	8.38249	5.18e-17	5.87e-16	kermit	X	FBgn0053318	160.363	6.65593	0.5599	11.8877	1.37136e-32	1.60586e-31	CR33318
FBgn0035170	189.699	-5.47429	0.548993	-9.97151	2.03112e-23	2.38633e-22	dpr20	X	FBgn0034199	1254.71	5.0712	0.605395	8.37668	5.44e-17	6.16e-16	Gbp1	X	FBgn0032771	191.083	7.07421	0.595729	11.8749	1.59868e-32	1.86981e-31	CG17349
FBgn0028527	588.441	4.12843	0.414279	9.96534	2.16137e-23	2.5363e-22	CG18507	X	FBgn0038565	162.811	4.93108	0.58889	8.37351	5.59e-17	6.32e-16	CG7794	X	FBgn0034740	158.604	6.45239	0.5434	11.8741	1.61355e-32	1.88493e-31	nsr
FBgn0266777	648.373	-4.37374	0.439247	-9.95737	2.34168e-23	2.7446e-22	CR45242	X	FBgn0011270	123.29	7.39224	0.883172	8.3701	5.76e-17	6.5e-16	Pglym87	X	FBgn0030258	614.346	-4.61372	0.388624	-11.872	1.6554e-32	1.9315e-31	CG1552
FBgn0035798	197.497	8.63586	0.867326	9.95688	2.35328e-23	2.75489e-22	frac	X	FBgn0031251	273.454	5.62467	0.67237	8.36544	5.99e-17	6.75e-16	CG4213	X	FBgn0036481	384.87	5.44847	0.459376	11.8606	1.89614e-32	2.20974e-31	CG16959
FBgn0041181	341.186	6.11058	0.614068	9.95097	2.49732e-23	2.92002e-22	Tep3	X	FBgn0032100	375.475	-3.97836	0.475574	-8.36539	5.99e-17	6.75e-16	CG13108	X	FBgn0040393	487.332	8.50372	0.717216	11.8566	1.98994e-32	2.31628e-31	CG14265
FBgn0032797	978.699	-4.18392	0.420641	-9.94653	2.6113e-23	3.04964e-22	Hasp	X	FBgn0035495	9931.64	-3.16281	0.378182	-8.36319	6.1e-17	6.87e-16	CG14989	X	FBgn0020399	163.69	7.27018	0.613631	11.8478	2.2088e-32	2.56796e-31	Mst89B
FBgn0043577	750.51	7.47516	0.751627	9.9453	2.64372e-23	3.08381e-22	PGRP-SB2	X	FBgn0051183	574.875	4.44087	0.531271	8.35895	6.33e-17	7.1e-16	CG31183	X	FBgn0267811	208.987	7.42555	0.627179	11.8396	2.43609e-32	2.82882e-31	CR46136
FBgn0030326	17113.9	7.20407	0.724693	9.94086	2.76426e-23	3.22058e-22	CG2444	X	FBgn0267408	1765.84	5.42752	0.649301	8.35902	6.32e-17	7.1e-16	AOX1	X	FBgn0036437	182.509	7.09519	0.599694	11.8314	2.6877e-32	3.11728e-31	CG5048
FBgn0027585	869.908	4.74413	0.477286	9.93981	2.79371e-23	3.25101e-22	CG8740	X	FBgn0260943	9380.18	-3.28673	0.393302	-8.35678	6.45e-17	7.22e-16	Rbp6	X	FBgn0051075	14013.3	3.2693	0.276783	11.8118	3.39229e-32	3.9298e-31	CG31075
FBgn0263235	213.19	7.11785	0.716655	9.93205	3.01997e-23	3.51014e-22	Phae2	X	FBgn0038311	432.327	3.77696	0.452444	8.3479	6.95e-17	7.78e-16	CG14864	X	FBgn0051231	154.496	6.36234	0.538721	11.8101	3.46265e-32	4.00654e-31	CG31231
FBgn0040281	1825.69	-3.21656	0.324291	-9.91876	3.4501e-23	4.00532e-22	Aplip1	X	FBgn0053218	371.17	5.89022	0.70612	8.34167	7.32e-17	8.19e-16	CR33218	X	FBgn0040384	3662.57	2.37176	0.200917	11.8047	3.69101e-32	4.2657e-31	CG32795
FBgn0260793	492.807	-4.36305	0.44042	-9.90656	3.89826e-23	4.52022e-22	2mit	X	FBgn0038109	222.413	4.95844	0.594685	8.33791	7.56e-17	8.44e-16	CG11656	X	FBgn0033936	383.889	5.94979	0.504107	11.8026	3.78231e-32	4.36603e-31	CG17386
FBgn0043001	2103.98	-3.03535	0.306729	-9.89584	4.33943e-23	5.02582e-22	Chrac-16	X	FBgn0045761	4619.43	3.55598	0.426493	8.33772	7.57e-17	8.45e-16	CHKov1	X	FBgn0036469	741.213	9.39734	0.796575	11.7972	4.0361e-32	4.65347e-31	CG18649
FBgn0037217	456.498	4.43846	0.448538	9.8954	4.35877e-23	5.04224e-22	CG14636	X	FBgn0036443	145.07	6.76593	0.811725	8.33525	7.73e-17	8.62e-16	CG13471	X	FBgn0029722	167.25	5.416	0.459237	11.7935	4.21749e-32	4.85685e-31	CG7024
FBgn0033207	287.061	6.03438	0.610476	9.88472	4.84931e-23	5.60308e-22	CG12826	X	FBgn0259229	478.303	4.7707	0.572688	8.33037	8.06e-17	8.97e-16	CG42329	X	FBgn0033355	212.306	7.40893	0.628462	11.789	4.44875e-32	5.11711e-31	CG13748
FBgn0033782	299.572	4.58815	0.464211	9.88376	4.89615e-23	5.65052e-22	sug	X	FBgn0033949	788.672	4.19325	0.503634	8.32598	8.36e-17	9.3e-16	CG10131	X	FBgn0262515	15578.5	2.53844	0.215354	11.7873	4.53885e-32	5.21459e-31	VhaAC45
FBgn0038547	984.099	-3.13071	0.316912	-9.8788	5.14438e-23	5.92999e-22	CG17803	X	FBgn0052354	1009.65	-3.49412	0.42014	-8.31656	9.06e-17	1.01e-15	CG32354	X	FBgn0031251	294.582	4.79111	0.407021	11.7712	5.4961e-32	6.30691e-31	CG4213
FBgn0029898	792.71	3.11304	0.315429	9.86924	5.65928e-23	6.51584e-22	CG14439	X	FBgn0037204	1065.98	6.47167	0.779035	8.30729	9.79e-17	1.09e-15	CG11131	X	FBgn0052170	261.062	4.39939	0.373759	11.7707	5.52817e-32	6.33623e-31	CG32170
FBgn0036337	2469.78	2.75286	0.278953	9.86857	5.69734e-23	6.55194e-22	AdenoK	X	FBgn0037464	151.915	6.41306	0.772587	8.30076	1.03e-16	1.15e-15	CG1988	X	FBgn0050463	2487.96	3.3122	0.282299	11.7329	8.63971e-32	9.89094e-31	CG30463
FBgn0265597	777.07	-3.76534	0.382167	-9.85261	6.67884e-23	7.67164e-22	rad	X	FBgn0038547	1294.35	-3.74386	0.451269	-8.29628	1.07e-16	1.19e-15	CG17803	X	FBgn0038037	6816.95	3.93512	0.335644	11.7241	9.59393e-32	1.09705e-30	Cyp9f2
FBgn0013681	8002.02	-5.57641	0.566325	-9.84667	7.08546e-23	8.12916e-22	ND3	X	FBgn0039109	1570.16	3.83434	0.462556	8.28948	1.14e-16	1.26e-15	CG10365	X	FBgn0034828	270.688	7.20231	0.614441	11.7217	9.86391e-32	1.12659e-30	CG13545
FBgn0001149	25470.7	2.51417	0.255628	9.83528	7.93461e-23	9.09271e-22	GstD1	X	FBgn0035711	164.474	6.79798	0.820437	8.28581	1.17e-16	1.29e-15	CG8519	X	FBgn0001319	512.149	-4.34173	0.370515	-11.7181	1.02952e-31	1.17447e-30	kn
FBgn0031865	912.287	5.887	0.598817	9.83105	8.27521e-23	9.47192e-22	Nha1	X	FBgn0002567	1159.35	3.68889	0.445384	8.28249	1.21e-16	1.33e-15	Rab32	X	FBgn0001197	14801.2	-2.56654	0.219116	-11.7132	1.09127e-31	1.24346e-30	His2Av
FBgn0033047	228.777	7.59109	0.772396	9.82798	8.53145e-23	9.75379e-22	CG7882	X	FBgn0266750	446.744	-3.95504	0.477574	-8.28152	1.22e-16	1.34e-15	CR45223	X	FBgn0250845	281.247	7.97549	0.681362	11.7052	1.19848e-31	1.36403e-30	CG1288
FBgn0038404	155.57	5.52048	0.562063	9.82183	9.06829e-23	1.03554e-21	CG8925	X	FBgn0263979	5576.95	-2.8397	0.343126	-8.27598	1.27e-16	1.4e-15	Caf1-55	X	FBgn0030932	397.444	3.31113	0.283042	11.6984	1.29937e-31	1.47713e-30	Ggt-1
FBgn0284248	6042.37	-2.20136	0.224197	-9.81889	9.3368e-23	1.06496e-21	Cyt-c-p	X	FBgn0038909	289.93	4.08283	0.493348	8.27576	1.28e-16	1.4e-15	CG6569	X	FBgn0030925	172.093	5.47893	0.468361	11.6981	1.3033e-31	1.47986e-30	Hayan
FBgn0004896	284.026	-5.8829	0.600203	-9.80152	1.10909e-22	1.26356e-21	fd59A	X	FBgn0263772	689.202	-3.70206	0.447436	-8.27394	1.3e-16	1.42e-15	CG43689	X	FBgn0039498	146.065	6.14812	0.525632	11.6966	1.3264e-31	1.50434e-30	CG17991
FBgn0004552	3988.18	-4.25839	0.434482	-9.80107	1.11398e-22	1.26765e-21	Akh	X	FBgn0053517	253.111	-5.58491	0.675196	-8.27154	1.32e-16	1.45e-15	Dop2R	X	FBgn0050430	410.373	7.5235	0.64325	11.6961	1.33498e-31	1.51231e-30	CG30430
FBgn0034069	372.419	-4.90878	0.50135	-9.79112	1.22927e-22	1.39722e-21	CG8401	X	FBgn0037560	425.215	4.59042	0.555096	8.2696	1.34e-16	1.47e-15	CR18228	X	FBgn0038453	3397.53	-2.74391	0.234672	-11.6925	1.39176e-31	1.57479e-30	CG10326
FBgn0023507	881.401	3.86209	0.394467	9.79067	1.23471e-22	1.40178e-21	D2hgdh	X	FBgn0010225	5695	3.17853	0.384496	8.26676	1.38e-16	1.51e-15	Gel	X	FBgn0020238	58874.7	-2.34463	0.200724	-11.6809	1.59594e-31	1.80373e-30	14-3-3epsilon
FBgn0035308	517.142	3.45767	0.353183	9.79003	1.24263e-22	1.40913e-21	CG15822	X	FBgn0034479	157.253	5.75118	0.69588	8.26461	1.4e-16	1.53e-15	CG8654	X	FBgn0025595	312.978	5.57112	0.477448	11.6685	1.84563e-31	2.0835e-30	AkhR
FBgn0038463	771.059	3.07862	0.314636	9.7847	1.30985e-22	1.48364e-21	CG3534	X	FBgn0039070	160.44	4.88198	0.591025	8.2602	1.45e-16	1.59e-15	CG17083	X	FBgn0033724	1547.39	3.70234	0.317351	11.6664	1.89311e-31	2.13463e-30	CG8501
FBgn0032520	242.643	5.37789	0.549829	9.78101	1.35846e-22	1.53692e-21	CG10859	X	FBgn0039102	271.511	6.3757	0.773954	8.23783	1.75e-16	1.91e-15	SPE	X	FBgn0032615	232.14	7.79128	0.668127	11.6614	2.00777e-31	2.2613e-30	CG6012
FBgn0265299	784.709	-4.74038	0.484981	-9.77438	1.45045e-22	1.63909e-21	CR44272	X	FBgn0037721	851.416	4.56009	0.554695	8.2209	2.02e-16	2.2e-15	CG9427	X	FBgn0003965	186.974	5.71705	0.490748	11.6497	2.30321e-31	2.59104e-30	v
FBgn0037222	220.678	4.39014	0.449252	9.77211	1.48337e-22	1.67436e-21	CG14642	X	FBgn0029826	871.887	3.23163	0.39314	8.22004	2.03e-16	2.21e-15	CG6041	X	FBgn0003053	479.318	4.33523	0.3722	11.6476	2.36052e-31	2.65245e-30	peb
FBgn0020513	7819.12	3.163	0.323997	9.76245	1.6316e-22	1.83955e-21	ade5	X	FBgn0039593	515.479	5.74718	0.69984	8.21213	2.17e-16	2.36e-15	Sid	X	FBgn0036367	312.475	7.97051	0.684479	11.6446	2.4435e-31	2.74253e-30	CG10116
FBgn0030679	1205.14	2.52151	0.258295	9.76213	1.63676e-22	1.84324e-21	CG8206	X	FBgn0033767	567.23	-3.562	0.434052	-8.20639	2.28e-16	2.47e-15	CG13148	X	FBgn0029939	1560.36	-2.49927	0.214862	-11.632	2.83439e-31	3.17393e-30	CG9650
FBgn0036759	808.536	3.76211	0.385909	9.74869	1.86856e-22	2.10186e-21	CG5577	X	FBgn0000422	6952.91	3.76559	0.459126	8.20165	2.37e-16	2.57e-15	Ddc	X	FBgn0038476	5357.94	-2.52208	0.216978	-11.6237	3.12423e-31	3.49446e-30	kuk
FBgn0035449	1421.03	3.52814	0.362004	9.74615	1.91604e-22	2.15279e-21	CG14971	X	FBgn0262353	1683.26	4.62408	0.563944	8.19955	2.41e-16	2.61e-15	CR43051	X	FBgn0038079	463.311	4.72297	0.406356	11.6227	3.1586e-31	3.52886e-30	NijC
FBgn0052183	247.399	-7.35295	0.754591	-9.74428	1.95159e-22	2.19021e-21	Ccn	X	FBgn0039734	1294.4	-3.58628	0.437707	-8.19333	2.54e-16	2.75e-15	Tace	X	FBgn0034365	1143.5	4.14081	0.356556	11.6134	3.52425e-31	3.93285e-30	CG5335
FBgn0004828	64199.2	-2.74355	0.281606	-9.74253	1.98544e-22	2.22565e-21	His3.3B	X	FBgn0032422	783.38	4.54034	0.55446	8.18876	2.64e-16	2.85e-15	atilla	X	FBgn0003326	752.437	-2.94277	0.253625	-11.6028	3.98606e-31	4.4431e-30	sca
FBgn0040465	1244	-3.36966	0.346052	-9.73743	2.08758e-22	2.33747e-21	Dlip3	X	FBgn0083956	370.849	4.43432	0.54151	8.1888	2.64e-16	2.85e-15	CG34120	X	FBgn0262579	1640.36	2.44696	0.210905	11.6022	4.01756e-31	4.4731e-30	Ect4
FBgn0085466	150.203	5.4402	0.558966	9.73261	2.18893e-22	2.44815e-21	CG34437	X	FBgn0050324	138.353	5.94966	0.7266	8.18835	2.65e-16	2.85e-15	CG30324	X	FBgn0050362	198.401	4.84585	0.41777	11.5993	4.15401e-31	4.61973e-30	boly
FBgn0030658	3842	3.70879	0.381102	9.73175	2.2076e-22	2.46621e-21	CG7872	X	FBgn0002862	883.351	6.46272	0.791017	8.17013	3.08e-16	3.31e-15	Mst87F	X	FBgn0050431	373.441	8.51232	0.734169	11.5945	4.39497e-31	4.88213e-30	CG30431
FBgn0261791	5807.17	-3.22031	0.331009	-9.72878	2.27309e-22	2.53647e-21	SNRPG	X	FBgn0000715	666.196	-5.07316	0.621458	-8.16332	3.26e-16	3.5e-15	FMRFa	X	FBgn0085320	423.945	6.66061	0.575238	11.5789	5.27283e-31	5.85061e-30	CG34291
FBgn0085383	594.175	-3.96597	0.407741	-9.72669	2.32013e-22	2.58601e-21	CG34354	X	FBgn0040340	11979	3.18901	0.390867	8.15882	3.38e-16	3.63e-15	TRAM	X	FBgn0035988	405.131	5.55545	0.479963	11.5747	5.53327e-31	6.13261e-30	CG3982
FBgn0262722	170.045	6.20168	0.637676	9.72545	2.34875e-22	2.61493e-21	CR43166	X	FBgn0028371	1793.8	3.77966	0.463562	8.15352	3.53e-16	3.79e-15	jbug	X	FBgn0054056	443.888	3.49733	0.302233	11.5716	5.737e-31	6.35116e-30	CG34056
FBgn0032651	2347.78	-4.62653	0.475795	-9.72378	2.38745e-22	2.65499e-21	Oli	X	FBgn0028999	7829.07	-4.89391	0.600261	-8.15298	3.55e-16	3.8e-15	nerfin-1	X	FBgn0000153	757.145	6.40396	0.553779	11.5641	6.26355e-31	6.92621e-30	b
FBgn0053192	331.968	7.26728	0.747598	9.72083	2.45768e-22	2.72998e-21	MtnD	X	FBgn0010241	291.204	5.48731	0.67347	8.14781	3.71e-16	3.96e-15	Mdr50	X	FBgn0045761	2103.66	3.17936	0.27534	11.547	7.64329e-31	8.44232e-30	CHKov1
FBgn0051639	368.383	7.65245	0.788036	9.7108	2.71213e-22	3.0092e-21	CG31639	X	FBgn0005775	1285.37	-4.1179	0.505572	-8.14502	3.79e-16	4.05e-15	Con	X	FBgn0028999	6340.75	-3.73888	0.323988	-11.5402	8.27624e-31	9.13108e-30	nerfin-1
FBgn0028523	1343.95	-3.23974	0.334138	-9.69581	3.14129e-22	3.48141e-21	CG5888	X	FBgn0015801	4359.94	3.85622	0.47365	8.1415	3.9e-16	4.17e-15	Reg-5	X	FBgn0028537	2106.61	6.86318	0.594762	11.5394	8.35391e-31	9.20634e-30	CG31775
FBgn0029891	2238.96	2.41426	0.249214	9.68749	3.40798e-22	3.77271e-21	Pink1	X	FBgn0032345	233.898	4.91066	0.603498	8.137	4.05e-16	4.32e-15	CG14921	X	FBgn0040260	505.135	4.29655	0.372709	11.5279	9.54673e-31	1.0509e-29	Ugt36Bc
FBgn0013763	9155.16	3.43815	0.355095	9.68235	3.58394e-22	3.96302e-21	Idgf6	X	FBgn0045038	1267	-3.72272	0.457556	-8.13608	4.08e-16	4.35e-15	Proc	X	FBgn0051313	1486.47	5.84682	0.507669	11.517	1.08322e-30	1.19105e-29	CG31313
FBgn0013334	6577.07	-3.03617	0.313637	-9.68052	3.6484e-22	4.02973e-21	Sap47	X	FBgn0036381	2716.92	3.45101	0.424251	8.13435	4.14e-16	4.41e-15	CG8745	X	FBgn0038412	425.026	5.26972	0.457659	11.5145	1.1148e-30	1.22439e-29	Zip89B
FBgn0038414	164.404	7.3203	0.756437	9.67734	3.76364e-22	4.15232e-21	CG6901	X	FBgn0036204	174.258	7.82952	0.96278	8.1322	4.22e-16	4.48e-15	Tim13	X	FBgn0032824	1009.69	7.10725	0.617261	11.5142	1.11938e-30	1.22804e-29	CG13962
FBgn0002567	843.259	4.1032	0.424222	9.67231	3.95354e-22	4.35692e-21	Rab32	X	FBgn0266742	138.835	5.88376	0.723651	8.13067	4.27e-16	4.53e-15	CR45215	X	FBgn0033031	1037	-3.91458	0.340248	-11.5051	1.24397e-30	1.36318e-29	CG8245
FBgn0015766	8743.66	2.31894	0.23978	9.67111	4.00024e-22	4.40342e-21	Msr-110	X	FBgn0051321	437.055	5.74161	0.706553	8.12622	4.43e-16	4.7e-15	CG31321	X	FBgn0030319	153.224	6.73538	0.585868	11.4964	1.37505e-30	1.50514e-29	CG2533
FBgn0053517	251.143	-4.26037	0.440737	-9.66647	4.18586e-22	4.60256e-21	Dop2R	X	FBgn0041707	2730.29	-3.626	0.44643	-8.12223	4.58e-16	4.85e-15	7B2	X	FBgn0262100	190.644	7.23571	0.630287	11.48	1.66229e-30	1.81749e-29	CG42853
FBgn0033635	3469.44	2.89756	0.300279	9.64955	4.93731e-22	5.42272e-21	Prip	X	FBgn0015872	402.332	4.67231	0.575314	8.12131	4.61e-16	4.88e-15	Drip	X	FBgn0035165	8925.1	2.11904	0.184592	11.4796	1.67119e-30	1.82518e-29	CG13887
FBgn0000053	4069.51	3.33553	0.345965	9.64123	5.35428e-22	5.87409e-21	ade3	X	FBgn0265575	992.538	3.80149	0.468097	8.12116	4.62e-16	4.88e-15	yin	X	FBgn0260799	4399.1	-2.48198	0.216336	-11.4728	1.80741e-30	1.97174e-29	p120ctn
FBgn0000633	1486.61	-3.91463	0.406169	-9.63793	5.52941e-22	6.05941e-21	fas	X	FBgn0031085	177.512	7.1987	0.886833	8.11731	4.77e-16	5.03e-15	CG9570	X	FBgn0039714	1877.54	3.50039	0.305136	11.4716	1.83292e-30	1.99733e-29	Zip99C
FBgn0035620	175.832	8.44817	0.878059	9.62142	6.49305e-22	7.10745e-21	CG5150	X	FBgn0000625	167.825	4.62544	0.570359	8.1097	5.07e-16	5.35e-15	eyg	X	FBgn0051802	257.774	8.6838	0.757258	11.4674	1.92293e-30	2.09306e-29	CG31802
FBgn0033767	398.126	-6.02446	0.626354	-9.6183	6.69293e-22	7.31806e-21	CG13148	X	FBgn0039694	183.108	5.71661	0.705139	8.10707	5.19e-16	5.46e-15	fig	X	FBgn0041789	6268.11	2.63527	0.229819	11.4667	1.93929e-30	2.10852e-29	Pax
FBgn0063498	850.385	-3.74301	0.389323	-9.61417	6.96714e-22	7.60936e-21	GstE2	X	FBgn0029123	2974.82	-3.4916	0.430978	-8.10157	5.43e-16	5.71e-15	SoxN	X	FBgn0015011	898.771	5.87617	0.512516	11.4653	1.97006e-30	2.13958e-29	AhcyL2
FBgn0004839	3328.16	-3.40426	0.354263	-9.60942	7.29562e-22	7.95922e-21	otk	X	FBgn0032715	1709.09	3.16382	0.390765	8.09648	5.66e-16	5.94e-15	CG17597	X	FBgn0036687	186.488	5.54599	0.483942	11.46	2.09428e-30	2.27196e-29	CG6652
FBgn0262636	1408.77	-3.86361	0.402304	-9.60369	7.71291e-22	8.40509e-21	dati	X	FBgn0030798	317.598	4.42589	0.546672	8.09607	5.68e-16	5.96e-15	CG13003	X	FBgn0027376	175.157	7.38349	0.644347	11.4589	2.12247e-30	2.29997e-29	rha
FBgn0028543	1446.84	5.26618	0.548483	9.60136	7.88942e-22	8.58787e-21	NimB2	X	FBgn0259927	1631.24	-3.51396	0.434201	-8.09294	5.82e-16	6.11e-15	CG42450	X	FBgn0029079	2140.34	-3.05837	0.266976	-11.4556	2.20443e-30	2.38613e-29	icln
FBgn0035131	631.305	4.40644	0.459254	9.59477	8.41051e-22	9.14491e-21	mthl9	X	FBgn0035638	171.524	4.90999	0.607037	8.08845	6.04e-16	6.33e-15	Tektin-C	X	FBgn0038214	436.657	6.79699	0.593367	11.455	2.22082e-30	2.4012e-29	CG9616
FBgn0036560	422.253	-7.64382	0.797095	-9.5896	8.843e-22	9.60448e-21	CG5895	X	FBgn0037737	789.418	-3.1862	0.39406	-8.08558	6.19e-16	6.47e-15	Pnn	X	FBgn0264449	2315.27	-2.44437	0.213435	-11.4525	2.28354e-30	2.46628e-29	CG43867
FBgn0031128	136.809	6.77902	0.707393	9.58311	9.41694e-22	1.02165e-20	hydra	X	FBgn0259145	872.129	-3.4724	0.429534	-8.08411	6.26e-16	6.54e-15	CG42260	X	FBgn0031304	1434.05	3.15516	0.275501	11.4524	2.28631e-30	2.46653e-29	CG4552
FBgn0034688	1638.95	4.1819	0.436437	9.58192	9.52562e-22	1.03229e-20	CG11474	X	FBgn0085391	2949.75	-3.90696	0.483309	-8.08377	6.28e-16	6.55e-15	trv	X	FBgn0033289	385.91	6.28636	0.548967	11.4513	2.31747e-30	2.49738e-29	CG2121
FBgn0032172	1272.97	2.56957	0.268475	9.57097	1.05909e-21	1.14647e-20	CG5850	X	FBgn0259241	611.655	-3.88671	0.48086	-8.08283	6.33e-16	6.6e-15	CG42339	X	FBgn0264542	1330.39	-3.06687	0.267951	-11.4456	2.47266e-30	2.66167e-29	CG43921
FBgn0033911	589.03	-3.79563	0.396864	-9.56405	1.13235e-21	1.22442e-20	VGAT	X	FBgn0052311	3010.38	3.39763	0.420364	8.08259	6.34e-16	6.6e-15	zormin	X	FBgn0031682	1381.31	2.52473	0.220713	11.439	2.67064e-30	2.8716e-29	CG5828
FBgn0010395	169.526	5.20379	0.544117	9.56373	1.13586e-21	1.22685e-20	Itgbn	X	FBgn0032431	234.739	6.42147	0.794711	8.08025	6.46e-16	6.72e-15	CG5435	X	FBgn0085771	1001.82	5.90553	0.516442	11.435	2.79405e-30	3.00099e-29	28SrRNA-Psi:CR40741
FBgn0264449	2228.79	-2.6639	0.278761	-9.55623	1.22122e-21	1.3176e-20	CG43867	X	FBgn0085384	1205.43	-3.33407	0.412624	-8.08017	6.47e-16	6.72e-15	CG34355	X	FBgn0265726	1844.22	4.54772	0.398047	11.4251	3.13316e-30	3.3615e-29	Nna1
FBgn0034543	2172.2	2.36567	0.247919	9.54212	1.39942e-21	1.5082e-20	galla-1	X	FBgn0083950	660.857	-4.24053	0.525048	-8.07646	6.67e-16	6.92e-15	CG34114	X	FBgn0260954	1891.31	7.11471	0.623002	11.42	3.32075e-30	3.55883e-29	CG42586
FBgn0027793	643.659	-2.75208	0.288473	-9.54018	1.42589e-21	1.53503e-20	CG14787	X	FBgn0035679	1463.79	3.10928	0.38511	8.07375	6.82e-16	7.07e-15	CG10467	X	FBgn0010651	3111.4	3.43592	0.300971	11.4161	3.47378e-30	3.71874e-29	MFS14
FBgn0030148	199.238	6.43284	0.674493	9.5373	1.46602e-21	1.5765e-20	CG3106	X	FBgn0022774	5775.45	2.83431	0.35112	8.07219	6.91e-16	7.15e-15	Oat	X	FBgn0003607	6791.55	-2.82985	0.247958	-11.4126	3.61733e-30	3.86815e-29	Su(var)205
FBgn0035325	205.233	6.0781	0.637501	9.53426	1.50956e-21	1.62153e-20	CG13806	X	FBgn0050355	168.39	6.97248	0.863931	8.07064	6.99e-16	7.23e-15	CG30355	X	FBgn0031907	10939	6.44743	0.565234	11.4067	3.87339e-30	4.13743e-29	CG5171
FBgn0026061	324.695	5.3987	0.566378	9.53198	1.54312e-21	1.65576e-20	Mipp1	X	FBgn0262687	279.088	6.18554	0.76669	8.06784	7.16e-16	7.39e-15	CR43157	X	FBgn0051407	188.234	7.29574	0.639857	11.4021	4.07961e-30	4.35292e-29	CG31407
FBgn0262858	2882.22	-3.45964	0.362999	-9.53071	1.56219e-21	1.67438e-20	CG43222	X	FBgn0001122	8246	-3.02413	0.374912	-8.06623	7.25e-16	7.48e-15	Galphao	X	FBgn0040382	5802.33	2.87986	0.252991	11.3832	5.06756e-30	5.40114e-29	CG5273
FBgn0037090	134.279	5.2492	0.551025	9.52624	1.63077e-21	1.74598e-20	Est-Q	X	FBgn0051913	209.36	6.58153	0.816592	8.05976	7.64e-16	7.88e-15	CG31913	X	FBgn0030964	271.807	4.64587	0.408472	11.3738	5.64999e-30	6.01532e-29	Pvf1
FBgn0035358	185.982	5.20336	0.546868	9.51482	1.82022e-21	1.94668e-20	CG14949	X	FBgn0052657	326.101	5.94369	0.737466	8.05962	7.65e-16	7.88e-15	CR32657	X	FBgn0030105	2498.76	6.88695	0.607291	11.3405	8.27086e-30	8.79604e-29	CG15369
FBgn0029932	457.842	5.44675	0.572475	9.5144	1.82759e-21	1.95243e-20	CG4607	X	FBgn0034253	806.505	4.53274	0.56286	8.05304	8.08e-16	8.31e-15	CG10936	X	FBgn0036782	290.477	6.20856	0.547703	11.3356	8.7405e-30	9.28535e-29	CG7320
FBgn0028542	289.186	4.73622	0.498062	9.5093	1.91944e-21	2.04831e-20	NimB4	X	FBgn0010114	945.199	-3.46257	0.430075	-8.0511	8.21e-16	8.43e-15	hig	X	FBgn0035449	1865.37	2.97311	0.262404	11.3303	9.29215e-30	9.86062e-29	CG14971
FBgn0047135	25060.3	2.52737	0.265786	9.50903	1.92457e-21	2.05155e-20	CG32276	X	FBgn0037370	5438.42	3.181	0.395389	8.04525	8.61e-16	8.84e-15	CG1236	X	FBgn0038837	732.856	-3.23312	0.285387	-11.3289	9.43758e-30	1.0004e-28	CG3822
FBgn0035427	2397.85	7.26642	0.764234	9.50812	1.94148e-21	2.06732e-20	ckd	X	FBgn0037819	404.677	3.97859	0.495313	8.03249	9.55e-16	9.79e-15	CG14688	X	FBgn0001168	1328.63	2.75638	0.243815	11.3052	1.23683e-29	1.30964e-28	h
FBgn0031822	5070.03	-3.07513	0.323672	-9.50076	2.08361e-21	2.21624e-20	CG9548	X	FBgn0032285	505.616	5.47347	0.681748	8.02858	9.86e-16	1.01e-14	CG17108	X	FBgn0265313	175.963	6.75323	0.59796	11.2938	1.40846e-29	1.48976e-28	CG44286
FBgn0023524	627.901	-3.70449	0.390279	-9.49189	2.26881e-21	2.41061e-20	CG3078	X	FBgn0051337	615.937	4.1113	0.512221	8.02642	1e-15	1.03e-14	CG31337	X	FBgn0030975	311.15	7.0785	0.627032	11.2889	1.4888e-29	1.57161e-28	SdhBL
FBgn0261789	4882.81	-2.4694	0.260199	-9.49043	2.30079e-21	2.44194e-20	SmD2	X	FBgn0262487	187.263	6.10119	0.760375	8.02393	1.02e-15	1.05e-14	CG43077	X	FBgn0085280	212.913	5.25128	0.465173	11.2889	1.48908e-29	1.57161e-28	CG34251
FBgn0039238	431.435	4.98969	0.52607	9.48485	2.42733e-21	2.57345e-20	CG7016	X	FBgn0052459	178.746	5.19065	0.647042	8.02212	1.04e-15	1.06e-14	CG32459	X	FBgn0035146	438.375	3.21209	0.284548	11.2884	1.49784e-29	1.57914e-28	CG13893
FBgn0051030	3169.75	-3.83996	0.404915	-9.48336	2.4622e-21	2.60759e-20	CG31030	X	FBgn0001149	38733.5	3.11343	0.388392	8.0162	1.09e-15	1.11e-14	GstD1	X	FBgn0031501	187.308	5.40217	0.478577	11.288	1.5044e-29	1.58434e-28	CG17261
FBgn0085280	123.121	6.02413	0.635369	9.48131	2.51116e-21	2.65656e-20	CG34251	X	FBgn0032798	609.627	-3.78196	0.47194	-8.01365	1.11e-15	1.13e-14	CG10132	X	FBgn0053307	628.637	6.08575	0.539693	11.2763	1.71776e-29	1.80708e-28	CG33307
FBgn0039900	1014.99	-4.09233	0.431698	-9.47961	2.5524e-21	2.69726e-20	Syt7	X	FBgn0259213	594.204	-5.85798	0.73102	-8.01342	1.12e-15	1.14e-14	CG42313	X	FBgn0033742	377.254	4.56659	0.40498	11.2761	1.72257e-29	1.81019e-28	CG8550
FBgn0032048	905.381	-2.77296	0.292525	-9.47937	2.55821e-21	2.70048e-20	Dh31	X	FBgn0266569	1373.22	3.67155	0.458206	8.01288	1.12e-15	1.14e-14	CG42259	X	FBgn0033065	293.824	8.02733	0.712026	11.2739	1.76495e-29	1.85272e-28	Cyp6w1
FBgn0259749	2469.96	2.61642	0.276155	9.47448	2.68091e-21	2.82696e-20	mmy	X	FBgn0038681	1432.05	3.75105	0.468209	8.0115	1.13e-15	1.15e-14	Cyp12a4	X	FBgn0085360	427.477	4.92417	0.437026	11.2675	1.89982e-29	1.99215e-28	CG34331
FBgn0010453	1427.01	-3.50827	0.370456	-9.47014	2.79478e-21	2.94386e-20	Wnt4	X	FBgn0035598	274.201	3.90352	0.487374	8.0093	1.15e-15	1.17e-14	CG4669	X	FBgn0033366	970.555	5.03692	0.447617	11.2527	2.24537e-29	2.35196e-28	Ance-4
FBgn0032733	165.43	6.69595	0.70718	9.46853	2.83815e-21	2.98632e-20	CG15170	X	FBgn0262972	48294.7	-4.10395	0.512393	-8.00938	1.15e-15	1.17e-14	CR43283	X	FBgn0034693	441.457	6.02477	0.535529	11.2501	2.31227e-29	2.41943e-28	CG11073
FBgn0035007	167.599	7.26411	0.767723	9.46189	3.02434e-21	3.17881e-20	CG3492	X	FBgn0032117	1401.27	3.18898	0.39817	8.00909	1.16e-15	1.17e-14	FucTB	X	FBgn0039015	174.939	5.22755	0.464706	11.2491	2.33843e-29	2.44418e-28	Takl2
FBgn0038037	4442.77	3.74248	0.395658	9.45886	3.11305e-21	3.26853e-20	Cyp9f2	X	FBgn0010435	1967.34	3.47537	0.434068	8.0065	1.18e-15	1.19e-14	emp	X	FBgn0033021	3688.9	-1.96473	0.174709	-11.2457	2.4311e-29	2.53831e-28	CG10417
FBgn0003159	1310.88	3.15418	0.333608	9.45474	3.23818e-21	3.39626e-20	CG2841	X	FBgn0036565	988.377	-3.73852	0.467126	-8.00325	1.21e-15	1.22e-14	CG5235	X	FBgn0035521	1484.49	-4.33155	0.385258	-11.2433	2.49968e-29	2.60711e-28	VhaM9.7-a
FBgn0031092	8007.38	3.08297	0.326105	9.45391	3.26401e-21	3.41968e-20	CG9577	X	FBgn0266977	119.057	6.7715	0.846105	8.00314	1.21e-15	1.22e-14	CG45428	X	FBgn0267383	184.934	5.80326	0.51645	11.2368	2.68884e-29	2.8014e-28	Ubc87F
FBgn0085446	6571.42	3.50021	0.37047	9.44802	3.45284e-21	3.61365e-20	CG34417	X	FBgn0050172	2818.23	-4.24697	0.530912	-7.99939	1.25e-15	1.26e-14	CG30172	X	FBgn0036029	148.356	6.03365	0.537012	11.2356	2.7266e-29	2.8377e-28	CG16719
FBgn0283510	3455.76	2.63812	0.279279	9.44615	3.51507e-21	3.67484e-20	Pal1	X	FBgn0027790	1543.3	4.14092	0.517809	7.99701	1.27e-15	1.28e-14	GV1	X	FBgn0030993	1925.33	5.78986	0.515526	11.231	2.87305e-29	2.98692e-28	Mec2
FBgn0033809	239.72	4.5959	0.487412	9.42919	4.13258e-21	4.31581e-20	CG4630	X	FBgn0032520	310.882	4.30628	0.539354	7.98415	1.41e-15	1.42e-14	CG10859	X	FBgn0037996	272.711	9.0438	0.805625	11.2258	3.0454e-29	3.16273e-28	CG4830
FBgn0034943	145.36	6.96765	0.740523	9.40909	5.00474e-21	5.22106e-20	Fmo-1	X	FBgn0036606	364.499	6.42073	0.804254	7.98346	1.42e-15	1.43e-14	CG13060	X	FBgn0013272	4856.43	2.47303	0.220328	11.2243	3.09763e-29	3.21355e-28	Gp150
FBgn0034538	1017.08	5.01508	0.533586	9.39882	5.51766e-21	5.75001e-20	CG16799	X	FBgn0031182	424.605	3.93204	0.492536	7.98324	1.43e-15	1.43e-14	Cyp6t1	X	FBgn0013278	929.327	2.94523	0.262481	11.2207	3.22586e-29	3.34301e-28	Hsp70Bb
FBgn0036272	2141.19	-2.70129	0.287496	-9.39589	5.67334e-21	5.90596e-20	CG4300	X	FBgn0063491	210.857	4.08864	0.512477	7.97818	1.49e-15	1.49e-14	GstE9	X	FBgn0020513	6957.61	2.55692	0.227923	11.2184	3.31349e-29	3.43016e-28	ade5
FBgn0028857	148.991	8.27131	0.881012	9.38841	6.09122e-21	6.33422e-20	CG12448	X	FBgn0030484	3565.94	3.45524	0.433175	7.97655	1.5e-15	1.51e-14	GstT4	X	FBgn0020521	1927.16	4.00995	0.357477	11.2174	3.35099e-29	3.4653e-28	pio
FBgn0021895	2960.88	-2.34523	0.24981	-9.38805	6.11217e-21	6.34925e-20	ytr	X	FBgn0041195	154.157	7.12349	0.894071	7.96748	1.62e-15	1.62e-14	Pkd2	X	FBgn0038179	1378.76	4.78631	0.426705	11.2169	3.36857e-29	3.47979e-28	CG9312
FBgn0030484	2338.3	3.11921	0.332568	9.37915	6.65072e-21	6.90136e-20	GstT4	X	FBgn0004168	291.171	-4.36794	0.548502	-7.96339	1.67e-15	1.67e-14	5-HT1A	X	FBgn0001218	61650	3.17145	0.282777	11.2154	3.42623e-29	3.53559e-28	Hsc70-3
FBgn0003607	9071.02	-2.73923	0.292088	-9.37809	6.71768e-21	6.96345e-20	Su(var)205	X	FBgn0035346	1567.51	3.67673	0.461738	7.96281	1.68e-15	1.68e-14	CG1146	X	FBgn0028516	300.577	5.20231	0.464099	11.2095	3.66271e-29	3.77562e-28	ZnT35C
FBgn0051076	3136.87	4.46962	0.476829	9.37362	7.00869e-21	7.25741e-20	CG31076	X	FBgn0035481	1493.2	-3.33029	0.418371	-7.96012	1.72e-15	1.71e-14	CG12605	X	FBgn0034137	190.237	4.35628	0.388659	11.2085	3.70446e-29	3.81461e-28	CG4945
FBgn0051921	193.589	4.45255	0.475041	9.37299	7.0508e-21	7.29329e-20	CG31921	X	FBgn0026197	134552	-4.35243	0.547044	-7.95627	1.77e-15	1.77e-14	noe	X	FBgn0012037	5660.5	3.24088	0.289263	11.2039	3.90106e-29	4.01282e-28	Ance
FBgn0030665	470.878	-4.00297	0.427593	-9.36164	7.85091e-21	8.11233e-20	CG15646	X	FBgn0037307	165.405	5.50344	0.691926	7.9538	1.81e-15	1.8e-14	Tim17a2	X	FBgn0087002	12407.8	2.47045	0.220687	11.1943	4.34622e-29	4.46601e-28	apolpp
FBgn0030706	881.801	-3.64476	0.389338	-9.36143	7.8666e-21	8.11996e-20	CG8909	X	FBgn0001281	318.795	5.97174	0.750828	7.95354	1.81e-15	1.8e-14	janB	X	FBgn0025456	11506.4	4.91645	0.439339	11.1906	4.53549e-29	4.65558e-28	CREG
FBgn0003275	4228.59	-2.30922	0.246852	-9.35468	8.38531e-21	8.64624e-20	RpII18	X	FBgn0028886	388.437	6.45141	0.811148	7.95343	1.81e-15	1.8e-14	CG15279	X	FBgn0051788	255.256	8.9494	0.799897	11.1882	4.65825e-29	4.77152e-28	CG31788
FBgn0030763	1400.6	4.82689	0.517411	9.32893	1.06947e-20	1.10159e-19	CG9782	X	FBgn0035008	156.191	6.88924	0.866942	7.9466	1.92e-15	1.9e-14	CG3494	X	FBgn0085409	2144.48	-2.65561	0.237357	-11.1882	4.65559e-29	4.77152e-28	smal
FBgn0004567	787.72	-3.21919	0.345379	-9.32075	1.15516e-20	1.1886e-19	slp2	X	FBgn0031632	2399.28	-3.2668	0.411185	-7.94486	1.94e-15	1.93e-14	CG15628	X	FBgn0036085	165.783	5.27486	0.471563	11.1859	4.77951e-29	4.89058e-28	CG6527
FBgn0033170	718.678	2.75695	0.29589	9.31748	1.19133e-20	1.22453e-19	sPLA2	X	FBgn0259923	1097.45	-3.08052	0.387812	-7.94332	1.97e-15	1.95e-14	2020-09-04	X	FBgn0040823	261.392	-4.35194	0.389201	-11.1817	5.01015e-29	5.12119e-28	dpr6
FBgn0037326	278.658	-4.09116	0.439238	-9.31421	1.22859e-20	1.2615e-19	CG14669	X	FBgn0051041	1185.62	6.39363	0.80523	7.94013	2.02e-15	2e-14	CG31041	X	FBgn0085399	477.53	-4.27022	0.382498	-11.164	6.11653e-29	6.24553e-28	CG34370
FBgn0030964	386.712	5.76894	0.619765	9.30826	1.29945e-20	1.33286e-19	Pvf1	X	FBgn0002930	545.531	5.88831	0.741861	7.93722	2.07e-15	2.04e-14	nec	X	FBgn0051792	166.308	7.64504	0.685136	11.1584	6.51283e-29	6.64322e-28	CG31792
FBgn0052600	400.748	-3.47033	0.372988	-9.30415	1.35065e-20	1.38392e-19	dpr8	X	FBgn0264344	222.863	6.20535	0.782015	7.93508	2.1e-15	2.08e-14	CG43800	X	FBgn0259994	3764.83	-3.68305	0.330102	-11.1573	6.59537e-29	6.72037e-28	CG42492
FBgn0283508	5017.84	2.66585	0.286599	9.3017	1.38224e-20	1.4148e-19	nw	X	FBgn0033862	144.131	5.82428	0.734151	7.93335	2.13e-15	2.1e-14	CG6209	X	FBgn0033598	168.367	5.9519	0.533524	11.1558	6.70623e-29	6.82619e-28	Cpr47Eb
FBgn0034595	246.594	3.56857	0.383882	9.296	1.45828e-20	1.49108e-19	CG15657	X	FBgn0035359	490.717	6.09839	0.76877	7.93265	2.15e-15	2.11e-14	CG1143	X	FBgn0051949	207.666	7.70642	0.691004	11.1525	6.96322e-29	7.08037e-28	CG31949
FBgn0052694	995.136	8.09498	0.871261	9.2911	1.52696e-20	1.55967e-19	CG32694	X	FBgn0035904	5558.03	3.23353	0.407878	7.92768	2.23e-15	2.2e-14	GstO3	X	FBgn0259739	453.635	3.91304	0.351169	11.1429	7.7554e-29	7.87764e-28	CG42393
FBgn0028567	434.271	7.75106	0.834683	9.28624	1.59832e-20	1.63086e-19	robl62A	X	FBgn0058469	10341.3	-4.48208	0.565724	-7.92272	2.32e-15	2.28e-14	CR40469	X	FBgn0040551	1527.31	3.27404	0.293991	11.1366	8.32744e-29	8.44988e-28	CG11686
FBgn0028560	467.593	6.7802	0.730227	9.28505	1.61629e-20	1.64747e-19	sut4	X	FBgn0053322	121.064	6.07103	0.766368	7.92183	2.34e-15	2.3e-14	CG33322	X	FBgn0040963	225.057	9.085	0.815919	11.1347	8.50453e-29	8.62058e-28	CG18662
FBgn0040519	620.797	7.38045	0.795111	9.28229	1.65872e-20	1.68895e-19	CG15219	X	FBgn0051176	368.157	3.76207	0.475128	7.91802	2.41e-15	2.37e-14	CG31176	X	FBgn0010591	3980.69	2.74597	0.24673	11.1295	9.01815e-29	9.13169e-28	Sply
FBgn0053218	134.432	4.75241	0.512441	9.27405	1.79214e-20	1.82291e-19	CR33218	X	FBgn0038498	675.49	-6.44037	0.813545	-7.91643	2.44e-15	2.39e-14	beat-IIa	X	FBgn0011705	1821.36	-3.56165	0.320087	-11.1271	9.25607e-29	9.36287e-28	rost
FBgn0040250	204.684	9.11888	0.983554	9.27135	1.83806e-20	1.86768e-19	Ugt86Dj	X	FBgn0028996	1801.49	-3.65702	0.46205	-7.91478	2.48e-15	2.42e-14	onecut	X	FBgn0262587	216.051	5.18981	0.466759	11.1188	1.01602e-28	1.02668e-27	CG43124
FBgn0035719	870.312	-4.15575	0.448325	-9.2695	1.87021e-20	1.89837e-19	tow	X	FBgn0031127	206.638	5.97897	0.755417	7.91479	2.48e-15	2.42e-14	CG1835	X	FBgn0035571	215.269	4.43688	0.399247	11.1131	1.08294e-28	1.09316e-27	CG12493
FBgn0012344	539.214	-3.95375	0.426855	-9.26251	1.99679e-20	2.02475e-19	Dh44	X	FBgn0259739	1289.75	4.44732	0.561913	7.91461	2.48e-15	2.42e-14	CG42393	X	FBgn0013753	2011.84	-2.72946	0.245775	-11.1055	1.1791e-28	1.189e-27	Bgb
FBgn0033020	144.718	4.63223	0.500436	9.25639	2.11467e-20	2.14206e-19	COX4L	X	FBgn0031627	904.625	-3.16955	0.400962	-7.90484	2.68e-15	2.62e-14	CG15630	X	FBgn0266452	1264.96	-2.49081	0.224599	-11.09	1.40233e-28	1.41264e-27	CTPsyn
FBgn0031489	564.891	3.39683	0.367131	9.25236	2.19594e-20	2.22209e-19	CG17224	X	FBgn0030309	4228.84	3.45228	0.436822	7.90317	2.72e-15	2.65e-14	CG1572	X	FBgn0267519	4734.33	4.82695	0.435744	11.0775	1.61351e-28	1.62369e-27	28SrRNA-Psi:CR45859
FBgn0027607	3456.34	2.70905	0.293231	9.2386	2.49749e-20	2.52461e-19	CG8230	X	FBgn0033610	219.712	5.29182	0.669932	7.89904	2.81e-15	2.74e-14	CG18335	X	FBgn0260943	5352.85	-3.60484	0.325855	-11.0627	1.90279e-28	1.91282e-27	Rbp6
FBgn0032269	569.436	6.89503	0.746427	9.23738	2.52613e-20	2.55092e-19	w-cup	X	FBgn0031562	237.801	6.10984	0.773637	7.89756	2.84e-15	2.77e-14	CG3604	X	FBgn0035761	563.549	-3.06201	0.277073	-11.0513	2.1615e-28	2.17065e-27	RhoGEF4
FBgn0030258	1506.5	-5.41879	0.58679	-9.23463	2.59172e-20	2.61445e-19	CG1552	X	FBgn0038405	202.224	5.78094	0.732244	7.89482	2.91e-15	2.82e-14	CG8927	X	FBgn0038552	1396.51	2.60263	0.235512	11.051	2.16892e-28	2.17585e-27	CG18012
FBgn0259707	1318.92	-5.06681	0.548747	-9.23343	2.62109e-20	2.64136e-19	CG42361	X	FBgn0051051	611.886	-3.90517	0.494652	-7.89478	2.91e-15	2.82e-14	CG31051	X	FBgn0036318	5253.32	2.22474	0.202037	11.0116	3.36158e-28	3.36885e-27	Wbp2
FBgn0024963	1078.74	-2.74125	0.297304	-9.22037	2.96067e-20	2.97742e-19	GluClalpha	X	FBgn0051075	18721.3	3.47762	0.44062	7.89257	2.96e-15	2.87e-14	CG31075	X	FBgn0026077	4636.97	3.34876	0.30423	11.0073	3.52244e-28	3.52643e-27	Gasp
FBgn0039883	1214.52	-4.01455	0.435588	-9.21639	3.0728e-20	3.08701e-19	RhoGAP100F	X	FBgn0262587	292.499	5.01687	0.635693	7.89197	2.97e-15	2.88e-14	CG43124	X	FBgn0015558	986.224	-2.69339	0.244718	-11.0061	3.57275e-28	3.57312e-27	tty
FBgn0036620	178.319	6.03187	0.654539	9.21545	3.09989e-20	3.11103e-19	CG4842	X	FBgn0038694	458.381	4.83581	0.612916	7.88984	3.03e-15	2.93e-14	CG5217	X	FBgn0037616	181.328	6.8523	0.622813	11.0022	3.73017e-28	3.72672e-27	CG8136
FBgn0038402	580.148	-4.59423	0.498792	-9.21072	3.23936e-20	3.24766e-19	Fer2	X	FBgn0263246	142.94	6.04348	0.766054	7.8891	3.04e-15	2.94e-14	CG43389	X	FBgn0259246	1410.14	-2.88046	0.261846	-11.0006	3.79662e-28	3.78923e-27	brp
FBgn0004880	3011.13	-3.43374	0.373063	-9.20419	3.44244e-20	3.44773e-19	scrt	X	FBgn0069969	1524.19	-4.2873	0.543602	-7.88684	3.1e-15	2.99e-14	CG40498	X	FBgn0033249	308.849	-4.2191	0.383755	-10.9942	4.07299e-28	4.06089e-27	CG11191
FBgn0031741	501.041	4.68394	0.508917	9.20375	3.45677e-20	3.45854e-19	CG11034	X	FBgn0016650	188.136	5.58195	0.708913	7.87396	3.44e-15	3.31e-14	Lgr1	X	FBgn0035767	1506.46	3.76199	0.342183	10.9941	4.08052e-28	4.06423e-27	CG8596
FBgn0083975	396.407	-4.39435	0.477617	-9.20057	3.56055e-20	3.55873e-19	Nlg4	X	FBgn0034443	10506.7	4.35877	0.553858	7.86983	3.55e-15	3.42e-14	cer	X	FBgn0035179	627.003	-3.08437	0.280834	-10.9829	4.61812e-28	4.59498e-27	CG12038
FBgn0015831	165.71	6.40885	0.696698	9.19889	3.61656e-20	3.61102e-19	Rtnl2	X	FBgn0004567	790.178	-6.25838	0.795332	-7.86889	3.58e-15	3.44e-14	slp2	X	FBgn0034546	178.158	6.33107	0.577077	10.9709	5.27365e-28	5.24186e-27	CG13442
FBgn0037207	1346.29	-2.94498	0.320234	-9.19636	3.70288e-20	3.69343e-19	Mes2	X	FBgn0265276	13039.4	-3.17066	0.403016	-7.86734	3.62e-15	3.48e-14	l(3)neo38	X	FBgn0086691	2443.85	4.11665	0.37532	10.9684	5.42303e-28	5.38484e-27	UK114
FBgn0004595	29810.5	-3.66308	0.398419	-9.19403	3.78406e-20	3.77056e-19	pros	X	FBgn0020391	1794.71	-4.08375	0.519508	-7.8608	3.82e-15	3.67e-14	Nrk	X	FBgn0044048	1711.73	-4.01767	0.36636	-10.9664	5.54053e-28	5.49591e-27	Ilp5
FBgn0032291	149.541	5.15293	0.560777	9.18892	3.96813e-20	3.94995e-19	CG17118	X	FBgn0040904	166.571	6.17983	0.78783	7.84412	4.36e-15	4.18e-14	CG15577	X	FBgn0000346	938.63	-2.54392	0.232024	-10.9641	5.68878e-28	5.63722e-27	comt
FBgn0037550	735.204	-2.64807	0.288554	-9.17703	4.43151e-20	4.40672e-19	CG9667	X	FBgn0052476	423.408	3.75329	0.478568	7.84275	4.41e-15	4.23e-14	mthl14	X	FBgn0036285	140.231	6.69644	0.611328	10.9539	6.36375e-28	6.29966e-27	toe
FBgn0050456	535.748	5.30991	0.578921	9.17208	4.63971e-20	4.60906e-19	CG30456	X	FBgn0052600	508.962	-3.50835	0.447367	-7.84223	4.43e-15	4.24e-14	dpr8	X	FBgn0034739	277.334	5.86008	0.535028	10.9528	6.43942e-28	6.36809e-27	CG3927
FBgn0032601	784.599	5.84698	0.637773	9.1678	4.82765e-20	4.79089e-19	yellow-b	X	FBgn0053225	143.226	5.94631	0.7587	7.8375	4.6e-15	4.4e-14	CG33225	X	FBgn0039795	710.747	6.28089	0.573599	10.95	6.64686e-28	6.56656e-27	Spn100A
FBgn0085345	119.885	5.27584	0.575619	9.16551	4.93128e-20	4.88877e-19	CG34316	X	FBgn0037684	288.422	5.01711	0.640691	7.83078	4.85e-15	4.63e-14	CG8129	X	FBgn0042101	183.517	5.96383	0.544928	10.9443	7.07874e-28	6.98613e-27	CG18744
FBgn0035964	3958.98	2.35122	0.256577	9.1638	5.00998e-20	4.96176e-19	Dhpr	X	FBgn0011722	921.724	4.01492	0.512771	7.82985	4.88e-15	4.66e-14	Tig	X	FBgn0038820	208.661	8.6105	0.787558	10.9332	8.00121e-28	7.88853e-27	CG4000
FBgn0259736	826.885	3.42108	0.373574	9.15768	5.30226e-20	5.24591e-19	CG42390	X	FBgn0041097	1553.48	-3.36239	0.429887	-7.82156	5.22e-15	4.98e-14	robo3	X	FBgn0025716	3222.63	-2.17243	0.198919	-10.9212	9.12972e-28	8.99204e-27	Bap55
FBgn0030306	7537.06	2.26526	0.247372	9.15733	5.31987e-20	5.25801e-19	Spase25	X	FBgn0013773	97.6863	7.02384	0.89816	7.82026	5.27e-15	5.02e-14	Cyp6a22	X	FBgn0014033	408.407	4.4092	0.40384	10.9182	9.43566e-28	9.28396e-27	Sr-CI
FBgn0034435	634.141	7.0943	0.774763	9.15674	5.34874e-20	5.28121e-19	fest	X	FBgn0033283	213.015	5.02012	0.642633	7.8118	5.64e-15	5.37e-14	CG11635	X	FBgn0033725	53241.4	6.44454	0.590329	10.9169	9.57336e-28	9.40994e-27	Cpr49Ac
FBgn0003449	2601.88	-2.53805	0.277236	-9.15486	5.44273e-20	5.36859e-19	snf	X	FBgn0026176	159.995	5.58825	0.715675	7.80837	5.79e-15	5.5e-14	SkpB	X	FBgn0013720	4396.43	2.64656	0.242431	10.9168	9.58596e-28	9.41282e-27	pck
FBgn0030521	14242.7	2.38532	0.260568	9.15433	5.46951e-20	5.38956e-19	CtsB1	X	FBgn0038761	546.683	3.54006	0.453367	7.80838	5.79e-15	5.5e-14	CG17190	X	FBgn0020415	2521.9	2.11626	0.193974	10.9101	1.03179e-27	1.01213e-26	Idgf2
FBgn0051810	112.859	5.87809	0.642142	9.15389	5.49192e-20	5.40619e-19	CG31810	X	FBgn0033214	666.306	4.74749	0.608024	7.80806	5.81e-15	5.51e-14	CG1941	X	FBgn0262529	250.209	9.2386	0.84808	10.8936	1.23719e-27	1.2124e-26	CG43083
FBgn0053293	194.946	7.26916	0.794367	9.15088	5.64728e-20	5.55353e-19	CG33293	X	FBgn0036756	783.126	5.97754	0.76661	7.79737	6.32e-15	5.99e-14	cln3	X	FBgn0266937	1139.01	-4.12048	0.378405	-10.8891	1.29941e-27	1.27209e-26	CR45388
FBgn0261588	1967.82	-2.49361	0.272513	-9.15041	5.67198e-20	5.57222e-19	pdm3	X	FBgn0013278	571.352	4.25421	0.545819	7.79419	6.48e-15	6.14e-14	Hsp70Bb	X	FBgn0030260	1168.57	-2.76782	0.254198	-10.8885	1.30836e-27	1.27957e-26	CG1537
FBgn0036125	184.98	6.49208	0.70955	9.14957	5.71614e-20	5.60997e-19	CG6279	X	FBgn0020385	781.155	3.76991	0.483938	7.79007	6.7e-15	6.34e-14	pug	X	FBgn0053531	302.017	-3.9708	0.365488	-10.8644	1.70371e-27	1.66454e-26	Ddr
FBgn0085282	413.704	6.49113	0.710001	9.14242	6.10727e-20	5.98782e-19	CG34253	X	FBgn0037553	276.711	5.11833	0.657407	7.78563	6.94e-15	6.56e-14	CG18249	X	FBgn0010295	7609.29	12.0252	1.10765	10.8565	1.85771e-27	1.81318e-26	ng3
FBgn0028554	3520.9	-3.36515	0.368466	-9.13288	6.66992e-20	6.53291e-19	x16	X	FBgn0019650	1644.22	-3.16824	0.407061	-7.78321	7.07e-15	6.68e-14	toy	X	FBgn0037454	176.753	6.96736	0.641849	10.8551	1.88545e-27	1.8384e-26	CG1137
FBgn0015903	1412.03	-2.65571	0.290819	-9.13183	6.73535e-20	6.59039e-19	apt	X	FBgn0000261	20522.5	3.31666	0.426818	7.77067	7.81e-15	7.36e-14	Cat	X	FBgn0002736	3733.62	-2.94657	0.271502	-10.8528	1.93317e-27	1.88305e-26	mago
FBgn0052187	374.149	-4.44695	0.487247	-9.12669	7.06225e-20	6.90335e-19	CG32187	X	FBgn0033128	304.848	4.45283	0.573275	7.76735	8.01e-15	7.55e-14	Tsp42Eg	X	FBgn0002521	1910.95	-2.25807	0.208149	-10.8483	2.03078e-27	1.97615e-26	pho
FBgn0083956	338.142	4.74174	0.520048	9.11787	7.6614e-20	7.48153e-19	CG34120	X	FBgn0051407	233.247	6.07011	0.781575	7.7665	8.07e-15	7.6e-14	CG31407	X	FBgn0033502	1039.01	3.56977	0.329169	10.8448	2.11051e-27	2.05154e-26	CG12910
FBgn0038214	549.513	7.03666	0.772094	9.11374	7.95863e-20	7.76404e-19	CG9616	X	FBgn0028993	4375.83	-4.63985	0.597949	-7.75961	8.52e-15	8.01e-14	scro	X	FBgn0267033	6379.93	-1.94464	0.179316	-10.8447	2.11247e-27	2.05154e-26	mamo
FBgn0031973	303.78	3.11123	0.341383	9.11363	7.96729e-20	7.76474e-19	Spn28Dc	X	FBgn0030040	841.764	5.77183	0.743899	7.75889	8.57e-15	8.05e-14	CG15347	X	FBgn0086711	289.641	3.81748	0.352187	10.8394	2.2405e-27	2.17371e-26	mol
FBgn0267665	673.829	-3.28692	0.360784	-9.1105	8.20014e-20	7.9837e-19	CR46003	X	FBgn0010040	168.235	5.22488	0.673453	7.75834	8.6e-15	8.08e-14	GstD4	X	FBgn0266084	526.688	3.136	0.28943	10.8351	2.34766e-27	2.2754e-26	Fhos
FBgn0037737	815.544	-2.64668	0.290599	-9.10766	8.41802e-20	8.18767e-19	Pnn	X	FBgn0026061	437.998	4.5473	0.58618	7.75752	8.66e-15	8.12e-14	Mipp1	X	FBgn0003089	238.487	5.09527	0.470283	10.8345	2.36343e-27	2.28841e-26	pip
FBgn0001319	810.255	-3.35022	0.368046	-9.10272	8.80935e-20	8.55978e-19	kn	X	FBgn0004839	2805.8	-3.23297	0.41744	-7.74475	9.58e-15	8.97e-14	otk	X	FBgn0039858	32555.8	1.86502	0.172205	10.8302	2.47588e-27	2.39491e-26	CycG
FBgn0033378	3120.06	-2.11127	0.231972	-9.10137	8.92029e-20	8.65897e-19	tsu	X	FBgn0038492	206.492	4.95566	0.641286	7.72769	1.1e-14	1.02e-13	Mur89F	X	FBgn0037517	287.735	9.85093	0.910469	10.8196	2.77917e-27	2.68561e-26	CG10086
FBgn0032652	881.655	6.63355	0.729013	9.09936	9.08617e-20	8.81124e-19	CG6870	X	FBgn0039808	2051.24	-3.28338	0.425031	-7.72503	1.12e-14	1.05e-13	CG12071	X	FBgn0036600	297.702	9.89987	0.915442	10.8143	2.94489e-27	2.84293e-26	CG13043
FBgn0035677	1144.89	-3.81166	0.419026	-9.09649	9.3297e-20	9.03844e-19	CG13293	X	FBgn0051810	113.912	6.79003	0.878999	7.72473	1.12e-14	1.05e-13	CG31810	X	FBgn0259184	163.604	5.46624	0.50557	10.812	3.01903e-27	2.91161e-26	CG42288
FBgn0004047	147.605	5.12985	0.56411	9.09371	9.57196e-20	9.26396e-19	Yp3	X	FBgn0035975	636.008	3.21839	0.416924	7.71936	1.17e-14	1.09e-13	PGRP-LA	X	FBgn0050039	135.51	6.52007	0.603127	10.8105	3.07159e-27	2.95937e-26	CG30039
FBgn0032906	2063.86	-2.74073	0.301472	-9.09113	9.80128e-20	9.47651e-19	RPA2	X	FBgn0032601	1051.44	5.25863	0.681468	7.71663	1.19e-14	1.11e-13	yellow-b	X	FBgn0024361	616.655	7.14044	0.661742	10.7904	3.82269e-27	3.67938e-26	Tsp2A
FBgn0041097	990.547	-2.944	0.323925	-9.08852	1.00394e-19	9.6971e-19	robo3	X	FBgn0028481	1586.35	-5.99992	0.778146	-7.71054	1.25e-14	1.17e-13	CG4341	X	FBgn0052698	874.915	3.12418	0.289537	10.7902	3.82822e-27	3.68107e-26	CG32698
FBgn0086604	459.943	-3.29688	0.362884	-9.08523	1.03482e-19	9.98551e-19	CG12484	X	FBgn0267002	2875.07	-3.41894	0.443728	-7.70503	1.31e-14	1.22e-13	unc-104	X	FBgn0032637	157.68	5.59421	0.518751	10.784	4.09726e-27	3.93587e-26	CG5050
FBgn0033301	171.237	6.79452	0.747933	9.0844	1.04274e-19	1.00521e-18	CG12780	X	FBgn0086358	1089.46	3.27373	0.424953	7.70374	1.32e-14	1.23e-13	Tab2	X	FBgn0034943	244.19	6.74298	0.625506	10.7801	4.2765e-27	4.10401e-26	Fmo-1
FBgn0264308	1214.65	-5.54458	0.610548	-9.08132	1.07269e-19	1.03306e-18	CG43778	X	FBgn0004880	3551.85	-3.54945	0.460918	-7.70082	1.35e-14	1.25e-13	scrt	X	FBgn0036787	680.077	4.45451	0.41364	10.769	4.81969e-27	4.62073e-26	CG4306
FBgn0004619	375.567	-4.80532	0.529401	-9.07689	1.11719e-19	1.07486e-18	GluRIA	X	FBgn0037906	622.407	3.72679	0.483944	7.70087	1.35e-14	1.25e-13	PGRP-LB	X	FBgn0028856	148.952	5.69192	0.528745	10.7649	5.03893e-27	4.82616e-26	CG18063
FBgn0003346	1804.18	-2.41108	0.265677	-9.07522	1.13443e-19	1.09037e-18	RanGAP	X	FBgn0033809	302.532	4.30328	0.558888	7.69971	1.36e-14	1.26e-13	CG4630	X	FBgn0262737	5251.67	-2.05545	0.190957	-10.764	5.09232e-27	4.87251e-26	mub
FBgn0031866	694.874	-3.68873	0.406698	-9.06994	1.19078e-19	1.1434e-18	Nlg2	X	FBgn0038158	92.1208	7.23234	0.939292	7.69979	1.36e-14	1.26e-13	CG14370	X	FBgn0003867	1053.55	2.40108	0.223575	10.7395	6.63999e-27	6.34713e-26	tsl
FBgn0039464	1164.55	-2.58094	0.284929	-9.05819	1.32636e-19	1.27234e-18	CG6330	X	FBgn0039809	283.34	4.44293	0.577198	7.69742	1.39e-14	1.28e-13	CG15547	X	FBgn0004914	1023.89	2.72995	0.254766	10.7156	8.60377e-27	8.21622e-26	Hnf4
FBgn0036262	1114.72	6.30853	0.696496	9.05752	1.33446e-19	1.27799e-18	CG6910	X	FBgn0039611	153.676	6.00655	0.780776	7.69304	1.44e-14	1.33e-13	CG14528	X	FBgn0036652	189.332	7.24258	0.676138	10.7117	8.97075e-27	8.55827e-26	CG13032
FBgn0266347	490.142	-2.93626	0.32418	-9.05749	1.33486e-19	1.27799e-18	nAChRalpha4	X	FBgn0002533	56063.3	9.80562	1.27465	7.69279	1.44e-14	1.33e-13	Lcp2	X	FBgn0035922	456.521	-4.0007	0.373493	-10.7116	8.98035e-27	8.55904e-26	Pex7
FBgn0010109	465.276	-3.40845	0.376394	-9.05554	1.3589e-19	1.29974e-18	dpn	X	FBgn0263088	95.0738	6.97976	0.907659	7.68986	1.47e-14	1.36e-13	CR43356	X	FBgn0038972	320.739	3.80364	0.355204	10.7083	9.30479e-27	8.85958e-26	CG7054
FBgn0040001	452.816	2.97641	0.328705	9.05493	1.36653e-19	1.30575e-18	FASN3	X	FBgn0260768	1468.2	3.72019	0.483819	7.68923	1.48e-14	1.36e-13	CG42566	X	FBgn0041605	4770.25	-3.07424	0.287103	-10.7078	9.35381e-27	8.89755e-26	cpx
FBgn0052459	128.828	6.47541	0.715747	9.04707	1.46854e-19	1.40185e-18	CG32459	X	FBgn0033777	6976.58	3.53763	0.460492	7.68229	1.56e-14	1.44e-13	CG17574	X	FBgn0039239	717.254	6.72083	0.627699	10.7071	9.42873e-27	8.96006e-26	CG13641
FBgn0037137	1529.36	-2.67317	0.295531	-9.04531	1.49238e-19	1.42322e-18	Nopp140	X	FBgn0035574	577.161	3.25477	0.424067	7.67515	1.65e-14	1.52e-13	RhoGEF64C	X	FBgn0038868	1185.99	2.53518	0.236969	10.6983	1.03625e-26	9.83779e-26	CG5862
FBgn0041605	4968.75	-2.68968	0.297462	-9.0421	1.53692e-19	1.46426e-18	cpx	X	FBgn0000024	4571.55	-3.40747	0.444147	-7.67195	1.69e-14	1.56e-13	Ace	X	FBgn0005586	1919.39	-3.36669	0.314722	-10.6973	1.04741e-26	9.93409e-26	Rab3
FBgn0260484	2654.85	-2.50528	0.277212	-9.03743	1.60402e-19	1.52671e-18	HIP	X	FBgn0259685	1255.27	3.14138	0.409753	7.66652	1.77e-14	1.62e-13	crb	X	FBgn0029113	2996.93	-2.2949	0.214809	-10.6834	1.2168e-26	1.15294e-25	Uba2
FBgn0039808	1501.06	-2.78501	0.308303	-9.03335	1.66488e-19	1.58309e-18	CG12071	X	FBgn0028523	1472.84	-3.09129	0.403243	-7.66607	1.77e-14	1.63e-13	CG5888	X	FBgn0037448	201.091	4.5071	0.421937	10.6819	1.23666e-26	1.17061e-25	CG15186
FBgn0004516	1438.26	-3.89836	0.431711	-9.03001	1.71662e-19	1.63071e-18	Gad1	X	FBgn0039486	456.785	5.86468	0.76514	7.66484	1.79e-14	1.64e-13	caix	X	FBgn0034082	250.66	5.07317	0.47496	10.6813	1.24574e-26	1.17807e-25	CG10734
FBgn0000108	4456.18	-3.43583	0.380589	-9.02768	1.75353e-19	1.66415e-18	Appl	X	FBgn0051415	180.839	6.08374	0.793795	7.66411	1.8e-14	1.65e-13	CG31415	X	FBgn0052483	152.262	5.28964	0.495652	10.6721	1.37524e-26	1.29801e-25	CG32483
FBgn0032525	131.23	8.08646	0.896111	9.02395	1.8143e-19	1.72015e-18	Hsp60D	X	FBgn0037064	323.954	4.98961	0.651359	7.66031	1.85e-14	1.7e-13	CG9389	X	FBgn0050069	3099.15	3.19658	0.299658	10.6674	1.44564e-26	1.36313e-25	CG30069
FBgn0033104	1302.1	-2.53144	0.280783	-9.01562	1.95755e-19	1.85417e-18	CG15237	X	FBgn0027600	1579.78	3.51698	0.459274	7.65769	1.89e-14	1.73e-13	obst-B	X	FBgn0043471	248.346	9.6382	0.903756	10.6646	1.49032e-26	1.4039e-25	kappaTry
FBgn0259738	344.436	-3.22792	0.358132	-9.01321	2.00114e-19	1.89363e-18	CG42392	X	FBgn0004595	40381.1	-3.72107	0.486118	-7.65468	1.94e-14	1.77e-13	pros	X	FBgn0032601	898.737	5.71773	0.536288	10.6617	1.53798e-26	1.4474e-25	yellow-b
FBgn0051706	625.725	-4.74343	0.526821	-9.00388	2.17879e-19	2.05974e-18	CG31706	X	FBgn0262148	164.228	5.72213	0.747802	7.65193	1.98e-14	1.8e-13	CR42874	X	FBgn0031347	265.737	5.87507	0.551494	10.653	1.68833e-26	1.58735e-25	CG10869
FBgn0000565	3861.36	2.24099	0.248925	9.00268	2.20266e-19	2.08029e-18	Eip71CD	X	FBgn0086519	308.29	5.94563	0.777396	7.64814	2.04e-14	1.86e-13	Cpr47Eg	X	FBgn0030968	893.778	4.4453	0.417294	10.6527	1.69408e-26	1.59123e-25	CG7322
FBgn0040384	2556.44	2.30548	0.256182	8.99941	2.26936e-19	2.14122e-18	CG32795	X	FBgn0033659	592.702	5.40264	0.706517	7.64687	2.06e-14	1.87e-13	Damm	X	FBgn0031097	1504.73	2.39678	0.225127	10.6464	1.81322e-26	1.70149e-25	obst-A
FBgn0034647	516.978	6.77817	0.753281	8.9982	2.29456e-19	2.16291e-18	pirk	X	FBgn0085337	200.064	6.66358	0.871459	7.64647	2.07e-14	1.88e-13	CG34308	X	FBgn0033926	48341	2.15921	0.202825	10.6457	1.82626e-26	1.71208e-25	Arc1
FBgn0038829	8986.46	3.42181	0.381034	8.98032	2.69991e-19	2.54254e-18	CG17271	X	FBgn0035542	8328.85	3.14122	0.410984	7.64318	2.12e-14	1.92e-13	DOR	X	FBgn0034688	1965.78	3.71358	0.348986	10.6411	1.9193e-26	1.79756e-25	CG11474
FBgn0004432	58513.1	-2.13448	0.237738	-8.97829	2.74997e-19	2.58719e-18	Cyp1	X	FBgn0086675	22213.1	-4.27082	0.558797	-7.64287	2.12e-14	1.93e-13	fne	X	FBgn0037276	166.041	5.98579	0.562535	10.6407	1.92603e-26	1.80213e-25	CG17387
FBgn0085369	412.006	-3.00717	0.335006	-8.97646	2.79617e-19	2.62813e-18	Drgx	X	FBgn0038126	986.083	3.56445	0.466677	7.63792	2.21e-14	2e-13	CG8483	X	FBgn0053319	152.834	7.87987	0.740655	10.6391	1.96092e-26	1.83302e-25	CR33319
FBgn0000715	745.769	-4.18559	0.466433	-8.9736	2.86969e-19	2.69464e-18	FMRFa	X	FBgn0030521	23050.7	2.83672	0.371681	7.63213	2.31e-14	2.09e-13	CtsB1	X	FBgn0050046	412.211	4.82424	0.453981	10.6265	2.24346e-26	2.09511e-25	CG30046
FBgn0015575	451.892	5.42878	0.605277	8.96908	2.98999e-19	2.80491e-18	alpha-Est7	X	FBgn0030029	435.075	3.5363	0.463844	7.62391	2.46e-14	2.23e-13	CG15343	X	FBgn0046113	186.962	5.30457	0.499429	10.6213	2.37312e-26	2.21408e-25	GluRIIC
FBgn0002525	6133.29	-2.04488	0.228199	-8.96096	3.21876e-19	3.01662e-18	Lam	X	FBgn0010041	141.427	5.31339	0.697223	7.62079	2.52e-14	2.28e-13	GstD5	X	FBgn0026061	534.312	4.83298	0.455121	10.6191	2.42844e-26	2.26352e-25	Mipp1
FBgn0013675	163394	-4.07564	0.455184	-8.95383	3.43346e-19	3.21476e-18	COX2	X	FBgn0005586	2197.68	-4.21562	0.553219	-7.62016	2.53e-14	2.29e-13	Rab3	X	FBgn0037207	1087.36	-2.95129	0.27845	-10.599	3.01137e-26	2.80418e-25	Mes2
FBgn0035952	142.048	7.77304	0.86906	8.94419	3.74677e-19	3.50475e-18	CG5280	X	FBgn0000137	870.022	-4.96585	0.6518	-7.61867	2.56e-14	2.31e-13	ase	X	FBgn0039801	191.278	7.01429	0.662061	10.5946	3.15547e-26	2.93556e-25	Npc2h
FBgn0039858	27083.1	2.17705	0.243441	8.94285	3.79259e-19	3.54422e-18	CycG	X	FBgn0265296	3543.55	-3.73241	0.489993	-7.61727	2.59e-14	2.33e-13	Dscam2	X	FBgn0000422	4098.67	2.96659	0.280083	10.5918	3.25139e-26	3.0219e-25	Ddc
FBgn0031682	1238.02	2.86812	0.320982	8.93545	4.05518e-19	3.786e-18	CG5828	X	FBgn0053196	3680.96	4.42508	0.581304	7.61235	2.69e-14	2.42e-13	dpy	X	FBgn0039617	200.379	-4.76964	0.450353	-10.5909	3.28489e-26	3.05012e-25	DIP-gamma
FBgn0039617	220.211	-4.13407	0.462689	-8.93487	4.07653e-19	3.80229e-18	DIP-gamma	X	FBgn0040505	1768.11	-3.94841	0.51937	-7.60231	2.91e-14	2.62e-13	Alk	X	FBgn0036622	477.285	7.2279	0.682505	10.5903	3.30706e-26	3.06778e-25	CG4753
FBgn0020391	1063.1	-2.89659	0.324326	-8.93109	4.21835e-19	3.93082e-18	Nrk	X	FBgn0000565	4976.14	2.82306	0.371516	7.59875	2.99e-14	2.68e-13	Eip71CD	X	FBgn0038088	1428.18	2.5955	0.245229	10.584	3.53486e-26	3.27597e-25	CG10126
FBgn0028855	3664.54	5.67239	0.635181	8.93035	4.24661e-19	3.95339e-18	CG15282	X	FBgn0011239	116.588	6.66492	0.877112	7.59871	2.99e-14	2.68e-13	ms(2)35Ci	X	FBgn0031360	1488.9	2.41868	0.22857	10.5818	3.61998e-26	3.35167e-25	CG31937
FBgn0033610	153.017	5.49503	0.615641	8.92572	4.42818e-19	4.1185e-18	CG18335	X	FBgn0038342	148.977	5.11414	0.673079	7.59813	3e-14	2.69e-13	B9d1	X	FBgn0037556	2230.76	-2.57989	0.243875	-10.5788	3.73875e-26	3.45834e-25	CG9636
FBgn0029750	320.88	5.41694	0.607127	8.92226	4.56883e-19	4.24528e-18	CG3323	X	FBgn0038975	1028.85	-3.73254	0.49139	-7.59588	3.06e-14	2.74e-13	Nrx-1	X	FBgn0027601	5420.56	3.11983	0.295314	10.5645	4.35464e-26	4.02421e-25	pdgy
FBgn0034612	291.279	7.43769	0.833826	8.91995	4.66517e-19	4.33068e-18	CG10505	X	FBgn0037217	348.868	3.74215	0.493128	7.58861	3.23e-14	2.89e-13	CG14636	X	FBgn0045842	518.184	3.03908	0.287792	10.56	4.56764e-26	4.21309e-25	yuri
FBgn0035189	767.271	3.02773	0.339585	8.91599	4.83484e-19	4.48392e-18	CG9119	X	FBgn0054056	556.525	3.55474	0.468531	7.58698	3.27e-14	2.93e-13	CG34056	X	FBgn0267520	199.35	5.83614	0.552666	10.56	4.56768e-26	4.21309e-25	28SrRNA-Psi:CR45860
FBgn0000416	19195.5	2.64291	0.296451	8.91517	4.87066e-19	4.51287e-18	Sap-r	X	FBgn0031626	183.645	5.39329	0.711032	7.58516	3.32e-14	2.97e-13	CG15631	X	FBgn0010258	200.455	4.19007	0.396826	10.559	4.61713e-26	4.25467e-25	Rbp4
FBgn0028481	1236.78	-4.37228	0.490449	-8.91486	4.88413e-19	4.52106e-18	CG4341	X	FBgn0036441	119.967	5.95818	0.785755	7.58274	3.38e-14	3.02e-13	CG13476	X	FBgn0025878	1754.52	-3.84514	0.364429	-10.5511	5.0181e-26	4.61979e-25	wrapper
FBgn0264383	131.206	7.11174	0.798166	8.9101	5.09854e-19	4.71507e-18	CR43835	X	FBgn0085360	643.345	4.8124	0.634666	7.58257	3.39e-14	3.02e-13	CG34331	X	FBgn0037009	2697.14	2.53468	0.240338	10.5463	5.2822e-26	4.85833e-25	CG5104
FBgn0032900	593.859	3.26999	0.367206	8.90506	5.33591e-19	4.92991e-18	CG14401	X	FBgn0036183	196.687	5.02968	0.663406	7.58161	3.41e-14	3.04e-13	CG6083	X	FBgn0015625	1755.61	-2.09947	0.199188	-10.5402	5.64008e-26	5.18259e-25	CycB3
FBgn0262477	1043.02	-3.76139	0.422847	-8.89539	5.8212e-19	5.3732e-18	FoxP	X	FBgn0036837	3670.17	2.82955	0.373216	7.58154	3.41e-14	3.04e-13	CG18135	X	FBgn0265191	1631.78	2.95982	0.280888	10.5374	5.81022e-26	5.33389e-25	Glycogenin
FBgn0031108	144.932	8.22871	0.925418	8.89188	6.0081e-19	5.54049e-18	CG15459	X	FBgn0038598	611.43	3.90192	0.514654	7.58164	3.41e-14	3.04e-13	CG7131	X	FBgn0033301	167.464	6.84521	0.649912	10.5325	6.11702e-26	5.61025e-25	CG12780
FBgn0021800	2345.62	-3.21145	0.361466	-8.88451	6.42012e-19	5.91486e-18	Reph	X	FBgn0040658	322.594	4.26201	0.562807	7.57278	3.65e-14	3.24e-13	CG13516	X	FBgn0011288	1781.63	-3.85747	0.36639	-10.5283	6.39754e-26	5.862e-25	Snap25
FBgn0036550	564.888	3.69197	0.415567	8.88416	6.44081e-19	5.92833e-18	CG17026	X	FBgn0030846	198.997	4.06836	0.537355	7.57109	3.7e-14	3.28e-13	CG12992	X	FBgn0028400	2691.47	-4.41757	0.419891	-10.5208	6.93095e-26	6.34478e-25	Syt4
FBgn0031842	1574.35	2.25593	0.254017	8.88102	6.62522e-19	6.09233e-18	Tango1	X	FBgn0085413	560.462	-4.08979	0.540281	-7.56975	3.74e-14	3.31e-13	CG34384	X	FBgn0051266	250.082	9.23706	0.878729	10.5118	7.61913e-26	6.96821e-25	CG31266
FBgn0261804	352.066	-4.03275	0.454104	-8.88067	6.64581e-19	6.10552e-18	CG42750	X	FBgn0046873	108.145	7.77834	1.02837	7.56375	3.92e-14	3.47e-13	Pif2	X	FBgn0037370	3020.17	2.44827	0.233065	10.5047	8.22108e-26	7.51167e-25	CG1236
FBgn0035975	522.178	3.63647	0.409527	8.87969	6.70484e-19	6.15397e-18	PGRP-LA	X	FBgn0030396	1154.83	3.25906	0.430934	7.56276	3.95e-14	3.49e-13	CG2556	X	FBgn0038921	174.012	5.90603	0.562712	10.4956	9.046e-26	8.25765e-25	CG6332
FBgn0004654	1236.04	2.67486	0.301772	8.86385	7.72995e-19	7.08821e-18	Pgd	X	FBgn0035501	1264.38	3.10493	0.410882	7.55675	4.13e-14	3.65e-13	CG1299	X	FBgn0003447	3854.15	-2.61858	0.249551	-10.4932	9.28498e-26	8.46786e-25	sn
FBgn0033968	2205.87	5.78086	0.652593	8.8583	8.12472e-19	7.44322e-18	hui	X	FBgn0261858	89.1439	6.32742	0.8384	7.54702	4.45e-14	3.93e-13	CG42787	X	FBgn0051636	506.025	6.40727	0.610715	10.4914	9.45985e-26	8.61927e-25	CG31636
FBgn0032376	126.507	5.9667	0.674481	8.84636	9.04182e-19	8.27563e-18	Tsp33B	X	FBgn0086917	6036.07	-3.79562	0.503009	-7.54583	4.49e-14	3.97e-13	spok	X	FBgn0010395	141.814	5.89804	0.562474	10.4859	1.00281e-25	9.12848e-25	Itgbn
FBgn0051390	1236.28	-2.44507	0.276417	-8.8456	9.10395e-19	8.32471e-18	MED7	X	FBgn0033344	177.912	6.34608	0.841134	7.54467	4.53e-14	4e-13	CG8252	X	FBgn0039064	1042.73	-5.12241	0.488529	-10.4854	1.0085e-25	9.17166e-25	CG4467
FBgn0039632	2363.63	2.29545	0.259626	8.84137	9.45534e-19	8.63794e-18	Cul5	X	FBgn0259196	156.844	5.67659	0.752559	7.54305	4.59e-14	4.04e-13	CG42300	X	FBgn0000633	1059.39	-3.00069	0.286198	-10.4847	1.01608e-25	9.23196e-25	fas
FBgn0038498	509.837	-3.19273	0.361232	-8.83846	9.70438e-19	8.85717e-18	beat-IIa	X	FBgn0270928	1183.08	-4.31857	0.572817	-7.53917	4.73e-14	4.16e-13	VAChT	X	FBgn0027607	4165.98	2.38988	0.22813	10.4759	1.11428e-25	1.01147e-24	CG8230
FBgn0023495	312.097	6.63512	0.751304	8.83147	1.03307e-18	9.42e-18	Lip3	X	FBgn0022987	1777.64	-2.89675	0.384237	-7.53898	4.74e-14	4.16e-13	qkr54B	X	FBgn0053099	341.784	4.26415	0.407369	10.4675	1.21785e-25	1.10446e-24	CG33099
FBgn0036947	145.662	7.47278	0.84691	8.82358	1.10858e-18	1.00991e-17	obst-F	X	FBgn0052119	181.567	6.54053	0.868088	7.5344	4.91e-14	4.31e-13	CG32119	X	FBgn0032943	1690.49	-2.56523	0.245078	-10.467	1.2242e-25	1.10919e-24	Tsp39D
FBgn0086677	1335.44	-4.17998	0.473788	-8.82248	1.11956e-18	1.01896e-17	jeb	X	FBgn0037060	835.707	-4.29415	0.570243	-7.5304	5.06e-14	4.44e-13	CG10508	X	FBgn0027499	1623.74	-2.04361	0.19525	-10.4666	1.22955e-25	1.113e-24	wde
FBgn0029924	811.523	2.69807	0.306023	8.81657	1.18023e-18	1.07319e-17	CG4586	X	FBgn0031347	212.831	4.73451	0.62873	7.53027	5.06e-14	4.44e-13	CG10869	X	FBgn0031294	7928.53	-2.94596	0.281516	-10.4646	1.25609e-25	1.13597e-24	IA-2
FBgn0028983	2513.37	3.12532	0.354488	8.81642	1.1818e-18	1.07362e-17	Spn55B	X	FBgn0031468	198.984	5.75747	0.765256	7.52359	5.33e-14	4.66e-13	CG2975	X	FBgn0032129	672.608	4.34912	0.415721	10.4616	1.29602e-25	1.17099e-24	jp
FBgn0050069	3024.09	3.19545	0.362478	8.81556	1.19089e-18	1.08087e-17	CG30069	X	FBgn0037512	92.0744	6.6882	0.888956	7.52366	5.33e-14	4.66e-13	CG2616	X	FBgn0030798	356.646	5.00226	0.478346	10.4574	1.35509e-25	1.22322e-24	CG13003
FBgn0264922	34642.2	-2.33688	0.265134	-8.81394	1.20821e-18	1.09557e-17	smt3	X	FBgn0037239	4014.59	3.08717	0.410769	7.51558	5.67e-14	4.95e-13	CG11739	X	FBgn0036416	14949.3	10.1129	0.967099	10.457	1.36117e-25	1.22757e-24	CG7924
FBgn0266421	2950.12	-3.06143	0.347417	-8.81196	1.22973e-18	1.11405e-17	RPA3	X	FBgn0262568	107.743	5.20917	0.693251	7.51412	5.73e-14	5e-13	CG43108	X	FBgn0029750	230.688	4.471	0.427729	10.4529	1.4211e-25	1.28044e-24	CG3323
FBgn0052311	2729.06	3.49287	0.396486	8.80958	1.25611e-18	1.1369e-17	zormin	X	FBgn0034356	1767.3	3.27842	0.436504	7.51065	5.88e-14	5.13e-13	CG10924	X	FBgn0085261	2156.68	2.60824	0.249575	10.4508	1.45369e-25	1.30859e-24	CG34232
FBgn0031769	7891.47	-2.58124	0.293243	-8.80239	1.3393e-18	1.20995e-17	CG9135	X	FBgn0260653	5800.83	3.78952	0.504878	7.50581	6.1e-14	5.32e-13	serp	X	FBgn0260461	263.683	6.11187	0.585028	10.4471	1.51035e-25	1.35833e-24	Rcd7
FBgn0039911	499.447	-3.32955	0.378255	-8.80239	1.33929e-18	1.20995e-17	CG1909	X	FBgn0034583	5130.91	2.86259	0.381412	7.50525	6.13e-14	5.34e-13	CG10527	X	FBgn0035370	7253.35	-2.11546	0.202622	-10.4404	1.6209e-25	1.45642e-24	Non2
FBgn0027341	2301.48	4.15896	0.47305	8.79181	1.47172e-18	1.32835e-17	Gfat1	X	FBgn0038420	1269.35	3.83718	0.511383	7.50353	6.21e-14	5.4e-13	CG10311	X	FBgn0031257	589.111	-4.18233	0.400638	-10.4392	1.64242e-25	1.47439e-24	CG4133
FBgn0013676	180498	-3.27088	0.372119	-8.78989	1.4971e-18	1.35002e-17	COX3	X	FBgn0032253	364.344	4.37385	0.582919	7.50337	6.22e-14	5.41e-13	LManI	X	FBgn0029826	488.429	2.8567	0.273893	10.43	1.80865e-25	1.62212e-24	CG6041
FBgn0027660	982.672	2.5881	0.294532	8.78717	1.53371e-18	1.38176e-17	blot	X	FBgn0011705	2152.73	-3.41702	0.455668	-7.49893	6.43e-14	5.59e-13	rost	X	FBgn0029866	365.756	3.72397	0.357432	10.4187	2.03723e-25	1.82544e-24	CG3842
FBgn0036789	818.092	-3.88506	0.442215	-8.78546	1.55721e-18	1.40163e-17	AstC-R2	X	FBgn0043806	3779.07	-3.05373	0.407779	-7.48869	6.96e-14	6.04e-13	CG32032	X	FBgn0031542	604.15	6.5049	0.624371	10.4183	2.04547e-25	1.83114e-24	CG15414
FBgn0261975	1951.14	-2.5178	0.286593	-8.7853	1.55946e-18	1.40237e-17	CG42806	X	FBgn0260995	1256.02	-4.1821	0.558847	-7.48345	7.24e-14	6.28e-13	dpr21	X	FBgn0015808	3994.78	2.51001	0.240958	10.4168	2.07824e-25	1.85877e-24	ScpX
FBgn0260768	593.31	4.05146	0.461342	8.78191	1.60717e-18	1.44394e-17	CG42566	X	FBgn0008636	720.859	-3.70604	0.49586	-7.47398	7.78e-14	6.74e-13	hbn	X	FBgn0032770	214.219	5.97144	0.573772	10.4073	2.29576e-25	2.05143e-24	CG13086
FBgn0262515	13157.1	2.6282	0.299399	8.77826	1.66022e-18	1.49024e-17	VhaAC45	X	FBgn0037690	670.737	-3.55259	0.475437	-7.47227	7.88e-14	6.82e-13	Task7	X	FBgn0031849	170.851	8.66559	0.832918	10.4039	2.37985e-25	2.12461e-24	CG11327
FBgn0030244	146.673	5.7693	0.657261	8.7778	1.66705e-18	1.49499e-17	CG2157	X	FBgn0026077	5927.91	3.07087	0.411103	7.46985	8.03e-14	6.94e-13	Gasp	X	FBgn0039109	1125.05	3.45676	0.332907	10.3836	2.94547e-25	2.62716e-24	CG10365
FBgn0260943	6405.07	-3.137	0.357557	-8.77343	1.73308e-18	1.55279e-17	Rbp6	X	FBgn0032233	1021.28	-3.30504	0.442839	-7.4633	8.44e-14	7.29e-13	dpr19	X	FBgn0035903	476.201	-3.67281	0.353864	-10.3791	3.08524e-25	2.74931e-24	CG6765
FBgn0005411	2768.87	-2.12325	0.242051	-8.77194	1.75617e-18	1.57203e-17	U2af50	X	FBgn0031702	1014.07	3.19021	0.427895	7.45558	8.95e-14	7.72e-13	fusl	X	FBgn0032713	1908.05	3.26589	0.314771	10.3754	3.20725e-25	2.85542e-24	CG17323
FBgn0039054	1594.49	-3.09783	0.353201	-8.77071	1.77537e-18	1.58776e-17	Cow	X	FBgn0034543	3283.02	2.76701	0.371306	7.4521	9.19e-14	7.92e-13	galla-1	X	FBgn0038828	588.037	-2.73762	0.26403	-10.3686	3.4456e-25	3.06482e-24	CG17270
FBgn0030304	1156.92	-4.02292	0.458877	-8.76688	1.83685e-18	1.64124e-17	Cyp4g15	X	FBgn0262483	974.323	-3.06883	0.412156	-7.4458	9.64e-14	8.3e-13	Rbp	X	FBgn0025624	1697.58	2.10135	0.202737	10.3649	3.58056e-25	3.18076e-24	CG4025
FBgn0038207	177.159	5.49114	0.626624	8.76305	1.9003e-18	1.69639e-17	CG14356	X	FBgn0038795	112.063	7.50728	1.00839	7.44479	9.71e-14	8.36e-13	CG4335	X	FBgn0025720	1204.03	2.32785	0.22459	10.3649	3.58248e-25	3.18076e-24	Ate1
FBgn0259241	415.144	-4.47818	0.511048	-8.76274	1.90563e-18	1.69959e-17	CG42339	X	FBgn0024836	1485.3	-3.13824	0.42206	-7.43553	1.04e-13	8.95e-13	stan	X	FBgn0000721	1103.51	2.37626	0.22927	10.3645	3.5972e-25	3.19091e-24	for
FBgn0027611	2708.53	2.66011	0.303624	8.76122	1.93149e-18	1.72108e-17	LManII	X	FBgn0033402	1312.38	2.88114	0.387513	7.43496	1.05e-13	8.98e-13	Myd88	X	FBgn0024244	759.909	3.08827	0.298107	10.3596	3.78544e-25	3.35484e-24	drm
FBgn0259740	3563.62	-3.1429	0.35929	-8.74754	2.18051e-18	1.94121e-17	CG42394	X	FBgn0030306	12340.8	2.82404	0.380113	7.42948	1.09e-13	9.36e-13	Spase25	X	FBgn0001994	3522.9	-2.36724	0.228738	-10.3491	4.22304e-25	3.73926e-24	crp
FBgn0029147	264.503	4.12947	0.472483	8.73994	2.3323e-18	2.07446e-17	NtR	X	FBgn0046253	726.618	4.76385	0.641338	7.42799	1.1e-13	9.45e-13	CG3502	X	FBgn0016123	651.234	2.86513	0.276984	10.344	4.45426e-25	3.9404e-24	Alp4
FBgn0015380	2469.94	-2.31117	0.264474	-8.73872	2.35773e-18	2.09516e-17	drl	X	FBgn0050069	3283.76	3.37424	0.454263	7.42795	1.1e-13	9.45e-13	CG30069	X	FBgn0035040	307.109	4.48662	0.433966	10.3386	4.71183e-25	4.16447e-24	CG4741
FBgn0001227	1563.49	-4.42297	0.506162	-8.73825	2.36742e-18	2.10187e-17	Hsp67Ba	X	FBgn0036551	1082.75	3.86138	0.519947	7.42649	1.12e-13	9.54e-13	CG17029	X	FBgn0030614	160.342	7.74978	0.750011	10.3329	5.00294e-25	4.41775e-24	CG9072
FBgn0029079	3031.17	-3.22807	0.369609	-8.73376	2.46346e-18	2.18515e-17	icln	X	FBgn0034532	243.19	4.53936	0.611518	7.42311	1.14e-13	9.78e-13	CG13436	X	FBgn0264502	828.35	-3.66482	0.354682	-10.3327	5.01372e-25	4.42326e-24	CG43901
FBgn0028697	39382	-2.46093	0.281858	-8.73111	2.5218e-18	2.23487e-17	RpL15	X	FBgn0033521	100.187	6.87315	0.926504	7.41837	1.19e-13	1.01e-12	CG12896	X	FBgn0027287	749.171	2.91609	0.282303	10.3297	5.1739e-25	4.56044e-24	Gmap
FBgn0000057	903.582	2.50329	0.286724	8.73064	2.53227e-18	2.24211e-17	adp	X	FBgn0026403	283.014	4.36906	0.590105	7.40387	1.32e-13	1.13e-12	Ndg	X	FBgn0032282	551.627	6.96279	0.674181	10.3278	5.27661e-25	4.64676e-24	CG7299
FBgn0062961	218.057	5.03001	0.576934	8.71853	2.81845e-18	2.49325e-17	pncr016:2R	X	FBgn0053513	494.836	-4.21133	0.568815	-7.40369	1.32e-13	1.13e-12	Nmdar2	X	FBgn0000404	2155.14	-2.69901	0.261379	-10.326	5.3729e-25	4.72728e-24	CycA
FBgn0016075	721.865	2.57863	0.295843	8.71619	2.8771e-18	2.54282e-17	vkg	X	FBgn0028408	839.012	-3.37196	0.455563	-7.40175	1.34e-13	1.14e-12	Drep2	X	FBgn0037067	378.427	5.15835	0.499656	10.3238	5.5005e-25	4.83518e-24	Cpr78Ca
FBgn0052107	138.458	4.59847	0.527995	8.70931	3.05732e-18	2.69967e-17	CG32107	X	FBgn0034639	284.691	3.93896	0.53256	7.39628	1.4e-13	1.19e-12	CG15673	X	FBgn0010014	3980.18	-4.23163	0.410425	-10.3104	6.32679e-25	5.55649e-24	CanB
FBgn0261514	641.654	-3.88377	0.446253	-8.70308	3.2301e-18	2.84966e-17	NimA	X	FBgn0031914	1350.26	3.46281	0.468388	7.39303	1.44e-13	1.22e-12	CG5973	X	FBgn0034436	1910.77	2.06607	0.200502	10.3045	6.72538e-25	5.90123e-24	CG11961
FBgn0266521	8454.51	-2.76842	0.318123	-8.70237	3.25026e-18	2.86486e-17	stai	X	FBgn0265041	149.004	6.0512	0.819369	7.38519	1.52e-13	1.29e-12	CG44158	X	FBgn0027580	4353.03	2.46301	0.239107	10.3009	6.98358e-25	6.12228e-24	PCB
FBgn0085409	3016.85	-3.23228	0.371623	-8.69773	3.38575e-18	2.98159e-17	smal	X	FBgn0035844	1664.13	4.07603	0.552271	7.3805	1.58e-13	1.34e-12	CG13676	X	FBgn0030294	1509.06	-2.77325	0.269506	-10.2901	7.80893e-25	6.83967e-24	Pa1
FBgn0038868	1067.71	2.40769	0.277043	8.69065	3.60382e-18	3.17077e-17	CG5862	X	FBgn0266095	2176.26	-4.06558	0.551105	-7.37715	1.62e-13	1.37e-12	CR44832	X	FBgn0259229	314.289	4.67274	0.454253	10.2866	8.09538e-25	7.08419e-24	CG42329
FBgn0033725	60296.3	6.90833	0.795564	8.68356	3.83578e-18	3.37183e-17	Cpr49Ac	X	FBgn0039881	253.861	4.18264	0.567106	7.37542	1.64e-13	1.39e-12	CG1971	X	FBgn0010504	1037.44	3.02544	0.29429	10.2805	8.63099e-25	7.54414e-24	kermit
FBgn0261279	2217.58	2.21963	0.255627	8.68308	3.8521e-18	3.38313e-17	lqfR	X	FBgn0029766	13752.4	3.7517	0.508708	7.37496	1.64e-13	1.39e-12	CG15784	X	FBgn0038547	929.195	-4.12238	0.400994	-10.2804	8.6365e-25	7.54414e-24	CG17803
FBgn0264347	309.377	4.81066	0.554809	8.67085	4.28902e-18	3.76348e-17	CR43803	X	FBgn0032021	4510.76	-3.26164	0.44247	-7.37146	1.69e-13	1.43e-12	CG7781	X	FBgn0050456	494.619	5.15122	0.501734	10.2668	9.9414e-25	8.67621e-24	CG30456
FBgn0028622	1351.71	2.75077	0.317366	8.6675	4.41692e-18	3.87224e-17	qsm	X	FBgn0037163	138.897	5.10516	0.692731	7.36962	1.71e-13	1.45e-12	laza	X	FBgn0013763	13818.7	3.33266	0.325022	10.2536	1.13997e-24	9.94005e-24	Idgf6
FBgn0037130	868.699	-3.98435	0.459731	-8.66671	4.44788e-18	3.89588e-17	Syn1	X	FBgn0031813	1444.84	2.68681	0.365013	7.36086	1.83e-13	1.54e-12	CG9527	X	FBgn0264344	111.609	6.39976	0.624219	10.2524	1.15424e-24	1.00554e-23	CG43800
FBgn0040505	1754.59	-3.51151	0.405385	-8.66215	4.62933e-18	4.05118e-17	Alk	X	FBgn0023507	1237.61	4.3495	0.591485	7.35352	1.93e-13	1.63e-12	D2hgdh	X	FBgn0262477	732.102	-3.96839	0.387161	-10.25	1.1837e-24	1.03029e-23	FoxP
FBgn0004244	1790.86	-2.78334	0.321409	-8.65982	4.72498e-18	4.13119e-17	Rdl	X	FBgn0033543	995.08	2.83508	0.385855	7.34752	2.02e-13	1.7e-12	CG12338	X	FBgn0051907	137.224	7.79494	0.760641	10.2479	1.20997e-24	1.05221e-23	CG31907
FBgn0033051	395.726	3.56839	0.412472	8.65122	5.09501e-18	4.45074e-17	Strica	X	FBgn0039722	1703.99	-3.70622	0.504492	-7.34645	2.04e-13	1.71e-12	Capa	X	FBgn0264789	166.489	4.4157	0.431019	10.2448	1.24899e-24	1.08518e-23	CR44019
FBgn0010651	1786.77	2.99789	0.346577	8.65001	5.14929e-18	4.49414e-17	MFS14	X	FBgn0039282	756.475	-4.92325	0.670221	-7.34571	2.05e-13	1.72e-12	Bili	X	FBgn0033683	1392.9	2.30527	0.225046	10.2436	1.26475e-24	1.09788e-23	CG18343
FBgn0053653	2662.64	-2.42114	0.279937	-8.64889	5.20009e-18	4.53442e-17	Cadps	X	FBgn0033791	580.704	-4.77027	0.649486	-7.34468	2.06e-13	1.73e-12	Drl-2	X	FBgn0033063	197.508	6.09449	0.595014	10.2426	1.27759e-24	1.10804e-23	CG14589
FBgn0000039	720.078	-3.3414	0.386592	-8.64321	5.46551e-18	4.76162e-17	nAChRalpha2	X	FBgn0035719	758.465	-3.30231	0.449645	-7.34425	2.07e-13	1.74e-12	tow	X	FBgn0052137	474.87	3.5562	0.347391	10.2369	1.35543e-24	1.1745e-23	CG32137
FBgn0035491	196.165	7.38132	0.854221	8.641	5.57216e-18	4.85021e-17	Dpy-30L2	X	FBgn0015831	172.67	5.03826	0.686237	7.34186	2.11e-13	1.77e-12	Rtnl2	X	FBgn0035481	993.514	-2.42562	0.237343	-10.2199	1.61489e-24	1.39808e-23	CG12605
FBgn0035538	535.754	-3.74421	0.433513	-8.63691	5.77538e-18	5.02263e-17	DopEcR	X	FBgn0029091	87.0269	7.1448	0.973413	7.33995	2.14e-13	1.79e-12	CS-2	X	FBgn0001122	6346.28	-3.04862	0.298363	-10.2178	1.65e-24	1.42721e-23	Galphao
FBgn0036769	866.577	4.45212	0.515525	8.6361	5.8167e-18	5.05407e-17	Tsp74F	X	FBgn0031322	1126.92	3.54351	0.482765	7.34004	2.14e-13	1.79e-12	CG5001	X	FBgn0031548	163.133	5.91783	0.579375	10.2142	1.71344e-24	1.48077e-23	CG8852
FBgn0052227	1164.32	-2.79279	0.323528	-8.63229	6.01339e-18	5.22033e-17	gogo	X	FBgn0026439	2571.31	-3.25201	0.443084	-7.3395	2.14e-13	1.79e-12	Eaat1	X	FBgn0261287	411.954	4.30579	0.421622	10.2124	1.7441e-24	1.50593e-23	ymp
FBgn0000667	5567.87	2.18834	0.25373	8.62469	6.42659e-18	5.57409e-17	Actn	X	FBgn0013684	18366.5	-3.84399	0.523907	-7.33716	2.18e-13	1.82e-12	ND5	X	FBgn0037298	4263.88	2.48108	0.243112	10.2055	1.87348e-24	1.61621e-23	CG2604
FBgn0027348	265.58	5.54219	0.642715	8.62308	6.51769e-18	5.64808e-17	bgm	X	FBgn0259222	656.575	-3.12809	0.426635	-7.33202	2.27e-13	1.89e-12	CG42322	X	FBgn0058178	2734.46	-2.25087	0.22075	-10.1965	2.0564e-24	1.77244e-23	CG40178
FBgn0026239	1682.13	-2.34962	0.27254	-8.6212	6.62577e-18	5.73666e-17	gukh	X	FBgn0030710	800.178	-3.15129	0.430181	-7.32549	2.38e-13	1.98e-12	CG8924	X	FBgn0030029	335.754	3.34596	0.328234	10.1938	2.11284e-24	1.81947e-23	CG15343
FBgn0052436	246.257	5.77	0.669469	8.61876	6.76827e-18	5.85485e-17	CG32436	X	FBgn0026239	2005.34	-2.87308	0.392343	-7.32287	2.43e-13	2.02e-12	gukh	X	FBgn0029975	1757.83	-2.74993	0.26984	-10.191	2.17624e-24	1.87242e-23	spidey
FBgn0261989	2046.69	5.66809	0.657945	8.61484	7.00414e-18	6.05354e-17	CG42807	X	FBgn0267073	232.01	4.45613	0.608543	7.32262	2.43e-13	2.02e-12	CR45517	X	FBgn0032549	250.038	6.7253	0.660045	10.1892	2.21657e-24	1.90542e-23	CG4650
FBgn0037116	786.661	2.65788	0.308868	8.60522	7.61677e-18	6.5772e-17	Als2	X	FBgn0030120	101.03	5.85082	0.799253	7.32036	2.47e-13	2.06e-12	CG17440	X	FBgn0052026	179.06	3.76942	0.370215	10.1817	2.39342e-24	2.05563e-23	CG32026
FBgn0034142	1714.85	2.26796	0.263619	8.60319	7.75322e-18	6.68912e-17	CG8306	X	FBgn0016061	890.465	-4.12504	0.563636	-7.31862	2.51e-13	2.08e-12	side	X	FBgn0038122	114.123	6.67018	0.655205	10.1803	2.42816e-24	2.08364e-23	CG8138
FBgn0265137	1192.57	2.1406	0.249071	8.59433	8.37509e-18	7.21927e-17	Spn42Da	X	FBgn0011259	3053.44	-3.30425	0.451832	-7.31301	2.61e-13	2.17e-12	Sema1a	X	FBgn0032869	232.364	4.59191	0.451093	10.1795	2.44778e-24	2.09862e-23	CG17470
FBgn0013981	73792.5	-3.02745	0.352351	-8.59216	8.53477e-18	7.35043e-17	His4r	X	FBgn0031526	188.227	6.43718	0.88036	7.31199	2.63e-13	2.18e-12	CG8838	X	FBgn0051810	149.385	5.73458	0.563476	10.1771	2.50806e-24	2.14841e-23	CG31810
FBgn0000404	2466.09	-2.055	0.239553	-8.57849	9.613e-18	8.27175e-17	CycA	X	FBgn0027341	3453.35	4.066	0.556844	7.30186	2.84e-13	2.35e-12	Gfat1	X	FBgn0042179	196.827	6.08792	0.598323	10.175	2.56483e-24	2.19511e-23	CG18869
FBgn0037664	360.747	2.85277	0.332949	8.56819	1.05123e-17	9.03762e-17	CG8420	X	FBgn0051204	87.0215	5.98516	0.820266	7.29661	2.95e-13	2.44e-12	CG31204	X	FBgn0028481	1071.73	-3.30084	0.324838	-10.1615	2.94488e-24	2.51816e-23	CG4341
FBgn0038934	430.528	3.56163	0.415794	8.56586	1.07274e-17	9.21444e-17	Gld2	X	FBgn0021800	3356.15	-3.61217	0.495326	-7.29251	3.04e-13	2.52e-12	Reph	X	FBgn0033888	213.407	6.29337	0.61964	10.1565	3.10049e-24	2.64889e-23	CG18568
FBgn0085391	2628.91	-3.7771	0.441122	-8.56249	1.10456e-17	9.47943e-17	trv	X	FBgn0051921	267.949	3.5343	0.484724	7.29137	3.07e-13	2.54e-12	CG31921	X	FBgn0038243	1154.17	2.36974	0.233403	10.153	3.21372e-24	2.74322e-23	CG8066
FBgn0032467	2814.29	2.27014	0.265513	8.55001	1.2308e-17	1.05536e-16	CG9934	X	FBgn0030658	4473.7	3.10291	0.426008	7.28369	3.25e-13	2.68e-12	CG7872	X	FBgn0083975	215.094	-4.3887	0.432523	-10.1468	3.42549e-24	2.91886e-23	Nlg4
FBgn0003330	830.255	-2.30296	0.269367	-8.5495	1.23619e-17	1.05905e-16	Sce	X	FBgn0264794	529.431	-4.24257	0.582812	-7.27948	3.35e-13	2.76e-12	CR44024	X	FBgn0040732	2909.81	6.17465	0.608636	10.1451	3.48541e-24	2.96732e-23	CG16926
FBgn0031375	800.447	-3.28671	0.38462	-8.54535	1.28144e-17	1.09686e-16	erm	X	FBgn0052259	310.884	5.18986	0.71307	7.27819	3.38e-13	2.79e-12	CG32259	X	FBgn0027843	1481.19	2.94956	0.291057	10.134	3.905e-24	3.32164e-23	CAH2
FBgn0051155	1369.17	-2.47799	0.290498	-8.53014	1.46176e-17	1.2501e-16	Rpb7	X	FBgn0047095	689.404	4.07987	0.561125	7.27087	3.57e-13	2.94e-12	CG33939	X	FBgn0038432	2115.7	-2.35826	0.232782	-10.1308	4.03502e-24	3.42924e-23	CG14883
FBgn0030593	687.281	3.43122	0.402499	8.5248	1.53079e-17	1.308e-16	CG9512	X	FBgn0036482	198.908	5.6263	0.774077	7.2684	3.64e-13	2.99e-12	CG13457	X	FBgn0000024	2895.72	-2.94895	0.291404	-10.1198	4.51303e-24	3.83214e-23	Ace
FBgn0001086	842.361	-2.70992	0.317958	-8.52291	1.55598e-17	1.32836e-16	fzy	X	FBgn0038662	2415.5	2.66805	0.367092	7.26807	3.65e-13	3e-12	Mpc1	X	FBgn0033820	659.413	6.80179	0.672458	10.1148	4.74934e-24	4.02928e-23	CG4716
FBgn0034761	780.785	2.98371	0.350116	8.52206	1.56741e-17	1.33695e-16	CG4250	X	FBgn0051821	457.825	4.76756	0.656265	7.26469	3.74e-13	3.07e-12	CG31821	X	FBgn0029105	405.841	-3.46916	0.343188	-10.1086	5.05824e-24	4.2876e-23	alpha-catenin-related
FBgn0022987	1526.77	-2.22205	0.260767	-8.52124	1.57857e-17	1.3453e-16	qkr54B	X	FBgn0012037	6712.39	3.0013	0.41347	7.25881	3.9e-13	3.2e-12	Ance	X	FBgn0034204	3175.45	9.61215	0.952388	10.0927	5.9522e-24	5.04098e-23	CG10953
FBgn0004878	583.792	-3.15058	0.369746	-8.52092	1.58295e-17	1.34785e-16	cas	X	FBgn0040551	4574.68	4.38913	0.605117	7.25336	4.07e-13	3.33e-12	CG11686	X	FBgn0020416	270.923	5.36669	0.53203	10.0872	6.294e-24	5.32582e-23	Idgf1
FBgn0038043	2729.85	-2.23538	0.262432	-8.51795	1.62408e-17	1.38167e-16	CG17202	X	FBgn0031449	308.141	4.75221	0.655366	7.25124	4.13e-13	3.38e-12	CG31689	X	FBgn0039509	1075.77	2.4251	0.240519	10.0828	6.5842e-24	5.56653e-23	bigmax
FBgn0037635	327.075	4.86297	0.571021	8.51627	1.64775e-17	1.40059e-16	CG9837	X	FBgn0036125	137.017	6.11166	0.842961	7.25023	4.16e-13	3.4e-12	CG6279	X	FBgn0037664	623.907	3.15986	0.313493	10.0795	6.80611e-24	5.74915e-23	CG8420
FBgn0013300	185.805	7.3005	0.857322	8.51547	1.65914e-17	1.40904e-16	ProtA	X	FBgn0030925	147.807	5.1282	0.707583	7.24748	4.25e-13	3.47e-12	Hayan	X	FBgn0039328	429.258	3.54352	0.351572	10.0791	6.83687e-24	5.77013e-23	CHKov2
FBgn0026077	3391.13	2.65114	0.311958	8.4984	1.92228e-17	1.6311e-16	Gasp	X	FBgn0017590	2121.79	-3.54256	0.489177	-7.24189	4.42e-13	3.61e-12	klg	X	FBgn0262531	2153.6	-4.30476	0.427321	-10.0738	7.2105e-24	6.08019e-23	CG43085
FBgn0051997	6989.8	3.87531	0.456085	8.49691	1.94707e-17	1.6507e-16	CG31997	X	FBgn0036587	563.132	4.26994	0.589775	7.23995	4.49e-13	3.66e-12	CG4950	X	FBgn0030940	242.386	5.50924	0.548159	10.0505	9.14485e-24	7.70464e-23	CG15040
FBgn0052354	1071.59	-4.28623	0.50498	-8.48792	2.10374e-17	1.78198e-16	CG32354	X	FBgn0030494	1887.97	5.20524	0.719043	7.23911	4.52e-13	3.68e-12	Cpr12A	X	FBgn0003448	889.795	-4.04436	0.402526	-10.0474	9.42945e-24	7.93754e-23	sna
FBgn0035584	112.958	5.90256	0.695554	8.48613	2.13639e-17	1.80807e-16	CG17030	X	FBgn0003132	125.87	6.56853	0.907653	7.23683	4.59e-13	3.74e-12	Pp1-13C	X	FBgn0036565	1019.98	-4.19539	0.417713	-10.0437	9.79125e-24	8.23498e-23	CG5235
FBgn0031289	138.502	6.23834	0.736166	8.4741	2.36911e-17	2.00329e-16	CG13950	X	FBgn0031064	1012.54	-4.2713	0.590251	-7.23642	4.61e-13	3.75e-12	CG12531	X	FBgn0038952	138.838	4.78079	0.476316	10.037	1.04785e-23	8.8054e-23	CG7069
FBgn0020416	198.262	4.70955	0.556167	8.46787	2.49911e-17	2.1114e-16	Idgf1	X	FBgn0040321	2127.25	4.05006	0.560016	7.23205	4.76e-13	3.87e-12	GNBP3	X	FBgn0010391	4655.98	2.35447	0.234645	10.0342	1.07819e-23	9.05255e-23	Gtp-bp
FBgn0034883	213.941	4.15505	0.490972	8.4629	2.60815e-17	2.20161e-16	Eglp2	X	FBgn0029105	523.337	-4.00938	0.554505	-7.23056	4.81e-13	3.91e-12	alpha-catenin-related	X	FBgn0036756	593.46	4.65726	0.4643	10.0307	1.11698e-23	9.37007e-23	cln3
FBgn0037759	326.133	6.57374	0.776807	8.46251	2.61676e-17	2.20697e-16	CG8526	X	FBgn0039761	149.519	5.64872	0.781261	7.23026	4.82e-13	3.91e-12	CG18404	X	FBgn0004893	1261.65	2.15929	0.21544	10.0227	1.21094e-23	1.01496e-22	bowl
FBgn0031304	1051.32	2.74585	0.324481	8.46228	2.62201e-17	2.2095e-16	CG4552	X	FBgn0053213	295.73	-3.38709	0.468527	-7.22923	4.86e-13	3.94e-12	CG33213	X	FBgn0000406	405.509	7.1749	0.716443	10.0146	1.31472e-23	1.10099e-22	Cyt-b5-r
FBgn0031879	2151.6	2.79878	0.331176	8.45104	2.88729e-17	2.43094e-16	uif	X	FBgn0034789	1483.61	-3.58321	0.496007	-7.22411	5.04e-13	4.09e-12	PIP5K59B	X	FBgn0284220	2418.43	-2.43902	0.243617	-10.0117	1.35443e-23	1.13327e-22	Top2
FBgn0037850	309.429	4.30416	0.509388	8.44968	2.92108e-17	2.45728e-16	CG14695	X	FBgn0028509	2924.85	-2.81015	0.389552	-7.2138	5.44e-13	4.4e-12	CenG1A	X	FBgn0034647	315.495	5.44993	0.544381	10.0112	1.36035e-23	1.13725e-22	pirk
FBgn0243513	552.488	-2.87763	0.340628	-8.44802	2.96296e-17	2.49036e-16	cnir	X	FBgn0010300	21444.4	-3.15219	0.437536	-7.20441	5.83e-13	4.71e-12	brat	X	FBgn0031012	195.998	5.0899	0.508477	10.0101	1.37613e-23	1.14945e-22	CG8051
FBgn0032629	664.374	-2.5878	0.306336	-8.44759	2.97378e-17	2.49731e-16	beat-IIIc	X	FBgn0262964	155.603	6.96087	0.966374	7.20309	5.89e-13	4.76e-12	CR43275	X	FBgn0038877	2441.47	1.97523	0.197445	10.004	1.46424e-23	1.222e-22	CG3308
FBgn0065099	597.865	-4.43101	0.524907	-8.44152	3.13229e-17	2.62817e-16	snRNA:7SK	X	FBgn0039463	163.674	6.24801	0.867595	7.20153	5.95e-13	4.81e-12	CG18472	X	FBgn0037228	347.777	3.82563	0.382598	9.99909	1.53801e-23	1.28247e-22	CG1092
FBgn0020415	2877.22	2.46884	0.292591	8.43786	3.23206e-17	2.70955e-16	Idgf2	X	FBgn0031905	107.839	6.0519	0.84074	7.1983	6.1e-13	4.92e-12	gudu	X	FBgn0283625	134.89	7.71892	0.77219	9.99614	1.58457e-23	1.32016e-22	CG46298
FBgn0036773	1206.32	3.05655	0.362423	8.43365	3.35045e-17	2.80639e-16	CG13698	X	FBgn0085325	5191.1	4.85351	0.674359	7.19722	6.15e-13	4.95e-12	CG34296	X	FBgn0031163	273.955	6.4555	0.64594	9.99396	1.61983e-23	1.34838e-22	CG14579
FBgn0038607	106.222	5.3207	0.631174	8.42984	3.46145e-17	2.89689e-16	hmw	X	FBgn0028430	1396.16	4.26507	0.592739	7.19552	6.22e-13	5.01e-12	He	X	FBgn0085317	442.403	4.93395	0.493708	9.99365	1.62481e-23	1.35137e-22	CG34288
FBgn0013680	8712.53	-5.15223	0.61143	-8.42652	3.56109e-17	2.97773e-16	ND2	X	FBgn0031080	208.976	3.91737	0.544584	7.19331	6.32e-13	5.09e-12	CG12655	X	FBgn0033631	5338.65	2.61099	0.261389	9.98893	1.70417e-23	1.41617e-22	Sod3
FBgn0030913	180.215	-4.36441	0.518005	-8.42543	3.59442e-17	3.00303e-16	CG6123	X	FBgn0040837	270.996	3.81916	0.53096	7.19293	6.34e-13	5.1e-12	CG8620	X	FBgn0040747	142.608	8.40228	0.841452	9.98545	1.7649e-23	1.46538e-22	CG12853
FBgn0051140	2038.71	-2.5699	0.305055	-8.42439	3.62644e-17	3.0272e-16	CG31140	X	FBgn0040817	2108.36	3.6986	0.514498	7.18874	6.54e-13	5.25e-12	CG14132	X	FBgn0010316	1016.72	-2.69051	0.26958	-9.98038	1.85757e-23	1.54101e-22	dap
FBgn0261287	593.456	4.98121	0.591338	8.42363	3.64984e-17	3.04413e-16	ymp	X	FBgn0053189	213.782	7.52588	1.04749	7.1847	6.74e-13	5.41e-12	CG33189	X	FBgn0038652	644.917	4.07718	0.408586	9.97875	1.8883e-23	1.56516e-22	CG7720
FBgn0015299	4739.91	-2.86542	0.340389	-8.41808	3.82718e-17	3.18932e-16	Ssb-c31a	X	FBgn0035922	447.705	-4.19231	0.58352	-7.18452	6.74e-13	5.41e-12	Pex7	X	FBgn0265767	1825.98	-4.80409	0.482417	-9.95837	2.31835e-23	1.91998e-22	zyd
FBgn0259685	1106.27	3.40718	0.404899	8.41487	3.93322e-17	3.27489e-16	crb	X	FBgn0037025	352.484	-3.81834	0.532166	-7.17509	7.23e-13	5.79e-12	Spc105R	X	FBgn0023023	998.465	-2.53522	0.254603	-9.95758	2.33693e-23	1.93373e-22	CRMP
FBgn0039671	372.033	6.62468	0.787645	8.41075	4.07395e-17	3.38918e-16	CG11470	X	FBgn0013683	1823.82	-3.27639	0.45669	-7.17422	7.27e-13	5.82e-12	ND4L	X	FBgn0032603	172.085	5.02418	0.505164	9.94563	2.63492e-23	2.17845e-22	CG17928
FBgn0264086	168.8	4.58893	0.546419	8.3982	4.53391e-17	3.76862e-16	CG43755	X	FBgn0034693	420.858	4.8623	0.677788	7.17377	7.3e-13	5.84e-12	CG11073	X	FBgn0263219	971.937	-3.36354	0.33824	-9.94424	2.67208e-23	2.2073e-22	Dscam4
FBgn0030356	221.622	5.17823	0.616665	8.39716	4.57421e-17	3.79888e-16	CR32661	X	FBgn0033919	4152.24	3.80638	0.530701	7.17235	7.37e-13	5.89e-12	CG8547	X	FBgn0035495	8809.13	-3.46688	0.348695	-9.94243	2.72117e-23	2.24594e-22	CG14989
FBgn0085320	502.1	6.05411	0.721457	8.39151	4.79924e-17	3.98239e-16	CG34291	X	FBgn0050487	134.127	7.51025	1.0473	7.17106	7.44e-13	5.94e-12	CG30487	X	FBgn0032167	234.208	3.90395	0.392691	9.94155	2.74524e-23	2.26389e-22	CG5853
FBgn0033054	983.168	-3.21038	0.382898	-8.38441	5.0981e-17	4.2268e-16	CG14591	X	FBgn0261788	7926	-2.58541	0.360902	-7.16375	7.85e-13	6.26e-12	Ank2	X	FBgn0025821	139.297	8.36845	0.842012	9.93863	2.82685e-23	2.32922e-22	I-t
FBgn0034110	1542.33	3.02942	0.361534	8.37935	5.32204e-17	4.40872e-16	Atg9	X	FBgn0039235	139.424	6.09574	0.851148	7.16179	7.96e-13	6.35e-12	CG10899	X	FBgn0011760	10561.8	-1.93167	0.194408	-9.93621	2.89625e-23	2.38439e-22	ctp
FBgn0263239	389.701	5.53328	0.660585	8.37633	5.46041e-17	4.51952e-16	dar1	X	FBgn0039130	5336.52	2.80673	0.39196	7.16076	8.02e-13	6.39e-12	CG5854	X	FBgn0010397	1502.74	3.32997	0.3352	9.93428	2.95303e-23	2.42907e-22	LamC
FBgn0040726	805.791	-4.18992	0.500552	-8.37061	5.73195e-17	4.74025e-16	dpr1	X	FBgn0031389	301.087	3.83467	0.535564	7.16007	8.06e-13	6.42e-12	CG4259	X	FBgn0053547	1788.29	-2.7243	0.274245	-9.93383	2.96632e-23	2.43794e-22	Rim
FBgn0263257	823.743	-3.53135	0.421987	-8.36838	5.84162e-17	4.82687e-16	Cngl	X	FBgn0012344	794.555	-4.17038	0.58265	-7.15761	8.21e-13	6.53e-12	Dh44	X	FBgn0029838	649.278	2.32874	0.234517	9.92994	3.08433e-23	2.53279e-22	CG4666
FBgn0010240	496.444	-3.50488	0.41897	-8.36546	5.98797e-17	4.94362e-16	Lcch3	X	FBgn0250826	153.999	6.2424	0.873488	7.14652	8.9e-13	7.07e-12	CG34160	X	FBgn0264979	257.725	5.21353	0.525047	9.92966	3.09315e-23	2.53789e-22	CG4267
FBgn0038874	398.6	2.96377	0.354312	8.36487	6.0182e-17	4.96438e-16	ETHR	X	FBgn0029167	789.358	4.18751	0.586111	7.14457	9.03e-13	7.17e-12	Hml	X	FBgn0013300	193.151	9.27313	0.934023	9.92816	3.13991e-23	2.57409e-22	ProtA
FBgn0041182	1678.7	2.61355	0.313033	8.34911	6.87771e-17	5.6686e-16	Tep2	X	FBgn0031564	410.798	4.77574	0.668494	7.14404	9.06e-13	7.19e-12	CG2816	X	FBgn0027552	3186.87	2.97235	0.299441	9.92634	3.19785e-23	2.61939e-22	CG10863
FBgn0025709	105.72	5.8045	0.695526	8.34549	7.09207e-17	5.84035e-16	CG8083	X	FBgn0027578	1807.04	4.01641	0.562257	7.14337	9.11e-13	7.22e-12	CG14526	X	FBgn0266100	683.361	-4.3583	0.439079	-9.926	3.2087e-23	2.62606e-22	CG44837
FBgn0264443	301.9	3.41728	0.409665	8.34164	7.32661e-17	6.02842e-16	CG43861	X	FBgn0260499	990.536	-3.51997	0.49313	-7.13802	9.47e-13	7.5e-12	qvr	X	FBgn0039463	151.407	7.69146	0.774924	9.92544	3.22692e-23	2.63875e-22	CG18472
FBgn0028407	702.622	-3.3364	0.400158	-8.33773	7.57327e-17	6.22613e-16	Drep3	X	FBgn0033063	227.558	4.77482	0.669023	7.137	9.54e-13	7.55e-12	CG14589	X	FBgn0033215	336.561	8.25609	0.832572	9.91637	3.53377e-23	2.88725e-22	CG1942
FBgn0034789	1144.49	-2.48253	0.297828	-8.33542	7.72208e-17	6.34313e-16	PIP5K59B	X	FBgn0033635	3225.66	2.78764	0.39068	7.13535	9.65e-13	7.63e-12	Prip	X	FBgn0033983	759.886	-2.93002	0.295687	-9.9092	3.79662e-23	3.0994e-22	ADPS
FBgn0262126	2918.63	2.20155	0.264177	8.33362	7.84087e-17	6.43531e-16	Sec24CD	X	FBgn0034286	503.357	-3.67195	0.514653	-7.13481	9.69e-13	7.65e-12	dpr13	X	FBgn0039728	363.057	3.89437	0.393035	9.90845	3.82528e-23	3.12018e-22	CG7896
FBgn0053547	2611.19	-3.21703	0.386585	-8.32167	8.67331e-17	7.11255e-16	Rim	X	FBgn0032840	742.948	-4.05963	0.56954	-7.12791	1.02e-12	8.04e-12	sNPF	X	FBgn0039452	223.31	6.55875	0.662161	9.90507	3.95701e-23	3.22493e-22	CG14245
FBgn0046689	161.652	3.85823	0.464157	8.31233	9.38417e-17	7.68904e-16	Takl1	X	FBgn0261832	89.3836	5.81594	0.816365	7.1242	1.05e-12	8.25e-12	CG42764	X	FBgn0010240	467.292	-3.08077	0.311143	-9.90144	4.10317e-23	3.34125e-22	Lcch3
FBgn0030993	1446.06	6.14077	0.738978	8.30982	9.58477e-17	7.84683e-16	Mec2	X	FBgn0040719	116.07	7.51916	1.0558	7.12179	1.07e-12	8.39e-12	CG15357	X	FBgn0028542	410.295	4.67006	0.471857	9.89719	4.28134e-23	3.48342e-22	NimB4
FBgn0026403	407	5.20953	0.627025	8.30832	9.70666e-17	7.93997e-16	Ndg	X	FBgn0040832	877.173	3.51874	0.494211	7.11992	1.08e-12	8.5e-12	CG8012	X	FBgn0002573	150.034	6.81839	0.688947	9.89683	4.2968e-23	3.49308e-22	sens
FBgn0001234	16705.3	2.41512	0.290784	8.30553	9.93758e-17	8.12206e-16	Hsromega	X	FBgn0263647	135.586	6.36356	0.893958	7.11841	1.09e-12	8.59e-12	CG43638	X	FBgn0030259	750.714	-4.37833	0.442468	-9.89525	4.36524e-23	3.54575e-22	CG1545
FBgn0039124	104.799	6.61679	0.797301	8.29899	1.05002e-16	8.5747e-16	tbrd-1	X	FBgn0262682	239.113	6.26265	0.880239	7.11471	1.12e-12	8.81e-12	CR43152	X	FBgn0004106	1915.23	-3.18983	0.322506	-9.89076	4.56545e-23	3.70528e-22	Cdk1
FBgn0033339	1829.23	2.02483	0.24407	8.29608	1.07602e-16	8.7797e-16	Sec31	X	FBgn0085409	3148.49	-3.02386	0.425084	-7.11356	1.13e-12	8.88e-12	smal	X	FBgn0261835	407.847	6.21744	0.628661	9.88996	4.6021e-23	3.73192e-22	CR42767
FBgn0036544	816.528	-3.565	0.429892	-8.29277	1.10641e-16	9.02014e-16	sff	X	FBgn0029147	503.828	4.3417	0.610387	7.11302	1.14e-12	8.91e-12	NtR	X	FBgn0265434	11904.6	1.85	0.187123	9.88654	4.76206e-23	3.85842e-22	zip
FBgn0267408	1343.63	5.88673	0.709988	8.2913	1.12013e-16	9.12439e-16	AOX1	X	FBgn0038127	142.479	5.29485	0.744774	7.10934	1.17e-12	9.14e-12	CG8476	X	FBgn0036606	153.873	6.78469	0.686448	9.88377	4.89573e-23	3.96342e-22	CG13060
FBgn0036381	1820.67	2.9052	0.350423	8.29056	1.12719e-16	9.17423e-16	CG8745	X	FBgn0032894	85.6886	7.84254	1.10471	7.09917	1.26e-12	9.83e-12	CG14402	X	FBgn0020372	1280.28	-3.60308	0.364734	-9.87864	5.1526e-23	4.16791e-22	TM4SF
FBgn0031955	383.858	-3.56887	0.430707	-8.28607	1.1705e-16	9.51887e-16	CG14535	X	FBgn0010258	209.588	4.49429	0.633249	7.0972	1.27e-12	9.96e-12	Rbp4	X	FBgn0039844	5566.91	-2.77656	0.281114	-9.877	5.23787e-23	4.23336e-22	CG1607
FBgn0034224	1078.45	-5.08401	0.61373	-8.28379	1.19311e-16	9.69464e-16	insb	X	FBgn0053278	145.99	6.72607	0.947803	7.09649	1.28e-12	1e-11	CG33278	X	FBgn0016650	187.749	5.4676	0.553653	9.87551	5.31609e-23	4.29302e-22	Lgr1
FBgn0036975	1034.4	3.15565	0.382045	8.25989	1.45801e-16	1.18372e-15	CG5618	X	FBgn0028938	209.684	6.03893	0.85106	7.09578	1.29e-12	1e-11	CG16886	X	FBgn0032590	171.792	4.37765	0.443503	9.87063	5.58157e-23	4.50215e-22	CG4631
FBgn0030429	122.878	6.29945	0.763018	8.25597	1.50678e-16	1.22231e-15	CG4661	X	FBgn0264598	558.621	-3.01309	0.424697	-7.09467	1.3e-12	1.01e-11	PsGEF	X	FBgn0038697	190.764	6.77042	0.685919	9.87058	5.58431e-23	4.50215e-22	CG3581
FBgn0028863	588.868	-4.63189	0.561078	-8.25534	1.51466e-16	1.22768e-15	CG4587	X	FBgn0003896	604.526	-3.09764	0.436948	-7.08928	1.35e-12	1.05e-11	tup	X	FBgn0035006	264.066	5.13711	0.520708	9.86563	5.8664e-23	4.72566e-22	CG4563
FBgn0039789	259.117	5.7697	0.699012	8.25407	1.53089e-16	1.23981e-15	CG9717	X	FBgn0262952	21850.6	-3.34732	0.472167	-7.08928	1.35e-12	1.05e-11	ND4	X	FBgn0031117	826.157	2.26231	0.229322	9.86522	5.89042e-23	4.74108e-22	GstT3
FBgn0036205	298.212	7.09644	0.860418	8.24767	1.61514e-16	1.30696e-15	CG14131	X	FBgn0033054	1372.64	-4.57109	0.644833	-7.08879	1.35e-12	1.05e-11	CG14591	X	FBgn0033963	175.922	6.97778	0.708243	9.85225	6.70276e-23	5.39046e-22	CG12857
FBgn0033502	727.026	3.23203	0.392187	8.24104	1.70726e-16	1.38035e-15	CG12910	X	FBgn0011596	254.178	4.54823	0.641766	7.08705	1.37e-12	1.07e-11	fzo	X	FBgn0005659	152.358	4.51893	0.459234	9.84013	7.56111e-23	6.07574e-22	Ets98B
FBgn0260499	715.659	-3.04177	0.369167	-8.23955	1.72864e-16	1.39649e-15	qvr	X	FBgn0035431	414.91	3.83412	0.541769	7.07703	1.47e-12	1.14e-11	CG14968	X	FBgn0037315	1070.63	2.44679	0.248957	9.8282	8.51302e-23	6.835e-22	Cerk
FBgn0029092	2510.42	2.05392	0.249312	8.23836	1.74581e-16	1.40919e-15	ced-6	X	FBgn0036337	2934.68	2.77331	0.39204	7.07406	1.5e-12	1.17e-11	AdenoK	X	FBgn0030926	244.875	6.24249	0.635585	9.82164	9.08525e-23	7.28843e-22	psh
FBgn0031563	283.981	4.13135	0.501753	8.23384	1.81299e-16	1.46221e-15	CG10031	X	FBgn0262563	322.309	5.2268	0.739006	7.07274	1.52e-12	1.18e-11	CG43103	X	FBgn0032151	933.096	-3.35762	0.341914	-9.82006	9.22856e-23	7.39729e-22	nAChRalpha6
FBgn0039152	188.954	3.86504	0.469446	8.2332	1.82279e-16	1.4689e-15	Root	X	FBgn0040763	453.224	3.83635	0.542488	7.07177	1.53e-12	1.19e-11	CG18336	X	FBgn0004584	2514.08	-2.1118	0.215066	-9.8193	9.29861e-23	7.4473e-22	Rrp1
FBgn0029800	1050.66	-2.39349	0.291102	-8.22219	1.99812e-16	1.60887e-15	lin-52	X	FBgn0031762	1702.55	-3.08703	0.436542	-7.07156	1.53e-12	1.19e-11	CG9098	X	FBgn0262353	574.545	3.11062	0.316799	9.81891	9.33448e-23	7.46989e-22	CR43051
FBgn0037579	293.804	5.44685	0.662477	8.22195	2.00227e-16	1.61088e-15	COX7AL	X	FBgn0031769	8974.23	-2.61589	0.370184	-7.06646	1.59e-12	1.23e-11	CG9135	X	FBgn0039241	4065.86	2.53799	0.258557	9.81601	9.60691e-23	7.68158e-22	CG11089
FBgn0034706	1989.24	3.24763	0.395118	8.21939	2.04547e-16	1.64428e-15	CG11275	X	FBgn0040726	683.198	-3.5414	0.501572	-7.0606	1.66e-12	1.28e-11	dpr1	X	FBgn0015777	6605.75	-2.98385	0.304063	-9.81325	9.87315e-23	7.88798e-22	nrv2
FBgn0030090	1240.68	-2.49529	0.30368	-8.21683	2.08951e-16	1.6783e-15	fend	X	FBgn0036070	114.538	4.9458	0.700504	7.06036	1.66e-12	1.28e-11	CG8072	X	FBgn0058006	179.792	4.14399	0.422368	9.81134	1.0062e-22	8.03229e-22	CG40006
FBgn0017590	2167.02	-3.47534	0.423383	-8.20851	2.23959e-16	1.79737e-15	klg	X	FBgn0004055	2077.45	-3.41495	0.483736	-7.05952	1.67e-12	1.29e-11	uzip	X	FBgn0039808	1694.83	-2.56825	0.261919	-9.80551	1.06606e-22	8.50311e-22	CG12071
FBgn0264001	4242.48	-3.48409	0.424747	-8.20275	2.34943e-16	1.88398e-15	bru3	X	FBgn0033520	94.5212	6.78954	0.962276	7.05571	1.72e-12	1.33e-11	Prx2540-1	X	FBgn0035281	164.9	8.63518	0.880961	9.802	1.10374e-22	8.79648e-22	Cpr62Bc
FBgn0250904	449.727	5.76211	0.702706	8.19988	2.40622e-16	1.92793e-15	CG34434	X	FBgn0036496	123.68	4.62903	0.65616	7.05473	1.73e-12	1.33e-11	CG7804	X	FBgn0031560	971.849	6.35664	0.649412	9.78831	1.26388e-22	1.00645e-21	CG16713
FBgn0284252	1481.19	2.56452	0.312762	8.1996	2.41191e-16	1.93091e-15	Letm1	X	FBgn0051858	122.145	5.53998	0.785414	7.05358	1.74e-12	1.34e-11	t-cup	X	FBgn0037101	107.025	6.17826	0.631302	9.78655	1.28608e-22	1.02329e-21	CG7634
FBgn0029810	1094.74	-3.72618	0.454585	-8.19687	2.46726e-16	1.9736e-15	CG12239	X	FBgn0261588	2297.23	-2.96847	0.420883	-7.05297	1.75e-12	1.35e-11	pdm3	X	FBgn0029890	141.309	5.3951	0.55153	9.78206	1.3444e-22	1.06882e-21	CG4095
FBgn0086347	742.13	2.40334	0.293222	8.19633	2.47847e-16	1.98095e-15	Myo31DF	X	FBgn0052137	577.958	3.14416	0.445844	7.05216	1.76e-12	1.35e-11	CG32137	X	FBgn0032213	2905.82	1.97329	0.201826	9.77714	1.41138e-22	1.12116e-21	CG5390
FBgn0016061	1005.21	-3.93619	0.480388	-8.19378	2.53146e-16	2.02165e-15	side	X	FBgn0264542	2104.98	-3.40435	0.482734	-7.05223	1.76e-12	1.35e-11	CG43921	X	FBgn0039186	2495.11	-2.42302	0.248058	-9.76795	1.5454e-22	1.22661e-21	CG5746
FBgn0033571	1605.35	-2.24252	0.273724	-8.19265	2.55527e-16	2.039e-15	Rpb5	X	FBgn0261046	778.228	-3.48101	0.493761	-7.05	1.79e-12	1.37e-11	Dscam3	X	FBgn0033358	592.96	-3.21175	0.329184	-9.7567	1.72684e-22	1.36951e-21	spab
FBgn0031990	1500.84	2.82251	0.344672	8.18899	2.63435e-16	2.10039e-15	PAPLA1	X	FBgn0036501	1503.87	2.75696	0.392279	7.02806	2.09e-12	1.61e-11	CG7272	X	FBgn0259986	796.473	-2.2981	0.235622	-9.75332	1.7853e-22	1.41472e-21	nab
FBgn0034067	1274.74	2.79249	0.341136	8.18585	2.70392e-16	2.1541e-15	CG8399	X	FBgn0037130	871.03	-4.42313	0.62948	-7.02664	2.12e-12	1.62e-11	Syn1	X	FBgn0032895	831.543	-3.11024	0.31916	-9.74508	1.93624e-22	1.53308e-21	twit
FBgn0030105	1598.98	6.56303	0.801891	8.18444	2.73578e-16	2.17771e-15	CG15369	X	FBgn0028943	139.491	6.21926	0.885327	7.02482	2.14e-12	1.64e-11	CG15638	X	FBgn0029915	1220.25	-2.73986	0.281161	-9.74479	1.94175e-22	1.53619e-21	CG14434
FBgn0032666	2278.74	-2.62484	0.320791	-8.18241	2.78213e-16	2.2128e-15	CG5758	X	FBgn0003002	788.761	-3.17413	0.451932	-7.02347	2.16e-12	1.66e-11	opa	X	FBgn0005671	18065.1	1.91287	0.196377	9.74077	2.02012e-22	1.59689e-21	Vha55
FBgn0031561	212.447	5.25149	0.642032	8.17949	2.85053e-16	2.26536e-15	IM33	X	FBgn0035089	2779.31	4.2788	0.609261	7.02293	2.17e-12	1.66e-11	Phk-3	X	FBgn0029092	2809.36	2.24331	0.230365	9.73806	2.07469e-22	1.6387e-21	ced-6
FBgn0030940	165.234	5.58884	0.683619	8.17538	2.94939e-16	2.34202e-15	CG15040	X	FBgn0262479	193.727	6.19741	0.88278	7.02033	2.21e-12	1.69e-11	CG43069	X	FBgn0034051	2876.25	-1.8183	0.186769	-9.73553	2.12699e-22	1.67865e-21	Mlf
FBgn0039612	179.42	5.35149	0.654893	8.17155	3.04457e-16	2.41564e-15	CG14523	X	FBgn0030913	229.894	-4.09307	0.583246	-7.01775	2.25e-12	1.72e-11	CG6123	X	FBgn0038098	290.046	4.02332	0.413456	9.73097	2.22467e-22	1.75431e-21	CG7381
FBgn0037819	376.023	3.90364	0.477888	8.16851	3.12209e-16	2.47514e-15	CG14688	X	FBgn0034651	78.9442	6.2536	0.891286	7.01638	2.28e-12	1.74e-11	CG15676	X	FBgn0263019	400.172	2.95744	0.30413	9.72425	2.37655e-22	1.87256e-21	CR43314
FBgn0039742	361.602	4.59324	0.562614	8.1641	3.23833e-16	2.56521e-15	CG15528	X	FBgn0028542	471.57	4.36783	0.622665	7.01473	2.3e-12	1.76e-11	NimB4	X	FBgn0005655	4512.3	-2.32564	0.239306	-9.71827	2.52031e-22	1.98423e-21	PCNA
FBgn0262476	1443.84	-3.10938	0.381279	-8.15514	3.48788e-16	2.76065e-15	CG43066	X	FBgn0032867	142.098	4.71441	0.672478	7.01049	2.37e-12	1.81e-11	CG15475	X	FBgn0037525	2202.73	-2.16949	0.223262	-9.71724	2.54576e-22	2.00265e-21	CG17816
FBgn0036733	998.21	-2.52132	0.3092	-8.15433	3.51108e-16	2.77676e-15	U4-U6-60K	X	FBgn0264711	365.614	3.44464	0.49144	7.00928	2.4e-12	1.82e-11	CG43980	X	FBgn0051041	185.801	4.83257	0.49746	9.71448	2.61571e-22	2.05601e-21	CG31041
FBgn0002626	17958.6	-2.94143	0.360802	-8.15248	3.56542e-16	2.81746e-15	RpL32	X	FBgn0031323	146.574	6.44852	0.920109	7.00843	2.41e-12	1.83e-11	CG5139	X	FBgn0003028	876.43	3.0151	0.310516	9.70998	2.73403e-22	2.14728e-21	ovo
FBgn0053322	120.719	6.63405	0.813976	8.15018	3.63372e-16	2.86911e-15	CG33322	X	FBgn0036727	318.61	5.37439	0.767354	7.00379	2.49e-12	1.89e-11	CG7589	X	FBgn0016685	10057.9	-2.3742	0.244687	-9.703	2.92753e-22	2.2974e-21	Nlp
FBgn0263979	6239.86	-2.61089	0.320462	-8.14726	3.72266e-16	2.93697e-15	Caf1-55	X	FBgn0039509	1425.92	2.63578	0.376516	7.00045	2.55e-12	1.94e-11	bigmax	X	FBgn0266758	988.995	2.76197	0.284814	9.69745	3.09137e-22	2.42402e-21	Esyt2
FBgn0038680	134.893	4.42109	0.542763	8.14553	3.7761e-16	2.97672e-15	Cyp12a5	X	FBgn0004554	336.838	4.88714	0.698595	6.99567	2.64e-12	2e-11	Edg91	X	FBgn0083943	139.96	7.52222	0.776397	9.68863	3.37026e-22	2.64058e-21	CG34107
FBgn0034253	504.831	4.59793	0.564538	8.1446	3.80545e-16	2.99744e-15	CG10936	X	FBgn0004878	613.739	-3.28009	0.468929	-6.99486	2.66e-12	2.01e-11	cas	X	FBgn0035346	966.749	4.01861	0.414982	9.68381	3.53291e-22	2.76579e-21	CG1146
FBgn0032634	3815.16	-2.84308	0.34914	-8.14308	3.85363e-16	3.03295e-15	Rpb11	X	FBgn0262515	15801.8	2.58091	0.369102	6.99241	2.7e-12	2.05e-11	VhaAC45	X	FBgn0037238	210.022	-4.23864	0.437743	-9.68296	3.56262e-22	2.78681e-21	CG1090
FBgn0040370	242.425	-3.03663	0.373032	-8.14039	3.9402e-16	3.09859e-15	CG13375	X	FBgn0038147	1153.29	2.81915	0.403241	6.99124	2.72e-12	2.06e-11	CCHa2	X	FBgn0033170	863.122	3.32607	0.343543	9.68167	3.60764e-22	2.81975e-21	sPLA2
FBgn0035165	8223.99	1.9421	0.238708	8.13588	4.08955e-16	3.21345e-15	CG13887	X	FBgn0013753	2605.47	-2.57662	0.370011	-6.96362	3.32e-12	2.51e-11	Bgb	X	FBgn0030247	232.799	5.15994	0.532968	9.68154	3.6125e-22	2.82128e-21	CG15208
FBgn0013688	5081.69	-5.2091	0.640491	-8.13297	4.18898e-16	3.28894e-15	srRNA	X	FBgn0035189	979.141	2.97294	0.42717	6.95962	3.41e-12	2.58e-11	CG9119	X	FBgn0030090	964.691	-2.40376	0.248336	-9.67948	3.68571e-22	2.87615e-21	fend
FBgn0265296	2590.62	-3.35253	0.41295	-8.11849	4.72002e-16	3.7029e-15	Dscam2	X	FBgn0052703	154.292	6.23923	0.896972	6.95588	3.5e-12	2.65e-11	Erk7	X	FBgn0052204	387.105	-4.44843	0.459674	-9.67737	3.76286e-22	2.934e-21	CG32204
FBgn0038652	452.09	4.71242	0.580509	8.11774	4.74926e-16	3.72286e-15	CG7720	X	FBgn0030679	1620.23	2.58225	0.371263	6.9553	3.52e-12	2.65e-11	CG8206	X	FBgn0035638	157.505	6.57611	0.679623	9.67611	3.80917e-22	2.96773e-21	Tektin-C
FBgn0037296	95.5963	6.25306	0.770317	8.11751	4.75839e-16	3.72703e-15	Prosbeta2R2	X	FBgn0038453	4540.13	-2.43346	0.350429	-6.94425	3.8e-12	2.87e-11	CG10326	X	FBgn0278608	4763.14	-3.27509	0.338828	-9.66595	4.2068e-22	3.27491e-21	Dsp1
FBgn0000137	784.155	-3.92164	0.483123	-8.11727	4.76791e-16	3.73149e-15	ase	X	FBgn0005658	862.256	-3.78806	0.545676	-6.94197	3.87e-12	2.91e-11	Ets65A	X	FBgn0036183	199.722	4.98398	0.515968	9.65948	4.48152e-22	3.48598e-21	CG6083
FBgn0003002	740.177	-2.74962	0.338878	-8.11391	4.90174e-16	3.83316e-15	opa	X	FBgn0261341	10234.4	3.63138	0.523178	6.941	3.89e-12	2.93e-11	verm	X	FBgn0004431	544.79	5.82933	0.603581	9.6579	4.55105e-22	3.53724e-21	LysX
FBgn0038412	249.449	3.51167	0.432817	8.1135	4.91803e-16	3.84283e-15	Zip89B	X	FBgn0026438	1505.3	-3.8535	0.555455	-6.93755	3.99e-12	3e-11	Eaat2	X	FBgn0083956	240.225	4.28058	0.443355	9.65499	4.68206e-22	3.63616e-21	CG34120
FBgn0050181	86.9762	5.42059	0.668229	8.11187	4.98464e-16	3.89176e-15	ppk3	X	FBgn0052677	1581.84	-3.09344	0.445905	-6.93744	3.99e-12	3e-11	X11Lbeta	X	FBgn0037565	104.907	6.20743	0.642985	9.65408	4.72393e-22	3.66575e-21	CG9626
FBgn0264427	112.865	4.64546	0.572844	8.10946	5.08446e-16	3.96653e-15	CG43845	X	FBgn0036723	233.088	5.42538	0.78212	6.93677	4.01e-12	3.01e-11	CG12229	X	FBgn0030930	2312.42	2.65789	0.275349	9.65282	4.78222e-22	3.70803e-21	GalNAc-T2
FBgn0032650	86.5801	6.00314	0.74067	8.10502	5.27389e-16	4.11102e-15	CG7094	X	FBgn0004362	29193.2	-2.48904	0.358937	-6.93446	4.08e-12	3.06e-11	HmgD	X	FBgn0262717	744.934	2.96095	0.306842	9.64974	4.92791e-22	3.81795e-21	Skeletor
FBgn0035922	550.96	-4.15679	0.512939	-8.10387	5.32381e-16	4.14663e-15	Pex7	X	FBgn0015550	466.763	-3.84903	0.555526	-6.92861	4.25e-12	3.19e-11	tap	X	FBgn0038404	148.254	6.0989	0.632149	9.64788	5.01806e-22	3.8847e-21	CG8925
FBgn0020255	13511.9	-1.83183	0.22611	-8.10148	5.42939e-16	4.2255e-15	Ran	X	FBgn0263400	129.556	4.69497	0.677815	6.92663	4.31e-12	3.23e-11	CG43446	X	FBgn0263022	93.8968	6.78842	0.704061	9.64181	5.32409e-22	4.11834e-21	CG43317
FBgn0026085	333.961	-2.69299	0.332545	-8.09812	5.58172e-16	4.3406e-15	dgt4	X	FBgn0261649	1598.03	-2.97	0.428873	-6.92512	4.36e-12	3.26e-11	tinc	X	FBgn0034099	116.604	6.09107	0.631749	9.6416	5.335e-22	4.1235e-21	CG15708
FBgn0032741	899.476	-2.65547	0.328047	-8.0948	5.73588e-16	4.45693e-15	Sidpn	X	FBgn0267625	185.303	5.1451	0.743108	6.92375	4.4e-12	3.29e-11	CR45963	X	FBgn0029766	11801.8	3.05404	0.316792	9.64052	5.39116e-22	4.1636e-21	CG15784
FBgn0038426	835.545	-2.60465	0.321907	-8.09132	5.90216e-16	4.5825e-15	mRpS33	X	FBgn0051118	1365.97	-2.81277	0.406432	-6.92065	4.5e-12	3.36e-11	RabX4	X	FBgn0052284	191.286	6.09558	0.633313	9.62491	6.27613e-22	4.84322e-21	CG32284
FBgn0267073	163.416	4.19218	0.518358	8.08742	6.09403e-16	4.72771e-15	CR45517	X	FBgn0036494	699.292	-3.55626	0.51405	-6.91812	4.58e-12	3.42e-11	Toll-6	X	FBgn0085484	3642.07	2.35464	0.244685	9.62318	6.3827e-22	4.92155e-21	Pdxk
FBgn0028704	1370.94	-2.76069	0.3417	-8.07928	6.51489e-16	5.05021e-15	Nckx30C	X	FBgn0284244	1581.23	3.37719	0.488224	6.9173	4.6e-12	3.43e-11	l(2)k05911	X	FBgn0261270	5679.62	-2.06427	0.214619	-9.61828	6.69442e-22	5.15783e-21	SelD
FBgn0032889	1702.3	2.26564	0.28053	8.07628	6.67748e-16	5.17214e-15	CG9331	X	FBgn0030665	336.956	-3.49016	0.504623	-6.91638	4.63e-12	3.45e-11	CG15646	X	FBgn0038680	297.844	4.30448	0.44757	9.61744	6.74892e-22	5.19571e-21	Cyp12a5
FBgn0259982	566.006	-2.93474	0.363635	-8.07056	6.99759e-16	5.41579e-15	l(2)35Cc	X	FBgn0063492	580.849	3.06802	0.443839	6.91247	4.76e-12	3.55e-11	GstE8	X	FBgn0261836	15812.4	2.49502	0.25947	9.61583	6.85529e-22	5.27343e-21	Msp300
FBgn0031717	2796.61	2.08923	0.258896	8.06976	7.04345e-16	5.44697e-15	Oscillin	X	FBgn0030310	1365.8	3.94157	0.57041	6.91005	4.84e-12	3.61e-11	PGRP-SA	X	FBgn0032820	1061.82	3.03325	0.31557	9.61199	7.11604e-22	5.46968e-21	fbp
FBgn0259923	882.629	-3.24715	0.403012	-8.0572	7.80649e-16	6.03229e-15	2020-09-04	X	FBgn0037298	6587.97	3.167	0.458697	6.90434	5.04e-12	3.75e-11	CG2604	X	FBgn0260446	401.794	-3.68307	0.383289	-9.60911	7.31787e-22	5.62038e-21	GABA-B-R1
FBgn0030319	114.511	5.12578	0.636295	8.05565	7.90556e-16	6.10401e-15	CG2533	X	FBgn0264982	92.8112	5.73123	0.83009	6.90435	5.04e-12	3.75e-11	CR44133	X	FBgn0266936	235.651	-4.44974	0.463186	-9.60681	7.48349e-22	5.74305e-21	CR45387
FBgn0020238	65978.6	-2.05894	0.255601	-8.05528	7.92993e-16	6.118e-15	14-3-3epsilon	X	FBgn0032139	206.193	4.76974	0.691568	6.89699	5.31e-12	3.94e-11	CG13116	X	FBgn0025111	274.105	3.15857	0.328867	9.60442	7.65856e-22	5.87277e-21	Ant2
FBgn0032453	3748.66	-2.0275	0.251743	-8.05385	8.02319e-16	6.18507e-15	CG6180	X	FBgn0035452	666.219	3.29893	0.478607	6.89276	5.47e-12	4.06e-11	CG10359	X	FBgn0010342	2732.17	-2.43836	0.253882	-9.60428	7.66937e-22	5.87643e-21	Map60
FBgn0045761	2283.71	3.10022	0.385064	8.05118	8.19968e-16	6.31615e-15	CHKov1	X	FBgn0037616	194.874	5.11824	0.742691	6.89147	5.52e-12	4.09e-11	CG8136	X	FBgn0039244	540.136	4.23105	0.440574	9.60349	7.7285e-22	5.91707e-21	CG11069
FBgn0037573	2460.66	-2.39085	0.296972	-8.05078	8.22687e-16	6.3321e-15	eIF4AIII	X	FBgn0263022	102.377	5.77356	0.838639	6.88444	5.8e-12	4.3e-11	CG43317	X	FBgn0036007	9008.24	-2.56678	0.267363	-9.60035	7.96751e-22	6.09527e-21	path
FBgn0047338	89.7199	6.03781	0.750093	8.04941	8.31914e-16	6.39808e-15	CG32148	X	FBgn0030160	4763.79	3.22322	0.468243	6.88365	5.83e-12	4.32e-11	CG9691	X	FBgn0030897	1188.09	-2.70728	0.282042	-9.59885	8.08433e-22	6.17978e-21	Frq1
FBgn0031736	1808.45	-2.05418	0.25526	-8.04738	8.45884e-16	6.50041e-15	CG11030	X	FBgn0029837	412.255	-5.37118	0.780869	-6.87846	6.05e-12	4.47e-11	Tsp5D	X	FBgn0029147	295.324	3.83788	0.399906	9.59696	8.23364e-22	6.28897e-21	NtR
FBgn0029766	19934.8	3.6893	0.458708	8.04282	8.77933e-16	6.74139e-15	CG15784	X	FBgn0031424	3207.1	-4.18192	0.608035	-6.87776	6.08e-12	4.49e-11	VGlut	X	FBgn0262722	120.16	5.97796	0.622969	9.59593	8.31675e-22	6.34748e-21	CR43166
FBgn0026787	1099.69	2.03616	0.253168	8.04272	8.78665e-16	6.74172e-15	Nhe1	X	FBgn0265536	105.686	5.61175	0.817352	6.86577	6.61e-12	4.88e-11	CR44386	X	FBgn0039083	154.54	5.9908	0.624398	9.59451	8.43141e-22	6.42994e-21	CG10177
FBgn0086358	1084.67	3.96167	0.492659	8.04141	8.88123e-16	6.80894e-15	Tab2	X	FBgn0005677	1441.48	-2.57785	0.375573	-6.86378	6.71e-12	4.95e-11	dac	X	FBgn0035951	1491.68	-2.1415	0.2233	-9.59026	8.78602e-22	6.69512e-21	CG5068
FBgn0262686	389.899	-4.01217	0.49902	-8.04011	8.97542e-16	6.87577e-15	CG43156	X	FBgn0264006	1466.64	-2.71931	0.396365	-6.86061	6.86e-12	5.05e-11	dysc	X	FBgn0001281	155.1	5.30969	0.554063	9.58319	9.40974e-22	7.16481e-21	janB
FBgn0029890	144.509	5.92532	0.737631	8.03291	9.5186e-16	7.28617e-15	CG4095	X	FBgn0015609	4203.52	-3.76653	0.549106	-6.85938	6.92e-12	5.09e-11	CadN	X	FBgn0037035	165.171	4.93481	0.515006	9.58205	9.51353e-22	7.23817e-21	CG10589
FBgn0032639	667.853	5.60194	0.697521	8.03121	9.65177e-16	7.38232e-15	CG18563	X	FBgn0013763	14222.9	3.45935	0.504551	6.8563	7.07e-12	5.2e-11	Idgf6	X	FBgn0063491	186.139	4.03329	0.421205	9.57559	1.01277e-21	7.6994e-21	GstE9
FBgn0038956	145.244	-4.96628	0.618561	-8.02876	9.84641e-16	7.52531e-15	CG5379	X	FBgn0085479	113.642	6.36794	0.929083	6.854	7.18e-12	5.28e-11	CG34450	X	FBgn0045852	907.275	-2.56976	0.268401	-9.57433	1.02517e-21	7.78765e-21	ham
FBgn0052698	919.085	3.62376	0.451508	8.02591	1.00774e-15	7.6958e-15	CG32698	X	FBgn0003159	1358.84	2.64771	0.386392	6.8524	7.26e-12	5.34e-11	CG2841	X	FBgn0041181	206.514	5.49015	0.573561	9.57205	1.04805e-21	7.95519e-21	Tep3
FBgn0264598	487.337	-3.33874	0.416008	-8.02568	1.00967e-15	7.70458e-15	PsGEF	X	FBgn0037770	2832.91	-2.64382	0.386432	-6.84161	7.83e-12	5.75e-11	Art4	X	FBgn0034788	881.181	-3.30502	0.345334	-9.57051	1.0638e-21	8.06847e-21	CG13532
FBgn0026439	2500.13	-3.09787	0.386002	-8.02551	1.01104e-15	7.70894e-15	Eaat1	X	FBgn0030998	167.137	4.50265	0.658197	6.84088	7.87e-12	5.78e-11	CG14195	X	FBgn0024352	3793.52	-1.92275	0.200999	-9.56596	1.11164e-21	8.42473e-21	Hop
FBgn0029838	916.467	2.97197	0.370503	8.02143	1.04517e-15	7.96303e-15	CG4666	X	FBgn0250824	156.539	6.40474	0.937005	6.83534	8.18e-12	6e-11	CG33655	X	FBgn0033210	772.615	-2.25154	0.235405	-9.56454	1.127e-21	8.53451e-21	U2A
FBgn0033108	402.216	-3.55326	0.443053	-8.01994	1.05794e-15	8.05399e-15	CG15236	X	FBgn0040281	2213.97	-3.83284	0.560948	-6.83279	8.33e-12	6.1e-11	Aplip1	X	FBgn0032666	1681.07	-2.46586	0.257885	-9.56188	1.15642e-21	8.75047e-21	CG5758
FBgn0037906	520.163	3.71395	0.463477	8.01323	1.1173e-15	8.49931e-15	PGRP-LB	X	FBgn0000346	841.772	-3.19121	0.467065	-6.83247	8.35e-12	6.11e-11	comt	X	FBgn0020767	2051.97	-2.39921	0.250926	-9.56141	1.16162e-21	8.78302e-21	Spred
FBgn0020269	1402.3	-2.88948	0.360664	-8.01157	1.13256e-15	8.60867e-15	mspo	X	FBgn0020521	3696.94	3.31256	0.484822	6.83252	8.34e-12	6.11e-11	pio	X	FBgn0033174	289.783	2.94251	0.307803	9.55974	1.18058e-21	8.91941e-21	CG11125
FBgn0265191	968.667	2.28375	0.285067	8.01129	1.13513e-15	8.62154e-15	Glycogenin	X	FBgn0087002	17444.4	2.44837	0.358443	6.83057	8.46e-12	6.18e-11	apolpp	X	FBgn0030679	1487.48	2.61988	0.274073	9.55906	1.1883e-21	8.97078e-21	CG8206
FBgn0031695	336.037	5.05342	0.631139	8.00682	1.17708e-15	8.93321e-15	Cyp4ac3	X	FBgn0034399	3101.95	3.34804	0.490237	6.82942	8.53e-12	6.23e-11	CG15083	X	FBgn0015602	2445.29	-1.92946	0.202046	-9.54959	1.30217e-21	9.82279e-21	BEAF-32
FBgn0259175	704.828	2.21327	0.276514	8.0042	1.20247e-15	9.11879e-15	ome	X	FBgn0033130	241.922	4.23442	0.620119	6.82841	8.59e-12	6.27e-11	Tsp42Ei	X	FBgn0004880	2284.76	-3.35069	0.350929	-9.54806	1.32145e-21	9.96051e-21	scrt
FBgn0004959	1890.08	-2.34137	0.292605	-8.00182	1.22595e-15	9.28966e-15	phm	X	FBgn0003353	356.665	-3.29823	0.483063	-6.82775	8.63e-12	6.29e-11	sei	X	FBgn0032783	485.14	2.85271	0.299206	9.53424	1.50985e-21	1.13718e-20	CG10237
FBgn0030082	1484.43	-2.89825	0.362376	-7.99791	1.2655e-15	9.58195e-15	HP1b	X	FBgn0265342	178.573	5.223	0.765055	6.82696	8.67e-12	6.32e-11	CG44296	X	FBgn0010228	11354.1	-1.79632	0.188413	-9.53396	1.51393e-21	1.13937e-20	HmgZ
FBgn0033926	45155.3	2.37238	0.296748	7.9946	1.29994e-15	9.83509e-15	Arc1	X	FBgn0038207	160.039	4.59054	0.672871	6.82232	8.96e-12	6.52e-11	CG14356	X	FBgn0052450	149.789	5.63021	0.590723	9.53106	1.55691e-21	1.17081e-20	CG32450
FBgn0028988	230.959	5.37966	0.673049	7.99296	1.31736e-15	9.95913e-15	Spn42Dd	X	FBgn0035426	117.677	5.57368	0.817573	6.81735	9.27e-12	6.74e-11	CG12078	X	FBgn0008636	532.127	-3.43533	0.360742	-9.52294	1.68342e-21	1.26497e-20	hbn
FBgn0034021	524.353	2.9173	0.365238	7.9874	1.37813e-15	1.04105e-14	CG8180	X	FBgn0023531	709.593	-3.16261	0.464171	-6.81347	9.53e-12	6.92e-11	CG32809	X	FBgn0026438	1018.48	-3.84586	0.403928	-9.52116	1.71256e-21	1.28588e-20	Eaat2
FBgn0036109	200.478	7.36859	0.9226	7.98677	1.38522e-15	1.0456e-14	Cpr67Fa2	X	FBgn0052110	78.8536	5.58959	0.821065	6.80773	9.92e-12	7.2e-11	CG32110	X	FBgn0032294	119.178	6.04933	0.635649	9.51678	1.78629e-21	1.3402e-20	Vha16-5
FBgn0016983	2267.37	-2.36551	0.296206	-7.98603	1.3935e-15	1.05104e-14	smid	X	FBgn0053653	3329.8	-2.94619	0.432789	-6.80746	9.93e-12	7.2e-11	Cadps	X	FBgn0283508	7181.17	3.10153	0.325926	9.51607	1.79847e-21	1.3483e-20	nw
FBgn0037228	412.458	4.17839	0.523276	7.98507	1.40439e-15	1.05843e-14	CG1092	X	FBgn0000527	2687.97	3.76662	0.553512	6.80495	1.01e-11	7.31e-11	e	X	FBgn0038966	1440.87	3.69994	0.388877	9.51442	1.82738e-21	1.36892e-20	pinta
FBgn0004666	251.087	-8.70586	1.09079	-7.98126	1.44844e-15	1.09079e-14	sim	X	FBgn0035955	204.32	4.86312	0.714625	6.80514	1.01e-11	7.31e-11	CG5194	X	FBgn0036381	1935.16	3.09329	0.325439	9.50498	2.00084e-21	1.4977e-20	CG8745
FBgn0030536	126.214	4.05046	0.507595	7.97971	1.46677e-15	1.10375e-14	CG11068	X	FBgn0050424	272.158	3.961	0.582073	6.80499	1.01e-11	7.31e-11	CG30424	X	FBgn0086907	176.026	5.06385	0.532836	9.50359	2.02786e-21	1.51676e-20	Cyt-c-d
FBgn0085465	171.009	5.93694	0.745861	7.95984	1.72264e-15	1.29529e-14	CG34436	X	FBgn0037007	21397.5	2.37357	0.34887	6.80358	1.02e-11	7.38e-11	CG5059	X	FBgn0035308	499.59	2.99528	0.315211	9.50243	2.05041e-21	1.53245e-20	CG15822
FBgn0035076	138.623	4.39446	0.552105	7.95945	1.72803e-15	1.29834e-14	Ance-5	X	FBgn0027843	2428.67	3.34469	0.491634	6.8032	1.02e-11	7.39e-11	CAH2	X	FBgn0037737	606.499	-2.46372	0.259335	-9.50016	2.09566e-21	1.56507e-20	Pnn
FBgn0035542	6235.44	2.81118	0.353257	7.95788	1.75005e-15	1.31388e-14	DOR	X	FBgn0016974	130.088	4.59893	0.676107	6.80207	1.03e-11	7.45e-11	swaPsi	X	FBgn0015380	2152	-2.09711	0.220774	-9.49891	2.12105e-21	1.58282e-20	drl
FBgn0004175	283.521	6.61217	0.831377	7.95328	1.81637e-15	1.36263e-14	Mst84Dd	X	FBgn0047135	30222.2	2.82908	0.416117	6.79876	1.06e-11	7.61e-11	CG32276	X	FBgn0037248	867.444	-2.18589	0.230282	-9.49224	2.26121e-21	1.68612e-20	srl
FBgn0026593	159.429	4.36924	0.549371	7.95317	1.81794e-15	1.36276e-14	CG5707	X	FBgn0020513	10263.1	2.90356	0.427119	6.79801	1.06e-11	7.65e-11	ade5	X	FBgn0033302	277.305	3.96959	0.418585	9.48335	2.46246e-21	1.83478e-20	Cyp6a14
FBgn0011259	3098.48	-3.13239	0.394003	-7.95016	1.86274e-15	1.39527e-14	Sema1a	X	FBgn0041712	338.404	4.07512	0.599602	6.79637	1.07e-11	7.73e-11	yellow-d	X	FBgn0267511	132.954	4.53066	0.478003	9.47832	2.58407e-21	1.92392e-20	28SrRNA-Psi:CR45851
FBgn0032124	198.996	5.89691	0.741889	7.94851	1.88772e-15	1.4129e-14	CG17855	X	FBgn0037028	899.343	-2.98437	0.439128	-6.79613	1.07e-11	7.73e-11	CG3618	X	FBgn0030429	108.417	5.23745	0.553139	9.4686	2.83632e-21	2.11011e-20	CG4661
FBgn0033907	718.013	-2.96564	0.373144	-7.94771	1.89997e-15	1.42098e-14	mRpS16	X	FBgn0036620	126.074	5.50662	0.810383	6.79508	1.08e-11	7.79e-11	CG4842	X	FBgn0000036	877.654	-2.43913	0.257745	-9.46333	2.98296e-21	2.21751e-20	nAChRalpha1
FBgn0037315	1260.34	2.96576	0.373519	7.94004	2.02119e-15	1.51048e-14	Cerk	X	FBgn0024944	240.049	-4.42861	0.65193	-6.79307	1.1e-11	7.89e-11	Oamb	X	FBgn0037376	1936.73	-2.17457	0.229815	-9.46228	3.01299e-21	2.23812e-20	Hat1
FBgn0003447	5888.96	-2.73895	0.345077	-7.93721	2.06772e-15	1.54408e-14	sn	X	FBgn0259219	969.582	5.04539	0.742792	6.79246	1.1e-11	7.92e-11	CG42319	X	FBgn0033149	90.9465	5.40881	0.571725	9.46051	3.06451e-21	2.27466e-20	CG11060
FBgn0053543	445.723	-3.71929	0.468594	-7.93711	2.06941e-15	1.54416e-14	CG33543	X	FBgn0010015	246.341	3.82441	0.563339	6.78882	1.13e-11	8.11e-11	CanA1	X	FBgn0037770	2225.4	-2.65731	0.281107	-9.45301	3.29232e-21	2.44189e-20	Art4
FBgn0261862	1857.79	2.71615	0.342414	7.93236	2.15024e-15	1.60325e-14	whd	X	FBgn0050463	2760	2.83749	0.418083	6.78691	1.15e-11	8.21e-11	CG30463	X	FBgn0031453	23870.2	-2.33348	0.246924	-9.4502	3.38199e-21	2.50648e-20	Bacc
FBgn0037239	2523.34	2.53184	0.319253	7.93052	2.18227e-15	1.62589e-14	CG11739	X	FBgn0052683	208.253	-3.93501	0.579863	-6.7861	1.15e-11	8.25e-11	CG32683	X	FBgn0015550	825.692	-4.05025	0.428761	-9.4464	3.50686e-21	2.59705e-20	tap
FBgn0038282	632.633	-2.80441	0.353629	-7.93038	2.18481e-15	1.62655e-14	dpr9	X	FBgn0028896	148.505	4.60156	0.678294	6.78401	1.17e-11	8.37e-11	CG17329	X	FBgn0261446	198.686	3.84467	0.407233	9.44096	3.69382e-21	2.73343e-20	CG13377
FBgn0010038	450.817	3.31194	0.417702	7.92894	2.21018e-15	1.64418e-14	GstD2	X	FBgn0038540	2692.12	-3.66992	0.541134	-6.7819	1.19e-11	8.48e-11	CG14321	X	FBgn0035823	122.643	5.51848	0.584601	9.43974	3.73715e-21	2.76339e-20	eIF4E-5
FBgn0030572	1207.24	-2.31663	0.292327	-7.92477	2.28567e-15	1.69904e-14	mRpS25	X	FBgn0261628	199.207	5.84293	0.861817	6.77979	1.2e-11	8.6e-11	CG42711	X	FBgn0039155	816.74	3.35199	0.355113	9.43922	3.75552e-21	2.77486e-20	Kal1
FBgn0042179	214.127	6.49405	0.819717	7.92231	2.3314e-15	1.73172e-14	CG18869	X	FBgn0053970	364.458	3.47956	0.513636	6.77437	1.25e-11	8.92e-11	CG33970	X	FBgn0005648	3215.07	-1.71588	0.181788	-9.43891	3.76686e-21	2.78113e-20	Pabp2
FBgn0000564	432.407	-4.04595	0.511068	-7.91666	2.43982e-15	1.81088e-14	Eh	X	FBgn0034720	1495.52	-2.90528	0.429234	-6.76852	1.3e-11	9.29e-11	Liprin-gamma	X	FBgn0020385	818.711	3.95296	0.418838	9.43791	3.80301e-21	2.80569e-20	pug
FBgn0086909	1759	2.3333	0.294968	7.91035	2.56665e-15	1.90356e-14	CG31751	X	FBgn0033724	3855.98	4.25162	0.628297	6.7669	1.32e-11	9.38e-11	CG8501	X	FBgn0039807	97.359	6.72558	0.712692	9.43687	3.84099e-21	2.83156e-20	CG15546
FBgn0051446	89.2772	6.33981	0.80177	7.90727	2.63095e-15	1.94978e-14	CG31446	X	FBgn0001142	7401.16	2.90181	0.429357	6.7585	1.39e-11	9.94e-11	Gs1	X	FBgn0023540	835.355	2.83432	0.30038	9.43579	3.8807e-21	2.85867e-20	CG3630
FBgn0039584	840.731	-4.76998	0.604026	-7.89698	2.85737e-15	2.11597e-14	beat-VI	X	FBgn0029866	593.554	3.65928	0.542364	6.7469	1.51e-11	1.08e-10	CG3842	X	FBgn0033913	951.469	3.357	0.355928	9.43167	4.03594e-21	2.97079e-20	CG8468
FBgn0034070	1119.7	-2.96591	0.375769	-7.89292	2.95192e-15	2.18433e-14	SP2353	X	FBgn0032400	49658.2	3.29273	0.488054	6.74665	1.51e-11	1.08e-10	CG6770	X	FBgn0036984	593.144	-2.75213	0.292155	-9.4201	4.50656e-21	3.31469e-20	CG13248
FBgn0031064	647.448	-2.96586	0.375874	-7.89058	3.00783e-15	2.22402e-14	CG12531	X	FBgn0085217	161.753	6.58687	0.976437	6.74582	1.52e-11	1.08e-10	CG34188	X	FBgn0266777	280.321	-5.78527	0.614158	-9.41985	4.51717e-21	3.31998e-20	CR45242
FBgn0036179	299.361	-3.13321	0.397107	-7.89011	3.01929e-15	2.23016e-14	CG7368	X	FBgn0259239	392.182	-3.80778	0.564635	-6.74379	1.54e-11	1.1e-10	CG42337	X	FBgn0266742	123.537	6.4425	0.684108	9.41738	4.62467e-21	3.39642e-20	CR45215
FBgn0037913	28765.5	-2.7207	0.344826	-7.89005	3.0207e-15	2.23016e-14	fabp	X	FBgn0031757	98.9669	5.10845	0.757528	6.74358	1.55e-11	1.1e-10	Ucp4C	X	FBgn0050324	114.594	6.3973	0.679358	9.41668	4.65566e-21	3.41661e-20	CG30324
FBgn0051861	127.763	5.09058	0.645199	7.88994	3.02322e-15	2.23034e-14	CG31861	X	FBgn0014879	6690.78	-2.38502	0.354402	-6.7297	1.7e-11	1.21e-10	Set	X	FBgn0031955	366.545	-2.6701	0.283561	-9.41631	4.67236e-21	3.42628e-20	CG14535
FBgn0035675	1700.48	-3.01015	0.381636	-7.88749	3.08332e-15	2.27296e-14	CG6610	X	FBgn0035964	6205.84	2.71012	0.403027	6.72441	1.76e-11	1.25e-10	Dhpr	X	FBgn0031365	111.982	6.55033	0.695788	9.41425	4.76461e-21	3.49129e-20	CG17650
FBgn0000028	304.768	-4.00405	0.507726	-7.88625	3.11402e-15	2.29386e-14	acj6	X	FBgn0022359	495.243	3.06961	0.456528	6.72381	1.77e-11	1.25e-10	Sodh-2	X	FBgn0263994	754.379	-3.61735	0.384469	-9.40868	5.02405e-21	3.67863e-20	CG43737
FBgn0036008	3908.26	-2.63114	0.334581	-7.86397	3.72134e-15	2.73917e-14	CG3408	X	FBgn0030770	85.25	7.83272	1.16556	6.72013	1.82e-11	1.29e-10	CG13010	X	FBgn0030158	6980.88	-2.83288	0.301164	-9.40644	5.13212e-21	3.75494e-20	CG9686
FBgn0035574	564.548	4.63872	0.590142	7.86033	3.83108e-15	2.81782e-14	RhoGEF64C	X	FBgn0052227	1492.31	-3.48414	0.518532	-6.71924	1.83e-11	1.29e-10	gogo	X	FBgn0031753	310.355	-3.69927	0.393409	-9.40313	5.29637e-21	3.8722e-20	CG13999
FBgn0039305	974.49	-2.31049	0.294158	-7.85457	4.01146e-15	2.94827e-14	CG11858	X	FBgn0032897	12380.6	3.18498	0.474155	6.71716	1.85e-11	1.31e-10	CG9336	X	FBgn0037560	220.453	4.25206	0.452299	9.401	5.40451e-21	3.94829e-20	CR18228
FBgn0038126	733.689	3.3552	0.427237	7.85324	4.05421e-15	2.97746e-14	CG8483	X	FBgn0027783	767.968	-3.21447	0.478719	-6.71473	1.88e-11	1.33e-10	SMC2	X	FBgn0033458	201.521	5.49165	0.584365	9.39764	5.58028e-21	4.07365e-20	CG18446
FBgn0264979	250.086	5.38862	0.686262	7.85214	4.08997e-15	3.00146e-14	CG4267	X	FBgn0266354	268.181	-5.04603	0.751519	-6.71444	1.89e-11	1.33e-10	CG45002	X	FBgn0031182	407.863	4.78287	0.508988	9.39681	5.62445e-21	4.10281e-20	Cyp6t1
FBgn0031873	1005.92	-2.17382	0.277061	-7.84598	4.29579e-15	3.15014e-14	Gas41	X	FBgn0029963	103.225	5.6854	0.847031	6.71216	1.92e-11	1.35e-10	CG10920	X	FBgn0038163	363.533	5.83645	0.621156	9.39611	5.66191e-21	4.12704e-20	CG10841
FBgn0035236	3910.76	1.83982	0.23455	7.84406	4.36205e-15	3.19633e-14	CG12004	X	FBgn0052026	287.155	3.68954	0.549866	6.70988	1.95e-11	1.37e-10	CG32026	X	FBgn0028374	496.479	-3.87384	0.412492	-9.3913	5.92621e-21	4.31647e-20	Hug
FBgn0034797	783.975	3.26002	0.415618	7.84379	4.37153e-15	3.20088e-14	nahoda	X	FBgn0037228	574.012	3.90154	0.581786	6.70614	2e-11	1.41e-10	CG1092	X	FBgn0046214	3919.67	-1.79574	0.191268	-9.38859	6.08078e-21	4.42573e-20	vig2
FBgn0038416	182.674	6.29516	0.803909	7.83069	4.85204e-15	3.55005e-14	CG17930	X	FBgn0026563	127.673	6.2917	0.938575	6.70345	2.04e-11	1.43e-10	CG1979	X	FBgn0030863	2562.64	-2.51973	0.268426	-9.38706	6.16999e-21	4.48731e-20	CG8188
FBgn0000412	8742.91	-2.46871	0.315366	-7.82808	4.95369e-15	3.62172e-14	D1	X	FBgn0051244	98.416	6.8459	1.02161	6.7011	2.07e-11	1.45e-10	CG31244	X	FBgn0036202	2672.48	-3.79372	0.404207	-9.38558	6.25733e-21	4.54404e-20	CG6024
FBgn0002862	568.146	6.08563	0.778296	7.81918	5.31693e-15	3.88438e-14	Mst87F	X	FBgn0039297	887.661	3.25189	0.485465	6.69851	2.11e-11	1.48e-10	CG11852	X	FBgn0037521	698.707	-2.92236	0.311365	-9.38565	6.25307e-21	4.54404e-20	CG2993
FBgn0031034	342.22	5.96517	0.763907	7.80877	5.77495e-15	4.21584e-14	CG14205	X	FBgn0051955	308.221	3.50606	0.523505	6.69728	2.12e-11	1.49e-10	CG31955	X	FBgn0262687	122.744	4.81042	0.512992	9.37718	6.77589e-21	4.91694e-20	CR43157
FBgn0267002	2902.64	-2.63956	0.338063	-7.8079	5.81477e-15	4.24174e-14	unc-104	X	FBgn0036008	3891.25	-2.79024	0.416898	-6.69286	2.19e-11	1.54e-10	CG3408	X	FBgn0051913	104.007	6.30407	0.672813	9.36972	7.2724e-21	5.2733e-20	CG31913
FBgn0019925	6289.29	2.08377	0.266988	7.80475	5.96218e-15	4.3428e-14	Surf4	X	FBgn0260799	5530.06	-2.36988	0.354243	-6.68997	2.23e-11	1.56e-10	p120ctn	X	FBgn0037186	282.398	2.74464	0.29299	9.36768	7.41459e-21	5.37241e-20	CG11241
FBgn0264291	1136.34	-2.64331	0.338679	-7.80478	5.96059e-15	4.3428e-14	Det	X	FBgn0000053	4675.57	3.01581	0.450955	6.68761	2.27e-11	1.59e-10	ade3	X	FBgn0038708	126.567	7.19019	0.767694	9.36596	7.53621e-21	5.45646e-20	CG6255
FBgn0037310	155.44	4.20776	0.539236	7.8032	6.03558e-15	4.39298e-14	Tim17b1	X	FBgn0260795	4809.1	-3.90617	0.584505	-6.68286	2.34e-11	1.64e-10	NaPi-III	X	FBgn0011586	4046.48	-2.27938	0.243439	-9.36324	7.73251e-21	5.59443e-20	e(r)
FBgn0039881	138.713	3.96214	0.507793	7.80266	6.06146e-15	4.40854e-14	CG1971	X	FBgn0053547	3256.37	-2.66571	0.399097	-6.67935	2.4e-11	1.68e-10	Rim	X	FBgn0262728	2543.93	-3.79391	0.405328	-9.36008	7.96745e-21	5.76013e-20	Pal2
FBgn0023540	583.728	2.84685	0.365014	7.79929	6.2255e-15	4.52448e-14	CG3630	X	FBgn0013972	661.007	-4.23706	0.634383	-6.67903	2.41e-11	1.68e-10	Gycalpha99B	X	FBgn0044324	1974.91	-2.15228	0.229963	-9.35925	8.03064e-21	5.80149e-20	Chro
FBgn0013679	23467.4	-5.31587	0.681759	-7.79729	6.32503e-15	4.5934e-14	ND1	X	FBgn0037933	2874.99	2.5621	0.383701	6.67733	2.43e-11	1.7e-10	Ho	X	FBgn0038463	955.033	2.59608	0.277913	9.34136	9.51084e-21	6.86572e-20	CG3534
FBgn0030300	414.736	5.08679	0.652512	7.7957	6.40506e-15	4.64807e-14	Sk1	X	FBgn0003326	903.197	-2.90414	0.43531	-6.67144	2.53e-11	1.77e-10	sca	X	FBgn0032726	977.688	5.78647	0.619563	9.3396	9.66953e-21	6.97511e-20	CG10621
FBgn0263256	377.811	2.92404	0.375117	7.79501	6.44017e-15	4.67008e-14	CG43394	X	FBgn0032161	849.852	2.99957	0.449955	6.66637	2.62e-11	1.83e-10	CG4594	X	FBgn0050222	124.123	8.22189	0.880388	9.33895	9.72985e-21	7.01342e-20	CG30222
FBgn0025838	84.8141	6.06783	0.778733	7.79192	6.59981e-15	4.78229e-14	CG2652	X	FBgn0039864	311.746	4.45608	0.668588	6.6649	2.65e-11	1.85e-10	CG11550	X	FBgn0019952	5859.12	3.28403	0.351734	9.33668	9.94044e-21	7.15991e-20	Orct
FBgn0052017	1640.4	-2.7198	0.349338	-7.78558	6.93932e-15	5.02458e-14	CG32017	X	FBgn0035521	2141.75	-3.88398	0.582774	-6.66463	2.65e-11	1.85e-10	VhaM9.7-a	X	FBgn0005658	587.3	-2.92831	0.3138	-9.33175	1.04134e-20	7.49501e-20	Ets65A
FBgn0263072	813.851	-3.66752	0.471109	-7.78485	6.97963e-15	5.05003e-14	CG43347	X	FBgn0039900	1167.86	-3.67361	0.551262	-6.66399	2.66e-11	1.85e-10	Syt7	X	FBgn0039238	432.004	4.33056	0.464121	9.33067	1.05207e-20	7.56664e-20	CG7016
FBgn0278608	8463.41	-3.09487	0.397641	-7.78307	7.07833e-15	5.11766e-14	Dsp1	X	FBgn0015380	2671.87	-2.7462	0.412171	-6.66277	2.69e-11	1.87e-10	drl	X	FBgn0038143	367.499	-2.94339	0.315807	-9.32022	1.16101e-20	8.34403e-20	CG9813
FBgn0029718	1619.24	-2.37513	0.305322	-7.7791	7.30448e-15	5.27726e-14	mRpL30	X	FBgn0265191	1319.26	2.66723	0.400532	6.65922	2.75e-11	1.91e-10	Glycogenin	X	FBgn0031736	1594.56	-2.48601	0.266792	-9.31816	1.18376e-20	8.50125e-20	CG11030
FBgn0039015	196.904	4.48681	0.576799	7.77881	7.32077e-15	5.28512e-14	Takl2	X	FBgn0250907	2791.62	2.70344	0.406135	6.65651	2.8e-11	1.95e-10	Cht10	X	FBgn0010015	401.344	4.39106	0.471371	9.31552	1.21362e-20	8.70923e-20	CanA1
FBgn0050362	128.666	5.09459	0.655045	7.77747	7.3988e-15	5.33751e-14	boly	X	FBgn0051952	66.6586	6.49664	0.976065	6.65595	2.81e-11	1.95e-10	CG31952	X	FBgn0032636	116.207	8.12795	0.872636	9.31425	1.22823e-20	8.80758e-20	CG5043
FBgn0011770	1340.06	2.116	0.272236	7.77268	7.68412e-15	5.53578e-14	Gip	X	FBgn0001227	1013.91	-3.45861	0.520468	-6.64519	3.03e-11	2.1e-10	Hsp67Ba	X	FBgn0036082	110.628	4.59213	0.493444	9.3063	1.32362e-20	9.48464e-20	CG12362
FBgn0035151	340.276	3.3194	0.427061	7.77267	7.68496e-15	5.53578e-14	CG17129	X	FBgn0259785	3629.5	-2.89046	0.435159	-6.64231	3.09e-11	2.14e-10	pzg	X	FBgn0031697	802.62	-3.4215	0.368134	-9.29419	1.48337e-20	1.06216e-19	CG14024
FBgn0020248	200.76	-3.19617	0.411222	-7.77237	7.70302e-15	5.5447e-14	stet	X	FBgn0028527	843.732	3.35476	0.505094	6.64186	3.1e-11	2.14e-10	CG18507	X	FBgn0033951	844.374	-2.61958	0.281955	-9.29076	1.53193e-20	1.09612e-19	CG10139
FBgn0031479	1214.16	-2.48155	0.31933	-7.77112	7.77963e-15	5.59573e-14	Prx6005	X	FBgn0038463	1005.03	2.61094	0.393126	6.64148	3.11e-11	2.15e-10	CG3534	X	FBgn0261508	104.889	6.89067	0.741849	9.2885	1.56471e-20	1.11875e-19	CG42656
FBgn0034733	155.579	4.71567	0.606921	7.76983	7.85919e-15	5.64879e-14	CG4752	X	FBgn0035815	151.591	5.34214	0.80544	6.63258	3.3e-11	2.28e-10	Snmp2	X	FBgn0031327	515.326	2.77914	0.299241	9.28731	1.58235e-20	1.13054e-19	CG5397
FBgn0034082	316.844	5.8024	0.746811	7.76956	7.87593e-15	5.65666e-14	CG10734	X	FBgn0085369	579.93	-2.91987	0.440397	-6.63009	3.35e-11	2.32e-10	Drgx	X	FBgn0037310	143.344	4.8168	0.518663	9.28695	1.58776e-20	1.13357e-19	Tim17b1
FBgn0035141	1157.81	-2.00779	0.25877	-7.75899	8.56084e-15	6.13956e-14	Cypl	X	FBgn0051777	750.844	3.69895	0.55846	6.62349	3.51e-11	2.42e-10	CG31777	X	FBgn0033949	477.318	3.83448	0.412967	9.28519	1.61418e-20	1.15158e-19	CG10131
FBgn0038818	750.302	-2.67126	0.344437	-7.75543	8.80434e-15	6.30956e-14	Nep4	X	FBgn0034588	723.418	4.16125	0.62843	6.62167	3.55e-11	2.45e-10	CG9394	X	FBgn0031127	110.349	6.01132	0.647442	9.28471	1.62143e-20	1.15591e-19	CG1835
FBgn0035370	8746.1	-1.97982	0.255302	-7.7548	8.84826e-15	6.33639e-14	Non2	X	FBgn0033668	417.335	3.06171	0.462433	6.62087	3.57e-11	2.46e-10	exp	X	FBgn0021895	2587.54	-2.37165	0.25553	-9.28128	1.67461e-20	1.19207e-19	ytr
FBgn0032987	22149.4	-2.69909	0.348083	-7.75415	8.89401e-15	6.35983e-14	RpL21	X	FBgn0038018	101.529	6.04472	0.913208	6.61922	3.61e-11	2.48e-10	Tim17a1	X	FBgn0026563	177.876	7.46427	0.804225	9.28132	1.67385e-20	1.19207e-19	CG1979
FBgn0033802	1321.93	-4.09572	0.528192	-7.75422	8.88852e-15	6.35983e-14	CG17724	X	FBgn0086909	2475.57	2.68618	0.405874	6.61828	3.63e-11	2.5e-10	CG31751	X	FBgn0000244	1160.61	2.60105	0.2803	9.2795	1.70274e-20	1.21121e-19	by
FBgn0037536	1998.35	1.92257	0.248038	7.75111	9.10958e-15	6.50922e-14	CG2698	X	FBgn0261015	63.677	6.39924	0.967366	6.61512	3.71e-11	2.55e-10	Pif1A	X	FBgn0050487	82.3817	6.05132	0.652518	9.2738	1.79638e-20	1.27689e-19	CG30487
FBgn0260657	834.762	-2.89788	0.373886	-7.7507	9.13883e-15	6.52535e-14	CG42540	X	FBgn0032633	1475.31	-2.85797	0.432215	-6.61239	3.78e-11	2.6e-10	Lrch	X	FBgn0003174	495.419	2.52928	0.272758	9.27301	1.8097e-20	1.28542e-19	pwn
FBgn0260758	187.168	4.48876	0.57917	7.75033	9.16567e-15	6.53974e-14	CG42556	X	FBgn0015774	1701.36	-3.28582	0.49734	-6.60678	3.93e-11	2.69e-10	NetB	X	FBgn0029133	3801.6	-2.36964	0.255606	-9.27065	1.85022e-20	1.31324e-19	REG
FBgn0040333	98.9557	5.25779	0.678775	7.746	9.48337e-15	6.76149e-14	brv3	X	FBgn0039319	165.007	5.55709	0.841179	6.60631	3.94e-11	2.7e-10	CG13659	X	FBgn0037060	693.931	-2.77998	0.299999	-9.26663	1.92127e-20	1.36267e-19	CG10508
FBgn0032336	321.218	-3.02478	0.390568	-7.74455	9.59206e-15	6.83274e-14	AstC	X	FBgn0260985	1217.07	-2.82621	0.427943	-6.60417	4e-11	2.74e-10	RfC4	X	FBgn0038431	153.584	6.35875	0.686528	9.26218	2.00291e-20	1.41954e-19	CG10405
FBgn0036145	1817.52	-2.64583	0.341641	-7.74448	9.59729e-15	6.83274e-14	CG7607	X	FBgn0265045	1106.98	3.3843	0.513039	6.59658	4.21e-11	2.88e-10	Strn-Mlck	X	FBgn0262605	265.079	5.10711	0.551632	9.25819	2.0793e-20	1.47261e-19	CG43131
FBgn0036416	13224.2	9.43024	1.21775	7.744	9.63403e-15	6.85391e-14	CG7924	X	FBgn0038829	9545.86	2.61472	0.396815	6.58926	4.42e-11	3.02e-10	CG17271	X	FBgn0033635	3823.73	2.75316	0.297543	9.25298	2.18313e-20	1.54502e-19	Prip
FBgn0046214	5378.01	-1.94053	0.250605	-7.74339	9.67985e-15	6.88149e-14	vig2	X	FBgn0033963	186.582	5.70918	0.868086	6.57675	4.81e-11	3.29e-10	CG12857	X	FBgn0085223	106.528	5.46107	0.590448	9.24903	2.26549e-20	1.60214e-19	CG34194
FBgn0013686	2.08726e+06	-3.38454	0.437197	-7.74145	9.82915e-15	6.98255e-14	lrRNA	X	FBgn0037153	1481.28	-2.65286	0.403572	-6.57344	4.92e-11	3.36e-10	olf413	X	FBgn0052192	326.574	3.88915	0.421077	9.23618	2.55449e-20	1.80521e-19	CG32192
FBgn0027552	2671.42	3.39627	0.439044	7.73559	1.02929e-14	7.30667e-14	CG10863	X	FBgn0030386	76.3345	6.6222	1.00756	6.57249	4.95e-11	3.38e-10	CG2574	X	FBgn0031822	2372.97	-2.67192	0.289306	-9.23561	2.56812e-20	1.81353e-19	CG9548
FBgn0085399	671.66	-3.74019	0.483516	-7.73541	1.03073e-14	7.31163e-14	CG34370	X	FBgn0032382	781.267	3.59082	0.547169	6.56255	5.29e-11	3.61e-10	Mal-B2	X	FBgn0004047	143.752	5.43065	0.588037	9.23522	2.57765e-20	1.81894e-19	Yp3
FBgn0050324	125.903	5.56202	0.719091	7.7348	1.03567e-14	7.3413e-14	CG30324	X	FBgn0040382	5364.3	2.65531	0.404741	6.56051	5.36e-11	3.66e-10	CG5273	X	FBgn0034251	87.9912	5.93089	0.642841	9.22607	2.8075e-20	1.9797e-19	ND-51L1
FBgn0040383	2363.19	3.72152	0.481309	7.73207	1.05809e-14	7.49481e-14	CG5254	X	FBgn0023129	2089.51	2.59645	0.395933	6.55781	5.46e-11	3.72e-10	aay	X	FBgn0040383	2757.27	3.0941	0.335858	9.21251	3.18591e-20	2.2449e-19	CG5254
FBgn0036501	1217.08	2.36038	0.305427	7.72811	1.09152e-14	7.726e-14	CG7272	X	FBgn0001994	4772.55	-2.86396	0.436766	-6.5572	5.48e-11	3.73e-10	crp	X	FBgn0017590	1200.98	-4.20422	0.457226	-9.19507	3.74764e-20	2.6388e-19	klg
FBgn0028969	5995.5	2.0245	0.262219	7.72063	1.15758e-14	8.18763e-14	deltaCOP	X	FBgn0037525	2701.87	-2.75121	0.419657	-6.55586	5.53e-11	3.76e-10	CG17816	X	FBgn0031644	94.2383	6.76326	0.735839	9.19122	3.88407e-20	2.73289e-19	CG15625
FBgn0030930	2130.89	2.81905	0.365235	7.71845	1.1775e-14	8.32256e-14	GalNAc-T2	X	FBgn0035131	638.596	3.39663	0.518897	6.54587	5.92e-11	4.02e-10	mthl9	X	FBgn0015872	245.915	3.98019	0.433364	9.18439	4.13855e-20	2.90985e-19	Drip
FBgn0052181	162.723	3.76002	0.487507	7.71276	1.23126e-14	8.69624e-14	CG32181	X	FBgn0036318	5865.78	2.34085	0.357628	6.54548	5.93e-11	4.03e-10	Wbp2	X	FBgn0039071	116.933	5.97674	0.651374	9.17559	4.49107e-20	3.15542e-19	CG4434
FBgn0035206	2394.86	1.9858	0.257623	7.70817	1.27638e-14	9.00842e-14	CG9186	X	FBgn0033926	43390.5	2.98464	0.456077	6.54415	5.98e-11	4.06e-10	Arc1	X	FBgn0032004	134.464	4.35076	0.474271	9.17357	4.57619e-20	3.21291e-19	CG8292
FBgn0038926	365.498	-3.32219	0.43101	-7.70791	1.27892e-14	9.01979e-14	CG13409	X	FBgn0051161	146.171	4.64622	0.710138	6.5427	6.04e-11	4.1e-10	CG31161	X	FBgn0029994	1211.91	3.92433	0.427847	9.17226	4.63213e-20	3.24984e-19	CG2254
FBgn0010408	6776.55	-2.33902	0.30353	-7.70607	1.29756e-14	9.14468e-14	RpS9	X	FBgn0086677	1309.26	-3.13436	0.479104	-6.54213	6.06e-11	4.11e-10	jeb	X	FBgn0262601	2470.68	-2.17904	0.237643	-9.16941	4.7562e-20	3.33448e-19	SmB
FBgn0034725	708.861	-2.77607	0.36033	-7.70426	1.31606e-14	9.26835e-14	CG6044	X	FBgn0261262	1322.01	-3.52662	0.539336	-6.53882	6.2e-11	4.2e-10	CG42613	X	FBgn0042133	114.018	5.61744	0.61279	9.16699	4.86402e-20	3.40762e-19	CG18810
FBgn0010228	17474	-2.11597	0.274735	-7.70187	1.34085e-14	9.43617e-14	HmgZ	X	FBgn0027550	565.184	-3.58785	0.548911	-6.5363	6.31e-11	4.27e-10	CG6495	X	FBgn0030484	2522.06	3.38843	0.369701	9.16534	4.93922e-20	3.45781e-19	GstT4
FBgn0034579	728.146	-2.44335	0.317359	-7.69899	1.3715e-14	9.64492e-14	mRpL54	X	FBgn0019952	6521.54	3.28503	0.502746	6.53418	6.4e-11	4.33e-10	Orct	X	FBgn0028936	417.879	5.66801	0.618683	9.16141	5.12256e-20	3.58358e-19	NimB5
FBgn0037714	108.165	5.75577	0.747672	7.69826	1.37931e-14	9.69284e-14	CG9396	X	FBgn0000489	366.903	3.38625	0.518583	6.5298	6.59e-11	4.45e-10	Pka-C3	X	FBgn0036294	426.136	-3.28061	0.358213	-9.15827	5.27353e-20	3.68655e-19	CG10654
FBgn0019650	1820.12	-2.76127	0.359219	-7.68688	1.50771e-14	1.05876e-13	toy	X	FBgn0259246	2142.03	-2.85536	0.437375	-6.5284	6.65e-11	4.49e-10	brp	X	FBgn0033250	1452.6	-2.99914	0.327582	-9.1554	5.41581e-20	3.78329e-19	CG14762
FBgn0030136	16382.7	-2.8035	0.364763	-7.68582	1.52025e-14	1.0668e-13	RpS28b	X	FBgn0032330	850.751	2.73962	0.419898	6.52449	6.82e-11	4.6e-10	Samuel	X	FBgn0261788	5279.24	-2.40337	0.262771	-9.14624	5.89484e-20	4.11497e-19	Ank2
FBgn0044452	1031.45	2.61913	0.340968	7.68147	1.57275e-14	1.10284e-13	Atg2	X	FBgn0027348	328.305	3.88484	0.595957	6.51867	7.09e-11	4.78e-10	bgm	X	FBgn0036641	1341.34	-1.89624	0.207345	-9.14531	5.9457e-20	4.1475e-19	Smn
FBgn0037626	95.1576	4.59142	0.597758	7.68106	1.57773e-14	1.10554e-13	CG8236	X	FBgn0267668	3724.55	-2.65822	0.407866	-6.51738	7.15e-11	4.82e-10	CR46006	X	FBgn0030421	550.41	-3.46815	0.37955	-9.13753	6.38939e-20	4.45381e-19	CG3812
FBgn0034468	155.034	4.06359	0.529352	7.67652	1.63463e-14	1.14377e-13	Obp56a	X	FBgn0036046	404.462	-4.3138	0.662299	-6.51337	7.35e-11	4.95e-10	Ilp2	X	FBgn0035718	233.012	4.56104	0.500014	9.12183	7.38675e-20	5.14534e-19	CG14820
FBgn0262687	105.371	4.67066	0.608755	7.67248	1.68698e-14	1.17956e-13	CR43157	X	FBgn0038868	1636.02	2.56676	0.394809	6.50127	7.96e-11	5.36e-10	CG5862	X	FBgn0037069	435.913	6.34815	0.696057	9.12016	7.50146e-20	5.22151e-19	Cpr78Cc
FBgn0035335	827.674	-2.37004	0.309026	-7.66939	1.72813e-14	1.20747e-13	mRpL23	X	FBgn0035165	11899.6	2.26529	0.348535	6.49946	8.06e-11	5.42e-10	CG13887	X	FBgn0030215	130.998	7.72893	0.847627	9.11832	7.62992e-20	5.30713e-19	CG15296
FBgn0030309	3152.89	2.05522	0.26798	7.6693	1.72942e-14	1.2075e-13	CG1572	X	FBgn0037386	228.546	5.71404	0.879181	6.49928	8.07e-11	5.42e-10	CG1208	X	FBgn0001105	13789.9	-1.80135	0.197563	-9.11789	7.66036e-20	5.3245e-19	Gbeta13F
FBgn0013269	4431.89	-2.15051	0.280491	-7.66695	1.76136e-14	1.22893e-13	FK506-bp1	X	FBgn0023179	1289.83	-4.16803	0.641724	-6.49504	8.3e-11	5.57e-10	amon	X	FBgn0052354	675.761	-3.99238	0.438145	-9.112	8.08757e-20	5.61743e-19	CG32354
FBgn0033128	152.24	4.53816	0.591972	7.66618	1.77193e-14	1.23543e-13	Tsp42Eg	X	FBgn0029747	126.556	4.51427	0.695047	6.49491	8.31e-11	5.57e-10	CG5062	X	FBgn0015239	1629.75	1.87314	0.205589	9.11112	8.15382e-20	5.6594e-19	Hr78
FBgn0035006	149.897	3.80049	0.495789	7.66554	1.78079e-14	1.24071e-13	CG4563	X	FBgn0037325	63.0982	5.64151	0.86889	6.49277	8.43e-11	5.65e-10	CG12147	X	FBgn0260484	1815.16	-1.96804	0.216023	-9.11033	8.21354e-20	5.69679e-19	HIP
FBgn0022338	1783.98	-2.08576	0.272174	-7.66334	1.81161e-14	1.26129e-13	dnk	X	FBgn0030105	2516.32	8.48657	1.30714	6.49245	8.45e-11	5.66e-10	CG15369	X	FBgn0267665	475.606	-4.33879	0.476264	-9.11006	8.2333e-20	5.70643e-19	CR46003
FBgn0024183	4259.02	-1.82895	0.238677	-7.66287	1.81821e-14	1.26498e-13	vig	X	FBgn0261041	787.698	-2.83867	0.43732	-6.49106	8.52e-11	5.71e-10	stj	X	FBgn0037463	127.333	8.67019	0.952978	9.098	9.20136e-20	6.37284e-19	djl
FBgn0000721	1329.66	2.79246	0.364511	7.66082	1.84756e-14	1.28449e-13	for	X	FBgn0031333	92.6554	5.31952	0.819537	6.49088	8.53e-11	5.71e-10	CG5561	X	FBgn0261113	6451.39	2.34186	0.257491	9.09494	9.46412e-20	6.55017e-19	Xrp1
FBgn0013674	139485	-2.69532	0.351935	-7.65857	1.8801e-14	1.3053e-13	COX1	X	FBgn0032783	565.05	3.19175	0.491857	6.48919	8.63e-11	5.77e-10	CG10237	X	FBgn0032422	585.556	3.52698	0.387931	9.09179	9.74245e-20	6.73801e-19	atilla
FBgn0030854	3908.28	-1.94376	0.253802	-7.65857	1.88017e-14	1.3053e-13	CG8289	X	FBgn0033794	72.6556	5.4452	0.839424	6.48683	8.77e-11	5.86e-10	CG13326	X	FBgn0038034	903.598	2.56742	0.282585	9.08545	1.03271e-19	7.13726e-19	Cyp9f3Psi
FBgn0039611	73.7504	6.89232	0.900038	7.65782	1.89118e-14	1.31201e-13	CG14528	X	FBgn0032650	173.998	5.0616	0.780469	6.48533	8.85e-11	5.91e-10	CG7094	X	FBgn0086708	889.407	2.83377	0.311917	9.08502	1.03681e-19	7.16055e-19	stv
FBgn0037203	612.125	3.16982	0.413984	7.65688	1.90499e-14	1.32066e-13	slif	X	FBgn0086913	482.222	-4.44541	0.68657	-6.47482	9.49e-11	6.33e-10	Rab26	X	FBgn0029882	2269.99	-2.13075	0.234586	-9.08304	1.05587e-19	7.28703e-19	CG3226
FBgn0031414	443.373	-3.00677	0.392957	-7.65166	1.98396e-14	1.37443e-13	eys	X	FBgn0263006	19991.7	2.95193	0.455956	6.47416	9.53e-11	6.36e-10	SERCA	X	FBgn0266095	1927.25	-5.58454	0.614914	-9.08182	1.06772e-19	7.36357e-19	CR44832
FBgn0031692	156.458	5.03609	0.658207	7.65123	1.9906e-14	1.37806e-13	TpnC25D	X	FBgn0035490	179.478	5.0573	0.781363	6.47242	9.64e-11	6.43e-10	CG1136	X	FBgn0260462	9304.12	1.77245	0.195293	9.07585	1.12799e-19	7.77369e-19	CG12163
FBgn0036815	1311.17	-2.73072	0.356946	-7.65023	2.00621e-14	1.38787e-13	HipHop	X	FBgn0083977	147.365	4.24921	0.656587	6.47166	9.69e-11	6.45e-10	CG34141	X	FBgn0028538	1293.53	2.07779	0.229008	9.073	1.15785e-19	7.97383e-19	Sec71
FBgn0040817	1324.26	3.08253	0.402983	7.64927	2.02117e-14	1.39723e-13	CG14132	X	FBgn0259736	873.07	3.02447	0.467396	6.4709	9.74e-11	6.48e-10	CG42390	X	FBgn0034247	125.958	5.54362	0.611209	9.06993	1.19088e-19	8.19554e-19	CG6484
FBgn0031627	788.75	-4.19108	0.548213	-7.64499	2.08963e-14	1.44354e-13	CG15630	X	FBgn0260632	772.11	3.55239	0.54898	6.47089	9.74e-11	6.48e-10	dl	X	FBgn0039593	199.694	5.17147	0.570194	9.06968	1.1937e-19	8.20912e-19	Sid
FBgn0037489	622.839	-2.38583	0.312213	-7.64169	2.14391e-14	1.48e-13	CG1234	X	FBgn0039052	87.3979	5.52365	0.853927	6.46854	9.9e-11	6.57e-10	CG6733	X	FBgn0029728	315.736	6.15547	0.679034	9.06505	1.24552e-19	8.55945e-19	CG2861
FBgn0027335	1709.5	2.53376	0.3316	7.641	2.15533e-14	1.48683e-13	Rip11	X	FBgn0016983	2662.88	-2.73006	0.422114	-6.46759	9.96e-11	6.61e-10	smid	X	FBgn0034406	2235.67	2.6797	0.295719	9.06165	1.28488e-19	8.82371e-19	Jheh3
FBgn0031959	162.546	3.99013	0.522245	7.64035	2.16626e-14	1.49332e-13	spz3	X	FBgn0005558	538.773	-2.88685	0.446685	-6.46283	1.03e-10	6.82e-10	ey	X	FBgn0036096	921.367	-2.03009	0.224073	-9.05993	1.30536e-19	8.95798e-19	CG8003
FBgn0039674	997.4	2.40645	0.315094	7.63723	2.21938e-14	1.52885e-13	CG1907	X	FBgn0032645	81.1909	5.89791	0.912922	6.46048	1.04e-10	6.92e-10	CG15142	X	FBgn0010040	212.898	5.88111	0.649216	9.0588	1.31899e-19	9.0452e-19	GstD4
FBgn0031939	1175.24	4.47665	0.586346	7.63482	2.26132e-14	1.55665e-13	CG13796	X	FBgn0086708	808.37	2.97074	0.460084	6.45695	1.07e-10	7.08e-10	stv	X	FBgn0038839	1391.03	-2.80707	0.309949	-9.05656	1.34625e-19	9.22564e-19	Ktl
FBgn0000150	21727.9	-1.88082	0.246361	-7.6344	2.26879e-14	1.56069e-13	awd	X	FBgn0051140	3209.2	-2.92128	0.452672	-6.45341	1.09e-10	7.24e-10	CG31140	X	FBgn0259145	596.582	-2.89861	0.32034	-9.04854	1.44887e-19	9.92186e-19	CG42260
FBgn0013673	4439.03	-3.21017	0.420697	-7.6306	2.33668e-14	1.60626e-13	ATP8	X	FBgn0053543	435.077	-3.91478	0.607497	-6.44411	1.16e-10	7.69e-10	CG33543	X	FBgn0037635	259.411	4.32288	0.477811	9.04726	1.46596e-19	1.00318e-18	CG9837
FBgn0262733	2547.69	-2.47473	0.324422	-7.62811	2.38212e-14	1.63635e-13	Src64B	X	FBgn0038163	349.603	5.17601	0.80344	6.44231	1.18e-10	7.78e-10	CG10841	X	FBgn0039350	2251.13	-2.523	0.278953	-9.04453	1.50308e-19	1.02786e-18	jigr1
FBgn0004168	310.205	-4.56493	0.598585	-7.6262	2.41774e-14	1.65965e-13	5-HT1A	X	FBgn0053200	1153.03	-3.82478	0.594212	-6.43673	1.22e-10	8.06e-10	VepD	X	FBgn0033130	130.073	5.18479	0.573603	9.03898	1.58144e-19	1.08069e-18	Tsp42Ei
FBgn0283521	12839.4	-1.70218	0.223253	-7.62447	2.45043e-14	1.68091e-13	lola	X	FBgn0031866	766.117	-2.63811	0.409903	-6.43592	1.23e-10	8.1e-10	Nlg2	X	FBgn0032433	609.035	3.62081	0.400891	9.0319	1.68711e-19	1.15209e-18	Oatp33Ea
FBgn0259680	182.081	4.34877	0.570514	7.62255	2.48717e-14	1.70491e-13	Pkcdelta	X	FBgn0010591	4636.41	2.51757	0.391281	6.43419	1.24e-10	8.19e-10	Sply	X	FBgn0052017	1455.81	-3.79457	0.420301	-9.02822	1.74488e-19	1.19071e-18	CG32017
FBgn0033458	195.908	6.29711	0.826208	7.62169	2.50369e-14	1.71504e-13	CG18446	X	FBgn0038818	739.948	-2.82607	0.439265	-6.43363	1.25e-10	8.21e-10	Nep4	X	FBgn0033860	111.689	6.93114	0.767886	9.02626	1.7764e-19	1.21136e-18	S-Lap5
FBgn0035904	3429.43	2.76719	0.363287	7.61711	2.59428e-14	1.77585e-13	GstO3	X	FBgn0085194	763.486	5.40595	0.840365	6.43286	1.25e-10	8.25e-10	CG34165	X	FBgn0024491	1808.23	-2.49472	0.2764	-9.02575	1.78464e-19	1.21613e-18	Bin1
FBgn0029084	76.6473	5.81409	0.763663	7.61342	2.66928e-14	1.8259e-13	gom	X	FBgn0029082	1194.38	-3.33543	0.519149	-6.4248	1.32e-10	8.69e-10	hbs	X	FBgn0264959	3142.23	-2.13704	0.236787	-9.02518	1.79394e-19	1.22161e-18	Src42A
FBgn0025720	975.199	2.15133	0.282735	7.60901	2.76212e-14	1.8881e-13	Ate1	X	FBgn0031741	439.479	3.45819	0.53878	6.41855	1.38e-10	9.05e-10	CG11034	X	FBgn0029123	2219.91	-2.7437	0.30415	-9.02089	1.86569e-19	1.26958e-18	SoxN
FBgn0032783	412.775	2.90567	0.382077	7.60494	2.85043e-14	1.9471e-13	CG10237	X	FBgn0020641	76.6082	5.82086	0.907021	6.41756	1.38e-10	9.1e-10	Lcp65Ad	X	FBgn0264006	1066.88	-2.7446	0.304319	-9.01882	1.90134e-19	1.29294e-18	dysc
FBgn0263598	12541.9	2.63267	0.346203	7.60441	2.86211e-14	1.95371e-13	Vha68-2	X	FBgn0016123	868.86	3.38771	0.528039	6.41565	1.4e-10	9.21e-10	Alp4	X	FBgn0033112	92.2411	6.42464	0.712731	9.01412	1.98452e-19	1.34856e-18	Spn42Db
FBgn0035692	22262.4	-3.04561	0.400565	-7.60329	2.8869e-14	1.96926e-13	CG13298	X	FBgn0033074	236.408	4.49761	0.701239	6.41381	1.42e-10	9.32e-10	tomboy40	X	FBgn0002930	478.433	4.51863	0.501421	9.01164	2.03001e-19	1.37851e-18	nec
FBgn0036318	4405.77	2.10966	0.27771	7.59661	3.03987e-14	2.07216e-13	Wbp2	X	FBgn0025878	2165.62	-4.05148	0.632071	-6.40985	1.46e-10	9.56e-10	wrapper	X	FBgn0033782	472.791	5.03871	0.559259	9.00961	2.06782e-19	1.40321e-18	sug
FBgn0085753	1311.14	3.27225	0.430835	7.59514	3.07469e-14	2.09329e-13	28SrRNA-Psi:CR40596	X	FBgn0033387	164.275	5.04487	0.787129	6.4092	1.46e-10	9.59e-10	CG8008	X	FBgn0001216	96.6706	7.2268	0.802231	9.00837	2.09136e-19	1.41819e-18	Hsc70-1
FBgn0086904	12926.7	-2.11234	0.278118	-7.59512	3.07516e-14	2.09329e-13	Nacalpha	X	FBgn0001311	732.664	2.94991	0.460436	6.40678	1.49e-10	9.74e-10	kkv	X	FBgn0011481	3314.23	-1.95987	0.217654	-9.00453	2.16598e-19	1.46777e-18	Ssdp
FBgn0038432	2364.6	-2.40538	0.316797	-7.59282	3.13018e-14	2.12926e-13	CG14883	X	FBgn0037844	1075.87	-4.12255	0.644082	-6.40066	1.55e-10	1.01e-09	CG4570	X	FBgn0034543	2162.86	2.44234	0.271256	9.0038	2.18029e-19	1.47644e-18	galla-1
FBgn0035375	1200.39	2.52457	0.332763	7.58669	3.28183e-14	2.23087e-13	pgant6	X	FBgn0037664	730.893	3.35452	0.524113	6.40038	1.55e-10	1.01e-09	CG8420	X	FBgn0036833	2289.89	9.30532	1.03452	8.99481	2.36638e-19	1.60134e-18	CG3819
FBgn0033555	2696.61	-2.14027	0.282268	-7.5824	3.3921e-14	2.30422e-13	RpS15Ab	X	FBgn0063495	105.567	4.65147	0.727431	6.39438	1.61e-10	1.05e-09	GstE5	X	FBgn0032221	559.931	-4.3526	0.484114	-8.99085	2.45332e-19	1.65902e-18	Schip1
FBgn0031306	2211.82	-3.96865	0.523411	-7.58228	3.39548e-14	2.30492e-13	CG4577	X	FBgn0250871	1542.25	3.40137	0.532121	6.3921	1.64e-10	1.07e-09	pot	X	FBgn0086917	2516.99	-3.91461	0.435541	-8.98792	2.51946e-19	1.70256e-18	spok
FBgn0033089	642.097	-2.4797	0.327254	-7.57729	3.52844e-14	2.39351e-13	CG17266	X	FBgn0031414	450.305	-3.79159	0.593223	-6.39151	1.64e-10	1.07e-09	eys	X	FBgn0037007	13297.6	2.11045	0.234843	8.98667	2.54844e-19	1.72095e-18	CG5059
FBgn0261649	1392.27	-2.62805	0.346942	-7.57491	3.5938e-14	2.43616e-13	tinc	X	FBgn0032590	194.013	3.47457	0.543638	6.39133	1.64e-10	1.07e-09	CG4631	X	FBgn0030706	780.433	-2.85231	0.317681	-8.97853	2.74409e-19	1.85178e-18	CG8909
FBgn0038976	4564.29	-2.12306	0.280371	-7.57233	3.66577e-14	2.48322e-13	Pfdn5	X	FBgn0032297	11097.2	-2.59586	0.4067	-6.38275	1.74e-10	1.13e-09	CG17124	X	FBgn0027335	1772.43	2.16976	0.241979	8.96674	3.05408e-19	2.05954e-18	Rip11
FBgn0038420	814.319	2.09283	0.276503	7.56893	3.76303e-14	2.54713e-13	CG10311	X	FBgn0037387	606.823	3.63973	0.57082	6.37631	1.81e-10	1.18e-09	CG1213	X	FBgn0051406	106.422	6.71154	0.748613	8.9653	3.09425e-19	2.08519e-18	CG31406
FBgn0051184	2753.7	-2.70151	0.356924	-7.56885	3.76532e-14	2.54713e-13	LSm3	X	FBgn0266408	80.8622	6.20592	0.97388	6.37237	1.86e-10	1.21e-09	CR45048	X	FBgn0259139	4870.83	-1.86407	0.207986	-8.96244	3.17566e-19	2.13857e-18	glo
FBgn0037518	357.933	2.74663	0.363068	7.56505	3.87711e-14	2.62094e-13	CG2641	X	FBgn0032262	103.414	4.63876	0.728606	6.36663	1.93e-10	1.26e-09	CG7384	X	FBgn0037217	414.747	3.4425	0.384149	8.96138	3.20654e-19	2.15787e-18	CG14636
FBgn0031178	201.25	6.40617	0.846983	7.56352	3.92319e-14	2.65025e-13	CG10918	X	FBgn0038476	6734.13	-2.40784	0.378321	-6.36453	1.96e-10	1.27e-09	kuk	X	FBgn0038716	1868.07	4.98095	0.555895	8.96023	3.23992e-19	2.17883e-18	CG7342
FBgn0259789	2044.51	-2.06703	0.273298	-7.56326	3.93093e-14	2.65365e-13	zld	X	FBgn0259110	1102.59	-3.7186	0.58493	-6.35733	2.05e-10	1.33e-09	mmd	X	FBgn0032810	96.9036	5.55365	0.620504	8.95024	3.54725e-19	2.38386e-18	CG13077
FBgn0033250	1207.04	-2.56614	0.339391	-7.56101	3.9995e-14	2.69807e-13	CG14762	X	FBgn0267665	686.253	-3.22275	0.507139	-6.35477	2.09e-10	1.36e-09	CR46003	X	FBgn0004055	1753.22	-3.37047	0.376742	-8.94637	3.67377e-19	2.46718e-18	uzip
FBgn0035903	530.736	-2.82381	0.373568	-7.55901	4.0614e-14	2.73794e-13	CG6765	X	FBgn0259195	82.0767	4.85678	0.764691	6.35129	2.14e-10	1.39e-09	CG42299	X	FBgn0023495	189.598	6.33153	0.708129	8.94122	3.84894e-19	2.58304e-18	Lip3
FBgn0266020	141.106	-5.69615	0.753603	-7.55856	4.07556e-14	2.7456e-13	CR44785	X	FBgn0262728	2853.63	-3.7693	0.594114	-6.34441	2.23e-10	1.45e-09	Pal2	X	FBgn0004108	5232.16	-3.84122	0.429733	-8.93864	3.94002e-19	2.64234e-18	Nrt
FBgn0023441	1613.55	3.72762	0.493382	7.55524	4.18077e-14	2.81453e-13	fus	X	FBgn0028670	5814.76	3.33109	0.52541	6.33999	2.3e-10	1.49e-09	Vha100-2	X	FBgn0031853	184.516	4.67562	0.523238	8.93593	4.0377e-19	2.70598e-18	TTLL3B
FBgn0037472	3194.44	-1.96278	0.25992	-7.55148	4.30337e-14	2.89507e-13	CG10098	X	FBgn0022893	31012.8	-2.85969	0.451329	-6.33615	2.36e-10	1.53e-09	Df31	X	FBgn0259227	1010.41	3.12607	0.34993	8.93341	4.13094e-19	2.76656e-18	CG42327
FBgn0028408	1014.01	-3.52045	0.466297	-7.54981	4.35904e-14	2.93051e-13	Drep2	X	FBgn0262477	1033.79	-3.73441	0.59013	-6.32811	2.48e-10	1.61e-09	FoxP	X	FBgn0026238	3814.94	-1.69251	0.189472	-8.93275	4.1555e-19	2.7811e-18	gus
FBgn0086711	249.978	4.02863	0.534138	7.54231	4.61726e-14	3.10198e-13	mol	X	FBgn0025716	3545.79	-2.16793	0.34268	-6.32639	2.51e-10	1.62e-09	Bap55	X	FBgn0085194	256.06	4.56904	0.511854	8.92644	4.39932e-19	2.94225e-18	CG34165
FBgn0063491	187.165	4.42787	0.587305	7.5393	4.72516e-14	3.17228e-13	GstE9	X	FBgn0000028	375.995	-3.44643	0.5448	-6.32604	2.52e-10	1.63e-09	acj6	X	FBgn0036815	941.374	-3.13568	0.351305	-8.92579	4.42516e-19	2.95751e-18	HipHop
FBgn0010316	1897.68	-3.17529	0.421178	-7.53907	4.7335e-14	3.1757e-13	dap	X	FBgn0036986	840.956	-2.59793	0.410703	-6.32556	2.52e-10	1.63e-09	CG5282	X	FBgn0086909	1702.01	2.25032	0.252184	8.92334	4.52431e-19	3.02169e-18	CG31751
FBgn0050022	971.947	2.33736	0.31022	7.53453	4.90087e-14	3.28574e-13	CG30022	X	FBgn0032515	1515.38	-2.43541	0.385018	-6.32544	2.53e-10	1.63e-09	loqs	X	FBgn0035987	2668.1	-1.6227	0.18191	-8.92032	4.64924e-19	3.103e-18	CG3689
FBgn0040600	383.053	2.5254	0.335344	7.53076	5.04467e-14	3.37983e-13	CG13631	X	FBgn0031693	350.07	4.07394	0.644614	6.31997	2.62e-10	1.69e-09	Cyp4ac1	X	FBgn0020255	10972.5	-2.01156	0.225733	-8.91125	5.04619e-19	3.36562e-18	Ran
FBgn0017579	28964.8	-2.2765	0.302419	-7.52763	5.16692e-14	3.45936e-13	RpL14	X	FBgn0031751	954.234	3.34851	0.530218	6.31535	2.7e-10	1.74e-09	CG9016	X	FBgn0029174	3638.36	-2.02044	0.226777	-8.90938	5.13172e-19	3.42033e-18	FKBP59
FBgn0033439	596.395	6.13775	0.815475	7.52659	5.20808e-14	3.48453e-13	CG1773	X	FBgn0010651	2727	2.90789	0.461996	6.29419	3.09e-10	1.99e-09	MFS14	X	FBgn0023178	431.158	-3.72566	0.418342	-8.90577	5.30177e-19	3.53125e-18	Pdf
FBgn0023023	1686.19	-2.43607	0.32371	-7.52547	5.25299e-14	3.51217e-13	CRMP	X	FBgn0039687	618.798	-2.96492	0.471133	-6.29318	3.11e-10	2e-09	CG7593	X	FBgn0038976	3092.26	-2.06304	0.231663	-8.90536	5.32137e-19	3.54188e-18	Pfdn5
FBgn0040747	188.504	5.91476	0.785992	7.52521	5.26348e-14	3.51678e-13	CG12853	X	FBgn0033031	1284.01	-2.99698	0.47635	-6.29154	3.14e-10	2.02e-09	CG8245	X	FBgn0030160	2326.22	2.50628	0.281522	8.9026	5.45539e-19	3.6286e-18	CG9691
FBgn0283477	7077.48	-1.84285	0.244897	-7.52501	5.27144e-14	3.51969e-13	SF2	X	FBgn0003346	1792.93	-2.69008	0.427759	-6.28878	3.2e-10	2.06e-09	RanGAP	X	FBgn0030011	705.641	-3.01252	0.33846	-8.90066	5.5516e-19	3.69007e-18	Gbeta5
FBgn0001259	219.455	3.68132	0.489249	7.52442	5.29542e-14	3.53329e-13	in	X	FBgn0038720	4166.94	3.02475	0.481468	6.28235	3.34e-10	2.14e-09	CG6231	X	FBgn0031410	128.44	7.26796	0.816687	8.89933	5.61857e-19	3.73203e-18	CG17237
FBgn0058470	573.493	-2.60657	0.346455	-7.52354	5.33109e-14	3.55467e-13	CG40470	X	FBgn0034737	184.996	5.40658	0.860832	6.28064	3.37e-10	2.16e-09	CG11362	X	FBgn0040859	516.849	4.74794	0.533578	8.89832	5.67e-19	3.76363e-18	CR32658
FBgn0035780	222.516	3.42401	0.455357	7.51939	5.50326e-14	3.66696e-13	CG18417	X	FBgn0263111	1142.98	-3.3003	0.525513	-6.28014	3.38e-10	2.17e-09	cac	X	FBgn0267689	117.221	5.9043	0.66448	8.88559	6.35848e-19	4.21775e-18	CG46025
FBgn0038476	5548.81	-2.17898	0.289995	-7.51384	5.74163e-14	3.82319e-13	kuk	X	FBgn0036007	8563.74	-2.59964	0.414261	-6.27536	3.49e-10	2.24e-09	path	X	FBgn0050419	370.949	-5.03532	0.566718	-8.88507	6.38828e-19	4.23463e-18	CG30419
FBgn0029676	1453.89	-2.32423	0.309546	-7.50851	5.98021e-14	3.97934e-13	HIP-R	X	FBgn0052017	2027.87	-3.38231	0.539187	-6.27298	3.54e-10	2.27e-09	CG32017	X	FBgn0037326	343.205	-2.83016	0.31855	-8.88453	6.41903e-19	4.25212e-18	CG14669
FBgn0051176	330.126	3.89133	0.518605	7.50346	6.21554e-14	4.13312e-13	CG31176	X	FBgn0266521	7427.98	-2.43454	0.388099	-6.27298	3.54e-10	2.27e-09	stai	X	FBgn0266521	5125.26	-2.2496	0.253273	-8.88212	6.55997e-19	4.34252e-18	stai
FBgn0040233	557.424	3.05456	0.407188	7.50159	6.30468e-14	4.18955e-13	cana	X	FBgn0052698	1003.45	2.55973	0.408162	6.27136	3.58e-10	2.29e-09	CG32698	X	FBgn0000667	7697.57	2.23527	0.251694	8.88089	6.63255e-19	4.38759e-18	Actn
FBgn0034828	102.114	6.38482	0.851589	7.49754	6.50288e-14	4.31832e-13	CG13545	X	FBgn0039862	632.052	-3.16443	0.504688	-6.27007	3.61e-10	2.31e-09	kek6	X	FBgn0250907	1928.37	3.14031	0.353816	8.87557	6.95778e-19	4.5996e-18	Cht10
FBgn0039251	186.226	4.98702	0.665232	7.49665	6.54675e-14	4.3445e-13	Trf4-2	X	FBgn0029084	86.113	4.47424	0.71365	6.26951	3.62e-10	2.31e-09	gom	X	FBgn0034476	1228.24	-2.2805	0.257197	-8.86676	7.53036e-19	4.97474e-18	Toll-7
FBgn0038311	236.585	3.66821	0.489379	7.49565	6.59727e-14	4.37505e-13	CG14864	X	FBgn0032713	1665.44	3.0493	0.486404	6.26906	3.63e-10	2.32e-09	CG17323	X	FBgn0033101	1266.13	2.34134	0.264216	8.86145	7.89774e-19	5.2139e-18	CG9436
FBgn0033476	2063.04	1.84787	0.246717	7.48983	6.89635e-14	4.57029e-13	oys	X	FBgn0030157	650.796	3.56877	0.569479	6.26672	3.69e-10	2.35e-09	CG1468	X	FBgn0033862	88.8452	5.30481	0.599957	8.84199	9.40324e-19	6.20359e-18	CG6209
FBgn0034294	1413.3	11.006	1.46963	7.48893	6.9435e-14	4.59842e-13	Muc55B	X	FBgn0038530	220.148	5.56075	0.887378	6.26649	3.69e-10	2.35e-09	AttD	X	FBgn0265182	776.525	-3.72348	0.421227	-8.83961	9.60535e-19	6.33263e-18	CG44247
FBgn0002632	365.124	-2.69951	0.360732	-7.48342	7.24137e-14	4.79244e-13	E(spl)m6-BFM	X	FBgn0267458	102.967	5.93152	0.949026	6.25012	4.1e-10	2.61e-09	CR45808	X	FBgn0051370	339.294	3.65713	0.414036	8.83289	1.02008e-18	6.72062e-18	CG31370
FBgn0001994	3737.15	-2.36468	0.316269	-7.47681	7.61472e-14	5.03612e-13	crp	X	FBgn0031296	66.4456	6.00397	0.96083	6.24873	4.14e-10	2.63e-09	CG4415	X	FBgn0023527	357.837	-2.73529	0.309712	-8.83172	1.03082e-18	6.78681e-18	CG3071
FBgn0030932	308.052	2.66848	0.357069	7.47329	7.82126e-14	5.16922e-13	Ggt-1	X	FBgn0034094	160.811	4.08036	0.653307	6.2457	4.22e-10	2.68e-09	Tsf3	X	FBgn0039316	257.794	4.96686	0.562902	8.82365	1.10785e-18	7.28903e-18	CG11893
FBgn0261836	19190.3	2.90293	0.388807	7.46626	8.25091e-14	5.4495e-13	Msp300	X	FBgn0037759	152.109	4.56492	0.731255	6.24259	4.3e-10	2.74e-09	CG8526	X	FBgn0002525	5627.85	-2.41439	0.273647	-8.82301	1.11424e-18	7.32616e-18	Lam
FBgn0012037	4913.37	2.69731	0.361295	7.46569	8.28649e-14	5.46931e-13	Ance	X	FBgn0032895	785.998	-2.63575	0.422261	-6.24199	4.32e-10	2.74e-09	twit	X	FBgn0031786	79.3646	6.7265	0.762892	8.81712	1.17446e-18	7.71685e-18	CG13989
FBgn0015609	4091.78	-3.70122	0.495809	-7.46501	8.32938e-14	5.49391e-13	CadN	X	FBgn0011592	2206.57	-2.88566	0.462476	-6.2396	4.39e-10	2.78e-09	fra	X	FBgn0034467	242.408	8.48919	0.963382	8.81186	1.23087e-18	8.08206e-18	CG15128
FBgn0033130	140.868	4.74836	0.636125	7.46451	8.3612e-14	5.51118e-13	Tsp42Ei	X	FBgn0024913	920.737	-3.48112	0.559653	-6.22014	4.97e-10	3.15e-09	Actbeta	X	FBgn0038460	618.08	2.65153	0.300914	8.81159	1.23384e-18	8.09607e-18	CG18622
FBgn0015371	1358.01	-2.15717	0.289014	-7.4639	8.39958e-14	5.53274e-13	chn	X	FBgn0013269	4329.02	-2.15371	0.346304	-6.21912	5e-10	3.17e-09	FK506-bp1	X	FBgn0053704	76.8612	6.70942	0.762533	8.79885	1.38226e-18	9.06383e-18	CG33704
FBgn0004107	1070.71	-2.24282	0.300685	-7.45902	8.71692e-14	5.7379e-13	Cdk2	X	FBgn0051638	790.775	-2.84285	0.457451	-6.21454	5.15e-10	3.26e-09	CG31638	X	FBgn0012344	635.191	-3.33108	0.378751	-8.79493	1.43141e-18	9.37986e-18	Dh44
FBgn0032840	711.794	-3.56342	0.477814	-7.45776	8.80037e-14	5.78894e-13	sNPF	X	FBgn0034628	348.134	2.7125	0.436653	6.21202	5.23e-10	3.31e-09	Acox57D-p	X	FBgn0023167	1114.81	-1.91719	0.218039	-8.7929	1.4575e-18	9.54434e-18	SmD3
FBgn0037534	686.989	4.56796	0.612579	7.45692	8.85673e-14	5.82209e-13	CG2781	X	FBgn0033706	60.873	5.61176	0.903551	6.21079	5.27e-10	3.34e-09	Vha36-2	X	FBgn0031741	944.14	4.77223	0.543501	8.78054	1.62698e-18	1.0647e-17	CG11034
FBgn0010548	3558.04	1.75972	0.236012	7.45607	8.91446e-14	5.85611e-13	Aldh-III	X	FBgn0030542	264.56	4.55606	0.733926	6.20779	5.37e-10	3.39e-09	CG12481	X	FBgn0035692	11627.6	-2.59533	0.295928	-8.77015	1.7843e-18	1.16687e-17	CG13298
FBgn0011760	13099.7	-1.92259	0.257997	-7.45198	9.19477e-14	6.03619e-13	ctp	X	FBgn0261446	227.541	3.29847	0.531343	6.2078	5.37e-10	3.39e-09	CG13377	X	FBgn0022160	1286.5	2.12561	0.242379	8.76977	1.79025e-18	1.16998e-17	Gpo-1
FBgn0259145	747.346	-3.02067	0.405449	-7.45018	9.32141e-14	6.11522e-13	CG42260	X	FBgn0051373	215.948	3.48588	0.562124	6.20126	5.6e-10	3.54e-09	CG31373	X	FBgn0053116	2246.53	-2.87851	0.328285	-8.76834	1.81322e-18	1.18419e-17	CG33116
FBgn0013954	16220.2	-1.66599	0.223671	-7.44842	9.44673e-14	6.19328e-13	FK506-bp2	X	FBgn0028407	604.782	-3.10724	0.501283	-6.19858	5.7e-10	3.59e-09	Drep3	X	FBgn0010422	1839.36	-2.01382	0.229765	-8.7647	1.87275e-18	1.22225e-17	TfIIS
FBgn0028342	9670.29	-1.83497	0.246523	-7.44339	9.81303e-14	6.42911e-13	ATPsyndelta	X	FBgn0027620	1107.28	-3.06847	0.495266	-6.19561	5.81e-10	3.66e-09	Acf	X	FBgn0039331	111.74	7.75684	0.885104	8.76376	1.88838e-18	1.23162e-17	ND-49L
FBgn0032213	2696.8	1.82026	0.244564	7.44286	9.85258e-14	6.4507e-13	CG5390	X	FBgn0000064	88946.2	3.02728	0.488724	6.19425	5.86e-10	3.69e-09	Ald	X	FBgn0053111	947.965	2.40791	0.274772	8.76332	1.89578e-18	1.23562e-17	CG33111
FBgn0032010	574.125	2.58971	0.348423	7.43267	1.06428e-13	6.9634e-13	CG8086	X	FBgn0263456	523.901	-3.03783	0.490518	-6.19311	5.9e-10	3.71e-09	nwk	X	FBgn0027339	10450.7	-2.4342	0.277774	-8.76325	1.89705e-18	1.23562e-17	jim
FBgn0053002	1608.97	-2.19538	0.295492	-7.42957	1.08951e-13	7.12371e-13	mRpL27	X	FBgn0261836	21270	2.66604	0.4309	6.18714	6.13e-10	3.86e-09	Msp300	X	FBgn0260499	672.038	-4.25661	0.485955	-8.75926	1.96543e-18	1.2793e-17	qvr
FBgn0033302	218.643	4.1818	0.562975	7.42805	1.10212e-13	7.20132e-13	Cyp6a14	X	FBgn0259896	169.591	4.59729	0.743124	6.18644	6.15e-10	3.87e-09	NimC1	X	FBgn0035727	122.304	4.65848	0.531867	8.75874	1.97452e-18	1.28436e-17	CG10063
FBgn0260004	106.765	5.34353	0.719785	7.42379	1.13815e-13	7.43178e-13	Snmp1	X	FBgn0035146	505.837	3.09671	0.500587	6.18615	6.17e-10	3.87e-09	CG13893	X	FBgn0031252	358.886	-3.35371	0.382928	-8.75806	1.98644e-18	1.29125e-17	CG13690
FBgn0051373	269.765	3.49637	0.470981	7.42358	1.14e-13	7.43874e-13	CG31373	X	FBgn0036568	144.189	4.90689	0.793757	6.18185	6.34e-10	3.98e-09	ATPsynbetaL	X	FBgn0038682	223.588	3.69503	0.422042	8.75513	2.03863e-18	1.3243e-17	CG5835
FBgn0085360	419.532	3.92638	0.528913	7.42349	1.14073e-13	7.43874e-13	CG34331	X	FBgn0031791	3334.17	2.95045	0.47736	6.18075	6.38e-10	4e-09	AANATL2	X	FBgn0015299	2458.17	-2.45161	0.280033	-8.75473	2.04594e-18	1.32816e-17	Ssb-c31a
FBgn0052091	194.169	5.545	0.747097	7.42207	1.15306e-13	7.51409e-13	CG32091	X	FBgn0037736	882.364	-4.36922	0.707046	-6.17954	6.43e-10	4.03e-09	CG12950	X	FBgn0035544	234.617	5.58842	0.638391	8.75392	2.06063e-18	1.3368e-17	CG15021
FBgn0010314	1745.69	-2.03278	0.273931	-7.42079	1.16425e-13	7.58197e-13	Cks30A	X	FBgn0037137	1347.4	-2.94758	0.477006	-6.17934	6.44e-10	4.03e-09	Nopp140	X	FBgn0039102	131.54	5.5569	0.635065	8.75013	2.13107e-18	1.38158e-17	SPE
FBgn0261608	19430.3	-2.81138	0.379026	-7.41739	1.19451e-13	7.77387e-13	RpL37A	X	FBgn0028622	2024.15	2.75173	0.44534	6.17894	6.45e-10	4.04e-09	qsm	X	FBgn0013981	30096.7	-2.27368	0.259882	-8.74887	2.15491e-18	1.3961e-17	His4r
FBgn0026148	739.913	-2.31924	0.312694	-7.41697	1.19829e-13	7.79327e-13	CG12253	X	FBgn0050418	278.885	-3.07	0.496876	-6.17861	6.47e-10	4.05e-09	nord	X	FBgn0015831	131.315	4.97421	0.568607	8.74806	2.17055e-18	1.40529e-17	Rtnl2
FBgn0029939	2154.23	-2.80063	0.377611	-7.41672	1.20059e-13	7.80302e-13	CG9650	X	FBgn0033174	337.671	3.27066	0.529389	6.17819	6.48e-10	4.06e-09	CG11125	X	FBgn0029676	972.08	-2.07467	0.237367	-8.74033	2.32421e-18	1.50378e-17	HIP-R
FBgn0038809	3496.64	1.72345	0.232598	7.40956	1.26716e-13	8.23021e-13	CG16953	X	FBgn0058006	184.031	3.61115	0.584776	6.17527	6.6e-10	4.13e-09	CG40006	X	FBgn0033020	114.993	5.15288	0.589642	8.73901	2.35166e-18	1.52053e-17	COX4L
FBgn0003187	161.187	3.49298	0.471464	7.40879	1.27454e-13	8.27268e-13	qua	X	FBgn0037521	1106.78	-2.82832	0.458177	-6.173	6.7e-10	4.19e-09	CG2993	X	FBgn0004910	1122.6	3.33058	0.381192	8.73727	2.38819e-18	1.54312e-17	Eip63F-1
FBgn0038660	1397.55	1.95907	0.26473	7.40026	1.35914e-13	8.81589e-13	CG14291	X	FBgn0051816	102.196	5.97404	0.968084	6.17099	6.79e-10	4.24e-09	CG31816	X	FBgn0015754	4250.84	-1.75832	0.201271	-8.73609	2.41316e-18	1.55823e-17	Lis-1
FBgn0035287	504.301	-2.53341	0.342664	-7.39328	1.43255e-13	9.28595e-13	CG13937	X	FBgn0000404	2250.45	-2.29014	0.371149	-6.17041	6.81e-10	4.25e-09	CycA	X	FBgn0035016	2930.82	-2.34135	0.268052	-8.73468	2.4434e-18	1.5767e-17	CG4612
FBgn0087002	14478.3	2.86771	0.388051	7.39005	1.46778e-13	9.50799e-13	apolpp	X	FBgn0000039	956.949	-4.60859	0.74736	-6.1665	6.98e-10	4.35e-09	nAChRalpha2	X	FBgn0024754	3259.62	-2.09603	0.240028	-8.73242	2.49282e-18	1.60753e-17	Flo1
FBgn0052447	620.839	2.62109	0.354854	7.38639	1.5087e-13	9.76508e-13	CG32447	X	FBgn0085256	11073.5	7.52003	1.21963	6.16581	7.01e-10	4.37e-09	CG34227	X	FBgn0037906	515.902	3.26528	0.374089	8.72862	2.57798e-18	1.66135e-17	PGRP-LB
FBgn0085428	289.52	4.95118	0.670318	7.38632	1.50947e-13	9.76508e-13	Nox	X	FBgn0250827	149.264	5.09337	0.826177	6.16499	7.05e-10	4.39e-09	whip	X	FBgn0036769	297.27	3.60581	0.413343	8.72353	2.69659e-18	1.73663e-17	Tsp74F
FBgn0039420	261.49	-4.05798	0.549613	-7.38334	1.54372e-13	9.9801e-13	CG6154	X	FBgn0011723	62.3355	5.87293	0.952985	6.16267	7.15e-10	4.45e-09	byn	X	FBgn0040252	184.901	5.3681	0.615607	8.72001	2.78181e-18	1.79033e-17	Ugt86Dh
FBgn0066084	42249.6	-3.50008	0.474141	-7.38194	1.56001e-13	1.00787e-12	RpL41	X	FBgn0053988	1320.95	-2.6086	0.423485	-6.15985	7.28e-10	4.53e-09	Mid1	X	FBgn0051882	95.9334	7.21251	0.827475	8.71628	2.87483e-18	1.84897e-17	CG31882
FBgn0050344	1756.77	2.0317	0.275293	7.38013	1.58132e-13	1.02096e-12	CG30344	X	FBgn0040299	190.646	4.45082	0.723264	6.15379	7.57e-10	4.7e-09	Myo28B1	X	FBgn0035643	352.701	-3.47812	0.399146	-8.71392	2.93544e-18	1.88671e-17	CG13287
FBgn0036082	258.026	4.78378	0.648255	7.37946	1.58929e-13	1.02543e-12	CG12362	X	FBgn0050022	1346.37	2.51784	0.409619	6.14679	7.91e-10	4.91e-09	CG30022	X	FBgn0035829	1816.67	-2.78347	0.319431	-8.71383	2.93782e-18	1.88699e-17	HP4
FBgn0036538	2744.25	-2.08264	0.282297	-7.37748	1.61313e-13	1.04013e-12	CG15715	X	FBgn0263355	414.956	-2.91234	0.473826	-6.14644	7.92e-10	4.92e-09	CG31688	X	FBgn0002306	546.538	3.05092	0.350305	8.70932	3.05707e-18	1.96229e-17	sas
FBgn0053179	318.608	-5.67644	0.769444	-7.37733	1.61501e-13	1.04065e-12	beat-IIIb	X	FBgn0026319	1075.67	-2.66466	0.43354	-6.14628	7.93e-10	4.92e-09	Traf4	X	FBgn0031260	6355.05	1.5198	0.174509	8.70897	3.06644e-18	1.96701e-17	Spp
FBgn0037464	90.7892	5.64657	0.765578	7.37556	1.63655e-13	1.05384e-12	CG1988	X	FBgn0052192	1091.89	4.25572	0.692506	6.14538	7.98e-10	4.94e-09	CG32192	X	FBgn0039124	204.366	6.11075	0.702022	8.7045	3.18977e-18	2.04478e-17	tbrd-1
FBgn0016926	2395.55	1.79957	0.244025	7.37451	1.64947e-13	1.06146e-12	Pino	X	FBgn0031683	1108.83	-2.64906	0.431095	-6.14496	8e-10	4.95e-09	CG4230	X	FBgn0015286	1440	-1.77502	0.204071	-8.69803	3.37708e-18	2.16342e-17	Rala
FBgn0262353	940.357	2.83857	0.385223	7.36863	1.72388e-13	1.10861e-12	CR43051	X	FBgn0004516	1521.45	-3.84794	0.626271	-6.1442	8.04e-10	4.97e-09	Gad1	X	FBgn0044050	1042.75	-3.23778	0.372389	-8.69461	3.48026e-18	2.22806e-17	Ilp3
FBgn0260799	5548.15	-2.11919	0.287709	-7.36575	1.76149e-13	1.13206e-12	p120ctn	X	FBgn0029851	118.018	5.26335	0.856903	6.1423	8.13e-10	5.03e-09	CG14445	X	FBgn0034184	1935.35	-2.01751	0.232047	-8.69441	3.48627e-18	2.23043e-17	CG9646
FBgn0036365	769.772	2.09011	0.283842	7.36366	1.78936e-13	1.14921e-12	cmb	X	FBgn0001197	17965.9	-2.33499	0.380157	-6.14218	8.14e-10	5.03e-09	His2Av	X	FBgn0037533	6941.36	-1.90295	0.218949	-8.69128	3.58378e-18	2.29131e-17	CD98hc
FBgn0032515	1506.17	-2.01065	0.273372	-7.355	1.90925e-13	1.22541e-12	loqs	X	FBgn0259707	1309.85	-3.98526	0.649397	-6.13686	8.42e-10	5.2e-09	CG42361	X	FBgn0031869	101.292	5.83018	0.671181	8.68645	3.73945e-18	2.38927e-17	CG18304
FBgn0010053	551.739	3.65869	0.497549	7.35342	1.93203e-13	1.23921e-12	Jheh1	X	FBgn0085428	208.933	3.70501	0.604303	6.13106	8.73e-10	5.39e-09	Nox	X	FBgn0265575	600.299	3.36063	0.386992	8.68398	3.82168e-18	2.44021e-17	yin
FBgn0259222	489.789	-3.10653	0.42251	-7.35256	1.94453e-13	1.24641e-12	CG42322	X	FBgn0035033	1165.3	-2.49639	0.407286	-6.12934	8.82e-10	5.44e-09	CG3548	X	FBgn0023001	529.711	2.74075	0.315721	8.68093	3.92553e-18	2.50487e-17	melt
FBgn0031208	127.78	5.60966	0.76325	7.34971	1.98635e-13	1.27238e-12	CG11023	X	FBgn0262160	4293.88	3.03529	0.495541	6.1252	9.06e-10	5.58e-09	CG9932	X	FBgn0051694	3671.14	1.81712	0.209367	8.6791	3.98921e-18	2.54384e-17	CG31694
FBgn0034743	14421.6	-3.00763	0.409438	-7.34574	2.0462e-13	1.30986e-12	RpS16	X	FBgn0261624	109.112	5.20764	0.850237	6.12493	9.07e-10	5.59e-09	I-3	X	FBgn0011715	1837.75	-2.36928	0.272989	-8.679	3.99252e-18	2.54429e-17	Snr1
FBgn0264005	293.951	-3.59649	0.489635	-7.34524	2.05385e-13	1.3139e-12	Hmx	X	FBgn0033437	1544.71	2.58506	0.422121	6.12398	9.13e-10	5.62e-09	CG12926	X	FBgn0051390	929.604	-1.94965	0.224792	-8.67313	4.20389e-18	2.67723e-17	MED7
FBgn0259745	2125.88	-2.56631	0.349565	-7.34146	2.11281e-13	1.35073e-12	wech	X	FBgn0036934	201.302	-4.18596	0.683681	-6.12268	9.2e-10	5.66e-09	sNPF-R	X	FBgn0053548	115.814	4.73964	0.546522	8.67237	4.23226e-18	2.69354e-17	SmydA-8
FBgn0036816	2745.77	2.61798	0.356649	7.3405	2.12798e-13	1.35954e-12	Indy	X	FBgn0033544	6866.42	2.31665	0.378435	6.12165	9.26e-10	5.69e-09	CG7220	X	FBgn0033498	91.6364	6.41242	0.739533	8.6709	4.28706e-18	2.72662e-17	CG12209
FBgn0034223	699.548	-2.15428	0.293687	-7.33529	2.21247e-13	1.4126e-12	Tes	X	FBgn0036821	2783.39	2.40043	0.392416	6.11706	9.53e-10	5.86e-09	CG3961	X	FBgn0003002	715.436	-2.22499	0.256748	-8.66606	4.47326e-18	2.84319e-17	opa
FBgn0042206	239.611	4.02783	0.549166	7.33446	2.22625e-13	1.42047e-12	GstD10	X	FBgn0038460	801.502	3.19802	0.523146	6.11305	9.77e-10	6e-09	CG18622	X	FBgn0032663	91.24	7.2032	0.832066	8.65701	4.84301e-18	3.0762e-17	CG15153
FBgn0035003	114.439	5.22085	0.712213	7.33046	2.29363e-13	1.46251e-12	CG15873	X	FBgn0263072	883.481	-4.15451	0.679722	-6.11207	9.83e-10	6.04e-09	CG43347	X	FBgn0034789	1127.97	-2.71792	0.314086	-8.65344	4.99711e-18	3.17201e-17	PIP5K59B
FBgn0030014	69.1542	5.91945	0.80759	7.32978	2.30537e-13	1.46904e-12	CG15337	X	FBgn0013720	5808.25	2.35961	0.386095	6.11149	9.87e-10	6.05e-09	pck	X	FBgn0000416	24769.4	2.58758	0.299034	8.65313	5.01061e-18	3.1785e-17	Sap-r
FBgn0013689	239.533	-5.90229	0.805475	-7.32772	2.3411e-13	1.49083e-12	trnA	X	FBgn0025684	3132.74	2.39885	0.3926	6.11016	9.95e-10	6.1e-09	MFS18	X	FBgn0011770	1539.36	2.15715	0.249447	8.64771	5.25436e-18	3.33096e-17	Gip
FBgn0034199	494.556	4.9593	0.676809	7.32747	2.3453e-13	1.49253e-12	Gbp1	X	FBgn0004395	2351.22	-2.35076	0.384759	-6.10967	9.98e-10	6.11e-09	unk	X	FBgn0051805	113.877	5.58961	0.646676	8.64361	5.44649e-18	3.45051e-17	CG31805
FBgn0031977	5056.05	-2.33871	0.319247	-7.3257	2.37659e-13	1.51146e-12	baf	X	FBgn0266937	1298.52	-3.00913	0.492706	-6.10734	1.01e-09	6.2e-09	CR45388	X	FBgn0051660	1253.47	-3.48936	0.403703	-8.64339	5.45697e-18	3.45489e-17	smog
FBgn0036266	180.606	-3.32464	0.454089	-7.32156	2.45099e-13	1.55777e-12	CG5626	X	FBgn0263219	1798.11	-3.03825	0.497535	-6.10661	1.02e-09	6.23e-09	Dscam4	X	FBgn0037935	519.16	3.70383	0.428602	8.64166	5.54034e-18	3.5054e-17	CG6834
FBgn0033081	1862.77	-1.78593	0.244076	-7.31712	2.53356e-13	1.6092e-12	geminin	X	FBgn0003308	261.552	3.50666	0.574431	6.10458	1.03e-09	6.3e-09	ry	X	FBgn0034420	1843.43	2.76387	0.319882	8.6403	5.60652e-18	3.54497e-17	CG10737
FBgn0050361	357.33	-4.20939	0.57597	-7.30834	2.70461e-13	1.71672e-12	mtt	X	FBgn0034996	107.156	5.27341	0.86403	6.10327	1.04e-09	6.35e-09	CG13575	X	FBgn0001981	789.699	-1.96762	0.227928	-8.63266	5.99429e-18	3.78769e-17	esg
FBgn0025111	349.91	2.87303	0.393321	7.30454	2.78221e-13	1.76484e-12	Ant2	X	FBgn0010473	2443.35	-2.60107	0.426269	-6.10194	1.05e-09	6.4e-09	tutl	X	FBgn0004419	3898.24	-1.63819	0.189834	-8.62961	6.15625e-18	3.88751e-17	me31B
FBgn0031716	392.074	-5.77353	0.790448	-7.30412	2.79094e-13	1.76923e-12	CG14015	X	FBgn0067317	132.39	4.37873	0.717696	6.1011	1.05e-09	6.43e-09	Cby	X	FBgn0040299	160.807	5.44701	0.631334	8.62778	6.25558e-18	3.94767e-17	Myo28B1
FBgn0024989	570.986	3.0539	0.418184	7.30276	2.81916e-13	1.7848e-12	CG3777	X	FBgn0013467	1534.66	-4.23463	0.694205	-6.09998	1.06e-09	6.47e-09	igl	X	FBgn0000527	2577.5	4.13379	0.479331	8.62407	6.46179e-18	4.07515e-17	e
FBgn0023479	757.864	3.68882	0.505348	7.29956	2.88709e-13	1.82544e-12	teq	X	FBgn0266441	971.571	-3.6074	0.591687	-6.09681	1.08e-09	6.59e-09	CG45071	X	FBgn0086347	896.083	2.28649	0.265141	8.62368	6.48357e-18	4.08624e-17	Myo31DF
FBgn0032431	103.067	5.9077	0.809316	7.29962	2.88573e-13	1.82544e-12	CG5435	X	FBgn0036579	1086.47	-2.85213	0.468059	-6.09354	1.1e-09	6.73e-09	CG5027	X	FBgn0024836	1023.56	-2.31041	0.267937	-8.62296	6.52474e-18	4.10953e-17	stan
FBgn0033283	101.859	5.25548	0.720084	7.29842	2.91165e-13	1.83978e-12	CG11635	X	FBgn0038009	16952.5	8.72476	1.43221	6.0918	1.12e-09	6.79e-09	CG17738	X	FBgn0036786	589.16	-3.45759	0.400982	-8.62282	6.53224e-18	4.11159e-17	skl
FBgn0031626	76.8942	4.88183	0.669031	7.29687	2.94546e-13	1.85994e-12	CG15631	X	FBgn0036428	1142.38	2.65048	0.435567	6.08513	1.16e-09	7.08e-09	Gbs-70E	X	FBgn0031920	130.729	6.99878	0.812035	8.61882	6.76468e-18	4.25397e-17	CG6441
FBgn0266227	117.956	-5.80962	0.79657	-7.2933	3.02457e-13	1.90866e-12	CR44922	X	FBgn0031335	141.552	6.88136	1.13112	6.08367	1.17e-09	7.14e-09	CG5565	X	FBgn0033439	397.921	6.37128	0.739232	8.61878	6.76718e-18	4.25397e-17	CG1773
FBgn0036522	1296.92	-2.26478	0.310742	-7.28829	3.13914e-13	1.97968e-12	CG7372	X	FBgn0025387	118.222	4.83345	0.79477	6.08157	1.19e-09	7.23e-09	CG12184	X	FBgn0011666	3093.98	-1.93426	0.224464	-8.61727	6.85701e-18	4.30765e-17	msi
FBgn0033659	360.999	4.56176	0.625917	7.28811	3.14329e-13	1.98102e-12	Damm	X	FBgn0259183	82.4348	4.6949	0.772056	6.08104	1.19e-09	7.25e-09	CG42287	X	FBgn0013685	995.738	-4.20192	0.487987	-8.61073	7.25969e-18	4.55768e-17	ND6
FBgn0259682	1032.63	2.33501	0.320557	7.28423	3.2351e-13	2.03757e-12	Jabba	X	FBgn0033828	114.777	4.97173	0.818524	6.07403	1.25e-09	7.57e-09	CG17048	X	FBgn0051155	851.14	-2.15276	0.250018	-8.61042	7.27927e-18	4.56703e-17	Rpb7
FBgn0029167	559.209	4.53024	0.622178	7.28126	3.30713e-13	2.0816e-12	Hml	X	FBgn0024963	1708.51	-2.50865	0.413714	-6.06372	1.33e-09	8.06e-09	GluClalpha	X	FBgn0264848	2377.61	-1.94621	0.226072	-8.60881	7.38259e-18	4.62886e-17	vih
FBgn0002622	17818.9	-2.44074	0.33528	-7.27972	3.3451e-13	2.10414e-12	RpS3	X	FBgn0034595	485.34	4.03925	0.666498	6.06041	1.36e-09	8.22e-09	CG15657	X	FBgn0031264	528.244	3.6881	0.428495	8.6071	7.49309e-18	4.69512e-17	CG11835
FBgn0003360	24944.3	-1.69692	0.233272	-7.27441	3.47934e-13	2.18718e-12	sesB	X	FBgn0038098	208.143	3.57392	0.590041	6.05706	1.39e-09	8.39e-09	CG7381	X	FBgn0015527	727.772	-2.0699	0.240511	-8.60627	7.54781e-18	4.72637e-17	peng
FBgn0031830	8701.01	-1.9586	0.269261	-7.27399	3.49014e-13	2.19114e-12	COX5B	X	FBgn0004003	957.239	3.17848	0.525691	6.04629	1.48e-09	8.97e-09	wbl	X	FBgn0266421	1370.95	-2.56802	0.298611	-8.59987	7.98041e-18	4.99405e-17	RPA3
FBgn0051546	82.4813	6.68653	0.919228	7.27408	3.488e-13	2.19114e-12	CG31546	X	FBgn0030065	366.762	2.76495	0.457398	6.04497	1.49e-09	9.03e-09	CG12075	X	FBgn0039920	1761.87	-1.89557	0.220425	-8.59958	8.00054e-18	5.00342e-17	CG11360
FBgn0263512	129.373	-4.32279	0.594439	-7.27206	3.54059e-13	2.22139e-12	Vsx2	X	FBgn0034025	3133.18	2.82942	0.468059	6.045	1.49e-09	9.03e-09	GalNAc-T1	X	FBgn0013733	5857.03	1.51156	0.175931	8.59178	8.56341e-18	5.35199e-17	shot
FBgn0030806	671.142	-2.25867	0.310601	-7.27195	3.54348e-13	2.22178e-12	CG13001	X	FBgn0015558	1472.2	-3.06929	0.508163	-6.03998	1.54e-09	9.31e-09	tty	X	FBgn0283521	11757.5	-1.64848	0.191882	-8.59107	8.61638e-18	5.38164e-17	lola
FBgn0259244	2851.38	-2.37468	0.326707	-7.26854	3.63391e-13	2.27702e-12	CG42342	X	FBgn0264502	1380.93	-3.90435	0.64672	-6.03716	1.57e-09	9.47e-09	CG43901	X	FBgn0034505	82.1192	7.04952	0.820775	8.58886	8.78387e-18	5.48273e-17	CG16739
FBgn0010194	743.338	-2.44827	0.336853	-7.26808	3.64646e-13	2.28342e-12	Wnt5	X	FBgn0261575	248.976	5.89061	0.975914	6.03599	1.58e-09	9.53e-09	tobi	X	FBgn0011596	192.308	4.69154	0.546574	8.58354	9.19948e-18	5.73847e-17	fzo
FBgn0003430	436.517	-3.70007	0.509522	-7.26186	3.81801e-13	2.38931e-12	slp1	X	FBgn0015031	28161.4	2.97147	0.493751	6.01814	1.76e-09	1.06e-08	cype	X	FBgn0260428	126.22	6.11883	0.713084	8.5808	9.42181e-18	5.87339e-17	CG42523
FBgn0261788	6200.59	-2.70841	0.372972	-7.2617	3.82251e-13	2.3906e-12	Ank2	X	FBgn0266730	56.3673	6.51163	1.08311	6.012	1.83e-09	1.1e-08	CR45203	X	FBgn0013269	4449.64	-2.1751	0.253594	-8.5771	9.7292e-18	6.06113e-17	FK506-bp1
FBgn0034286	585.13	-3.84943	0.530189	-7.26049	3.85684e-13	2.41053e-12	dpr13	X	FBgn0029891	2918.99	2.36216	0.393219	6.00725	1.89e-09	1.14e-08	Pink1	X	FBgn0010452	2447.05	-1.91128	0.22303	-8.56963	1.03816e-17	6.46342e-17	trn
FBgn0039350	2283.02	-2.10473	0.289892	-7.2604	3.85952e-13	2.41066e-12	jigr1	X	FBgn0038017	529.626	3.19041	0.531437	6.00337	1.93e-09	1.16e-08	CG4115	X	FBgn0031695	424.075	4.03345	0.470732	8.56846	1.04878e-17	6.52535e-17	Cyp4ac3
FBgn0000153	957.589	5.8434	0.805382	7.25544	4.00357e-13	2.49904e-12	b	X	FBgn0037140	463.788	2.5609	0.426815	6.00003	1.97e-09	1.19e-08	SLC22A	X	FBgn0029167	563.884	3.89026	0.454097	8.56702	1.06201e-17	6.60344e-17	Hml
FBgn0025726	4006.78	-1.92194	0.264996	-7.25271	4.08503e-13	2.54826e-12	unc-13	X	FBgn0038243	1359.32	2.6959	0.449472	5.99792	2e-09	1.2e-08	CG8066	X	FBgn0037502	147.381	7.03013	0.820733	8.56567	1.07446e-17	6.67662e-17	wa-cup
FBgn0032943	2016.7	-2.08709	0.287816	-7.25147	4.12273e-13	2.57014e-12	Tsp39D	X	FBgn0262816	152.34	5.352	0.892521	5.9965	2.02e-09	1.21e-08	CG43187	X	FBgn0032785	1271.54	4.49644	0.52518	8.5617	1.11211e-17	6.90615e-17	CG10026
FBgn0027950	1408.43	-2.00522	0.27655	-7.25082	4.14249e-13	2.58081e-12	MBD-like	X	FBgn0033051	461.284	2.6578	0.443262	5.996	2.02e-09	1.21e-08	Strica	X	FBgn0085479	73.253	6.88371	0.804449	8.55705	1.15795e-17	7.18621e-17	CG34450
FBgn0034583	4550.86	1.96637	0.271218	7.25013	4.16362e-13	2.59232e-12	CG10527	X	FBgn0034566	211.936	3.38971	0.56535	5.99577	2.03e-09	1.21e-08	CG9313	X	FBgn0034706	1785.86	2.68527	0.314155	8.54761	1.25659e-17	7.7934e-17	CG11275
FBgn0034420	1847.18	2.69867	0.372258	7.24947	4.18413e-13	2.60343e-12	CG10737	X	FBgn0032156	4333.86	2.47978	0.413602	5.99558	2.03e-09	1.22e-08	CG13124	X	FBgn0022987	1376.81	-2.33059	0.272759	-8.54451	1.29086e-17	8.00084e-17	qkr54B
FBgn0031423	78.0982	5.47546	0.756245	7.24033	4.4758e-13	2.78137e-12	CG3557	X	FBgn0014869	17959.2	2.43997	0.407363	5.98967	2.1e-09	1.26e-08	Pglym78	X	FBgn0052564	200.128	5.2401	0.613427	8.54233	1.31543e-17	8.14795e-17	CG32564
FBgn0086912	348.721	-2.35895	0.325804	-7.24039	4.47406e-13	2.78137e-12	mbm	X	FBgn0030964	334.368	3.76369	0.628798	5.98553	2.16e-09	1.29e-08	Pvf1	X	FBgn0010583	3296.91	-2.73194	0.319916	-8.53955	1.34746e-17	8.34102e-17	dock
FBgn0032530	70.3035	6.28308	0.86812	7.23756	4.56816e-13	2.83696e-12	CG9263	X	FBgn0039651	160.724	4.55146	0.760422	5.98544	2.16e-09	1.29e-08	Cyt-c1L	X	FBgn0053322	87.15	6.86125	0.803805	8.53597	1.38984e-17	8.59793e-17	CG33322
FBgn0004512	460.503	2.69599	0.372553	7.23652	4.60334e-13	2.85699e-12	Mdr49	X	FBgn0034420	1616.94	2.47347	0.413295	5.98474	2.17e-09	1.3e-08	CG10737	X	FBgn0262476	1571.07	-3.33853	0.391377	-8.53021	1.4608e-17	9.03114e-17	CG43066
FBgn0034523	685.078	-2.02217	0.279624	-7.23175	4.76795e-13	2.95728e-12	Nnf1a	X	FBgn0265597	815.119	-2.78778	0.465824	-5.98462	2.17e-09	1.3e-08	rad	X	FBgn0260632	721.478	3.25863	0.382031	8.52976	1.46657e-17	9.06107e-17	dl
FBgn0031264	323.759	3.32451	0.459741	7.23127	4.78513e-13	2.96605e-12	CG11835	X	FBgn0026721	1247.18	2.56548	0.428772	5.98331	2.19e-09	1.31e-08	fat-spondin	X	FBgn0037090	107.774	5.95538	0.698416	8.52698	1.50212e-17	9.27485e-17	Est-Q
FBgn0036727	146.163	4.05606	0.560931	7.23095	4.7964e-13	2.97115e-12	CG7589	X	FBgn0020445	1524.39	2.71651	0.454265	5.98001	2.23e-09	1.33e-08	E23	X	FBgn0283531	441.928	2.55563	0.299932	8.5207	1.58592e-17	9.78603e-17	Duox
FBgn0259481	1679.37	1.79917	0.248935	7.22746	4.92093e-13	3.04636e-12	Mob2	X	FBgn0051072	2655.66	2.43928	0.407945	5.97945	2.24e-09	1.33e-08	Lerp	X	FBgn0005631	1136.93	-2.13711	0.250953	-8.516	1.65163e-17	1.01851e-16	robo1
FBgn0027654	1630.7	-2.17748	0.301347	-7.22584	4.98004e-13	3.07934e-12	jdp	X	FBgn0033631	5215.13	2.64772	0.442937	5.97765	2.26e-09	1.35e-08	Sod3	X	FBgn0052072	107.632	5.28837	0.621158	8.51372	1.6844e-17	1.03806e-16	Elo68alpha
FBgn0038042	975.926	-2.83989	0.393019	-7.22583	4.9805e-13	3.07934e-12	Scgbeta	X	FBgn0022338	1415.18	-2.29935	0.385022	-5.97199	2.34e-09	1.4e-08	dnk	X	FBgn0013675	46041.3	-2.67906	0.314711	-8.51276	1.69835e-17	1.04599e-16	COX2
FBgn0038080	1430.85	-2.44904	0.339068	-7.22286	5.09058e-13	3.14541e-12	CG12279	X	FBgn0266452	1419.51	-2.34168	0.39241	-5.96743	2.41e-09	1.43e-08	CTPsyn	X	FBgn0028563	596.439	2.53255	0.297538	8.51171	1.71389e-17	1.05489e-16	sut1
FBgn0010602	7924.59	-1.62321	0.224759	-7.22201	5.1225e-13	3.16314e-12	lwr	X	FBgn0259821	594.789	-3.01636	0.505495	-5.96713	2.41e-09	1.44e-08	CG42402	X	FBgn0028379	163.085	6.60046	0.775952	8.50627	1.79624e-17	1.10488e-16	fan
FBgn0000244	864.395	2.55463	0.353834	7.21986	5.20409e-13	3.21149e-12	by	X	FBgn0263029	2778.5	-2.82086	0.472891	-5.96514	2.44e-09	1.45e-08	CG43324	X	FBgn0033104	746.688	-2.49388	0.293321	-8.50224	1.85974e-17	1.14322e-16	CG15237
FBgn0024188	2433.92	-1.85505	0.257079	-7.21589	5.35807e-13	3.30442e-12	san	X	FBgn0031682	1412.78	2.15033	0.360504	5.9648	2.45e-09	1.45e-08	CG5828	X	FBgn0034532	91.3866	4.35044	0.511758	8.50096	1.88026e-17	1.1551e-16	CG13436
FBgn0259739	509.546	4.15293	0.576384	7.20515	5.79785e-13	3.57339e-12	CG42393	X	FBgn0266100	1082.27	-4.64579	0.779046	-5.96343	2.47e-09	1.47e-08	CG44837	X	FBgn0263077	718.552	2.39411	0.281908	8.49253	2.02192e-17	1.24135e-16	CG43340
FBgn0264000	311.804	-3.59828	0.499508	-7.20364	5.86243e-13	3.61092e-12	GluRIB	X	FBgn0263665	101.469	5.43849	0.912003	5.96324	2.47e-09	1.47e-08	CR43656	X	FBgn0005411	2180.3	-1.88399	0.221856	-8.49195	2.03205e-17	1.24678e-16	U2af50
FBgn0035355	234.737	-3.33507	0.463608	-7.19373	6.30425e-13	3.88061e-12	CG16985	X	FBgn0015569	159.117	4.57451	0.767567	5.95976	2.53e-09	1.5e-08	alpha-Est10	X	FBgn0040996	124.135	6.56866	0.773754	8.48933	2.0783e-17	1.27435e-16	CG12617
FBgn0037933	1897.86	2.13506	0.296885	7.19152	6.4073e-13	3.94156e-12	Ho	X	FBgn0040684	86.9513	5.08032	0.852803	5.95721	2.57e-09	1.52e-08	CG12589	X	FBgn0033283	141.386	5.13117	0.604883	8.48291	2.19633e-17	1.34588e-16	CG11635
FBgn0032382	687.387	3.90291	0.542877	7.1893	6.5125e-13	4.00376e-12	Mal-B2	X	FBgn0030224	120.343	5.38114	0.903435	5.95631	2.58e-09	1.53e-08	CG12637	X	FBgn0036482	144.769	5.1997	0.613098	8.48101	2.23242e-17	1.36713e-16	CG13457
FBgn0053639	170.812	-4.19418	0.58348	-7.18822	6.56407e-13	4.03292e-12	CG33639	X	FBgn0023441	1243.27	2.48896	0.417966	5.95492	2.6e-09	1.54e-08	fus	X	FBgn0011692	720.003	-2.3364	0.275491	-8.48083	2.23594e-17	1.36843e-16	pav
FBgn0033814	1541.93	1.92661	0.268136	7.18522	6.70991e-13	4.11993e-12	CG4670	X	FBgn0003720	948.814	-3.73995	0.628475	-5.95084	2.67e-09	1.58e-08	tll	X	FBgn0039674	1111.6	2.07242	0.244395	8.4798	2.25583e-17	1.37973e-16	CG1907
FBgn0035813	1326.09	5.61651	0.781859	7.18353	6.79333e-13	4.16854e-12	CG8492	X	FBgn0053978	2123.46	2.9931	0.503035	5.95009	2.68e-09	1.58e-08	CG33978	X	FBgn0000715	696.363	-2.95206	0.348141	-8.47949	2.26188e-17	1.38256e-16	FMRFa
FBgn0261068	2857.5	-1.97788	0.275378	-7.18243	6.84853e-13	4.19977e-12	LSm7	X	FBgn0266456	141.686	4.43247	0.744969	5.94986	2.68e-09	1.58e-08	CG45081	X	FBgn0004435	1043.96	-2.10165	0.248005	-8.47424	2.3661e-17	1.44536e-16	Galphaq
FBgn0029882	2972.71	-1.70811	0.237876	-7.18071	6.93527e-13	4.2503e-12	CG3226	X	FBgn0002535	90565.1	7.64227	1.28503	5.94717	2.73e-09	1.61e-08	Lcp4	X	FBgn0046706	1164.22	-2.15502	0.25439	-8.47133	2.42608e-17	1.48106e-16	Haspin
FBgn0030616	29812.1	-2.25909	0.314646	-7.17978	6.98236e-13	4.2738e-12	RpL37a	X	FBgn0040001	751.804	2.77165	0.46623	5.94482	2.77e-09	1.63e-08	FASN3	X	FBgn0262563	174.345	4.94636	0.584032	8.46934	2.46788e-17	1.50564e-16	CG43103
FBgn0250827	84.5981	4.25458	0.592575	7.17981	6.98086e-13	4.2738e-12	whip	X	FBgn0030294	1488.49	-2.29332	0.385775	-5.94471	2.77e-09	1.63e-08	Pa1	X	FBgn0064912	165.684	7.19461	0.849738	8.46686	2.52101e-17	1.53709e-16	CG31178
FBgn0032337	351.027	-2.54636	0.354738	-7.17814	7.06669e-13	4.32271e-12	AstCC	X	FBgn0033250	1811.09	-3.44113	0.580173	-5.9312	3.01e-09	1.77e-08	CG14762	X	FBgn0039809	139.043	3.89035	0.45949	8.46667	2.52509e-17	1.53861e-16	CG15547
FBgn0020767	2420.65	-1.83579	0.255759	-7.1778	7.08424e-13	4.33073e-12	Spred	X	FBgn0264606	456.11	-3.33428	0.562295	-5.92977	3.03e-09	1.79e-08	Fife	X	FBgn0035144	190.229	4.83427	0.571011	8.46615	2.53641e-17	1.54454e-16	Kah
FBgn0261592	20453.7	-2.03047	0.283006	-7.17464	7.24995e-13	4.42927e-12	RpS6	X	FBgn0011274	408.311	2.50781	0.423083	5.92746	3.08e-09	1.81e-08	Dif	X	FBgn0051121	244.41	3.00019	0.354654	8.45949	2.68554e-17	1.63434e-16	CG31121
FBgn0037354	3271.93	2.42835	0.338747	7.16863	7.57505e-13	4.62499e-12	CG12171	X	FBgn0265598	877.683	-2.97583	0.502211	-5.92546	3.11e-09	1.83e-08	Bx	X	FBgn0039704	387.883	2.91455	0.344545	8.45913	2.69391e-17	1.6384e-16	neo
FBgn0038034	829.165	2.67496	0.373194	7.16774	7.62446e-13	4.65226e-12	Cyp9f3Psi	X	FBgn0052944	834.895	-2.78662	0.470359	-5.92446	3.13e-09	1.84e-08	CG32944	X	FBgn0039881	136.366	3.91691	0.463061	8.45875	2.70263e-17	1.64268e-16	CG1971
FBgn0030586	181.534	4.08615	0.57037	7.16402	7.83434e-13	4.77636e-12	CG12539	X	FBgn0031736	2325.61	-2.29625	0.387853	-5.92043	3.21e-09	1.88e-08	CG11030	X	FBgn0029659	167.077	6.72842	0.796263	8.44999	2.91324e-17	1.76959e-16	CG16782
FBgn0264789	171.9	4.76487	0.665116	7.16397	7.83763e-13	4.77636e-12	CR44019	X	FBgn0259098	149.969	5.29683	0.894905	5.91887	3.24e-09	1.9e-08	CG42246	X	FBgn0026721	852.445	2.33341	0.276236	8.44716	2.98475e-17	1.81189e-16	fat-spondin
FBgn0010391	3440.32	2.69055	0.375596	7.16341	7.86966e-13	4.7929e-12	Gtp-bp	X	FBgn0034476	1775.05	-2.57138	0.434486	-5.91821	3.25e-09	1.91e-08	Toll-7	X	FBgn0033802	585.315	-2.65804	0.315026	-8.43751	3.24156e-17	1.96656e-16	CG17724
FBgn0086710	13426.6	-2.93191	0.409711	-7.15603	8.30441e-13	5.05452e-12	RpL30	X	FBgn0032666	2352.9	-2.54551	0.430868	-5.90786	3.47e-09	2.03e-08	CG5758	X	FBgn0262029	947.388	2.23158	0.264507	8.43673	3.26331e-17	1.97852e-16	d
FBgn0052499	888.209	3.41769	0.477646	7.15528	8.35043e-13	5.07937e-12	Cda4	X	FBgn0038252	111.95	5.82844	0.986801	5.9064	3.5e-09	2.05e-08	BigH1	X	FBgn0262734	4831.01	-1.77346	0.210253	-8.43488	3.3155e-17	2.00891e-16	Rbp2
FBgn0032030	1044.2	-2.27272	0.317711	-7.15343	8.46349e-13	5.14494e-12	Wdr82	X	FBgn0038246	617.918	-4.7776	0.808923	-5.90612	3.5e-09	2.05e-08	CG14853	X	FBgn0028857	97.3221	5.67228	0.672624	8.43305	3.36767e-17	2.03925e-16	CG12448
FBgn0034368	5578.34	1.65075	0.230862	7.15039	8.65292e-13	5.25682e-12	CG5482	X	FBgn0051469	267.792	3.97016	0.672205	5.90618	3.5e-09	2.05e-08	CG31469	X	FBgn0052280	2599.35	2.04406	0.242397	8.43269	3.37821e-17	2.04436e-16	CG32280
FBgn0029870	1374.08	1.83451	0.256891	7.14118	9.25341e-13	5.61814e-12	Marf	X	FBgn0266084	491.901	2.64069	0.447244	5.90436	3.54e-09	2.07e-08	Fhos	X	FBgn0013681	1679.72	-3.40794	0.404535	-8.42434	3.62795e-17	2.19413e-16	ND3
FBgn0039816	719.23	-2.8335	0.396789	-7.14108	9.26031e-13	5.61884e-12	CG11317	X	FBgn0032167	204.608	4.05326	0.687104	5.89904	3.66e-09	2.14e-08	CG5853	X	FBgn0032886	762.589	-2.35118	0.279166	-8.42215	3.69625e-17	2.23405e-16	CG9328
FBgn0014179	370.687	-3.72693	0.521955	-7.14034	9.31031e-13	5.64568e-12	gcm	X	FBgn0029079	2628.94	-2.67555	0.453812	-5.89574	3.73e-09	2.18e-08	icln	X	FBgn0260964	1920.31	-2.94216	0.349438	-8.41968	3.77502e-17	2.28024e-16	Vmat
FBgn0023531	399.037	-3.23747	0.453446	-7.13971	9.35255e-13	5.66777e-12	CG32809	X	FBgn0028662	16959.2	1.99503	0.338664	5.8909	3.84e-09	2.24e-08	VhaPPA1-1	X	FBgn0023177	2561.19	-1.86604	0.221688	-8.41741	3.84899e-17	2.32348e-16	Pp4-19C
FBgn0051415	63.0031	5.53032	0.774731	7.13837	9.44415e-13	5.71974e-12	CG31415	X	FBgn0052091	187.318	3.77899	0.641811	5.88802	3.91e-09	2.28e-08	CG32091	X	FBgn0031367	127.31	4.85214	0.576914	8.4105	4.08265e-17	2.463e-16	c-cup
FBgn0031914	1487.3	3.49772	0.490388	7.13256	9.85169e-13	5.96286e-12	CG5973	X	FBgn0278608	6971.19	-2.35957	0.400833	-5.88668	3.94e-09	2.3e-08	Dsp1	X	FBgn0259241	455.913	-3.23827	0.385049	-8.41001	4.09989e-17	2.47187e-16	CG42339
FBgn0035696	304.327	2.96078	0.415198	7.131	9.96389e-13	6.02704e-12	Best2	X	FBgn0035151	357.592	3.05845	0.520134	5.88012	4.1e-09	2.39e-08	CG17129	X	FBgn0035452	499.966	2.35031	0.279786	8.40039	4.44988e-17	2.68122e-16	CG10359
FBgn0033983	620.569	-3.01896	0.423605	-7.12683	1.02704e-12	6.20858e-12	ADPS	X	FBgn0014033	358.024	3.73017	0.634708	5.87698	4.18e-09	2.43e-08	Sr-CI	X	FBgn0032358	1660.67	1.90712	0.227288	8.39078	4.8294e-17	2.9063e-16	Ppt2
FBgn0027578	1527.79	5.36106	0.752438	7.12492	1.04141e-12	6.29159e-12	CG14526	X	FBgn0035907	531.158	2.78104	0.473371	5.87497	4.23e-09	2.46e-08	GstO1	X	FBgn0036135	849.066	-2.28855	0.272763	-8.39025	4.85126e-17	2.91765e-16	mRpL2
FBgn0087021	999.385	-2.10502	0.295581	-7.12162	1.06662e-12	6.43993e-12	Spc25	X	FBgn0051721	818.152	-2.71009	0.461533	-5.87192	4.31e-09	2.5e-08	Trim9	X	FBgn0000274	90.3698	6.47215	0.772078	8.38276	5.17015e-17	3.10752e-16	Pka-C2
FBgn0020626	1095.05	1.88141	0.26421	7.12087	1.07247e-12	6.47124e-12	Osbp	X	FBgn0265002	187.713	-5.24274	0.892986	-5.87102	4.33e-09	2.52e-08	CG44153	X	FBgn0003346	1771.77	-2.80154	0.334427	-8.37713	5.42339e-17	3.25771e-16	RanGAP
FBgn0029885	1047.38	-1.89799	0.266623	-7.11862	1.09013e-12	6.57371e-12	CG3224	X	FBgn0004584	2912.8	-2.26289	0.385466	-5.87052	4.34e-09	2.52e-08	Rrp1	X	FBgn0032900	446.525	3.0218	0.360914	8.37265	5.63376e-17	3.38117e-16	CG14401
FBgn0052278	1034.96	-1.92882	0.271287	-7.10987	1.16149e-12	6.99974e-12	CG32278	X	FBgn0038638	1976.6	2.42944	0.413846	5.87039	4.35e-09	2.52e-08	CG7702	X	FBgn0037239	2623.87	2.30942	0.275831	8.3726	5.63585e-17	3.38117e-16	CG11739
FBgn0011828	929.533	2.90495	0.408698	7.10783	1.17886e-12	7.10002e-12	Pxn	X	FBgn0037849	792.603	-4.51495	0.769357	-5.86848	4.4e-09	2.55e-08	CG4596	X	FBgn0030040	741.657	4.95185	0.591531	8.37124	5.70157e-17	3.41848e-16	CG15347
FBgn0029864	240.361	-3.21243	0.452107	-7.10546	1.19918e-12	7.218e-12	CG15894	X	FBgn0035734	59.5366	5.77895	0.98555	5.86368	4.53e-09	2.62e-08	CG14823	X	FBgn0045064	1788.71	3.3283	0.397667	8.36957	5.78307e-17	3.46521e-16	bwa
FBgn0051694	3499.62	2.19392	0.308886	7.10269	1.2235e-12	7.35981e-12	CG31694	X	FBgn0052590	575.286	-2.7672	0.471931	-5.86357	4.53e-09	2.62e-08	CG32590	X	FBgn0022960	1917.24	-2.4243	0.28983	-8.36454	6.03507e-17	3.61399e-16	vimar
FBgn0035393	537.898	-2.18673	0.307894	-7.1022	1.22786e-12	7.38152e-12	CG16753	X	FBgn0036031	117.618	4.43978	0.757691	5.85961	4.64e-09	2.68e-08	CG6761	X	FBgn0261789	3013.86	-2.01606	0.241187	-8.35893	6.32913e-17	3.78774e-16	SmD2
FBgn0263994	871.464	-3.03903	0.427988	-7.10074	1.24092e-12	7.45542e-12	CG43737	X	FBgn0038666	664.014	-2.57836	0.440096	-5.85862	4.67e-09	2.7e-08	Smu1	X	FBgn0036046	662.938	-4.06445	0.486313	-8.35768	6.39652e-17	3.82573e-16	Ilp2
FBgn0025456	11596.2	4.86344	0.68506	7.0993	1.25394e-12	7.52903e-12	CREG	X	FBgn0035903	646.586	-4.76216	0.812966	-5.85776	4.69e-09	2.71e-08	CG6765	X	FBgn0267791	4355.9	-1.5986	0.191276	-8.35754	6.40407e-17	3.82789e-16	HnRNP-K
FBgn0085190	77.0823	6.31699	0.889887	7.09864	1.25987e-12	7.55998e-12	CG34161	X	FBgn0021874	374.181	-2.79854	0.477791	-5.85724	4.71e-09	2.72e-08	Nle	X	FBgn0031725	180.649	-4.79821	0.574436	-8.35291	6.66021e-17	3.97855e-16	DIP-eta
FBgn0266084	475.748	3.27533	0.461433	7.09816	1.26428e-12	7.58181e-12	Fhos	X	FBgn0037973	835.002	2.43152	0.415133	5.85721	4.71e-09	2.72e-08	CG18547	X	FBgn0004167	774.516	2.31624	0.277352	8.35125	6.75461e-17	4.03246e-16	kst
FBgn0036437	273.964	6.24283	0.879788	7.09583	1.28573e-12	7.70574e-12	CG5048	X	FBgn0033683	1540.88	3.17063	0.541396	5.85639	4.73e-09	2.73e-08	CG18343	X	FBgn0037235	4340.91	1.88718	0.226004	8.35019	6.81504e-17	4.06604e-16	CG1103
FBgn0010241	284.195	5.06415	0.714304	7.08963	1.34469e-12	8.05411e-12	Mdr50	X	FBgn0032464	124.644	4.64737	0.793904	5.85382	4.8e-09	2.77e-08	Vha68-3	X	FBgn0028382	475.812	-2.31926	0.277846	-8.3473	6.98395e-17	4.16427e-16	cyp33
FBgn0264711	289.769	4.44513	0.627014	7.08937	1.34727e-12	8.06467e-12	CG43980	X	FBgn0267728	471.925	-3.2598	0.557204	-5.85028	4.91e-09	2.83e-08	otk2	X	FBgn0031627	625.5	-3.5795	0.428962	-8.34456	7.14772e-17	4.25931e-16	CG15630
FBgn0033791	544.413	-3.12586	0.441406	-7.08159	1.42507e-12	8.52511e-12	Drl-2	X	FBgn0262475	676.735	2.44873	0.418588	5.84998	4.92e-09	2.83e-08	bru2	X	FBgn0035008	75.1741	5.08897	0.609972	8.34296	7.24547e-17	4.31491e-16	CG3494
FBgn0010114	749.154	-3.63345	0.513243	-7.07938	1.44797e-12	8.65683e-12	hig	X	FBgn0035724	229.882	3.33367	0.569933	5.84923	4.94e-09	2.84e-08	CG10064	X	FBgn0034259	2346.97	-2.35429	0.282437	-8.33564	7.70806e-17	4.58759e-16	P32
FBgn0000052	956.128	2.15087	0.303967	7.07599	1.48382e-12	8.86574e-12	ade2	X	FBgn0264979	321.946	4.07152	0.696233	5.84792	4.98e-09	2.86e-08	CG4267	X	FBgn0263111	866.596	-2.20904	0.265255	-8.32798	8.22331e-17	4.89126e-16	cac
FBgn0051007	68.734	7.03649	0.994702	7.07397	1.50566e-12	8.99072e-12	CG31007	X	FBgn0035252	4110.64	2.10864	0.360665	5.84653	5.02e-09	2.88e-08	CG7970	X	FBgn0013334	4814.77	-2.63572	0.316582	-8.32553	8.39501e-17	4.99034e-16	Sap47
FBgn0263236	2212.12	3.13574	0.44339	7.07221	1.52487e-12	9.09987e-12	SP1029	X	FBgn0039647	898.943	-2.85257	0.48791	-5.8465	5.02e-09	2.88e-08	CG14509	X	FBgn0038257	355.599	4.46405	0.536335	8.32325	8.55833e-17	5.08431e-16	smp-30
FBgn0010258	140.594	3.56816	0.505225	7.06252	1.63513e-12	9.75193e-12	Rbp4	X	FBgn0013759	1847.92	-2.56705	0.439207	-5.84473	5.07e-09	2.91e-08	CASK	X	FBgn0031468	86.8814	5.50565	0.661671	8.32084	8.73446e-17	5.18578e-16	CG2975
FBgn0051528	91.3178	4.78747	0.677941	7.06177	1.64397e-12	9.79865e-12	CG31528	X	FBgn0052847	113.545	4.5611	0.780381	5.84471	5.07e-09	2.91e-08	CG32847	X	FBgn0085431	150.829	-5.01294	0.602541	-8.31966	8.82132e-17	5.23416e-16	CG34402
FBgn0260461	214.741	3.96894	0.562145	7.06036	1.66073e-12	9.89252e-12	Rcd7	X	FBgn0036975	1376.21	2.91098	0.498639	5.83785	5.29e-09	3.03e-08	CG5618	X	FBgn0010314	1290.68	-2.61321	0.314162	-8.31804	8.94264e-17	5.30292e-16	Cks30A
FBgn0036285	129.755	5.01479	0.710601	7.05711	1.70003e-12	1.01204e-11	toe	X	FBgn0030940	304.601	4.56918	0.783273	5.83345	5.43e-09	3.11e-08	CG15040	X	FBgn0085282	298.287	5.65831	0.680268	8.31776	8.96424e-17	5.31249e-16	CG34253
FBgn0266100	882.886	-3.86745	0.548366	-7.05268	1.75501e-12	1.04414e-11	CG44837	X	FBgn0036913	582.05	-2.61242	0.447871	-5.83298	5.44e-09	3.12e-08	Usp32	X	FBgn0000152	531.515	2.52522	0.303601	8.31757	8.97873e-17	5.31783e-16	Axs
FBgn0037525	2435.84	-2.91996	0.414196	-7.0497	1.79302e-12	1.06611e-11	CG17816	X	FBgn0243514	385.406	3.61861	0.620587	5.83094	5.51e-09	3.15e-08	eater	X	FBgn0019925	6106.41	1.5755	0.189452	8.3161	9.09072e-17	5.38089e-16	Surf4
FBgn0039396	108.898	-5.46295	0.775388	-7.04544	1.84873e-12	1.09856e-11	CCAP-R	X	FBgn0031695	282.853	3.56815	0.612109	5.82927	5.57e-09	3.18e-08	Cyp4ac3	X	FBgn0034399	2312.13	2.69335	0.323885	8.31577	9.11591e-17	5.39252e-16	CG15083
FBgn0030718	4031.68	-1.59666	0.226633	-7.04512	1.85303e-12	1.10045e-11	ND-20	X	FBgn0038878	253.368	4.11621	0.706368	5.82729	5.63e-09	3.22e-08	CG3301	X	FBgn0036494	515.02	-2.55184	0.306902	-8.31484	9.18766e-17	5.43166e-16	Toll-6
FBgn0039274	586.958	-2.64502	0.375518	-7.04367	1.87247e-12	1.11132e-11	CG11920	X	FBgn0031850	728.616	4.17838	0.717749	5.8215	5.83e-09	3.33e-08	Tsp	X	FBgn0261791	2731.44	-2.4905	0.29959	-8.31301	9.33017e-17	5.51256e-16	SNRPG
FBgn0015400	793.837	-3.01782	0.428558	-7.04182	1.89749e-12	1.12548e-11	kek2	X	FBgn0001168	2098.47	2.96252	0.508937	5.821	5.85e-09	3.34e-08	h	X	FBgn0037534	863.398	2.91231	0.350367	8.31215	9.39848e-17	5.54955e-16	CG2781
FBgn0024733	36042	-2.24592	0.318985	-7.04083	1.911e-12	1.13281e-11	RpL10	X	FBgn0029975	2140.31	-2.26208	0.389437	-5.80858	6.3e-09	3.59e-08	spidey	X	FBgn0042119	92.135	5.93129	0.714654	8.29952	1.04529e-16	6.16844e-16	Cpr65Au
FBgn0004907	30333.2	-1.5601	0.221708	-7.03672	1.96815e-12	1.16598e-11	14-3-3zeta	X	FBgn0052350	741.306	-2.3815	0.410138	-5.80658	6.38e-09	3.63e-08	Vps11	X	FBgn0035620	95.9607	6.84715	0.825167	8.2979	1.05967e-16	6.24947e-16	CG5150
FBgn0027339	16338.7	-2.72227	0.387032	-7.03371	2.01111e-12	1.19071e-11	jim	X	FBgn0028554	2776.06	-2.46747	0.425286	-5.80192	6.56e-09	3.73e-08	x16	X	FBgn0029747	68.2728	5.49507	0.662514	8.29428	1.09243e-16	6.43879e-16	CG5062
FBgn0003941	44496.7	-2.24373	0.319125	-7.03086	2.0527e-12	1.2146e-11	RpL40	X	FBgn0033893	125.963	4.46274	0.769617	5.79864	6.69e-09	3.81e-08	CG18371	X	FBgn0010109	351.361	-2.88725	0.348232	-8.29118	1.12133e-16	6.60511e-16	dpn
FBgn0270928	754.46	-3.7482	0.533113	-7.03077	2.05403e-12	1.21465e-11	VAChT	X	FBgn0029823	5800.43	2.65059	0.457326	5.79583	6.8e-09	3.87e-08	CG3011	X	FBgn0031762	1246.36	-3.054	0.368514	-8.28734	1.15809e-16	6.81754e-16	CG9098
FBgn0034724	1054.9	-2.0071	0.285611	-7.02738	2.10441e-12	1.24369e-11	babos	X	FBgn0004892	177.032	3.26626	0.563751	5.79379	6.88e-09	3.91e-08	sob	X	FBgn0001234	24089	1.7649	0.21299	8.28631	1.16816e-16	6.86851e-16	Hsromega
FBgn0030310	985.386	4.84916	0.690309	7.02463	2.14639e-12	1.26773e-11	PGRP-SA	X	FBgn0262782	12984.4	2.31919	0.400311	5.79347	6.89e-09	3.92e-08	Mdh1	X	FBgn0038638	2048.55	2.77189	0.334512	8.28637	1.16753e-16	6.86851e-16	CG7702
FBgn0013672	139599	-3.10926	0.44302	-7.01833	2.24541e-12	1.32541e-11	ATP6	X	FBgn0038054	57.8573	5.73759	0.990503	5.7926	6.93e-09	3.93e-08	CG5509	X	FBgn0005558	406.763	-3.36215	0.405811	-8.28502	1.18085e-16	6.93893e-16	ey
FBgn0040299	98.7504	4.98128	0.709921	7.01668	2.2721e-12	1.34036e-11	Myo28B1	X	FBgn0038092	305.265	-3.72505	0.643516	-5.78859	7.1e-09	4.03e-08	beat-Vb	X	FBgn0035955	80.9178	4.9488	0.597394	8.28399	1.19121e-16	6.99555e-16	CG5194
FBgn0058178	3680.29	-1.87755	0.267591	-7.01647	2.27548e-12	1.34154e-11	CG40178	X	FBgn0036236	96.5401	5.02868	0.868964	5.78699	7.17e-09	4.06e-08	CG6931	X	FBgn0031476	106.324	6.05068	0.730738	8.28023	1.22943e-16	7.21566e-16	CG8813
FBgn0000036	1341.29	-3.11691	0.444815	-7.0072	2.4313e-12	1.43169e-11	nAChRalpha1	X	FBgn0027491	1894.75	-2.84369	0.49142	-5.78667	7.18e-09	4.07e-08	Cdk5alpha	X	FBgn0040324	1708.55	-2.28631	0.276281	-8.27529	1.28138e-16	7.51605e-16	Ephrin
FBgn0266452	1183.76	-2.13374	0.304504	-7.00726	2.43028e-12	1.43169e-11	CTPsyn	X	FBgn0263504	197.109	3.40757	0.589345	5.78196	7.38e-09	4.18e-08	CR43493	X	FBgn0000303	492.427	-3.20406	0.387297	-8.27288	1.30766e-16	7.66558e-16	ChAT
FBgn0024352	4434.2	-1.73219	0.247328	-7.00359	2.49489e-12	1.46814e-11	Hop	X	FBgn0037354	3115.68	2.16694	0.375202	5.77538	7.68e-09	4.35e-08	CG12171	X	FBgn0032006	560.448	2.8288	0.341955	8.27243	1.31253e-16	7.68947e-16	Pvr
FBgn0034566	188.495	3.0749	0.439051	7.00351	2.49621e-12	1.46814e-11	CG9313	X	FBgn0003044	914.413	-2.46037	0.426254	-5.77206	7.83e-09	4.43e-08	Pcl	X	FBgn0043001	1131.87	-2.14757	0.259719	-8.26881	1.35299e-16	7.92173e-16	Chrac-16
FBgn0000241	263.907	3.70104	0.528608	7.00148	2.53268e-12	1.48763e-11	bw	X	FBgn0039299	10949.7	8.18277	1.41964	5.76399	8.21e-09	4.64e-08	CG11854	X	FBgn0052590	405.125	-2.45307	0.296949	-8.26093	1.44544e-16	8.45794e-16	CG32590
FBgn0038431	177.091	5.42594	0.774961	7.00156	2.53123e-12	1.48763e-11	CG10405	X	FBgn0013308	95.301	4.44206	0.770714	5.76357	8.24e-09	4.65e-08	Odc2	X	FBgn0034398	14538.1	1.92037	0.232492	8.25992	1.45775e-16	8.52484e-16	CG15098
FBgn0083968	2594.99	-2.53419	0.361954	-7.00141	2.53391e-12	1.48763e-11	CG34132	X	FBgn0030398	347.846	4.1933	0.72824	5.75813	8.5e-09	4.8e-08	Cpr11B	X	FBgn0032633	976.313	-2.68582	0.325239	-8.25801	1.48121e-16	8.65687e-16	Lrch
FBgn0039465	3910.46	-2.01131	0.287328	-7.00005	2.55878e-12	1.50133e-11	Tsp97E	X	FBgn0267978	1648.2	-2.32397	0.403676	-5.757	8.56e-09	4.83e-08	ap	X	FBgn0034595	197.705	3.48642	0.422191	8.25791	1.48242e-16	8.6587e-16	CG15657
FBgn0030501	376.335	-3.30926	0.472878	-6.99813	2.59397e-12	1.52106e-11	BthD	X	FBgn0031220	1739.77	2.09759	0.364441	5.75564	8.63e-09	4.87e-08	CG4822	X	FBgn0051690	323.681	-3.90516	0.472967	-8.25673	1.49722e-16	8.73991e-16	CG31690
FBgn0032464	95.0028	3.71526	0.530999	6.99674	2.6198e-12	1.53528e-11	Vha68-3	X	FBgn0261270	6034.93	-2.11087	0.36696	-5.75232	8.8e-09	4.96e-08	SelD	X	FBgn0011270	124.982	5.59079	0.677134	8.25656	1.49934e-16	8.74707e-16	Pglym87
FBgn0005658	722.348	-3.48273	0.498131	-6.99158	2.71804e-12	1.5919e-11	Ets65A	X	FBgn0261509	1030.3	2.56682	0.446561	5.74797	9.03e-09	5.09e-08	haf	X	FBgn0039734	957.19	-3.29514	0.399213	-8.25408	1.53078e-16	8.9251e-16	Tace
FBgn0053284	79.0781	7.22736	1.03398	6.98986	2.75154e-12	1.61056e-11	CG33284	X	FBgn0023023	1535.37	-2.5602	0.4455	-5.74681	9.09e-09	5.12e-08	CRMP	X	FBgn0051451	1318.54	-3.15188	0.381968	-8.25169	1.56175e-16	9.10021e-16	CR31451
FBgn0259935	281.27	-3.51312	0.502781	-6.98738	2.80062e-12	1.6383e-11	CG42458	X	FBgn0037487	336.742	3.01985	0.525637	5.74512	9.19e-09	5.17e-08	thw	X	FBgn0038165	1167.6	-4.37455	0.530455	-8.2468	1.62693e-16	9.47436e-16	Task6
FBgn0032346	658.896	-2.41239	0.345334	-6.98566	2.83525e-12	1.65757e-11	Csl4	X	FBgn0030334	203.935	3.14129	0.54697	5.74307	9.3e-09	5.23e-08	Karl	X	FBgn0038975	834.444	-2.29811	0.278917	-8.2394	1.73073e-16	1.00728e-15	Nrx-1
FBgn0013278	395.499	4.32447	0.619063	6.98551	2.83831e-12	1.65837e-11	Hsp70Bb	X	FBgn0259935	379.85	-2.89507	0.504103	-5.74301	9.3e-09	5.23e-08	CG42458	X	FBgn0029974	331.893	-3.18249	0.386269	-8.23905	1.73582e-16	1.00964e-15	dpr14
FBgn0031116	451.67	-3.8077	0.545345	-6.98219	2.90617e-12	1.697e-11	CG1695	X	FBgn0264078	2929.45	-2.29433	0.399558	-5.74216	9.35e-09	5.25e-08	Flo2	X	FBgn0261803	195.19	4.24123	0.514913	8.2368	1.76882e-16	1.02822e-15	CG42749
FBgn0025625	744.074	-2.84255	0.407188	-6.98093	2.93227e-12	1.71122e-11	Sik2	X	FBgn0004910	1377.3	2.74699	0.478441	5.74153	9.38e-09	5.27e-08	Eip63F-1	X	FBgn0010053	587.857	2.41581	0.293369	8.23472	1.79976e-16	1.04558e-15	Jheh1
FBgn0035271	1941.52	-2.87663	0.412093	-6.98055	2.94027e-12	1.71463e-11	CG2021	X	FBgn0036769	307.441	3.38869	0.590235	5.74126	9.4e-09	5.27e-08	Tsp74F	X	FBgn0010382	1797.91	-2.58503	0.313957	-8.2337	1.81516e-16	1.05389e-15	CycE
FBgn0051161	133.055	5.21741	0.747427	6.98049	2.94162e-12	1.71463e-11	CG31161	X	FBgn0051528	212.086	3.98871	0.694735	5.74134	9.39e-09	5.27e-08	CG31528	X	FBgn0051453	1700.2	-1.74565	0.212017	-8.23357	1.8172e-16	1.05445e-15	pch2
FBgn0040066	1136.72	-2.25364	0.323022	-6.97673	3.02133e-12	1.75923e-11	wds	X	FBgn0262982	91.2981	5.61385	0.978401	5.73778	9.59e-09	5.38e-08	CG43290	X	FBgn0051145	851.008	2.2721	0.276142	8.22803	1.9032e-16	1.1037e-15	CG31145
FBgn0085380	433.549	-2.61519	0.374846	-6.97671	3.02174e-12	1.75923e-11	CG34351	X	FBgn0043364	2002.84	2.62097	0.457608	5.72755	1.02e-08	5.71e-08	cbt	X	FBgn0261278	2682.68	-1.55059	0.188493	-8.22625	1.93163e-16	1.11952e-15	grp
FBgn0039070	111.467	5.37849	0.771361	6.97273	3.10855e-12	1.8087e-11	CG17083	X	FBgn0045064	1617.64	2.50544	0.437745	5.7235	1.04e-08	5.84e-08	bwa	X	FBgn0015576	226.895	3.49624	0.425385	8.21899	2.05217e-16	1.18867e-15	alpha-Est8
FBgn0029975	2035.65	-2.21517	0.317806	-6.97019	3.16519e-12	1.84055e-11	spidey	X	FBgn0001253	3130.52	-2.29688	0.401449	-5.72147	1.06e-08	5.91e-08	ImpE1	X	FBgn0015031	20009.8	2.57689	0.3136	8.21712	2.08451e-16	1.20669e-15	cype
FBgn0260744	2146.89	1.80887	0.25962	6.96738	3.22905e-12	1.87657e-11	Tango9	X	FBgn0035025	208.13	-3.18682	0.557031	-5.72108	1.06e-08	5.92e-08	uri	X	FBgn0042104	468.302	6.01203	0.732437	8.20826	2.24414e-16	1.29832e-15	CG18747
FBgn0262717	671.786	2.66762	0.383053	6.96411	3.30479e-12	1.91945e-11	Skeletor	X	FBgn0013334	5451.16	-2.32269	0.406198	-5.71814	1.08e-08	6.02e-08	Sap47	X	FBgn0039019	827.543	-2.80021	0.341183	-8.20735	2.26127e-16	1.30745e-15	HP1c
FBgn0038666	779.13	-2.14513	0.308448	-6.95459	3.53585e-12	2.05243e-11	Smu1	X	FBgn0040384	3521.35	2.06794	0.361652	5.71804	1.08e-08	6.02e-08	CG32795	X	FBgn0028969	6807.38	1.93597	0.236187	8.19676	2.46963e-16	1.42708e-15	deltaCOP
FBgn0032244	1255.73	-2.04313	0.293904	-6.95169	3.6093e-12	2.09382e-11	RfC3	X	FBgn0038071	2503.19	-2.78482	0.487248	-5.7154	1.09e-08	6.11e-08	Dtg	X	FBgn0038934	284.656	2.77788	0.33896	8.19528	2.50006e-16	1.4438e-15	Gld2
FBgn0003448	998.878	-4.35755	0.627209	-6.94753	3.71741e-12	2.15526e-11	sna	X	FBgn0261811	2345.9	-2.19115	0.383412	-5.71486	1.1e-08	6.12e-08	pico	X	FBgn0267001	3810.22	-1.76681	0.215743	-8.18942	2.62488e-16	1.51499e-15	Ten-a
FBgn0002633	753.933	-2.27211	0.327153	-6.94509	3.78219e-12	2.19152e-11	E(spl)m7-HLH	X	FBgn0259697	791.933	-3.39804	0.594905	-5.71191	1.12e-08	6.23e-08	nvd	X	FBgn0052549	2048	1.84842	0.225729	8.1887	2.64058e-16	1.52315e-15	CG32549
FBgn0030271	341.754	-2.77719	0.399951	-6.94384	3.81587e-12	2.20972e-11	CG15202	X	FBgn0030421	729.449	-4.14937	0.72653	-5.71122	1.12e-08	6.25e-08	CG3812	X	FBgn0024963	1092.07	-3.6697	0.448536	-8.18149	2.80361e-16	1.61623e-15	GluClalpha
FBgn0033431	760.988	2.39635	0.345175	6.94241	3.85455e-12	2.2308e-11	CG1827	X	FBgn0024189	567.831	-3.65341	0.639704	-5.7111	1.12e-08	6.25e-08	sns	X	FBgn0039667	134.964	4.46973	0.546468	8.17932	2.85455e-16	1.64462e-15	CG2010
FBgn0034232	1176.64	-1.86151	0.268471	-6.93373	4.09884e-12	2.36937e-11	CG4866	X	FBgn0032006	633.544	2.69691	0.472363	5.70941	1.13e-08	6.31e-08	Pvr	X	FBgn0037850	271.39	3.7026	0.452744	8.17812	2.88299e-16	1.66002e-15	CG14695
FBgn0031260	6427.95	1.94793	0.281026	6.93152	4.16337e-12	2.40525e-11	Spp	X	FBgn0025111	324.946	2.91403	0.51063	5.70672	1.15e-08	6.4e-08	Ant2	X	FBgn0031240	139.732	4.2506	0.52022	8.17078	3.06395e-16	1.76318e-15	CG3345
FBgn0261020	2434.56	1.85958	0.268386	6.92876	4.24536e-12	2.45118e-11	wol	X	FBgn0028563	879.958	2.63307	0.461578	5.7045	1.17e-08	6.48e-08	sut1	X	FBgn0032685	933.425	4.99711	0.611834	8.16742	3.15043e-16	1.81187e-15	CG10211
FBgn0031478	1602.58	2.89049	0.417246	6.92755	4.28193e-12	2.47083e-11	CG8814	X	FBgn0039674	1330.05	2.38693	0.418579	5.70247	1.18e-08	6.56e-08	CG1907	X	FBgn0051184	1285.86	-2.46869	0.302391	-8.16387	3.24445e-16	1.86484e-15	LSm3
FBgn0038398	67.5825	5.42336	0.78326	6.92408	4.38809e-12	2.5306e-11	sxe2	X	FBgn0029765	149.787	4.18694	0.734366	5.70144	1.19e-08	6.59e-08	CG16756	X	FBgn0019650	1076.91	-3.94049	0.482822	-8.16138	3.31221e-16	1.90266e-15	toy
FBgn0011787	1184.63	-1.77692	0.256841	-6.91835	4.5694e-12	2.6336e-11	mRpL12	X	FBgn0024754	3926.94	-2.09966	0.368313	-5.70075	1.19e-08	6.62e-08	Flo1	X	FBgn0038360	693.398	1.94693	0.238607	8.15955	3.36265e-16	1.9305e-15	CG9590
FBgn0015239	1665.43	2.05845	0.297616	6.91646	4.63067e-12	2.66734e-11	Hr78	X	FBgn0003607	8445.86	-2.16101	0.379099	-5.70039	1.2e-08	6.63e-08	Su(var)205	X	FBgn0032773	10457	7.28516	0.892878	8.15918	3.37304e-16	1.93532e-15	fon
FBgn0036101	1308.77	1.72666	0.249677	6.91559	4.65931e-12	2.68226e-11	NijA	X	FBgn0030806	731.703	-2.64619	0.464539	-5.69638	1.22e-08	6.78e-08	CG13001	X	FBgn0000108	3506.23	-3.25708	0.399333	-8.15631	3.45426e-16	1.98075e-15	Appl
FBgn0284246	733.099	-2.29047	0.331248	-6.91469	4.68884e-12	2.69767e-11	l(2)k09848	X	FBgn0284220	3192.1	-2.89705	0.508961	-5.69209	1.25e-08	6.95e-08	Top2	X	FBgn0034720	953.553	-3.32428	0.40769	-8.15394	3.52252e-16	2.01871e-15	Liprin-gamma
FBgn0013342	4248.43	-2.94285	0.425757	-6.91206	4.77678e-12	2.74665e-11	nSyb	X	FBgn0000721	1551.53	2.53275	0.445002	5.69155	1.26e-08	6.97e-08	for	X	FBgn0010607	687.941	-2.09437	0.25694	-8.1512	3.60345e-16	2.06387e-15	l(2)05714
FBgn0032895	1007.45	-3.72039	0.538267	-6.91179	4.7857e-12	2.75016e-11	twit	X	FBgn0261349	96.771	4.78787	0.842529	5.68273	1.33e-08	7.33e-08	Mst36Fb	X	FBgn0000489	410.413	3.72639	0.457184	8.15074	3.61712e-16	2.07048e-15	Pka-C3
FBgn0033543	906.637	3.0366	0.439353	6.91153	4.79443e-12	2.75356e-11	CG12338	X	FBgn0086350	463.781	-3.37943	0.595023	-5.67949	1.35e-08	7.47e-08	tef	X	FBgn0040233	517.266	2.60298	0.319368	8.15043	3.62636e-16	2.07455e-15	cana
FBgn0038275	415.237	-2.96413	0.428955	-6.91012	4.84244e-12	2.7795e-11	CG3817	X	FBgn0002917	308.524	-3.07984	0.542671	-5.67534	1.38e-08	7.65e-08	na	X	FBgn0036723	161.259	6.17908	0.758234	8.1493	3.66046e-16	2.09283e-15	CG12229
FBgn0024754	3742.65	-2.01142	0.291161	-6.90828	4.90564e-12	2.81412e-11	Flo1	X	FBgn0051217	451.029	3.67081	0.647445	5.66969	1.43e-08	7.9e-08	modSP	X	FBgn0261847	108.672	8.43851	1.03583	8.14664	3.74178e-16	2.13806e-15	CG42779
FBgn0029866	350.75	3.23917	0.46892	6.90773	4.92464e-12	2.82336e-11	CG3842	X	FBgn0039911	553.789	-2.74025	0.483395	-5.66876	1.44e-08	7.94e-08	CG1909	X	FBgn0025680	121.907	3.37025	0.413753	8.14556	3.77539e-16	2.156e-15	cry
FBgn0011672	2128.67	2.02189	0.292752	6.90648	4.96812e-12	2.84662e-11	Mvl	X	FBgn0262141	299.421	3.90039	0.688104	5.66831	1.44e-08	7.95e-08	CG42867	X	FBgn0058470	788.824	-3.15955	0.387917	-8.14491	3.79566e-16	2.16631e-15	CG40470
FBgn0031182	156.182	3.70278	0.536259	6.90485	5.02581e-12	2.87799e-11	Cyp6t1	X	FBgn0034937	111.379	3.84781	0.679423	5.66336	1.48e-08	8.18e-08	fzr2	X	FBgn0260657	602.824	-2.92614	0.359385	-8.14208	3.88552e-16	2.21629e-15	CG42540
FBgn0015756	20858.5	-2.47148	0.357946	-6.90462	5.03383e-12	2.88089e-11	RpL9	X	FBgn0011715	2000	-2.13015	0.37619	-5.66242	1.49e-08	8.21e-08	Snr1	X	FBgn0027093	1239.83	-1.62081	0.199139	-8.13907	3.98328e-16	2.27073e-15	ArgRS
FBgn0032658	65.0469	7.4353	1.07696	6.90397	5.0569e-12	2.89241e-11	CG5681	X	FBgn0031808	55.1163	5.0326	0.888763	5.66248	1.49e-08	8.21e-08	CG9507	X	FBgn0002780	3591.61	-1.93844	0.238246	-8.13627	4.07631e-16	2.3224e-15	mod
FBgn0039734	896.529	-3.28724	0.476365	-6.90068	5.17527e-12	2.95838e-11	Tace	X	FBgn0036340	1824.4	-2.2441	0.396304	-5.66258	1.49e-08	8.21e-08	SRm160	X	FBgn0284244	1617.47	4.24638	0.52195	8.13561	4.09866e-16	2.33377e-15	l(2)k05911
FBgn0036340	1512.87	-2.31686	0.335832	-6.89885	5.24244e-12	2.99502e-11	SRm160	X	FBgn0005427	1937.58	-2.37034	0.418724	-5.66086	1.51e-08	8.28e-08	ewg	X	FBgn0013678	46967.2	-2.54093	0.312628	-8.12767	4.37629e-16	2.49039e-15	CYTB
FBgn0064227	232.511	-3.87459	0.561817	-6.89654	5.32848e-12	3.0424e-11	Rdh	X	FBgn0038511	287.13	3.38484	0.598364	5.65682	1.54e-08	8.47e-08	cysu	X	FBgn0040843	183.266	6.54566	0.805388	8.12734	4.38825e-16	2.49574e-15	CG15213
FBgn0261596	21470	-2.20041	0.31907	-6.89633	5.33637e-12	3.04512e-11	RpS24	X	FBgn0031548	121.179	3.81837	0.675319	5.65418	1.57e-08	8.6e-08	CG8852	X	FBgn0052461	65.4923	5.64426	0.694592	8.12601	4.43656e-16	2.52174e-15	CG32461
FBgn0262782	9502.08	1.76887	0.256499	6.89623	5.34011e-12	3.04548e-11	Mdh1	X	FBgn0003886	338.523	2.96147	0.524015	5.6515	1.59e-08	8.73e-08	alphaTub85E	X	FBgn0039261	2349.06	-1.91698	0.236011	-8.1224	4.57043e-16	2.59631e-15	CG6422
FBgn0051522	2747.86	2.11463	0.306662	6.89565	5.36208e-12	3.05623e-11	CG31522	X	FBgn0010422	2076.19	-2.35836	0.417322	-5.65118	1.59e-08	8.74e-08	TfIIS	X	FBgn0030356	188.238	5.17913	0.63787	8.11941	4.68449e-16	2.65955e-15	CR32661
FBgn0052544	365.731	-3.32613	0.482478	-6.89385	5.43027e-12	3.09329e-11	CG32544	X	FBgn0023001	639.121	2.69282	0.476745	5.64833	1.62e-08	8.88e-08	melt	X	FBgn0033544	4043.94	1.9776	0.243579	8.11893	4.7031e-16	2.66857e-15	CG7220
FBgn0029994	817.858	3.45714	0.50151	6.89345	5.44549e-12	3.10016e-11	CG2254	X	FBgn0029663	328.586	-4.10089	0.726047	-5.64825	1.62e-08	8.88e-08	CG10804	X	FBgn0030309	3209.98	2.37011	0.291959	8.11793	4.74183e-16	2.68897e-15	CG1572
FBgn0027376	182.334	6.2745	0.910333	6.89253	5.48075e-12	3.11841e-11	rha	X	FBgn0030932	341.83	2.69405	0.477	5.64791	1.62e-08	8.89e-08	Ggt-1	X	FBgn0263390	193.539	4.47636	0.551458	8.11731	4.76636e-16	2.70131e-15	Nha2
FBgn0037433	397.628	2.54888	0.369922	6.89032	5.56682e-12	3.16554e-11	CG17919	X	FBgn0041180	1940.78	2.83965	0.503316	5.64188	1.68e-08	9.21e-08	Tep4	X	FBgn0032346	403.394	-2.79106	0.343865	-8.11672	4.78944e-16	2.71281e-15	Csl4
FBgn0051191	93.5679	-6.26923	0.909927	-6.88982	5.58643e-12	3.17485e-11	CG31191	X	FBgn0026428	1781.55	2.66294	0.472426	5.63673	1.73e-08	9.48e-08	HDAC6	X	FBgn0039651	109.823	4.95146	0.610199	8.11451	4.87751e-16	2.76109e-15	Cyt-c1L
FBgn0032693	244.01	3.88379	0.563724	6.88952	5.59808e-12	3.17962e-11	Cyp310a1	X	FBgn0039480	209.833	5.18962	0.921052	5.63445	1.76e-08	9.6e-08	Cpr97Ea	X	FBgn0053080	899.107	1.86852	0.230276	8.11426	4.88741e-16	2.76508e-15	CG33080
FBgn0263077	664.747	2.33385	0.338784	6.8889	5.62269e-12	3.19174e-11	CG43340	X	FBgn0260480	80.343	4.32028	0.767516	5.62891	1.81e-08	9.91e-08	CG32295	X	FBgn0261933	1517.69	-2.30345	0.284037	-8.10968	5.07535e-16	2.86974e-15	SmD1
FBgn0028646	1214.23	2.26996	0.329559	6.88788	5.66302e-12	3.21277e-11	aralar1	X	FBgn0036815	1040.55	-2.26675	0.403027	-5.62431	1.86e-08	1.02e-07	HipHop	X	FBgn0034935	1357.57	-2.85284	0.351834	-8.10849	5.12514e-16	2.89621e-15	Orcokinin
FBgn0022960	1688.13	-1.85266	0.269053	-6.88586	5.74411e-12	3.25688e-11	vimar	X	FBgn0013272	5020.92	2.37476	0.422288	5.62356	1.87e-08	1.02e-07	Gp150	X	FBgn0002914	1964.07	-1.73987	0.214582	-8.10819	5.13793e-16	2.90175e-15	Myb
FBgn0036641	1655.69	-1.87032	0.271688	-6.88408	5.81633e-12	3.29592e-11	Smn	X	FBgn0020238	76410.7	-1.88639	0.335687	-5.61949	1.92e-08	1.04e-07	14-3-3epsilon	X	FBgn0261930	221.513	3.09184	0.381342	8.10778	5.15521e-16	2.90982e-15	vnd
FBgn0053926	78.805	5.47366	0.79514	6.88389	5.82386e-12	3.29828e-11	CG33926	X	FBgn0030260	1932.09	-2.63481	0.469095	-5.6168	1.95e-08	1.06e-07	CG1537	X	FBgn0035993	655.607	-2.26971	0.280271	-8.09827	5.57456e-16	3.1447e-15	Nf-YA
FBgn0263392	5883.95	-2.38801	0.346975	-6.88237	5.88634e-12	3.33173e-11	Tet	X	FBgn0038952	125.786	3.57505	0.636744	5.61458	1.97e-08	1.07e-07	CG7069	X	FBgn0033504	2114.31	1.81982	0.224782	8.09594	5.68245e-16	3.20371e-15	CAP
FBgn0264607	6077.22	-1.80819	0.262864	-6.87878	6.03666e-12	3.41484e-11	CaMKII	X	FBgn0010583	4492.49	-2.60873	0.464695	-5.61385	1.98e-08	1.08e-07	dock	X	FBgn0031460	93.9721	6.85095	0.846992	8.08857	6.03695e-16	3.40159e-15	CG15399
FBgn0036029	180.674	5.52513	0.803491	6.87641	6.13799e-12	3.47015e-11	CG16719	X	FBgn0035829	2290.94	-2.53336	0.451694	-5.60859	2.04e-08	1.11e-07	HP4	X	FBgn0265262	2322.55	-1.61743	0.199974	-8.08821	6.05457e-16	3.40955e-15	Vha68-1
FBgn0038575	120.919	5.77715	0.840447	6.8739	6.2472e-12	3.52985e-11	CG7208	X	FBgn0003463	2911.61	2.80135	0.49989	5.60393	2.1e-08	1.14e-07	sog	X	FBgn0030313	121.997	5.1946	0.642486	8.08515	6.20883e-16	3.4944e-15	CG11697
FBgn0052549	2268.25	2.77452	0.403755	6.87179	6.33993e-12	3.58017e-11	CG32549	X	FBgn0264000	240.861	-3.19897	0.570969	-5.60271	2.11e-08	1.15e-07	GluRIB	X	FBgn0259923	824.56	-2.84035	0.351418	-8.08253	6.34363e-16	3.5682e-15	2020-09-04
FBgn0020381	801.415	1.94297	0.282795	6.87057	6.39438e-12	3.60884e-11	Dredd	X	FBgn0262815	64.0581	5.73995	1.02539	5.59781	2.17e-08	1.18e-07	CR43186	X	FBgn0261989	1641.74	3.86683	0.478559	8.08016	6.46807e-16	3.63609e-15	CG42807
FBgn0038465	794.96	3.01448	0.43893	6.86779	6.52024e-12	3.67775e-11	Irc	X	FBgn0037659	854.665	-2.53263	0.452447	-5.59764	2.17e-08	1.18e-07	Kdm2	X	FBgn0043364	1621.52	2.10895	0.261053	8.07863	6.54979e-16	3.67991e-15	cbt
FBgn0036661	5311.14	-1.60925	0.234377	-6.86609	6.59872e-12	3.71987e-11	CG9705	X	FBgn0266436	163.797	4.96168	0.886504	5.59691	2.18e-08	1.18e-07	CG45066	X	FBgn0036417	3778.44	8.85038	1.09562	8.07794	6.58688e-16	3.69861e-15	CG7906
FBgn0085405	760.598	2.05039	0.298712	6.86409	6.6918e-12	3.77017e-11	CG34376	X	FBgn0262473	1647.36	-2.26761	0.405196	-5.59632	2.19e-08	1.19e-07	Tl	X	FBgn0037536	3110.56	1.94245	0.240518	8.0761	6.68689e-16	3.75261e-15	CG2698
FBgn0035171	207.803	-3.47898	0.507062	-6.86106	6.83537e-12	3.84883e-11	CG12502	X	FBgn0003117	162.073	3.29751	0.589258	5.59603	2.19e-08	1.19e-07	pnr	X	FBgn0035444	1683.1	1.60177	0.198587	8.0658	7.27601e-16	4.08086e-15	CG12012
FBgn0264089	2407.83	-2.82214	0.411366	-6.86041	6.86653e-12	3.86415e-11	sli	X	FBgn0039501	122.735	3.56836	0.63769	5.59576	2.2e-08	1.19e-07	CG5987	X	FBgn0000412	5657.52	-2.084	0.258402	-8.06494	7.32722e-16	4.10721e-15	D1
FBgn0010300	20217.1	-3.0339	0.442809	-6.85147	7.30924e-12	4.11092e-11	brat	X	FBgn0050148	691.619	3.79741	0.678694	5.59517	2.2e-08	1.19e-07	CG30148	X	FBgn0267978	1103.77	-2.26383	0.280734	-8.06399	7.38464e-16	4.13701e-15	ap
FBgn0034218	167.088	-3.52028	0.513907	-6.85004	7.38286e-12	4.14994e-11	CG18467	X	FBgn0034797	883.154	2.95431	0.52804	5.59487	2.21e-08	1.19e-07	nahoda	X	FBgn0264086	159.026	3.63587	0.451129	8.05949	7.6612e-16	4.28948e-15	CG43755
FBgn0027835	6762.58	2.16049	0.315591	6.84587	7.60151e-12	4.27039e-11	Dp1	X	FBgn0030536	199.188	3.76468	0.673033	5.59361	2.22e-08	1.2e-07	CG11068	X	FBgn0040066	1055.05	-2.01732	0.250395	-8.05653	7.84888e-16	4.39203e-15	wds
FBgn0030394	255.574	6.42538	0.939168	6.84157	7.83319e-12	4.39802e-11	Cpr11A	X	FBgn0259745	2445.09	-2.78077	0.497158	-5.59334	2.23e-08	1.2e-07	wech	X	FBgn0001149	22005.2	2.13362	0.265048	8.04994	8.28376e-16	4.63272e-15	GstD1
FBgn0034259	3108.11	-2.05187	0.299996	-6.83965	7.93854e-12	4.45461e-11	P32	X	FBgn0029994	1257.11	3.74787	0.670327	5.59111	2.26e-08	1.22e-07	CG2254	X	FBgn0087021	601.306	-2.42427	0.301186	-8.0491	8.34053e-16	4.66179e-15	Spc25
FBgn0085414	870.714	-2.79978	0.409619	-6.83508	8.19566e-12	4.59625e-11	dpr12	X	FBgn0034247	125.52	3.76422	0.673553	5.5886	2.29e-08	1.23e-07	CG6484	X	FBgn0035501	1331.16	2.13081	0.264791	8.04714	8.47503e-16	4.73424e-15	CG1299
FBgn0030997	551.119	-2.64666	0.38762	-6.82799	8.61148e-12	4.82668e-11	CG7990	X	FBgn0053474	98.4119	4.04493	0.723819	5.58832	2.29e-08	1.24e-07	CG33474	X	FBgn0052657	176.608	5.18286	0.644246	8.04484	8.63549e-16	4.82111e-15	CR32657
FBgn0035756	567.279	-3.48201	0.510159	-6.82534	8.7717e-12	4.91085e-11	unc-13-4A	X	FBgn0263034	116.372	4.32599	0.774296	5.587	2.31e-08	1.24e-07	CG43329	X	FBgn0033543	888.032	2.40441	0.298919	8.04369	8.71718e-16	4.86393e-15	CG12338
FBgn0051646	247.415	-2.75224	0.403262	-6.82494	8.79591e-12	4.92158e-11	DIP-theta	X	FBgn0031240	170.556	4.05657	0.726458	5.58404	2.35e-08	1.27e-07	CG3345	X	FBgn0034470	3592.05	7.66938	0.953558	8.0429	8.77345e-16	4.89252e-15	Obp56d
FBgn0085427	854.621	3.57052	0.5233	6.82309	8.90997e-12	4.98255e-11	CG34398	X	FBgn0086200	77.6164	6.50114	1.16438	5.58334	2.36e-08	1.27e-07	CR42490	X	FBgn0039816	597.227	-3.44593	0.429153	-8.02961	9.77864e-16	5.44994e-15	CG11317
FBgn0030846	108.118	3.38528	0.496238	6.82189	8.98519e-12	5.02174e-11	CG12992	X	FBgn0035016	4278.61	-2.2206	0.39781	-5.58207	2.38e-08	1.28e-07	CG4612	X	FBgn0261975	1343.85	-2.23083	0.277843	-8.0291	9.81926e-16	5.46945e-15	CG42806
FBgn0034001	600.07	-2.38988	0.350351	-6.82138	9.01691e-12	5.03659e-11	mRpL41	X	FBgn0037166	1234.49	-2.18633	0.39175	-5.58093	2.39e-08	1.29e-07	CG11426	X	FBgn0036204	62.0297	6.64362	0.827589	8.02768	9.93364e-16	5.52999e-15	Tim13
FBgn0031818	1337.95	1.91857	0.281402	6.8179	9.23823e-12	5.15432e-11	CG9536	X	FBgn0039908	1757.51	-2.14348	0.384233	-5.57858	2.42e-08	1.3e-07	Asator	X	FBgn0004369	1929.19	-1.71992	0.214281	-8.02647	1.00316e-15	5.5813e-15	Ptp99A
FBgn0031037	6922.16	1.67048	0.245047	6.81697	9.29834e-12	5.1849e-11	CG14207	X	FBgn0015576	189.556	5.02552	0.901273	5.57602	2.46e-08	1.32e-07	alpha-Est8	X	FBgn0030343	705.477	1.83519	0.228661	8.02582	1.00853e-15	5.60803e-15	ATP7
FBgn0032149	660.851	-1.96509	0.28838	-6.81423	9.47668e-12	5.27832e-11	CG4036	X	FBgn0031360	1715.81	2.32425	0.416918	5.57485	2.48e-08	1.33e-07	CG31937	X	FBgn0039283	610.965	-2.08384	0.259825	-8.02016	1.05607e-15	5.86901e-15	danr
FBgn0262587	168.81	4.71569	0.692027	6.81431	9.47199e-12	5.27832e-11	CG43124	X	FBgn0267520	195.644	5.15407	0.924563	5.57461	2.48e-08	1.33e-07	28SrRNA-Psi:CR45860	X	FBgn0031134	90.8715	6.91372	0.862115	8.01948	1.06195e-15	5.89829e-15	CG1314
FBgn0033853	1005.58	2.08059	0.305338	6.81405	9.48889e-12	5.28211e-11	CG6145	X	FBgn0085383	695.813	-4.04686	0.726073	-5.57363	2.49e-08	1.34e-07	CG34354	X	FBgn0028896	112.72	4.98669	0.622543	8.01019	1.14533e-15	6.3578e-15	CG17329
FBgn0037521	885.788	-2.4746	0.363222	-6.81291	9.56425e-12	5.32103e-11	CG2993	X	FBgn0029092	3175.86	1.97492	0.35453	5.57053	2.54e-08	1.36e-07	ced-6	X	FBgn0039022	111.517	6.79197	0.848046	8.00897	1.15672e-15	6.41736e-15	CG4725
FBgn0259110	1139.72	-3.64276	0.534968	-6.80931	9.80705e-12	5.45301e-11	mmd	X	FBgn0015664	1645.59	-2.32461	0.417386	-5.56945	2.56e-08	1.37e-07	Dref	X	FBgn0036316	2228.34	-1.98707	0.248201	-8.00589	1.1861e-15	6.57658e-15	CG10960
FBgn0028514	79.6518	5.60677	0.823554	6.80802	9.89504e-12	5.49881e-11	CG4793	X	FBgn0033609	1034.95	-2.43603	0.437809	-5.56413	2.63e-08	1.41e-07	Fbl6	X	FBgn0030331	75.6322	6.93781	0.867103	8.00113	1.23283e-15	6.8318e-15	CG15221
FBgn0033912	17366.5	-2.5718	0.377808	-6.80717	9.95346e-12	5.52813e-11	RpS23	X	FBgn0263628	97.6926	5.16409	0.928388	5.56242	2.66e-08	1.42e-07	CR43637	X	FBgn0033378	2124.97	-1.98339	0.247908	-8.00051	1.23903e-15	6.86225e-15	tsu
FBgn0038901	226.411	-2.7998	0.411337	-6.80657	9.99547e-12	5.54831e-11	Burs	X	FBgn0029113	3368.79	-2.27245	0.40858	-5.56182	2.67e-08	1.43e-07	Uba2	X	FBgn0022774	3169.67	2.09152	0.261562	7.99629	1.28229e-15	7.0978e-15	Oat
FBgn0040929	843.065	-2.43526	0.357789	-6.80641	1.00062e-11	5.55114e-11	CG12659	X	FBgn0046113	72.2526	5.11522	0.919881	5.56074	2.69e-08	1.44e-07	GluRIIC	X	FBgn0044047	774.034	1.84447	0.230915	7.98765	1.37536e-15	7.60867e-15	Ilp6
FBgn0037770	2567.93	-1.86178	0.273563	-6.80568	1.00576e-11	5.57644e-11	Art4	X	FBgn0284246	688.218	-2.44715	0.440235	-5.55875	2.72e-08	1.45e-07	l(2)k09848	X	FBgn0266579	1839.29	-1.98622	0.248822	-7.98248	1.43424e-15	7.9299e-15	tau
FBgn0030160	2877.75	1.84623	0.271328	6.80442	1.01456e-11	5.62204e-11	CG9691	X	FBgn0034725	823.178	-2.3034	0.41448	-5.55732	2.74e-08	1.46e-07	CG6044	X	FBgn0031941	82.5007	7.59346	0.951312	7.98209	1.43875e-15	7.95028e-15	ATPsynGL
[truncated: 8,057 more rows]

## Sheet: Fig2_SupTable2
Fly ID	RPL10-IP-1 Normalized Counts	X	Fly ID	RPL10-IP-2 Normalized Counts	Figure 2 - Supplemental Table 2. Normalized counts for mRNAs co-precipitated with RpL10 in the absence of hTDP-43.
[truncated: 14,981 more rows]

[truncated: 5 more sheets: Fig2_SupTable3, FIg2_SupTable4, Fig2_SupTable5, Fig2_SupTable6, Fig2_SupTable7]
